# Supplementary material for: Molecular conformational effects on the overall rate constant and the branching ratios of the n-heptane + OH reaction: an ab initio and variational transition state theory study
Source: Royal Society of Chemistry journal article supplement (doi:10.1039/d5cp00301f), 2025-01-01
Supplement: d5cp00301f1.pdf [file d5cp00301f1.pdf]

## Supplementary Information

### Molecular conformational effects on the overall rate constant and the branching ratios of the *n*-heptane + OH reaction: An *ab initio* and variational transition state theory study

M. Belmekki, M. Monge-Palacios\*, T. Wang and S. M. Sarathy

*King Abdullah University of Science and Technology (KAUST), Physical Sciences and Engineering Division, Clean Energy Research Platform (CERP), Thuwal (Makkah), 23955-6900, Saudi Arabia*

\*E-mail: [manuel.mongepalacios@kaust.edu.sa](mailto:manuel.mongepalacios@kaust.edu.sa)

|                                                                                                                                                                                                                                                                                                                                                                     |    |
|---------------------------------------------------------------------------------------------------------------------------------------------------------------------------------------------------------------------------------------------------------------------------------------------------------------------------------------------------------------------|----|
| <b>Table S1.</b> Optimized Cartesian coordinates matrix and vibrational frequencies of all the conformers of the <i>n</i> -heptane and the saddle point species involved in reactions R1-R4 at the M06-2X/aug-cc-pVTZ level of theory .....                                                                                                                         | 2  |
| <b>Table S2.</b> Computed energies of all the conformers of the stationary points involved in reactions R1-R4 at the M06-2X/aug-cc-pVTZ and CCSD(T)/aug-cc-pVTZ//M06-2X/aug-cc-pVTZ levels of theory with their associated T1 diagnostic values provided for the conformers whose energy is below 1 kcal mol <sup>-1</sup> of the corresponding global minimum..... | 65 |
| <b>Table S3.</b> Site-specific rate constants obtained with the SS-HO-LL approach .....                                                                                                                                                                                                                                                                             | 68 |
| <b>Table S4.</b> Site-specific rate constants obtained with the SS-HO-HL approach .....                                                                                                                                                                                                                                                                             | 68 |
| <b>Table S5.</b> Site-specific rate constants obtained with the MS-T-HL approach.....                                                                                                                                                                                                                                                                               | 69 |
| <b>Table S6.</b> Site-specific rate constants obtained with the MS-T-HL_0.5 approach.....                                                                                                                                                                                                                                                                           | 69 |
| <b>Table S7.</b> Site-specific rate constants obtained with the MS-T-HL_1.0 approach.....                                                                                                                                                                                                                                                                           | 70 |

**Table S1.** Optimized Cartesian coordinates matrix and vibrational frequencies of all the conformers of the n-heptane and the saddle point species involved in reactions R1-R4 at the M06-2X/aug-cc-pVTZ level of theory

| Conformer species | Geometry (Å) |             |             | Frequencies (cm <sup>-1</sup> ) |                                                                                                                                                                                                                                                                                                                                                                                                                                                                                                                                                                                                                                                                        |
|-------------------|--------------|-------------|-------------|---------------------------------|------------------------------------------------------------------------------------------------------------------------------------------------------------------------------------------------------------------------------------------------------------------------------------------------------------------------------------------------------------------------------------------------------------------------------------------------------------------------------------------------------------------------------------------------------------------------------------------------------------------------------------------------------------------------|
| n-heptane_1       | C            | -3.80717178 | -0.35596736 | -0.00000004                     | 65.6113, 73.9494, 100.1713, 144.1797, 145.0937, 244.7554, 247.2133, 248.5124, 306.9299, 421.9920, 487.8794, 727.1549, 734.9753, 773.3901, 849.6397, 896.2361, 927.4946, 942.7722, 1020.7411, 1030.9346, 1062.2940, 1087.6354, 1089.9824, 1101.1320, 207.3254, 1243.9078, 1257.8138, 1295.1243, 1317.2535, 1326.3293, 1333.9146, 1339.9993, 1369.9234, 1403.8659, 1409.7655, 1413.2859, 1416.1307, 1485.4881, 1485.6073, 1491.1407, 1496.6661, 1502.8408, 1502.9107, 1504.3303, 1511.5837, 1515.5993, 3028.4736, 3029.9720, 3037.6233, 3047.8111, 3049.77073056.5932, 3056.8965, 3059.0592, 3072.7528, 3085.1919, 3092.9886, 3122.6583, 3122.8757, 3131.5038, 3131.6150 |
|                   | H            | -3.83984778 | -0.99962975 | 0.88025638                      |                                                                                                                                                                                                                                                                                                                                                                                                                                                                                                                                                                                                                                                                        |
|                   | H            | -4.70763972 | 0.25731720  | -0.00000039                     |                                                                                                                                                                                                                                                                                                                                                                                                                                                                                                                                                                                                                                                                        |
|                   | H            | -3.83984739 | -0.99962905 | -0.88025687                     |                                                                                                                                                                                                                                                                                                                                                                                                                                                                                                                                                                                                                                                                        |
|                   | C            | -1.27203629 | -0.34116738 | 0.00000022                      |                                                                                                                                                                                                                                                                                                                                                                                                                                                                                                                                                                                                                                                                        |
|                   | H            | -1.27303627 | -0.99879095 | 0.87509225                      |                                                                                                                                                                                                                                                                                                                                                                                                                                                                                                                                                                                                                                                                        |
|                   | H            | -1.27303581 | -0.99879070 | -0.87509304                     |                                                                                                                                                                                                                                                                                                                                                                                                                                                                                                                                                                                                                                                                        |
|                   | C            | -2.54473496 | 0.49607013  | 0.00000017                      |                                                                                                                                                                                                                                                                                                                                                                                                                                                                                                                                                                                                                                                                        |
|                   | H            | -2.54181512 | 1.15188818  | -0.87449573                     |                                                                                                                                                                                                                                                                                                                                                                                                                                                                                                                                                                                                                                                                        |
|                   | H            | -2.54181555 | 1.15188750  | 0.87449661                      |                                                                                                                                                                                                                                                                                                                                                                                                                                                                                                                                                                                                                                                                        |
|                   | C            | 0.00000007  | 0.49619283  | -0.00000017                     |                                                                                                                                                                                                                                                                                                                                                                                                                                                                                                                                                                                                                                                                        |
|                   | H            | 0.00000003  | 1.15355751  | 0.87515911                      |                                                                                                                                                                                                                                                                                                                                                                                                                                                                                                                                                                                                                                                                        |
|                   | H            | 0.00000061  | 1.15355775  | -0.87515828                     |                                                                                                                                                                                                                                                                                                                                                                                                                                                                                                                                                                                                                                                                        |
|                   | C            | 1.27203599  | -0.34116781 | -0.00000035                     |                                                                                                                                                                                                                                                                                                                                                                                                                                                                                                                                                                                                                                                                        |
|                   | H            | 1.27303621  | -0.99879062 | -0.87509256                     |                                                                                                                                                                                                                                                                                                                                                                                                                                                                                                                                                                                                                                                                        |
|                   | H            | 1.27303672  | -0.99879111 | 0.87509273                      |                                                                                                                                                                                                                                                                                                                                                                                                                                                                                                                                                                                                                                                                        |
|                   | C            | 2.54473467  | 0.49607028  | -0.00000005                     |                                                                                                                                                                                                                                                                                                                                                                                                                                                                                                                                                                                                                                                                        |
| H                 | 2.54181553   | 1.15188795  | -0.87449600 |                                 |                                                                                                                                                                                                                                                                                                                                                                                                                                                                                                                                                                                                                                                                        |
| H                 | 2.54181607   | 1.15188702  | 0.87449634  |                                 |                                                                                                                                                                                                                                                                                                                                                                                                                                                                                                                                                                                                                                                                        |
| C                 | 3.80717176   | -0.35596714 | 0.00000014  |                                 |                                                                                                                                                                                                                                                                                                                                                                                                                                                                                                                                                                                                                                                                        |
| H                 | 3.83984761   | -0.99962895 | -0.88025648 |                                 |                                                                                                                                                                                                                                                                                                                                                                                                                                                                                                                                                                                                                                                                        |
| H                 | 3.83984809   | -0.99963029 | 0.88025585  |                                 |                                                                                                                                                                                                                                                                                                                                                                                                                                                                                                                                                                                                                                                                        |
| H                 | 4.70763992   | 0.25731702  | 0.00000056  |                                 |                                                                                                                                                                                                                                                                                                                                                                                                                                                                                                                                                                                                                                                                        |
| n-heptane_2       | C            | -3.70206678 | 0.03360892  | 0.14566506                      | 47.0855, 79.3152, 115.4298, 134.4324, 146.8374, 244.2441, 245.6840, 288.1332, 358.1335, 396.8340, 496.3620, 724.9348, 744.6567, 778.9186, 842.6708, 884.1732, 919.4076, 946.2947, 984.5953, 1031.7831, 1052.3778, 1082.7736, 1096.8329, 1107.7901, 97.7445, 1238.5393, 1261.3813, 1294.9541, 1311.0794, 1332.2872, 1335.2544, 1348.3553, 1379.2223, 1396.0043, 1409.1335, 1413.0634, 1416.2128, 1482.9391, 1485.9044, 1492.7377, 1494.1798, 1502.8995, 1504.2995, 1505.9000, 1513.2008, 1513.7994, 3028.5903, 3031.6269, 3040.5681, 3047.9885, 3048.8224, 057.4290, 3058.5557, 3068.1375, 3080.9940, 3086.3566, 3095.5787, 3123.4728, 3124.9158, 3131.3694, 3134.8457  |
|                   | H            | -3.76825414 | -0.13371177 | 1.22169493                      |                                                                                                                                                                                                                                                                                                                                                                                                                                                                                                                                                                                                                                                                        |
|                   | H            | -4.49018362 | 0.73204320  | -0.13367241                     |                                                                                                                                                                                                                                                                                                                                                                                                                                                                                                                                                                                                                                                                        |
|                   | H            | -3.90593248 | -0.91722124 | -0.34885299                     |                                                                                                                                                                                                                                                                                                                                                                                                                                                                                                                                                                                                                                                                        |
|                   | C            | -1.20489821 | -0.40375911 | 0.14592053                      |                                                                                                                                                                                                                                                                                                                                                                                                                                                                                                                                                                                                                                                                        |
|                   | H            | -1.23981388 | -0.58708036 | 1.22466203                      |                                                                                                                                                                                                                                                                                                                                                                                                                                                                                                                                                                                                                                                                        |
|                   | H            | -1.38144613 | -1.37192875 | -0.33326839                     |                                                                                                                                                                                                                                                                                                                                                                                                                                                                                                                                                                                                                                                                        |
|                   | C            | -2.32363908 | 0.55699701  | -0.23613908                     |                                                                                                                                                                                                                                                                                                                                                                                                                                                                                                                                                                                                                                                                        |
|                   | H            | -2.28419406 | 0.74229367  | -1.31271074                     |                                                                                                                                                                                                                                                                                                                                                                                                                                                                                                                                                                                                                                                                        |
|                   | H            | -2.14814933 | 1.52150452  | 0.24729677                      |                                                                                                                                                                                                                                                                                                                                                                                                                                                                                                                                                                                                                                                                        |
|                   | C            | 0.18066186  | 0.10250879  | -0.23377981                     |                                                                                                                                                                                                                                                                                                                                                                                                                                                                                                                                                                                                                                                                        |
|                   | H            | 0.34099324  | 1.07773628  | 0.23312507                      |                                                                                                                                                                                                                                                                                                                                                                                                                                                                                                                                                                                                                                                                        |
|                   | H            | 0.22229641  | 0.26850344  | -1.31557315                     |                                                                                                                                                                                                                                                                                                                                                                                                                                                                                                                                                                                                                                                                        |
|                   | C            | 1.29384708  | -0.85743400 | 0.17065985                      |                                                                                                                                                                                                                                                                                                                                                                                                                                                                                                                                                                                                                                                                        |
|                   | H            | 1.06296520  | -1.85028650 | -0.22456040                     |                                                                                                                                                                                                                                                                                                                                                                                                                                                                                                                                                                                                                                                                        |
|                   | H            | 1.30294699  | -0.95489138 | 1.26101194                      |                                                                                                                                                                                                                                                                                                                                                                                                                                                                                                                                                                                                                                                                        |
|                   | C            | 2.68179833  | -0.43853249 | -0.30792530                     |                                                                                                                                                                                                                                                                                                                                                                                                                                                                                                                                                                                                                                                                        |
| H                 | 3.40019839   | -1.21347020 | -0.03386629 |                                 |                                                                                                                                                                                                                                                                                                                                                                                                                                                                                                                                                                                                                                                                        |
| H                 | 2.68339556   | -0.38914946 | -1.40011286 |                                 |                                                                                                                                                                                                                                                                                                                                                                                                                                                                                                                                                                                                                                                                        |
| C                 | 3.14364500   | 0.89819974  | 0.26208417  |                                 |                                                                                                                                                                                                                                                                                                                                                                                                                                                                                                                                                                                                                                                                        |
| H                 | 3.09439470   | 0.89025095  | 1.35264798  |                                 |                                                                                                                                                                                                                                                                                                                                                                                                                                                                                                                                                                                                                                                                        |
| H                 | 2.52264950   | 1.72047993  | -0.09214148 |                                 |                                                                                                                                                                                                                                                                                                                                                                                                                                                                                                                                                                                                                                                                        |
| H                 | 4.17204450   | 1.11539448  | -0.02459255 |                                 |                                                                                                                                                                                                                                                                                                                                                                                                                                                                                                                                                                                                                                                                        |
| n-heptane_3       | C            | -3.44430417 | -0.79948929 | 0.10576099                      | 65.0924, 72.5589, 97.5627, 125.6634, 206.3189, 240.8220, 247.3269, 273.8433, 311.4975, 407.2219, 516.3271, 726.5126, 743.7327, 783.6639, 853.3271, 869.9121,                                                                                                                                                                                                                                                                                                                                                                                                                                                                                                           |
|                   | H            | -3.42381828 | -1.06287364 | 1.16429455                      |                                                                                                                                                                                                                                                                                                                                                                                                                                                                                                                                                                                                                                                                        |
|                   | H            | -4.46428919 | -0.51289212 | -0.14820609                     |                                                                                                                                                                                                                                                                                                                                                                                                                                                                                                                                                                                                                                                                        |
|                   | H            | -3.19718844 | -1.69754862 | -0.46220777                     |                                                                                                                                                                                                                                                                                                                                                                                                                                                                                                                                                                                                                                                                        |
|                   | C            | -1.02012608 | -0.05755806 | 0.16098046                      |                                                                                                                                                                                                                                                                                                                                                                                                                                                                                                                                                                                                                                                                        |
|                   | H            | -0.96274304 | -0.30510879 | 1.22647083                      |                                                                                                                                                                                                                                                                                                                                                                                                                                                                                                                                                                                                                                                                        |

|             |             |             |             |                                  |                                       |
|-------------|-------------|-------------|-------------|----------------------------------|---------------------------------------|
|             | H           | -0.75043317 | -0.96818751 | -0.38037435                      | 917.6691, 943.3285, 987.4851,         |
|             | C           | -2.45387462 | 0.31851463  | -0.19200861                      | 1039.6484, 1057.3761, 1072.9004,      |
|             | H           | -2.50327340 | 0.58315407  | -1.25156174                      | 1093.9838, 1110.6257, 16.4077,        |
|             | H           | -2.73489799 | 1.21820384  | 0.36145594                       | 1244.1191, 1270.6435, 1295.5201,      |
|             | C           | -0.02195738 | 1.05122484  | -0.15328133                      | 1310.1215, 1331.2696, 1333.1307,      |
|             | H           | -0.37009328 | 1.97848121  | 0.30963498                       | 1344.0412, 1377.0407, 1404.5499,      |
|             | H           | -0.01588635 | 1.23095049  | -1.23303702                      | 1409.2702, 1412.9435, 1414.0568,      |
|             | C           | 1.40081196  | 0.76172699  | 0.31677424                       | 1483.7817, 1488.3713, 1491.1690,      |
|             | H           | 1.40335496  | 0.63076516  | 1.40367673                       | 1497.6578, 1501.7328, 1503.8073,      |
|             | H           | 2.03042376  | 1.63189760  | 0.11195093                       | 1504.1161, 1511.8436, 1513.8903,      |
|             | C           | 2.03544445  | -0.46376046 | -0.33229310                      | 3029.4819, 3033.9362, 3037.4414,      |
|             | H           | 1.47562129  | -1.35948549 | -0.05689197                      | 3048.5126, 3048.7529, 56.6987,        |
|             | H           | 1.95783078  | -0.37282240 | -1.41955431                      | 3061.2032, 3068.1302, 3075.6011,      |
|             | C           | 3.49478125  | -0.63760200 | 0.06850372                       | 3092.1872, 3095.2350, 3123.0884,      |
|             | H           | 3.58819432  | -0.74130358 | 1.15063073                       | 3123.7071, 3130.3830, 3130.5325       |
|             | H           | 4.08544885  | 0.22912475  | -0.23149878                      |                                       |
|             | H           | 3.93709671  | -1.52069490 | -0.39140085                      |                                       |
| n-heptane_4 | C           | 3.24721687  | 0.64185011  | 0.31226485                       |                                       |
|             | H           | 3.39930497  | 0.22684477  | 1.30972303                       | 64.7107, 77.8751, 132.2236, 147.7734, |
|             | H           | 4.20686703  | 0.63382211  | -0.20347235                      | 199.9727, 247.8050, 277.3762,         |
|             | H           | 2.93931292  | 1.68166416  | 0.43135055                       | 294.3330, 383.0127, 403.8290,         |
|             | C           | 0.84150485  | -0.15814356 | 0.25737725                       | 505.1098, 721.1709, 743.2936,         |
|             | H           | 0.95629152  | -0.59028894 | 1.25735613                       | 798.8855, 850.7434, 857.6947,         |
|             | H           | 0.51601536  | 0.87550333  | 0.40778182                       | 919.2589, 948.4735, 970.1991,         |
|             | C           | 2.19213138  | -0.15104416 | -0.44774056                      | 1031.4239, 1041.1580, 1072.4929,      |
|             | H           | 2.06871114  | 0.26526207  | -1.45108322                      | 1093.5106, 1118.14781177.3204,        |
|             | H           | 2.53086083  | -1.18131323 | -0.58358476                      | 1239.6951, 1261.3565, 1297.2607,      |
|             | C           | -0.22441835 | -0.93183136 | -0.50920799                      | 1303.0743, 1330.3378, 1333.1082,      |
|             | H           | 0.15863038  | -1.92955166 | -0.73891895                      | 1364.3170, 1384.6608, 1389.9630,      |
|             | H           | -0.39516352 | -0.44587197 | -1.47380641                      | 1409.6004, 1412.6517, 1414.5849,      |
|             | C           | -1.54694289 | -1.07430860 | 0.24282359                       | 1480.7400, 1488.8399, 1494.4246,      |
|             | H           | -1.38389807 | -1.68970404 | 1.13151666                       | 1497.1008, 1500.7112, 1503.3326,      |
|             | H           | -2.25502239 | -1.61983452 | -0.38679678                      | 1506.4381, 1511.2113, 1518.3779,      |
|             | C           | -2.18329211 | 0.24960723  | 0.66633869                       | 3028.9931, 3041.2834, 3045.0479,      |
| H           | -3.13174526 | 0.03688385  | 1.16296075  | 3050.1899, 3056.073 3057.1073,   |                                       |
| H           | -1.55392612 | 0.73892823  | 1.41277793  | 3062.0593, 3074.2437, 3081.6093, |                                       |
| C           | -2.42496640 | 1.20104759  | -0.49974515 | 3092.8243, 3094.4128, 3122.2639, |                                       |
| H           | -3.00771117 | 0.71323783  | -1.28349769 | 3122.7416, 3131.6055, 3132.0043  |                                       |
| H           | -1.48633618 | 1.53269618  | -0.94505643 |                                  |                                       |
| H           | -2.96959155 | 2.08865843  | -0.17991434 |                                  |                                       |
| n-heptane_5 | C           | 2.99284646  | -1.00761485 | 0.04453158                       | 60.2815, 77.3173, 110.5551, 205.6794, |
|             | H           | 2.76704767  | -1.55812910 | 0.95915872                       | 206.8901, 246.0914, 256.7272,         |
|             | H           | 3.39229434  | -1.71482727 | -0.68159535                      | 295.9645, 311.1036, 428.0080,         |
|             | H           | 3.77775855  | -0.28725393 | 0.27908811                       | 527.3812, 719.4038, 748.4702,         |
|             | C           | 1.17035443  | 0.67877804  | 0.53351353                       | 792.5087, 847.6506, 881.6313,         |
|             | H           | 0.86289711  | 0.12878351  | 1.42735021                       | 892.9018, 945.7228, 969.8501,         |
|             | H           | 1.96214572  | 1.35947387  | 0.85746644                       | 1050.0761, 1057.2274, 1065.9666,      |
|             | C           | 1.74900935  | -0.30197777 | -0.48005560                      | 1072.3733, 1122.3648, 75.6155,        |
|             | H           | 1.98705149  | 0.23420921  | -1.40327363                      | 1248.5847, 1257.0754, 1304.5951,      |
|             | H           | 0.99478420  | -1.04695332 | -0.74444697                      | 1313.3061, 1328.9230, 1331.1732,      |
|             | C           | -0.00000002 | 1.50374327  | 0.00000003                       | 1346.4605, 1391.0897, 1399.5763,      |
|             | H           | 0.36377246  | 2.15835482  | -0.79640313                      | 1409.9597, 1411.5140, 1412.9115,      |
|             | H           | -0.36377249 | 2.15835477  | 0.79640322                       | 1483.7607, 1490.4613, 1493.9124,      |
|             | C           | -1.17035449 | 0.67877811  | -0.53351349                      | 1496.9686, 1502.3699, 1503.5683,      |
|             | H           | -0.86289722 | 0.12878371  | -1.42735028                      | 1503.5929, 1509.8923, 1515.3060,      |
|             | H           | -1.96214582 | 1.35947397  | -0.85746626                      | 3038.0906, 3039.4417, 3044.1310,      |
|             | C           | -1.74900929 | -0.30197786 | 0.48005555                       | 3049.5615, 3049.8013, 056.2222,       |
| H           | -0.99478410 | -1.04695343 | 0.74444673  |                                  |                                       |

|             |             |             |             |                                  |                                       |
|-------------|-------------|-------------|-------------|----------------------------------|---------------------------------------|
|             | H           | -1.98705132 | 0.23420899  | 1.40327369                       | 3066.3777, 3068.3110, 3080.1952,      |
|             | C           | -2.99284645 | -1.00761486 | -0.04453159                      | 3091.7589, 3092.4434, 3121.7510,      |
|             | H           | -2.76704779 | -1.55812890 | -0.95915889                      | 3122.1742, 3130.7479, 3130.7715       |
|             | H           | -3.77775860 | -0.28725392 | -0.27908783                      |                                       |
|             | H           | -3.39229419 | -1.71482746 | 0.68159524                       |                                       |
| n-heptane_6 | C           | -3.02418020 | -0.74939224 | 0.04408302                       | 65.4155, 103.3952, 115.0676,          |
|             | H           | -2.70793284 | -1.74507665 | -0.27088409                      | 187.9863, 217.3812, 253.8141,         |
|             | H           | -3.70583193 | -0.86569503 | 0.88596436                       | 286.6980, 314.6354, 362.5041,         |
|             | H           | -3.58204186 | -0.30467799 | -0.78120628                      | 433.1833, 533.9501, 715.1465,         |
|             | C           | -0.85089388 | 0.26886480  | -0.75916986                      | 748.9184, 795.1387, 841.1077,         |
|             | H           | -0.46802036 | -0.71647606 | -1.04224343                      | 878.4015, 891.8342, 949.6037,         |
|             | H           | -1.40358621 | 0.63718473  | -1.62756236                      | 961.6522, 1028.7779, 1054.3296,       |
|             | C           | -1.81913565 | 0.10844696  | 0.40768672                       | 1061.3612, 1073.4736,                 |
|             | H           | -2.15220671 | 1.09740476  | 0.73538826                       | 1124.5016, 169.9569, 1236.6082,       |
|             | H           | -1.30035019 | -0.33787058 | 1.25907093                       | 1253.8729, 1293.4377, 1316.5696,      |
|             | C           | 0.31113112  | 1.21819600  | -0.47404538                      | 1324.5487, 1338.4620, 1367.4433,      |
|             | H           | -0.08571518 | 2.22297252  | -0.30729275                      | 1384.6381, 1397.4540, 1408.5080,      |
|             | H           | 0.94326934  | 1.28533504  | -1.36212346                      | 1411.6154, 1415.9843, 1479.2889,      |
|             | C           | 1.16752511  | 0.82545738  | 0.73193189                       | 1490.8563, 1494.0291, 1500.4826,      |
|             | H           | 0.58667987  | 0.95176504  | 1.64812024                       | 1502.2589, 1503.2430, 1507.1153,      |
|             | H           | 2.00675105  | 1.52230109  | 0.80468734                       | 1513.3679, 1516.8938, 3038.6920,      |
|             | C           | 1.71409422  | -0.60052804 | 0.67869702                       | 3045.4849, 3049.2321, 3052.4374,      |
| H           | 2.31561485  | -0.77808764 | 1.57206886  | 3055.75983058.3740, 3069.6416,   |                                       |
| H           | 0.88792666  | -1.31466698 | 0.72320261  | 3078.5271, 3087.4090, 3092.3400, |                                       |
| C           | 2.55740399  | -0.87516450 | -0.56131254 | 3097.4477, 3122.8005, 3123.8017, |                                       |
| H           | 3.36351331  | -0.14436761 | -0.64993281 | 3130.9209, 3132.6590             |                                       |
| H           | 1.95954591  | -0.81845241 | -1.47137232 |                                  |                                       |
| H           | 3.00671606  | -1.86687440 | -0.52311033 |                                  |                                       |
| n-heptane_7 | C           | 2.79323884  | 0.47293152  | -0.08496967                      | 84.3264, 86.9908, 128.6339, 201.7410, |
|             | H           | 3.31996395  | -0.05702593 | 0.71093243                       | 208.3462, 262.1307, 323.6467,         |
|             | H           | 3.53271620  | 0.80571252  | -0.81247628                      | 337.5779, 388.3613, 441.7668,         |
|             | H           | 2.33950168  | 1.36168384  | 0.35438822                       | 535.2482, 710.4454, 750.4495,         |
|             | C           | 0.76570116  | -1.03043784 | 0.27282297                       | 804.6088, 833.3652, 879.6026,         |
|             | H           | 0.05640943  | -1.66876952 | -0.26004144                      | 886.8108, 951.7796, 963.6982,         |
|             | H           | 1.31657792  | -1.68719431 | 0.95134293                       | 1004.3447, 1050.9097, 1057.2076,      |
|             | C           | 1.74631010  | -0.42658897 | -0.73221940                      | 1077.1609, 1119.0662, 71.0941,        |
|             | H           | 1.19829857  | 0.13949773  | -1.48934835                      | 1222.3371, 1248.9535, 1291.4611,      |
|             | H           | 2.24590344  | -1.23852580 | -1.26389281                      | 1306.4067, 1332.8028, 1355.7753,      |
|             | C           | 0.00000000  | 0.00000001  | 1.10407580                       | 1373.1197, 1380.0933, 1400.1539,      |
|             | H           | 0.69421175  | 0.52568307  | 1.76306451                       | 1401.1038, 1414.1831, 1416.4248,      |
|             | H           | -0.69421177 | -0.52568303 | 1.76306451                       | 1478.0253, 1487.4772, 1496.4249,      |
|             | C           | -0.76570117 | 1.03043786  | 0.27282295                       | 1500.1015, 1501.1665, 1504.6633,      |
|             | H           | -0.05640944 | 1.66876953  | -0.26004147                      | 1512.2210, 1513.1102, 1521.5783,      |
|             | H           | -1.31657794 | 1.68719434  | 0.95134291                       | 3045.0523, 3046.9046, 3052.1358,      |
|             | C           | -1.74631011 | 0.42658896  | -0.73221941                      | 3054.6319, 3057.4078, 062.5229,       |
| H           | -2.24590345 | 1.23852577  | -1.26389284 | 3077.4040, 3081.7150, 3088.3930, |                                       |
| H           | -1.19829856 | -0.13949774 | -1.48934835 | 3094.1978, 3096.8158, 3123.1692, |                                       |
| C           | -2.79323882 | -0.47293154 | -0.08496966 | 3123.2233, 3131.7200, 3131.9324  |                                       |
| H           | -3.31996391 | 0.05702590  | 0.71093246  |                                  |                                       |
| H           | -2.33950164 | -1.36168386 | 0.35438820  |                                  |                                       |
| H           | -3.53271621 | -0.80571253 | -0.81247625 |                                  |                                       |
| n-heptane_8 | C           | -2.65408176 | 0.95715544  | 0.33038823                       | 45.7002, 82.9846, 139.3326, 168.5655, |
|             | H           | -2.21109508 | 1.81619916  | -0.17779926                      | 228.8863, 252.4399, 290.3701,         |
|             | H           | -3.73099182 | 1.11513138  | 0.37732873                       | 304.8146, 356.2635, 442.2512,         |
|             | H           | -2.27773224 | 0.94658111  | 1.35288858                       | 521.9545, 722.6030, 765.5719,         |
|             | C           | -0.81653462 | -0.52976326 | -0.62082945                      | 796.3330, 844.4369, 852.6081,         |
|             | H           | -0.64905889 | -1.43754582 | -1.20798910                      | 907.1586, 949.0614, 966.2624,         |
| H           | -0.43818638 | 0.30087357  | -1.22444787 |                                  |                                       |

|              |   |             |             |             |                                       |
|--------------|---|-------------|-------------|-------------|---------------------------------------|
|              | C | -2.31524563 | -0.33563510 | -0.40405765 | 1011.2153, 1045.7974, 1068.4446,      |
|              | H | -2.71075492 | -1.18759266 | 0.15536967  | 1093.0841, 1120.9785, 69.4539,        |
|              | H | -2.81854926 | -0.34165345 | -1.37274006 | 1231.8203, 1261.0905, 1295.8917,      |
|              | C | -0.01817111 | -0.62715281 | 0.67550462  | 1313.5599, 1326.1112, 1343.0434,      |
|              | H | -0.49382444 | -1.36331477 | 1.32999201  | 1376.2238, 1378.2257, 1389.3914,      |
|              | H | -0.06163921 | 0.32471892  | 1.20898638  | 1408.1144, 1414.3428, 1416.3499,      |
|              | C | 1.44204077  | -1.02337481 | 0.46140617  | 1479.5120, 1491.5603, 1493.2893,      |
|              | H | 1.47930534  | -2.03851513 | 0.05739920  | 1496.6515, 1500.5248, 1504.0821,      |
|              | H | 1.94677921  | -1.05531722 | 1.43071355  | 1508.7126, 1512.5735, 1518.4119,      |
|              | C | 2.21876820  | -0.09011258 | -0.46787752 | 3035.0203, 3041.7608, 3047.8283,      |
|              | H | 3.25233722  | -0.43632136 | -0.52541358 | 3049.9320, 3055.2738, 060.0481,       |
|              | H | 1.81837181  | -0.16247410 | -1.48138417 | 3069.6764, 3077.8544, 3086.1585,      |
|              | C | 2.19684847  | 1.36513945  | -0.01438120 | 3093.0589, 3099.2322, 3122.1347,      |
|              | H | 2.54151351  | 1.45487481  | 1.01760497  | 3123.7347, 3130.4805, 3136.3577       |
|              | H | 1.19057009  | 1.78329646  | -0.06321154 |                                       |
|              | H | 2.84120911  | 1.98352113  | -0.63821665 |                                       |
| n-heptane_9  | C | 3.49142583  | -0.37396817 | 0.04537676  | 50.6747, 79.2780, 116.6661, 131.1930, |
|              | H | 3.75320262  | 0.22182989  | 0.92114457  | 235.5808, 237.6986, 266.3067,         |
|              | H | 3.99463902  | -1.33629120 | 0.13301007  | 288.7343, 307.9119, 415.2727,         |
|              | H | 3.89214433  | 0.13612335  | -0.83174998 | 538.0276, 732.9040, 757.0375,         |
|              | C | 1.26308514  | 0.80602936  | -0.17328217 | 784.7206, 842.0819, 867.4427,         |
|              | H | 1.44322624  | 1.38135645  | 0.74054810  | 903.2473, 949.8096, 965.3166,         |
|              | H | 1.71113278  | 1.37863340  | -0.98993751 | 1038.9425, 1050.6038, 1070.4810,      |
|              | C | 1.98070884  | -0.53516505 | -0.06455028 | 1089.5629, 1117.7124, 15.0595,        |
|              | H | 1.73514791  | -1.14385424 | -0.93959978 | 1239.3231, 1268.3487, 1304.6432,      |
|              | H | 1.61023935  | -1.08164910 | 0.80488993  | 1307.3544, 1327.3083, 1335.3805,      |
|              | C | -0.24038938 | 0.68758343  | -0.40792245 | 1351.3917, 1378.9202, 1402.3834,      |
|              | H | -0.41091751 | 0.16788352  | -1.35455966 | 1405.4015, 1412.5298, 1416.1492,      |
|              | H | -0.66661203 | 1.68851424  | -0.52419646 | 1480.8632, 1488.5412, 1493.8863,      |
|              | C | -0.98050979 | -0.03355159 | 0.71603724  | 1497.3774, 1500.7379, 1503.7599,      |
|              | H | -0.64887217 | 0.37499817  | 1.67527719  | 1505.8392, 1512.1298, 1512.8604,      |
|              | H | -0.70555728 | -1.09181186 | 0.71891445  | 3031.4100, 3035.7552, 3043.0994,      |
|              | C | -2.49981839 | 0.08127137  | 0.61822950  | 3047.6198, 3048.0801, 57.8936,        |
|              | H | -2.95065046 | -0.40935479 | 1.48297438  | 3065.7907, 3068.0665, 3083.3937,      |
|              | H | -2.78339558 | 1.13548114  | 0.67794660  | 3092.7621, 3094.8031, 3122.9691,      |
|              | C | -3.06935893 | -0.52633050 | -0.65904714 | 3124.8279, 3131.6255, 3135.5969       |
|              | H | -2.75144938 | -1.56514961 | -0.76703760 |                                       |
|              | H | -2.73448570 | 0.01646227  | -1.54266253 |                                       |
|              | H | -4.15865210 | -0.50838477 | -0.65401052 |                                       |
| n-heptane_10 | C | 2.91067974  | -0.89965447 | -0.51846370 | 48.2400, 91.4131, 116.9476, 126.6666, |
|              | H | 3.03676668  | -0.39096143 | -1.47614336 | 168.2196, 252.6260, 287.9750,         |
|              | H | 3.85391289  | -1.38543884 | -0.27092934 | 306.6482, 319.9441, 460.0912,         |
|              | H | 2.16348359  | -1.68113552 | -0.65380066 | 469.9867, 731.9560, 749.2044,         |
|              | C | 1.24983818  | 0.89454222  | 0.21004326  | 787.3917, 841.4015, 877.5642,         |
|              | H | 1.05231636  | 1.61978962  | 1.00410512  | 907.2817, 953.7112, 970.4970,         |
|              | H | 1.44345722  | 1.47661653  | -0.69663243 | 1019.4530, 1036.4392, 1082.4694,      |
|              | C | 2.49656656  | 0.08873848  | 0.56621994  | 1102.1714, 1110.1090, 88.0474,        |
|              | H | 2.31946275  | -0.44936901 | 1.50130067  | 1232.5070, 1264.8701, 1301.5342,      |
|              | H | 3.32124258  | 0.77757536  | 0.75903153  | 1306.0281, 1329.8955, 1334.0907,      |
|              | C | -0.00000002 | 0.04647856  | -0.00000004 | 1377.9960, 1378.3464, 1381.9250,      |
|              | H | -0.13296105 | -0.60826971 | 0.86606261  | 1407.4238, 1415.7215, 1415.8932,      |
|              | H | 0.13296100  | -0.60826959 | -0.86606277 | 1481.6847, 1485.7356, 1493.3799,      |
|              | C | -1.24983822 | 0.89454225  | -0.21004321 | 1493.7380, 1504.1293, 1504.9782,      |
|              | H | -1.05231645 | 1.61978973  | -1.00410502 | 1507.5340, 1512.9179, 1512.9400,      |
|              | H | -1.44345724 | 1.47661647  | 0.69663254  | 3032.3849, 3033.1675, 3043.3610,      |
|              | C | -2.49656660 | 0.08873853  | -0.56621990 | 3047.0992, 3048.2344, 058.3979,       |
|              | H | -3.32124267 | 0.77757541  | -0.75903135 | 3062.7907, 3074.0095, 3084.0218,      |
|              | H | -2.31946283 | -0.44936884 | -1.50130071 |                                       |

|              |   |             |             |             |                                       |
|--------------|---|-------------|-------------|-------------|---------------------------------------|
|              | C | -2.91067965 | -0.89965457 | 0.51846365  | 3086.9087, 3095.3267, 3124.8111,      |
|              | H | -3.03676655 | -0.39096164 | 1.47614338  | 3124.8704, 3134.9030, 3134.9174       |
|              | H | -2.16348342 | -1.68113558 | 0.65380047  |                                       |
|              | H | -3.85391278 | -1.38543896 | 0.27092931  |                                       |
| n-heptane_11 | C | 2.77990735  | 1.15698942  | 0.10924149  | 46.1992, 79.7507, 103.5237, 140.3448, |
|              | H | 2.73530754  | 1.27326453  | 1.19378980  | 159.3452, 254.2583, 270.1238,         |
|              | H | 3.75375320  | 1.51281550  | -0.22542877 | 310.9461, 326.1643, 462.1947,         |
|              | H | 2.02413274  | 1.81018892  | -0.32585308 | 463.2305, 730.2555, 767.3079,         |
|              | C | 1.26796319  | -0.89371899 | 0.27262153  | 776.8507, 835.9782, 882.4899,         |
|              | H | 1.21949318  | -1.95404234 | 0.01090325  | 907.8160, 953.6946, 973.3874,         |
|              | H | 1.29436770  | -0.84786761 | 1.36619345  | 1019.1309, 1038.7273, 1082.9618,      |
|              | C | 2.55836022  | -0.29895734 | -0.28616570 | 1100.5513, 1110.3117, 194.3378,       |
|              | H | 2.54813142  | -0.38334107 | -1.37617192 | 1228.9870, 1265.0915, 1293.6120,      |
|              | H | 3.40298796  | -0.89733212 | 0.06069932  | 1319.9833, 1324.8041, 1335.9378,      |
|              | C | -0.00000000 | -0.20686493 | -0.22286553 | 1375.1363, 1379.3745, 1384.5679,      |
|              | H | -0.00000000 | -0.19397269 | -1.31867511 | 1408.6203, 1414.8814, 1416.2512,      |
|              | H | 0.00000000  | 0.83603352  | 0.09923635  | 1482.2678, 1486.5539, 1492.5544,      |
|              | C | -1.26796320 | -0.89371900 | 0.27262153  | 1493.1553, 1504.4326, 1504.5929,      |
|              | H | -1.29436771 | -0.84786763 | 1.36619345  | 1507.7093, 1511.6399, 1512.5271,      |
|              | H | -1.21949319 | -1.95404234 | 0.01090323  | 3027.4294, 3033.6909, 3041.9898,      |
|              | C | -2.55836023 | -0.29895734 | -0.28616569 | 3047.9896, 3048.4212, 3058.6511,      |
|              | H | -2.54813145 | -0.38334107 | -1.37617191 | 3070.8759, 3074.8946, 3085.2088,      |
|              | H | -3.40298797 | -0.89733210 | 0.06069934  | 3086.5990, 3102.9917, 3124.8988,      |
|              | C | -2.77990734 | 1.15698943  | 0.10924148  | 3125.3563, 3134.3096, 3135.8830       |
|              | H | -2.02413272 | 1.81018892  | -0.32585310 |                                       |
|              | H | -2.73530750 | 1.27326455  | 1.19378980  |                                       |
|              | H | -3.75375319 | 1.51281552  | -0.22542875 |                                       |
| n-heptane_12 | C | 3.57139086  | -0.13048493 | 0.16675540  | 30.4738, 72.1182, 103.5754, 124.5508, |
|              | H | 3.65645452  | 0.09686631  | 1.23050546  | 222.9483, 239.3816, 263.3539,         |
|              | H | 4.21837770  | -0.98080319 | -0.04620570 | 286.1815, 299.5320, 414.3094,         |
|              | H | 3.95356032  | 0.72928285  | -0.38537596 | 530.8903, 726.1077, 743.9291,         |
|              | C | 1.20517597  | 0.76240420  | 0.10044639  | 782.3816, 850.2523, 867.5151,         |
|              | H | 1.20488242  | 0.94018810  | 1.18074540  | 902.6125, 950.0972, 966.8642,         |
|              | H | 1.62748349  | 1.66153651  | -0.35654899 | 1041.7802, 1045.5941, 1072.7502,      |
|              | C | 2.12287756  | -0.41578861 | -0.20916661 | 1088.2976, 1117.3236, 193.4718,       |
|              | H | 2.05617469  | -0.65030445 | -1.27542761 | 1234.9542, 1271.8444, 1292.6572,      |
|              | H | 1.78058661  | -1.30427266 | 0.32423539  | 1314.7523, 1328.2832, 1340.0784,      |
|              | C | -0.23290120 | 0.58708529  | -0.38206668 | 1351.9034, 1379.5570, 1401.3690,      |
|              | H | -0.23411461 | 0.43500437  | -1.46668248 | 1408.1372, 1413.4574, 1416.1314,      |
|              | H | -0.77688456 | 1.51583458  | -0.20021347 | 1481.8705, 1486.5149, 1492.1121,      |
|              | C | -0.97076677 | -0.57125683 | 0.28195481  | 1497.1522, 1500.1886, 1503.8852,      |
|              | H | -0.95429413 | -0.42928271 | 1.36802522  | 1505.0572, 1512.1180, 1512.2728,      |
|              | H | -0.43710063 | -1.50257497 | 0.08357577  | 3029.1494, 3032.4217, 3039.7655,      |
|              | C | -2.41747924 | -0.72847514 | -0.18286623 | 3049.1343, 3049.9098, 3058.8997,      |
|              | H | -2.43005486 | -0.87801585 | -1.26591769 | 3067.3929, 3078.9882, 3085.9291,      |
|              | H | -2.83220329 | -1.63740333 | 0.25709822  | 3094.0436, 3101.6390, 3124.0997,      |
|              | C | -3.31185320 | 0.45246559  | 0.17907127  | 3125.5542, 3130.5509, 3135.4858       |
|              | H | -3.01079856 | 1.36141511  | -0.34051370 |                                       |
|              | H | -3.27023672 | 0.65288774  | 1.25132136  |                                       |
|              | H | -4.35049634 | 0.25394420  | -0.08339138 |                                       |
| n-heptane_13 | C | 3.15372559  | 0.24429929  | -0.22021536 | 38.2292, 77.4308, 123.4049, 172.5326, |
|              | H | 3.29946578  | 0.92711731  | 0.61891239  | 222.7190, 250.0980, 291.6882,         |
|              | H | 4.11697676  | -0.20813206 | -0.45368647 | 296.0979, 357.2535, 435.9524,         |
|              | H | 2.85268263  | 0.83759855  | -1.08284549 | 516.8753, 720.1570, 749.4141,         |
|              | C | 0.77886347  | -0.24484822 | 0.59086949  | 797.0698, 848.1419, 856.5827,         |
|              | H | 0.14090569  | -1.06872542 | 0.91900613  | 905.0603, 955.9748, 960.6134,         |
|              | H | 0.94278575  | 0.38701202  | 1.47062330  | 1012.2792, 1044.1083, 1070.7926,      |
|              | C | 2.11563559  | -0.81818282 | 0.12441481  |                                       |

|              |   |             |             |             |                                       |
|--------------|---|-------------|-------------|-------------|---------------------------------------|
|              | H | 1.94469803  | -1.45784776 | -0.74585957 | 1095.2473, 1120.9594, 177.6181,       |
|              | H | 2.51441192  | -1.46577134 | 0.90756542  | 1229.1559, 1261.8979, 1296.8049,      |
|              | C | 0.04936358  | 0.56389085  | -0.47633650 | 1306.9557, 1333.6219, 1341.3457,      |
|              | H | -0.12327319 | -0.07223965 | -1.34959287 | 1377.5521, 1379.7206, 1389.6674,      |
|              | H | 0.68804862  | 1.38034334  | -0.81811274 | 1409.2643, 1414.3591, 1416.1754,      |
|              | C | -1.27425697 | 1.16033280  | 0.00287725  | 1479.6720, 1489.6118, 1493.1039,      |
|              | H | -1.73145544 | 1.70966180  | -0.82453229 | 1496.7436, 1500.7798, 1504.1194,      |
|              | H | -1.06813054 | 1.89502252  | 0.78577809  | 1507.8028, 1512.3787, 1517.9016,      |
|              | C | -2.28419100 | 0.14152459  | 0.53177228  | 3030.3857, 3041.7272, 3046.1548,      |
|              | H | -1.91365128 | -0.30165569 | 1.45838725  | 3049.0191, 3056.05023060.2874,        |
|              | H | -3.20252834 | 0.66895036  | 0.79637658  | 3075.9628, 3078.4483, 3085.2608,      |
|              | C | -2.60531010 | -0.96249944 | -0.46889345 | 3094.0911, 3098.9575, 3122.4307,      |
|              | H | -1.73566669 | -1.59183028 | -0.66138932 | 3125.4715, 3131.1580, 3137.0038       |
|              | H | -2.92408103 | -0.53955949 | -1.42355737 |                                       |
|              | H | -3.40416965 | -1.60704654 | -0.10400413 |                                       |
| n-heptane_14 | C | 2.98024302  | -1.04415173 | 0.11716611  | 61.7372, 96.6732, 133.6846, 147.7377, |
|              | H | 3.19123350  | -0.92613179 | 1.18113745  | 217.0997, 247.6164, 250.4687,         |
|              | H | 3.11193358  | -2.09567739 | -0.13555365 | 284.5340, 319.2497, 425.6016,         |
|              | H | 3.72767480  | -0.47025019 | -0.43246647 | 497.9634, 731.1483, 750.8130,         |
|              | C | 1.37673341  | 0.91001477  | 0.15360354  | 795.6597, 857.8452, 876.8204,         |
|              | H | 1.52258141  | 1.02550031  | 1.23248116  | 892.9013, 950.0535, 977.1508,         |
|              | H | 2.16315250  | 1.49987997  | -0.32557901 | 1042.7988, 1064.2696, 1075.9805,      |
|              | C | 1.57462519  | -0.55676797 | -0.21086173 | 1081.4647, 1117.5754, 86.2306,        |
|              | H | 1.37304990  | -0.69505223 | -1.27689448 | 1244.8809, 1262.4511, 1289.0098,      |
|              | H | 0.84506483  | -1.16944644 | 0.32393598  | 1323.5793, 1330.8601, 1336.0384,      |
|              | C | 0.01540062  | 1.49052369  | -0.22685789 | 1337.5018, 1380.7615, 1397.6656,      |
|              | H | -0.09292513 | 1.47176139  | -1.31582772 | 1407.2938, 1411.5106, 1412.5421,      |
|              | H | 0.00322607  | 2.54279976  | 0.06117428  | 1484.1667, 1491.3238, 1496.5858,      |
|              | C | -1.17956992 | 0.76644722  | 0.40830214  | 1498.7051, 1499.4841, 1502.8293,      |
|              | H | -1.94954897 | 1.49081102  | 0.68406059  | 1504.0684, 1511.3389, 1516.3646,      |
|              | H | -0.86335286 | 0.29419483  | 1.34459911  | 3032.1341, 3032.4490, 3041.0805,      |
|              | C | -1.82379302 | -0.28389391 | -0.49311155 | 3046.6587, 3053.8015, 056.8834,       |
|              | H | -2.20922937 | 0.21285655  | -1.38717479 | 3064.7945, 3072.2131, 3087.4024,      |
|              | H | -1.06804282 | -0.99045749 | -0.84078832 | 3093.4129, 3098.3005, 3122.4747,      |
|              | C | -2.94990732 | -1.03474125 | 0.20459787  | 3123.1739, 3130.4983, 3131.7262       |
|              | H | -3.72174795 | -0.34397564 | 0.54774993  |                                       |
|              | H | -2.57494146 | -1.56967276 | 1.07857335  |                                       |
|              | H | -3.42051998 | -1.76172475 | -0.45645843 |                                       |
| n-heptane_15 | C | 2.77592844  | 0.77037155  | -0.01483612 | 61.7254, 82.8585, 140.3683, 196.5500, |
|              | H | 2.41153054  | 1.57476400  | -0.65651477 | 224.5368, 239.7364, 271.5629,         |
|              | H | 3.34536641  | 1.22215560  | 0.79662303  | 303.0585, 365.0541, 419.9716,         |
|              | H | 3.45982938  | 0.16124398  | -0.60776792 | 503.5075, 732.7903, 749.9134,         |
|              | C | 0.82937264  | -0.72659657 | -0.62065412 | 791.4233, 833.3047, 866.8877,         |
|              | H | 0.49025837  | 0.03752923  | -1.32615856 | 902.3895, 953.6710, 963.5622,         |
|              | H | 1.50724796  | -1.37176395 | -1.18621823 | 1043.2466, 1059.9605, 1065.0157,      |
|              | C | 1.61571306  | -0.06739959 | 0.50659882  | 1080.4004, 1128.8585, 76.7962,        |
|              | H | 1.98895150  | -0.84368897 | 1.18014101  | 1237.6938, 1252.6358, 1304.9683,      |
|              | H | 0.95431245  | 0.56309402  | 1.10420926  | 1305.9327, 1327.3832, 1339.9346,      |
|              | C | -0.36056692 | -1.55738312 | -0.14744034 | 1369.3779, 1387.9600, 1395.6362,      |
|              | H | 0.00335667  | -2.35064676 | 0.51162383  | 1406.6353, 1412.4468, 1414.5200,      |
|              | H | -0.80604881 | -2.05650559 | -1.01209386 | 1486.5348, 1488.2590, 1490.9577,      |
|              | C | -1.46437406 | -0.78264111 | 0.57665879  | 1498.1818, 1501.9081, 1503.4223,      |
|              | H | -1.08434844 | -0.37555577 | 1.51741711  | 1507.1467, 1510.2108, 1518.8953,      |
|              | H | -2.23822897 | -1.50047124 | 0.85411918  | 3038.4765, 3042.4363, 3046.7319,      |
|              | C | -2.09857376 | 0.34813726  | -0.24502366 | 3050.7876, 3052.7492, 060.8329,       |
|              | H | -2.07276254 | 0.07976902  | -1.30516007 | 3069.5937, 3078.1188, 3087.5280,      |
|              | H | -3.15414024 | 0.43118055  | 0.01884281  | 3092.0870, 3094.9554, 3119.5570,      |
|              | C | -1.45287579 | 1.71722773  | -0.04389754 |                                       |

|              |   |             |             |             |                                       |
|--------------|---|-------------|-------------|-------------|---------------------------------------|
|              | H | -0.40864940 | 1.73123591  | -0.35340482 | 3123.1040, 3130.9137, 3142.2765       |
|              | H | -1.48711137 | 2.00254871  | 1.00892670  |                                       |
|              | H | -1.97730520 | 2.48481433  | -0.61301968 |                                       |
| n-heptane_16 | C | 3.15267538  | 0.84214480  | 0.00033217  |                                       |
|              | H | 3.08456036  | 1.27292337  | 1.00034891  | 79.0140, 85.2244, 109.3674, 157.7777, |
|              | H | 4.19579508  | 0.58737076  | -0.18398178 | 183.7635, 218.8560, 249.7863,         |
|              | H | 2.86585999  | 1.61658271  | -0.71252564 | 302.9165, 371.6344, 402.3542,         |
|              | C | 0.77935864  | -0.04182501 | 0.12886434  | 475.5259, 738.0350, 757.1710,         |
|              | H | 0.67312443  | 0.37619934  | 1.13561813  | 788.6304, 833.9017, 870.5440,         |
|              | H | 0.46890388  | 0.74404734  | -0.56571338 | 925.8633, 952.4228, 980.3887,         |
|              | C | 2.24438495  | -0.37370358 | -0.12740984 | 1043.2700, 1049.5760, 1073.0219,      |
|              | H | 2.34318935  | -0.80533916 | -1.12694799 | 1091.4487, 1122.4065, 11.4009,        |
|              | H | 2.56381965  | -1.14896808 | 0.57374784  | 1240.2901, 1263.2407, 1292.0734,      |
|              | C | -0.13316744 | -1.25320392 | -0.01981512 | 1311.1592, 1327.5027, 1333.6042,      |
|              | H | 0.25112815  | -2.06202805 | 0.60790443  | 1366.5797, 1379.1209, 1388.9308,      |
|              | H | -0.07316606 | -1.61286358 | -1.05195240 | 1409.7115, 1412.8725, 1413.8478,      |
|              | C | -1.59948862 | -1.00614455 | 0.33232767  | 1483.8791, 1489.1678, 1493.5097,      |
|              | H | -1.67768274 | -0.74881830 | 1.39319027  | 1498.7381, 1502.1266, 1502.9493,      |
|              | H | -2.13889375 | -1.94644707 | 0.20709104  | 1504.8846, 1511.3895, 1514.2960,      |
|              | C | -2.27829714 | 0.09030734  | -0.50133484 | 3028.0645, 3036.3858, 3039.9862,      |
|              | H | -1.79261075 | 0.15031319  | -1.47948416 | 3048.1562, 3049.0659, 39.9491,        |
|              | H | -3.31439507 | -0.19017603 | -0.69660438 | 3062.2315, 3073.5189, 3083.8821,      |
|              | C | -2.27049428 | 1.46320041  | 0.16547591  | 3091.7413, 3094.2116, 3122.7405,      |
|              | H | -1.25872487 | 1.79596701  | 0.39333010  | 3125.3511, 3131.5730, 3141.2729       |
|              | H | -2.82381356 | 1.43042666  | 1.10510019  |                                       |
|              | H | -2.73692295 | 2.21615690  | -0.46976287 |                                       |
| n-heptane_17 | C | 2.92333201  | -0.67914245 | 0.28210137  |                                       |
|              | H | 2.86809686  | -0.65380493 | 1.37149725  | 61.4477, 100.0299, 108.9866,          |
|              | H | 3.31599269  | -1.65235305 | -0.01051065 | 186.8973, 214.7815, 247.0968,         |
|              | H | 3.64202839  | 0.08060573  | -0.02892593 | 269.9209, 299.5119, 369.0351,         |
|              | C | 1.00575097  | 0.95656726  | 0.05149577  | 418.4861, 499.9921, 727.7814,         |
|              | H | 0.94390143  | 1.02574829  | 1.14291604  | 749.5457, 788.2692, 857.4576,         |
|              | H | 1.74056563  | 1.70535494  | -0.25456946 | 873.8932, 881.9485, 951.2867,         |
|              | C | 1.55583206  | -0.41474299 | -0.33423989 | 965.6985, 1030.0310, 1060.8259,       |
|              | H | 1.62517360  | -0.47120332 | -1.42398389 | 1073.4278, 1080.1749,                 |
|              | H | 0.86176099  | -1.20027870 | -0.03201841 | 1124.2672, 180.2597, 1232.6356,       |
|              | C | -0.35930921 | 1.30085706  | -0.55890478 | 1263.5343, 1283.8255, 1317.0022,      |
|              | H | -0.46305705 | 0.79412709  | -1.52225937 | 1331.4684, 1336.6860, 1365.3820,      |
|              | H | -0.39540210 | 2.36890604  | -0.77956308 | 1390.4993, 1395.3106, 1400.2511,      |
|              | C | -1.55637549 | 0.97628684  | 0.33712830  | 1411.1030, 1415.7343, 1483.3640,      |
|              | H | -2.47086917 | 1.30770872  | -0.16299549 | 1485.3454, 1495.7584, 1497.8901,      |
|              | H | -1.47105483 | 1.57147089  | 1.25021222  | 1498.6228, 1502.8270, 1507.2365,      |
|              | C | -1.71644222 | -0.49364280 | 0.71950472  | 1512.3813, 1519.3696, 3031.2630,      |
|              | H | -0.83292835 | -0.82992428 | 1.26735355  | 3039.4216, 3049.8199, 3052.4711,      |
|              | H | -2.55195607 | -0.58130119 | 1.41688666  | 3056.04493059.7759, 3070.4831,        |
|              | C | -1.96899824 | -1.40472879 | -0.47617831 | 3078.5778, 3088.6999, 3093.8483,      |
|              | H | -1.13029428 | -1.39888609 | -1.17240132 | 3101.2966, 3123.6437, 3125.7269,      |
|              | H | -2.85449155 | -1.07934111 | -1.02514315 | 3131.4718, 3134.5292                  |
|              | H | -2.13020549 | -2.43555383 | -0.16193802 |                                       |
| n-heptane_18 | C | -2.56561943 | 0.26199431  | -0.72116511 |                                       |
|              | H | -3.28814228 | -0.31907709 | -0.14479778 | 71.9836, 103.7450, 118.1654,          |
|              | H | -3.11108270 | 1.03552090  | -1.26052715 | 199.7149, 214.5738, 254.2087,         |
|              | H | -2.12111391 | -0.40421257 | -1.46104610 | 290.8929, 359.8657, 370.0316,         |
|              | C | -0.82115327 | -0.16306229 | 1.08805431  | 442.2801, 504.4240, 726.5168,         |
|              | H | -0.08438704 | 0.33465138  | 1.72242899  | 746.1389, 794.2826, 830.4629,         |
|              | H | -1.56843952 | -0.58302787 | 1.76714040  | 865.8745, 899.2061, 955.9649,         |
|              | C | -1.50524431 | 0.86844647  | 0.19139345  | 960.3623, 1017.1697, 1054.8431,       |
|              | H | -0.76067673 | 1.38706426  | -0.41605687 | 1063.2809, 1089.9015,                 |



|              |            |             |             |                                  |                                       |
|--------------|------------|-------------|-------------|----------------------------------|---------------------------------------|
|              | H          | -1.96447267 | 1.63039572  | 0.82424653                       | 1129.0309,168.7715, 1232.7266,        |
|              | C          | -0.15526695 | -1.31547913 | 0.33634852                       | 1247.2109, 1294.9929, 1310.6171,      |
|              | H          | -0.92459640 | -1.90173892 | -0.17141294                      | 1331.9467, 1364.8156, 1373.4298,      |
|              | H          | 0.30225469  | -1.98857096 | 1.06624220                       | 1382.3459, 1398.6574, 1402.4619,      |
|              | C          | 0.91122165  | -0.91664347 | -0.68495934                      | 1414.1914, 1416.0025, 1483.1395,      |
|              | H          | 0.47054455  | -0.28233687 | -1.46023279                      | 1486.6809, 1490.9583, 1499.5717,      |
|              | H          | 1.23248999  | -1.82811353 | -1.19230109                      | 1500.9301, 1508.5383, 1511.1910,      |
|              | C          | 2.14486764  | -0.21832968 | -0.09675256                      | 1512.4210, 1518.1796, 3042.0895,      |
|              | H          | 2.34480450  | -0.62549583 | 0.89864654                       | 3044.2741, 3047.0401, 3051.4035,      |
|              | H          | 3.01470667  | -0.47100774 | -0.70553235                      | 3056.05383061.5357, 3076.4267,        |
|              | C          | 2.05148377  | 1.30354315  | -0.02031711                      | 3083.5220, 3089.3260, 3092.1509,      |
|              | H          | 1.26358603  | 1.63687954  | 0.65266152                       | 3096.4551, 3122.4491, 3123.4205,      |
|              | H          | 1.84315934  | 1.72310081  | -1.00613685                      | 3131.1175, 3147.7571                  |
|              | H          | 2.98963088  | 1.73315255  | 0.33106477                       |                                       |
| n-heptane_19 | C          | -3.10539448 | -0.26223023 | -0.32801618                      |                                       |
|              | H          | -3.34875923 | -0.85449373 | 0.55625186                       | 48.0645, 89.6559, 137.2616, 145.9797, |
|              | H          | -4.03014277 | 0.17516451  | -0.70270502                      | 230.4119, 263.9136, 304.4203,         |
|              | H          | -2.73052998 | -0.94399682 | -1.09096344                      | 319.8097, 327.3623, 431.0646,         |
|              | C          | -0.81520974 | 0.26817521  | 0.66379219                       | 499.4224, 731.5702, 768.6361,         |
|              | H          | -0.15438596 | 1.09889411  | 0.91744587                       | 794.4029, 830.5752, 876.2888,         |
|              | H          | -1.07579630 | -0.21378202 | 1.61150637                       | 909.8092, 948.3791, 961.8159,         |
|              | C          | -2.08123008 | 0.81563771  | 0.01057957                       | 1015.8148, 1065.2050, 1071.3247,      |
|              | H          | -1.80643059 | 1.35540991  | -0.90014225                      | 1097.2396, 1119.3662,183.9961,        |
|              | H          | -2.53723054 | 1.54956356  | 0.67777220                       | 1236.9596, 1255.1911, 1296.0564,      |
|              | C          | -0.06029065 | -0.73908204 | -0.20291548                      | 1313.5221, 1324.3919, 1342.2923,      |
|              | H          | 0.03871891  | -0.33964646 | -1.21877652                      | 1378.1266, 1380.4599, 1383.5064,      |
|              | H          | -0.66238685 | -1.64412587 | -0.29358419                      | 1400.4160, 1414.3171, 1415.6478,      |
|              | C          | 1.32985706  | -1.09804617 | 0.34102558                       | 1484.7697, 1489.4009, 1492.4578,      |
|              | H          | 1.52601518  | -2.15978744 | 0.18416512                       | 1494.2153, 1503.7066, 1504.8714,      |
|              | H          | 1.34151976  | -0.94187846 | 1.42436233                       | 1509.2529, 1512.1046, 1516.7503,      |
|              | C          | 2.47115673  | -0.30453514 | -0.29524275                      | 3027.1998, 3038.2345, 3042.8055,      |
| H            | 3.41769765 | -0.63904764 | 0.13418773  | 3047.9874, 3048.17343057.5978,   |                                       |
| H            | 2.51360325 | -0.54793799 | -1.36026070 | 3079.8998, 3084.4165, 3087.1394, |                                       |
| C            | 2.35175054 | 1.20629066  | -0.13339524 | 3092.1435, 3106.0671, 3122.8457, |                                       |
| H            | 2.29181016 | 1.48316322  | 0.92068347  | 3124.2474, 3128.5507, 3134.8384  |                                       |
| H            | 1.45942695 | 1.59017885  | -0.62951607 |                                  |                                       |
| H            | 3.21303416 | 1.71506230  | -0.56539300 |                                  |                                       |
| n-heptane_20 | C          | -1.64861486 | 1.53573628  | -0.25858636                      |                                       |
|              | H          | -2.26156186 | 1.47865692  | -1.16002731                      | 59.7882, 106.9134, 148.6576,          |
|              | H          | -1.94342260 | 2.42941573  | 0.29068873                       | 190.5732, 224.4284, 263.6651,         |
|              | H          | -0.61317051 | 1.66878767  | -0.57375968                      | 281.7646, 314.7551, 392.9230,         |
|              | C          | -1.50922583 | -1.00859106 | -0.16749486                      | 423.1864, 484.6736, 737.0606,         |
|              | H          | -1.70438722 | -1.86012877 | 0.48992008                       | 756.8050, 789.5519, 836.1299,         |
|              | H          | -2.20750249 | -1.09870714 | -1.00453840                      | 874.7021, 878.6991, 944.5837,         |
|              | C          | -1.82331059 | 0.28079074  | 0.58885366                       | 963.9747, 1004.9242, 1055.4025,       |
|              | H          | -1.20143195 | 0.34442721  | 1.48449679                       | 1073.6461, 1084.0541, 1134.0899,      |
|              | H          | -2.85465694 | 0.23047124  | 0.94379354                       | 69.5404, 1220.4690, 1263.9836,        |
|              | C          | -0.08252688 | -1.13274135 | -0.70663220                      | 1284.2443, 1315.6103, 1329.8186,      |
|              | H          | 0.10349370  | -0.35260105 | -1.44778146                      | 1356.4916, 1375.4649, 1390.0306,      |
|              | H          | -0.02121237 | -2.07534433 | -1.25313323                      | 1393.5726, 1399.6202, 1412.2900,      |
|              | C          | 1.01177367  | -1.11215413 | 0.36966621                       | 1416.2581, 1482.9138, 1486.6009,      |
|              | H          | 1.84093612  | -1.74719847 | 0.04708070                       | 1488.6857, 1496.5272, 1501.0960,      |
|              | H          | 0.61581460  | -1.57114405 | 1.28027897                       | 1503.9495, 1508.8741, 1513.2446,      |
|              | C          | 1.59515926  | 0.26242956  | 0.70928794                       | 1519.2588, 3038.1048, 3038.8071,      |
| H            | 0.80776510 | 0.94362050  | 1.03372959  | 3054.7714, 3057.0711,            |                                       |
| H            | 2.26817660 | 0.14818760  | 1.56164573  | 3059.5483,067.2535, 3074.2405,   |                                       |
| C            | 2.36715093 | 0.89166491  | -0.44528249 | 3079.6626, 3090.3743, 3098.6247, |                                       |
| H            | 1.72325355 | 1.09333691  | -1.30174172 | 3105.8915, 3123.8629, 3128.1999, |                                       |

|              |             |             |             |             |                                                                                                                                                                                                                                                                                                                                                                                                                                                                                                                                                                                                                                                                       |
|--------------|-------------|-------------|-------------|-------------|-----------------------------------------------------------------------------------------------------------------------------------------------------------------------------------------------------------------------------------------------------------------------------------------------------------------------------------------------------------------------------------------------------------------------------------------------------------------------------------------------------------------------------------------------------------------------------------------------------------------------------------------------------------------------|
|              | H           | 3.16569537  | 0.22853855  | -0.78242056 | 3131.4017, 3132.8904                                                                                                                                                                                                                                                                                                                                                                                                                                                                                                                                                                                                                                                  |
|              | H           | 2.81977667  | 1.83687182  | -0.14710326 |                                                                                                                                                                                                                                                                                                                                                                                                                                                                                                                                                                                                                                                                       |
| n-heptane_21 | C           | -2.91505683 | 0.05894907  | 0.76898009  | 59.1247, 90.1143, 128.2289, 149.1372, 220.6330, 223.1210, 264.0476, 303.8874, 376.2122, 411.5692, 508.7986, 741.6304, 772.4701, 788.8177, 825.1908, 866.5860, 914.3820, 954.4301, 972.5420, 1025.2638, 1050.7330, 1073.6209, 1094.6903, 1121.9241, 183.4289, 1233.1134, 1263.1998, 1296.6923, 1310.1238, 1329.7552, 1347.4719, 1368.8691, 1377.2544, 1387.5717, 1408.2382, 1413.1420, 1416.1463, 1482.2784, 1491.5856, 1493.6420, 1498.0554, 1502.0475, 1504.2032, 1508.6790, 1512.0768, 1513.2436, 3033.3383, 3038.7461, 3042.4128, 3047.1581, 3047.96773062.3600, 3067.7790, 3080.8177, 3085.1076, 3091.7523, 3095.6854, 3124.8082, 3124.9767, 3136.5039, 3144.0685 |
|              | H           | -2.53852888 | 0.64555559  | 1.60926261  |                                                                                                                                                                                                                                                                                                                                                                                                                                                                                                                                                                                                                                                                       |
|              | H           | -3.99365962 | 0.20312970  | 0.71689116  |                                                                                                                                                                                                                                                                                                                                                                                                                                                                                                                                                                                                                                                                       |
|              | H           | -2.73360079 | -0.99234030 | 0.99054794  |                                                                                                                                                                                                                                                                                                                                                                                                                                                                                                                                                                                                                                                                       |
|              | C           | -0.71282046 | 0.43032381  | -0.46474463 |                                                                                                                                                                                                                                                                                                                                                                                                                                                                                                                                                                                                                                                                       |
|              | H           | -0.29943973 | 0.80302009  | -1.40633496 |                                                                                                                                                                                                                                                                                                                                                                                                                                                                                                                                                                                                                                                                       |
|              | H           | -0.36924410 | 1.11320495  | 0.31794523  |                                                                                                                                                                                                                                                                                                                                                                                                                                                                                                                                                                                                                                                                       |
|              | C           | -2.23777726 | 0.48254678  | -0.52990387 |                                                                                                                                                                                                                                                                                                                                                                                                                                                                                                                                                                                                                                                                       |
|              | H           | -2.58279016 | -0.15742733 | -1.34643342 |                                                                                                                                                                                                                                                                                                                                                                                                                                                                                                                                                                                                                                                                       |
|              | H           | -2.54757631 | 1.49846378  | -0.78218918 |                                                                                                                                                                                                                                                                                                                                                                                                                                                                                                                                                                                                                                                                       |
|              | C           | -0.16327118 | -0.96808130 | -0.20045972 |                                                                                                                                                                                                                                                                                                                                                                                                                                                                                                                                                                                                                                                                       |
|              | H           | -0.63950064 | -1.66857051 | -0.89342737 |                                                                                                                                                                                                                                                                                                                                                                                                                                                                                                                                                                                                                                                                       |
|              | H           | -0.45017675 | -1.28743613 | 0.80491463  |                                                                                                                                                                                                                                                                                                                                                                                                                                                                                                                                                                                                                                                                       |
|              | C           | 1.35436189  | -1.09209001 | -0.33140074 |                                                                                                                                                                                                                                                                                                                                                                                                                                                                                                                                                                                                                                                                       |
|              | H           | 1.64924346  | -0.86371691 | -1.36035922 |                                                                                                                                                                                                                                                                                                                                                                                                                                                                                                                                                                                                                                                                       |
|              | H           | 1.62271677  | -2.13617075 | -0.16182199 |                                                                                                                                                                                                                                                                                                                                                                                                                                                                                                                                                                                                                                                                       |
|              | C           | 2.15059157  | -0.19782115 | 0.63012770  |                                                                                                                                                                                                                                                                                                                                                                                                                                                                                                                                                                                                                                                                       |
| H            | 1.56109207  | -0.03197461 | 1.53643394  |             |                                                                                                                                                                                                                                                                                                                                                                                                                                                                                                                                                                                                                                                                       |
| H            | 3.05247640  | -0.72231483 | 0.94938592  |             |                                                                                                                                                                                                                                                                                                                                                                                                                                                                                                                                                                                                                                                                       |
| C            | 2.56421251  | 1.14310126  | 0.02966492  |             |                                                                                                                                                                                                                                                                                                                                                                                                                                                                                                                                                                                                                                                                       |
| H            | 1.70335900  | 1.71964040  | -0.30565321 |             |                                                                                                                                                                                                                                                                                                                                                                                                                                                                                                                                                                                                                                                                       |
| H            | 3.21157923  | 0.98738925  | -0.83452868 |             |                                                                                                                                                                                                                                                                                                                                                                                                                                                                                                                                                                                                                                                                       |
| H            | 3.11260868  | 1.74797688  | 0.75178410  |             |                                                                                                                                                                                                                                                                                                                                                                                                                                                                                                                                                                                                                                                                       |
| n-heptane_22 | C           | 1.71267989  | -1.41767191 | 0.39573390  | 56.7841, 87.0850, 129.1305, 200.9512, 217.7685, 266.8160, 269.2875, 356.8340, 368.1777, 414.7378, 481.2567, 728.2697, 758.0232, 792.0923, 819.9548, 838.2553, 908.7930, 950.9689, 965.1656, 1034.0274, 1061.8310, 1063.5374, 1096.5417, 1137.4634, 178.8738, 1235.9703, 1236.6227, 1306.4313, 1319.1182, 1329.5719, 1364.7285, 1378.5455, 1385.4942, 1394.2637, 1403.8675, 1413.3922, 1415.3126, 1484.2523, 1484.5032, 1490.0112, 1496.7773, 1498.4849, 1503.5648, 1506.6127, 1515.1539, 1520.2390, 3035.0795, 3045.7949, 3045.9820, 3051.3925, 3056.22873063.8787, 3071.0364, 3085.7763, 3086.2061, 3091.9664, 3092.0695, 3123.1814, 3123.4369, 3153.6297, 3154.8570 |
|              | H           | 1.54801812  | -2.00489288 | -0.50919364 |                                                                                                                                                                                                                                                                                                                                                                                                                                                                                                                                                                                                                                                                       |
|              | H           | 2.51576468  | -1.89388545 | 0.95836820  |                                                                                                                                                                                                                                                                                                                                                                                                                                                                                                                                                                                                                                                                       |
|              | H           | 0.80584613  | -1.47954598 | 0.99388594  |                                                                                                                                                                                                                                                                                                                                                                                                                                                                                                                                                                                                                                                                       |
|              | C           | 1.04189995  | 0.77769055  | -0.80020730 |                                                                                                                                                                                                                                                                                                                                                                                                                                                                                                                                                                                                                                                                       |
|              | H           | 1.57133871  | 1.50072935  | -1.42391900 |                                                                                                                                                                                                                                                                                                                                                                                                                                                                                                                                                                                                                                                                       |
|              | H           | 0.55368472  | 0.09027803  | -1.49537785 |                                                                                                                                                                                                                                                                                                                                                                                                                                                                                                                                                                                                                                                                       |
|              | C           | 2.07767288  | 0.02114704  | 0.04332076  |                                                                                                                                                                                                                                                                                                                                                                                                                                                                                                                                                                                                                                                                       |
|              | H           | 2.26762036  | 0.58678198  | 0.95987180  |                                                                                                                                                                                                                                                                                                                                                                                                                                                                                                                                                                                                                                                                       |
|              | H           | 3.02464831  | 0.00304998  | -0.49914901 |                                                                                                                                                                                                                                                                                                                                                                                                                                                                                                                                                                                                                                                                       |
|              | C           | 0.00000608  | 1.56297660  | 0.00000146  |                                                                                                                                                                                                                                                                                                                                                                                                                                                                                                                                                                                                                                                                       |
|              | H           | -0.53969297 | 2.22147541  | -0.68659002 |                                                                                                                                                                                                                                                                                                                                                                                                                                                                                                                                                                                                                                                                       |
|              | H           | 0.53970849  | 2.22146919  | 0.68659622  |                                                                                                                                                                                                                                                                                                                                                                                                                                                                                                                                                                                                                                                                       |
|              | C           | -1.04189104 | 0.77769155  | 0.80020730  |                                                                                                                                                                                                                                                                                                                                                                                                                                                                                                                                                                                                                                                                       |
|              | H           | -1.57132415 | 1.50073049  | 1.42392363  |                                                                                                                                                                                                                                                                                                                                                                                                                                                                                                                                                                                                                                                                       |
|              | H           | -0.55367893 | 0.09027224  | 1.49537355  |                                                                                                                                                                                                                                                                                                                                                                                                                                                                                                                                                                                                                                                                       |
|              | C           | -2.07767121 | 0.02115922  | -0.04332204 |                                                                                                                                                                                                                                                                                                                                                                                                                                                                                                                                                                                                                                                                       |
| H            | -3.02464695 | 0.00307205  | 0.49914747  |             |                                                                                                                                                                                                                                                                                                                                                                                                                                                                                                                                                                                                                                                                       |
| H            | -2.26761257 | 0.58679658  | -0.95987289 |             |                                                                                                                                                                                                                                                                                                                                                                                                                                                                                                                                                                                                                                                                       |
| C            | -1.71269454 | -1.41766412 | -0.39573453 |             |                                                                                                                                                                                                                                                                                                                                                                                                                                                                                                                                                                                                                                                                       |
| H            | -1.54803923 | -2.00488644 | 0.50919332  |             |                                                                                                                                                                                                                                                                                                                                                                                                                                                                                                                                                                                                                                                                       |
| H            | -0.80586185 | -1.47954926 | -0.99388679 |             |                                                                                                                                                                                                                                                                                                                                                                                                                                                                                                                                                                                                                                                                       |
| H            | -2.51578498 | -1.89386890 | -0.95836820 |             |                                                                                                                                                                                                                                                                                                                                                                                                                                                                                                                                                                                                                                                                       |
| SP1_1        | C           | 3.23890267  | -0.68534176 | 0.34260416  | 692.6573i, 42.9901, 48.2636, 74.9928, 98.6893, 106.6981, 110.2320, 148.7313, 165.0273, 246.8542, 248.3562, 308.9079, 321.6261, 422.0942, 489.0034, 723.0002, 729.0589, 763.7419, 801.0695, 848.4981, 892.1520, 918.9155, 942.8630, 1018.2534, 1026.2624, 1063.3114, 1082.1384, 1090.1996,                                                                                                                                                                                                                                                                                                                                                                             |
|              | H           | 4.07849045  | -1.27645412 | -0.01910354 |                                                                                                                                                                                                                                                                                                                                                                                                                                                                                                                                                                                                                                                                       |
|              | H           | 3.46371150  | 0.39122311  | -0.03475839 |                                                                                                                                                                                                                                                                                                                                                                                                                                                                                                                                                                                                                                                                       |
|              | H           | 3.25700789  | -0.63766277 | 1.43136590  |                                                                                                                                                                                                                                                                                                                                                                                                                                                                                                                                                                                                                                                                       |
|              | C           | 0.75084052  | -0.23528868 | 0.27313834  |                                                                                                                                                                                                                                                                                                                                                                                                                                                                                                                                                                                                                                                                       |
|              | H           | 0.72974664  | -0.23422952 | 1.36792018  |                                                                                                                                                                                                                                                                                                                                                                                                                                                                                                                                                                                                                                                                       |
|              | H           | 0.94491258  | 0.79535242  | -0.03781423 |                                                                                                                                                                                                                                                                                                                                                                                                                                                                                                                                                                                                                                                                       |
|              | C           | 1.89734200  | -1.11628483 | -0.20647071 |                                                                                                                                                                                                                                                                                                                                                                                                                                                                                                                                                                                                                                                                       |
|              | H           | 1.92816386  | -1.11052266 | -1.29830229 |                                                                                                                                                                                                                                                                                                                                                                                                                                                                                                                                                                                                                                                                       |
| H            | 1.70635081  | -2.15286430 | 0.09150997  |             |                                                                                                                                                                                                                                                                                                                                                                                                                                                                                                                                                                                                                                                                       |

|       |   |             |             |             |                                       |
|-------|---|-------------|-------------|-------------|---------------------------------------|
|       | C | -0.60643178 | -0.67789209 | -0.25680023 | 1097.0727, 1154.6258, 1188.9397,      |
|       | H | -0.79701261 | -1.71111039 | 0.05006641  | 1218.8813, 1243.3380, 1262.3618,      |
|       | H | -0.58167066 | -0.68291648 | -1.35080424 | 1284.8658, 1312.7509, 1326.8170,      |
|       | C | -1.75186515 | 0.20719631  | 0.21615681  | 1332.9397, 1339.4754, 1360.8694,      |
|       | H | -1.56214129 | 1.24005086  | -0.09231451 | 1375.4538, 1404.6649, 1410.4806,      |
|       | H | -1.77633257 | 0.21478655  | 1.31057167  | 1414.7878, 1457.6082, 1479.8576,      |
|       | C | -3.11080764 | -0.23331258 | -0.31291899 | 1486.5462, 1488.8115, 1497.6648,      |
|       | H | -3.08419020 | -0.24026488 | -1.40558302 | 1503.1966, 1507.5081, 1514.6819,      |
|       | H | -3.29798698 | -1.26506634 | -0.00426065 | 1517.6546, 3029.6154, 3029.9062,      |
|       | C | -4.24512613 | 0.66179779  | 0.16841375  | 3033.5613, 3040.3118, 3049.6395,      |
|       | H | -4.08833694 | 1.69227273  | -0.15354254 | 3054.6736, 3057.2941, 3064.5334,      |
|       | H | -4.30291448 | 0.66177637  | 1.25785690  | 3075.4626, 3084.1945, 3090.0615,      |
|       | H | -5.20931772 | 0.33332944  | -0.21797793 | 3096.9700, 3123.6630, 3131.3341,      |
|       | O | 3.54101053  | 1.79253168  | -0.34424252 | 3152.5087, 3785.5297                  |
|       | H | 3.22630841  | 2.11680153  | 0.51437167  |                                       |
|       | C | -3.20384834 | -0.71124279 | 0.39244880  |                                       |
|       | H | -3.19656215 | -0.86345989 | 1.47191921  | 706.0480i, 39.6019, 42.6791, 73.9573, |
|       | H | -3.37912406 | 0.42986840  | 0.26632779  | 96.1177, 107.4551, 113.0274,          |
|       | H | -4.06220349 | -1.21272664 | -0.05078431 | 147.9285, 157.9762, 247.3000,         |
|       | C | -0.71661429 | -0.27826176 | 0.33270885  | 250.1244, 307.8366, 326.4572,         |
|       | H | -0.92007479 | 0.79269313  | 0.24692339  | 423.1538, 488.2515, 720.5743,         |
|       | H | -0.65175995 | -0.49712323 | 1.40314842  | 728.9149, 764.7862, 783.7547,         |
|       | C | -1.88543853 | -1.04969967 | -0.26690825 | 838.3713, 898.4899, 925.7202,         |
|       | H | -1.70079379 | -2.12514652 | -0.17260589 | 930.9329, 1016.4198, 1025.1617,       |
|       | H | -1.94721585 | -0.84024941 | -1.33757730 | 1064.1791, 1087.7238, 1089.0295,      |
|       | C | 0.61491724  | -0.60153224 | -0.33130299 | 1100.7371, 1157.3533, 1174.0492,      |
|       | H | 0.54782582  | -0.37967764 | -1.40093355 | 1224.0208, 1257.4690, 1280.0958,      |
|       | H | 0.80983247  | -1.67592413 | -0.25308295 | 1295.9302, 1315.6604, 1327.7916,      |
|       | C | 1.78487085  | 0.16697520  | 0.26850350  | 1331.7801, 1342.1260, 1363.3527,      |
|       | H | 1.85401246  | -0.05498512 | 1.33814175  | 1371.7642, 1404.4723, 1410.5707,      |
|       | H | 1.58905821  | 1.24096442  | 0.19199617  | 1415.2530, 1453.6865, 1479.7540,      |
|       | C | 3.11793052  | -0.15002516 | -0.39713523 | 1486.0256, 1488.6765, 1497.1449,      |
|       | H | 3.31047850  | -1.22335217 | -0.32067909 | 1503.8117, 1506.6705, 1514.2788,      |
|       | H | 3.04690077  | 0.07335168  | -1.46477777 | 1523.4368, 3029.8068, 3032.3729,      |
|       | C | 4.27728379  | 0.62550135  | 0.21458219  | 3035.0034, 3042.7442, 3049.6570,      |
|       | H | 4.37948716  | 0.39565199  | 1.27614677  | 3055.1178, 3057.9626, 3066.2835,      |
|       | H | 4.11425677  | 1.70037889  | 0.12432006  | 3073.2748, 3085.0382, 3089.4797,      |
|       | H | 5.22265202  | 0.38797595  | -0.27205388 | 3097.5942, 3124.1638, 3132.0359,      |
|       | O | -3.57829009 | 1.78175299  | -0.19286998 | 3151.9915, 3787.3677                  |
|       | H | -4.32505691 | 1.58744681  | -0.78085026 |                                       |
| SP1_2 | C | -2.51791135 | 0.78438528  | 0.08710137  |                                       |
|       | H | -3.15365126 | 1.41262509  | 0.70777406  | 770.0318i, 50.1400, 58.3739, 74.1082, |
|       | H | -1.60414835 | 1.47609965  | -0.13836937 | 120.3300, 151.0925, 164.9278,         |
|       | H | -2.98068158 | 0.62501468  | -0.88751717 | 191.5149, 240.0874, 257.2931,         |
|       | C | -1.40951190 | -1.50095434 | -0.15792650 | 289.9062, 353.0095, 395.0874,         |
|       | H | -1.18800225 | -2.41243281 | 0.40312782  | 404.7706, 495.0152, 669.5322,         |
|       | H | -2.10637156 | -1.78554450 | -0.95030735 | 735.5766, 762.1186, 824.9352,         |
|       | C | -2.11088435 | -0.50631984 | 0.76712460  | 853.7401, 876.8979, 921.2026,         |
|       | H | -1.48934944 | -0.28568970 | 1.63745813  | 950.0008, 974.5175, 1020.3427,        |
|       | H | -3.01306382 | -0.98141650 | 1.16309452  | 1048.4867, 1067.9870, 1087.4219,      |
|       | C | -0.12275287 | -0.98049828 | -0.79451132 | 1096.2967, 1124.2716, 1159.9944,      |
|       | H | -0.34073997 | -0.09188079 | -1.39394216 | 1173.9803, 1237.4218, 1247.0824,      |
|       | H | 0.25523224  | -1.72944228 | -1.49459837 | 1284.5117, 1298.1043, 1325.3210,      |
|       | C | 0.97736431  | -0.66091139 | 0.21208414  | 1328.6413, 1334.0074, 1371.4899,      |
|       | H | 1.23019867  | -1.56674917 | 0.77209404  | 1388.8646, 1395.6049, 1411.0651,      |
|       | H | 0.61541754  | 0.04893101  | 0.96477768  | 1416.6175, 1443.0595, 1485.5048,      |
|       | C | 2.23770497  | -0.10312752 | -0.44016631 | 1492.6357, 1495.3736, 1500.0732,      |
|       | H | 2.61839607  | -0.83386534 | -1.15779853 | 1503.7545, 1506.7563, 1517.3929,      |
| SP1_3 | C | -2.51791135 | 0.78438528  | 0.08710137  |                                       |
|       | H | -3.15365126 | 1.41262509  | 0.70777406  | 770.0318i, 50.1400, 58.3739, 74.1082, |
|       | H | -1.60414835 | 1.47609965  | -0.13836937 | 120.3300, 151.0925, 164.9278,         |
|       | H | -2.98068158 | 0.62501468  | -0.88751717 | 191.5149, 240.0874, 257.2931,         |
|       | C | -1.40951190 | -1.50095434 | -0.15792650 | 289.9062, 353.0095, 395.0874,         |
|       | H | -1.18800225 | -2.41243281 | 0.40312782  | 404.7706, 495.0152, 669.5322,         |
|       | H | -2.10637156 | -1.78554450 | -0.95030735 | 735.5766, 762.1186, 824.9352,         |
|       | C | -2.11088435 | -0.50631984 | 0.76712460  | 853.7401, 876.8979, 921.2026,         |
|       | H | -1.48934944 | -0.28568970 | 1.63745813  | 950.0008, 974.5175, 1020.3427,        |
|       | H | -3.01306382 | -0.98141650 | 1.16309452  | 1048.4867, 1067.9870, 1087.4219,      |
|       | C | -0.12275287 | -0.98049828 | -0.79451132 | 1096.2967, 1124.2716, 1159.9944,      |
|       | H | -0.34073997 | -0.09188079 | -1.39394216 | 1173.9803, 1237.4218, 1247.0824,      |
|       | H | 0.25523224  | -1.72944228 | -1.49459837 | 1284.5117, 1298.1043, 1325.3210,      |
|       | C | 0.97736431  | -0.66091139 | 0.21208414  | 1328.6413, 1334.0074, 1371.4899,      |
|       | H | 1.23019867  | -1.56674917 | 0.77209404  | 1388.8646, 1395.6049, 1411.0651,      |
|       | H | 0.61541754  | 0.04893101  | 0.96477768  | 1416.6175, 1443.0595, 1485.5048,      |
|       | C | 2.23770497  | -0.10312752 | -0.44016631 | 1492.6357, 1495.3736, 1500.0732,      |
|       | H | 2.61839607  | -0.83386534 | -1.15779853 | 1503.7545, 1506.7563, 1517.3929,      |

|       |             |             |             |                                  |                                       |
|-------|-------------|-------------|-------------|----------------------------------|---------------------------------------|
|       | H           | 1.98215372  | 0.78460244  | -1.02767339                      | 1522.5865, 3024.9895, 3037.6401,      |
|       | C           | 3.32049612  | 0.24287963  | 0.57321305                       | 3042.7552, 3050.0806, 3050.7430,      |
|       | H           | 3.60710231  | -0.63799887 | 1.14918091                       | 3055.6706, 3057.1563, 3074.9051,      |
|       | H           | 2.96644317  | 0.99694348  | 1.27808895                       | 3076.8371, 3083.4388, 3093.3353,      |
|       | H           | 4.21455654  | 0.63276141  | 0.08859802                       | 3096.1078, 3121.8748, 3134.8096,      |
|       | O           | -0.50620309 | 2.36974969  | -0.31540464                      | 3154.4708, 3782.9601                  |
|       | H           | 0.18910301  | 1.73732351  | -0.07226487                      |                                       |
| SP1_4 | C           | 2.89725545  | -0.07103846 | 0.59516692                       | 771.1119i, 57.9339, 64.2050, 70.9459, |
|       | H           | 3.97995103  | -0.00224854 | 0.50952189                       | 112.5468, 118.5233, 137.7737,         |
|       | H           | 2.55009915  | 1.01328426  | 0.34557209                       | 171.2417, 208.3117, 245.6579,         |
|       | H           | 2.61011300  | -0.23449843 | 1.63449599                       | 272.0147, 328.4953, 360.0510,         |
|       | C           | 0.82721679  | -1.40915983 | -0.06788303                      | 398.2492, 498.1551, 672.0463,         |
|       | H           | 0.48862483  | -2.17672322 | -0.76813910                      | 738.7472, 774.0417, 828.1741,         |
|       | H           | 0.75165627  | -1.84814306 | 0.93159746                       | 846.8033, 889.4405, 922.7040,         |
|       | C           | 2.28857509  | -1.07859920 | -0.35900543                      | 948.0053, 992.4767, 1029.1443,        |
|       | H           | 2.38800657  | -0.71259479 | -1.38454784                      | 1053.1437, 1078.3867, 1093.3978,      |
|       | H           | 2.87360108  | -2.00101816 | -0.30895939                      | 1111.8025, 1138.1922, 1175.9860,      |
|       | C           | -0.11434275 | -0.21372702 | -0.15306535                      | 1220.7553, 1247.5490, 1256.3156,      |
|       | H           | 0.00864234  | 0.27142484  | -1.12951840                      | 1289.4768, 1304.5505, 1324.4060,      |
|       | H           | 0.15575728  | 0.52314997  | 0.60958548                       | 1331.4157, 1337.7408, 1346.9388,      |
|       | C           | -1.57809545 | -0.59377037 | 0.02953993                       | 1389.3539, 1397.2886, 1408.2176,      |
|       | H           | -1.70120644 | -1.09593669 | 0.99417412                       | 1414.8937, 1437.2053, 1480.5773,      |
|       | H           | -1.86059905 | -1.32504408 | -0.73401190                      | 1488.2066, 1493.3508, 1496.2407,      |
|       | C           | -2.52240038 | 0.59952542  | -0.04094768                      | 1503.4783, 1508.7742, 1510.4383,      |
|       | H           | -2.23771530 | 1.32757332  | 0.72299457                       | 1521.0785, 3010.1043, 3033.7886,      |
| H     | -2.39587132 | 1.09999098  | -1.00467352 | 3041.1345, 3044.1769, 3048.0516, |                                       |
| C     | -3.98120073 | 0.20316453  | 0.14399822  | 3055.4966, 3057.8569, 3066.7155, |                                       |
| H     | -4.13249924 | -0.27500438 | 1.11273453  | 3073.6325, 3083.8309, 3088.6821, |                                       |
| H     | -4.29083368 | -0.50509769 | -0.62576583 | 3094.1787, 3124.1672, 3132.9847, |                                       |
| H     | -4.64256711 | 1.06700976  | 0.09006263  | 3155.1826, 3787.5805             |                                       |
| O     | 2.15589962  | 2.28389003  | -0.16924010 |                                  |                                       |
| H     | 1.30559559  | 1.98438525  | -0.52802334 |                                  |                                       |
| SP1_5 | C           | 2.57150245  | 0.40358604  | -0.21458700                      | 650.3585i, 24.6746, 36.0680, 61.0650, |
|       | H           | 2.79410155  | 0.23302924  | -1.26843667                      | 82.9574, 116.4827, 136.3579,          |
|       | H           | 1.70588436  | 1.17807832  | -0.21407267                      | 205.0934, 230.4193, 257.2453,         |
|       | H           | 3.41257279  | 0.89441118  | 0.27172831                       | 296.0042, 347.6821, 363.6164,         |
|       | C           | 1.02344070  | -1.61507824 | -0.24269996                      | 434.9081, 507.8703, 678.3573,         |
|       | H           | 1.44207859  | -1.98507086 | -1.18257059                      | 737.6979, 763.3528, 821.5152,         |
|       | H           | 0.74930094  | -2.49657732 | 0.34256106                       | 852.0614, 857.1013, 905.4832,         |
|       | C           | 2.11306762  | -0.84829620 | 0.50530613                       | 954.8289, 966.6980, 1013.5784,        |
|       | H           | 2.97847800  | -1.50450947 | 0.63801687                       | 1048.9591, 1072.2268, 1093.5117,      |
|       | H           | 1.77601929  | -0.58890770 | 1.51025476                       | 1120.1652, 1136.9470, 1156.8069,      |
|       | C           | -0.23624182 | -0.80364297 | -0.54529523                      | 1180.8581, 1231.2846, 1243.2650,      |
|       | H           | -0.92184000 | -1.44005916 | -1.10789422                      | 1292.7277, 1298.8732, 1334.2252,      |
|       | H           | 0.00808629  | 0.03895062  | -1.19862327                      | 1337.8462, 1348.4951, 1376.6106,      |
|       | C           | -0.93660358 | -0.27143717 | 0.70037668                       | 1379.6931, 1391.4448, 1408.5769,      |
|       | H           | -0.23783922 | 0.33787785  | 1.27579394                       | 1416.3530, 1451.0513, 1480.5539,      |
|       | H           | -1.22603423 | -1.11449182 | 1.33783418                       | 1486.3928, 1492.1705, 1494.3339,      |
|       | C           | -2.16505561 | 0.58046165  | 0.39004443                       | 1503.8142, 1505.5747, 1513.0427,      |
|       | H           | -2.56091615 | 0.98054679  | 1.32554352                       | 1580.0618, 3026.6734, 3039.3017,      |
| H     | -1.84908827 | 1.44073986  | -0.20484901 | 3047.7040, 3053.1487, 3055.5979, |                                       |
| C     | -3.27110748 | -0.17561422 | -0.33831883 | 3057.1239, 3076.6959, 3081.8601, |                                       |
| H     | -3.55129411 | -1.07711656 | 0.21050302  | 3086.4698, 3089.9103, 3099.3518, |                                       |
| H     | -2.96049459 | -0.47882091 | -1.33779130 | 3107.5623, 3122.5975, 3134.3702, |                                       |
| H     | -4.16364046 | 0.44012970  | -0.44614947 | 3150.5777, 3787.5202             |                                       |
| O     | 0.81414902  | 2.31495945  | -0.16963135 |                                  |                                       |
| H     | 1.49741940  | 3.00224128  | -0.12375507 |                                  |                                       |
| SP1_6 | C           | -3.10421686 | -0.85186340 | -0.05613589                      | 691.8743i, 27.7179, 56.2268, 83.2049, |

|       |   |             |             |             |                                       |
|-------|---|-------------|-------------|-------------|---------------------------------------|
|       | H | -3.83133478 | -1.44724396 | 0.49339101  | 94.1633, 112.6064, 127.5070,          |
|       | H | -3.37697580 | 0.24709307  | 0.20850858  | 147.6817, 162.5330, 246.2239,         |
|       | H | -3.26878404 | -0.95752020 | -1.12838997 | 289.8154, 321.2950, 357.7682,         |
|       | C | -0.68063156 | -0.21339460 | -0.39738231 | 398.8201, 497.7240, 723.9829,         |
|       | H | -0.80725628 | -0.35699824 | -1.47547890 | 742.0402, 773.9320, 800.2796,         |
|       | H | -0.92260792 | 0.83316689  | -0.18988874 | 847.3347, 881.4017, 910.5502,         |
|       | C | -1.66849284 | -1.10204323 | 0.34761353  | 949.4655, 985.5663, 1027.1986,        |
|       | H | -1.55705140 | -0.94795021 | 1.42318864  | 1055.1804, 1076.3793, 1095.6457,      |
|       | H | -1.42312000 | -2.15279170 | 0.15906057  | 1107.6197, 1150.1225, 1181.9692,      |
|       | C | 0.77018917  | -0.48161742 | -0.01920732 | 1212.8399, 1241.3768, 1266.2768,      |
|       | H | 1.01690604  | -1.52605765 | -0.23788923 | 1284.7324, 1314.6236, 1324.2187,      |
|       | H | 0.88148300  | -0.35799326 | 1.06091089  | 1335.5567, 1352.0788, 1365.3641,      |
|       | C | 1.74862685  | 0.43027211  | -0.75079758 | 1379.1862, 1398.4268, 1411.1722,      |
|       | H | 1.55210623  | 1.46799377  | -0.46332623 | 1415.7063, 1457.6075, 1479.6517,      |
|       | H | 1.55393806  | 0.36600014  | -1.82476000 | 1484.3199, 1492.7283, 1494.5029,      |
|       | C | 3.21694302  | 0.10498908  | -0.48793928 | 1505.2828, 1510.5963, 1513.3623,      |
|       | H | 3.42171840  | -0.91658257 | -0.81926221 | 1517.5639, 3029.6468, 3030.8272,      |
|       | H | 3.83965569  | 0.75816757  | -1.10211163 | 3035.0925, 3041.6261, 3047.8634,      |
|       | C | 3.62057555  | 0.25627909  | 0.97463651  | 3058.7680, 3064.8315, 3070.8137,      |
|       | H | 3.11010435  | -0.46840451 | 1.60827703  | 3081.4612, 3085.8930, 3090.9998,      |
|       | H | 3.37121932  | 1.25332316  | 1.34251097  | 3098.7906, 3125.6522, 3135.5566,      |
|       | H | 4.69220668  | 0.10984402  | 1.10512790  | 3152.7692, 3788.3062                  |
|       | O | -3.54009656 | 1.66825230  | 0.34438950  |                                       |
|       | H | -3.34939504 | 1.89420537  | -0.57971066 |                                       |
|       | C | -3.03316805 | -0.98113011 | 0.24596268  | 693.0276i, 26.6162, 53.8969, 86.0540, |
|       | H | -3.08384931 | -1.01381503 | 1.33425726  | 92.9658, 113.8735, 117.4361,          |
|       | H | -3.43822103 | 0.06225439  | -0.06859308 | 150.5550, 162.2296, 240.9579,         |
|       | H | -3.74485443 | -1.68489614 | -0.18224114 | 287.0736, 318.8450, 357.4728,         |
|       | C | -0.66449723 | -0.09570336 | 0.29531658  | 397.9624, 497.2160, 721.9690,         |
|       | H | -1.03676036 | 0.90456109  | 0.05587181  | 738.8938, 773.1423, 797.9053,         |
|       | H | -0.66258617 | -0.17667907 | 1.38741145  | 844.4771, 886.1279, 910.1276,         |
|       | C | -1.62408556 | -1.12761559 | -0.28329918 | 946.5173, 983.8136, 1029.2797,        |
|       | H | -1.25825802 | -2.13334501 | -0.05009707 | 1053.0804, 1077.7869, 1095.0825,      |
|       | H | -1.63082644 | -1.04730587 | -1.37265002 | 1107.3383, 1147.1795, 1188.9244,      |
|       | C | 0.75999680  | -0.24517046 | -0.22275294 | 1206.7529, 1242.6538, 1265.5912,      |
|       | H | 0.75963589  | -0.14885552 | -1.31350169 | 1289.3093, 1305.1121, 1331.3942,      |
|       | H | 1.11479530  | -1.25528222 | -0.00224980 | 1334.4467, 1350.3113, 1364.6795,      |
|       | C | 1.71456426  | 0.78380267  | 0.37236846  | 1379.1762, 1398.4200, 1410.9900,      |
|       | H | 1.77711143  | 0.62972802  | 1.45445991  | 1415.1378, 1456.0903, 1479.0891,      |
|       | H | 1.29064270  | 1.78090760  | 0.22710473  | 1484.0394, 1491.9921, 1493.9231,      |
|       | C | 3.11992722  | 0.74587846  | -0.22272354 | 1504.5031, 1509.8071, 1511.7090,      |
|       | H | 3.05904840  | 0.94814443  | -1.29533034 | 1516.7377, 3029.4903, 3031.4653,      |
|       | H | 3.70971729  | 1.55606976  | 0.21009510  | 3034.7986, 3043.9396, 3049.0653,      |
|       | C | 3.84171928  | -0.57779065 | 0.00523156  | 3058.2342, 3062.5017, 3071.0802,      |
|       | H | 3.35019231  | -1.39743551 | -0.51810588 | 3081.0443, 3086.0770, 3090.6119,      |
|       | H | 3.86406630  | -0.82737904 | 1.06780008  | 3098.5303, 3125.3412, 3135.2376,      |
|       | H | 4.87090030  | -0.53191502 | -0.34907351 | 3152.1566, 3788.4323                  |
|       | O | -3.75959541 | 1.44559293  | -0.29118818 |                                       |
|       | H | -3.55073116 | 1.75687397  | 0.60372586  |                                       |
| SP1_7 | C | -3.03316805 | -0.98113011 | 0.24596268  | 693.0276i, 26.6162, 53.8969, 86.0540, |
|       | H | -3.08384931 | -1.01381503 | 1.33425726  | 92.9658, 113.8735, 117.4361,          |
|       | H | -3.43822103 | 0.06225439  | -0.06859308 | 150.5550, 162.2296, 240.9579,         |
|       | H | -3.74485443 | -1.68489614 | -0.18224114 | 287.0736, 318.8450, 357.4728,         |
|       | C | -0.66449723 | -0.09570336 | 0.29531658  | 397.9624, 497.2160, 721.9690,         |
|       | H | -1.03676036 | 0.90456109  | 0.05587181  | 738.8938, 773.1423, 797.9053,         |
|       | H | -0.66258617 | -0.17667907 | 1.38741145  | 844.4771, 886.1279, 910.1276,         |
|       | C | -1.62408556 | -1.12761559 | -0.28329918 | 946.5173, 983.8136, 1029.2797,        |
|       | H | -1.25825802 | -2.13334501 | -0.05009707 | 1053.0804, 1077.7869, 1095.0825,      |
|       | H | -1.63082644 | -1.04730587 | -1.37265002 | 1107.3383, 1147.1795, 1188.9244,      |
|       | C | 0.75999680  | -0.24517046 | -0.22275294 | 1206.7529, 1242.6538, 1265.5912,      |
|       | H | 0.75963589  | -0.14885552 | -1.31350169 | 1289.3093, 1305.1121, 1331.3942,      |
|       | H | 1.11479530  | -1.25528222 | -0.00224980 | 1334.4467, 1350.3113, 1364.6795,      |
|       | C | 1.71456426  | 0.78380267  | 0.37236846  | 1379.1762, 1398.4200, 1410.9900,      |
|       | H | 1.77711143  | 0.62972802  | 1.45445991  | 1415.1378, 1456.0903, 1479.0891,      |
|       | H | 1.29064270  | 1.78090760  | 0.22710473  | 1484.0394, 1491.9921, 1493.9231,      |
|       | C | 3.11992722  | 0.74587846  | -0.22272354 | 1504.5031, 1509.8071, 1511.7090,      |
|       | H | 3.05904840  | 0.94814443  | -1.29533034 | 1516.7377, 3029.4903, 3031.4653,      |
|       | H | 3.70971729  | 1.55606976  | 0.21009510  | 3034.7986, 3043.9396, 3049.0653,      |
|       | C | 3.84171928  | -0.57779065 | 0.00523156  | 3058.2342, 3062.5017, 3071.0802,      |
|       | H | 3.35019231  | -1.39743551 | -0.51810588 | 3081.0443, 3086.0770, 3090.6119,      |
|       | H | 3.86406630  | -0.82737904 | 1.06780008  | 3098.5303, 3125.3412, 3135.2376,      |
|       | H | 4.87090030  | -0.53191502 | -0.34907351 | 3152.1566, 3788.4323                  |
|       | O | -3.75959541 | 1.44559293  | -0.29118818 |                                       |
|       | H | -3.55073116 | 1.75687397  | 0.60372586  |                                       |
| SP1_8 | C | -2.90931912 | -0.59277000 | 0.78408740  | 700.4257i, 26.1918, 59.3299, 75.2101, |
|       | H | -3.32047457 | -0.62874449 | 1.79149231  | 89.7131, 90.4086, 123.4536, 140.4074, |
|       | H | -3.21740079 | 0.45713652  | 0.38896805  | 207.2241, 245.4593, 267.9884,         |
|       | H | -3.41590253 | -1.31748420 | 0.14688850  | 313.4974, 323.4900, 407.2002,         |
|       | C | -0.85968904 | -0.56983014 | -0.69187132 | 518.0581, 724.3287, 738.2174,         |
|       | H | -1.40480249 | -1.25822295 | -1.34434391 | 779.8981, 793.8920, 850.9449,         |
|       | H | -1.07487746 | 0.44101543  | -1.05060986 | 873.0983, 918.1251, 931.9268,         |
|       | C | -1.40231081 | -0.70672815 | 0.72701051  | 989.6875, 1026.1519, 1058.0167,       |
|       | H | -0.95854414 | 0.05288039  | 1.37203109  |                                       |

|        |   |             |             |             |                                       |
|--------|---|-------------|-------------|-------------|---------------------------------------|
|        | H | -1.10091892 | -1.67777920 | 1.13638639  | 1072.6898, 1093.7908, 1111.0923,      |
|        | C | 0.63654237  | -0.84450823 | -0.81267234 | 1152.2525, 1174.1951, 1216.3830,      |
|        | H | 0.92731821  | -0.77612011 | -1.86421321 | 1244.6663, 1268.1326, 1285.6591,      |
|        | H | 0.84240031  | -1.87425618 | -0.50381810 | 1310.3753, 1319.2314, 1333.3065,      |
|        | C | 1.50991648  | 0.10445460  | 0.00050157  | 1349.5535, 1364.1270, 1376.8372,      |
|        | H | 1.31277620  | -0.02751751 | 1.06772133  | 1404.4426, 1409.7750, 1413.7220,      |
|        | H | 1.23893639  | 1.13876288  | -0.23615231 | 1459.1733, 1479.2079, 1486.0031,      |
|        | C | 2.99858956  | -0.09853879 | -0.25304250 | 1490.6283, 1500.6380, 1502.2573,      |
|        | H | 3.26008720  | -1.13736158 | -0.03470254 | 1503.5772, 1513.7141, 1517.2357,      |
|        | H | 3.20473661  | 0.05225690  | -1.31579126 | 3025.7312, 3030.5327, 3037.4232,      |
|        | C | 3.86756024  | 0.83651887  | 0.57761451  | 3039.1001, 3048.5306, 3057.0264,      |
|        | H | 3.69725699  | 0.67910725  | 1.64359919  | 3061.6652, 3070.9270, 3077.5540,      |
|        | H | 3.63459290  | 1.87919432  | 0.35702376  | 3085.4386, 3093.7949, 3102.9832,      |
|        | H | 4.92791859  | 0.68143608  | 0.38147632  | 3123.2969, 3131.5156, 3153.1963,      |
|        | O | -3.50131460 | 1.66187838  | -0.33912812 | 3789.4496                             |
|        | H | -3.59032387 | 1.24908039  | -1.21269777 |                                       |
|        | C | 2.97715858  | -0.38283532 | 0.74263835  | 688.7859i, 29.6566, 63.6121, 77.9530, |
|        | H | 3.92742285  | -0.91400247 | 0.73980681  | 98.4139, 105.8624, 121.7573,          |
|        | H | 3.18436181  | 0.57767833  | 0.12133918  | 151.8701, 211.1571, 240.8962,         |
|        | H | 2.73882268  | -0.04888819 | 1.75241875  | 271.6066, 311.2297, 321.3426,         |
|        | C | 0.54297538  | -0.34713333 | 0.05389479  | 411.4335, 516.3177, 722.3224,         |
|        | H | 0.28285405  | -0.04929876 | 1.07341859  | 738.0871, 772.3533, 810.7317,         |
|        | H | 0.70674068  | 0.57495423  | -0.51263561 | 848.4226, 870.7678, 905.9450,         |
|        | C | 1.84338179  | -1.14047683 | 0.08892289  | 947.8958, 989.2550, 1031.7241,        |
|        | H | 2.12663915  | -1.42022396 | -0.92818452 | 1056.7071, 1070.0901, 1091.3544,      |
|        | H | 1.68035849  | -2.07746806 | 0.63256542  | 1111.1986, 1153.0663, 1178.1752,      |
|        | C | -0.60705157 | -1.12964948 | -0.57012320 | 1215.9966, 1247.6150, 1273.4366,      |
|        | H | -0.82280220 | -2.00603711 | 0.04928021  | 1287.2957, 1311.2612, 1324.6192,      |
|        | H | -0.28340895 | -1.51202210 | -1.54168112 | 1336.2612, 1345.5677, 1360.5191,      |
|        | C | -1.88458333 | -0.31560622 | -0.75422364 | 1383.5446, 1405.5089, 1410.3098,      |
|        | H | -2.63023894 | -0.93041664 | -1.26537531 | 1413.4691, 1456.8501, 1480.2686,      |
|        | H | -1.68071385 | 0.53229370  | -1.41573788 | 1484.9310, 1490.6984, 1497.9352,      |
|        | C | -2.48783117 | 0.20266140  | 0.54705490  | 1503.0337, 1506.4854, 1512.5045,      |
|        | H | -2.61309713 | -0.63316164 | 1.24148590  | 1519.2371, 3029.3651, 3033.6886,      |
|        | H | -1.79540580 | 0.89899526  | 1.02409215  | 3034.6970, 3043.7189, 3047.4760,      |
|        | C | -3.82644314 | 0.89523763  | 0.32574031  | 3056.4880, 3064.0283, 3068.6496,      |
|        | H | -4.55062310 | 0.20789287  | -0.11370970 | 3076.9757, 3087.4980, 3092.1171,      |
|        | H | -3.71618658 | 1.73864133  | -0.35754972 | 3098.0250, 3123.1096, 3131.5974,      |
|        | H | -4.24464993 | 1.27247465  | 1.25831744  | 3152.9199, 3786.4353                  |
|        | O | 3.20542167  | 1.84453857  | -0.55847718 |                                       |
|        | H | 2.70091406  | 2.33909292  | 0.10654048  |                                       |
| SP1_9  |   |             |             |             |                                       |
|        | C | -3.08613591 | -0.34530937 | 0.39851506  | 688.2647i, 35.4672, 53.4715, 75.5807, |
|        | H | -3.04534820 | -0.28753924 | 1.48622417  | 82.7760, 101.3454, 117.8822,          |
|        | H | -3.04739719 | 0.74986444  | 0.01077673  | 150.4992, 208.9100, 243.6752,         |
|        | H | -4.06139691 | -0.70964235 | 0.08033041  | 271.8004, 311.4832, 319.9722,         |
|        | C | -0.56944012 | -0.53519624 | 0.22740929  | 411.2061, 515.8305, 720.1724,         |
|        | H | -0.52774375 | 0.51441824  | -0.07220259 | 739.3082, 768.3235, 804.7693,         |
|        | H | -0.49423064 | -0.55526160 | 1.32031431  | 857.9925, 869.6634, 905.7651,         |
|        | C | -1.91905429 | -1.10204135 | -0.19520553 | 944.4915, 989.8694, 1037.2427,        |
|        | H | -1.98315937 | -2.15239247 | 0.10877388  | 1058.5440, 1064.8770, 1090.5242,      |
|        | H | -1.99157539 | -1.09243906 | -1.28519003 | 1111.6040, 1148.2881, 1191.5989,      |
|        | C | 0.60447354  | -1.30087927 | -0.37226579 | 1210.2422, 1246.8024, 1267.4240,      |
|        | H | 0.57046322  | -1.20819945 | -1.46220877 | 1299.4219, 1304.0238, 1324.9525,      |
|        | H | 0.48267385  | -2.36447992 | -0.15015186 | 1333.5931, 1347.6464, 1357.5652,      |
|        | C | 1.96920673  | -0.83823122 | 0.12996091  | 1382.6471, 1405.5518, 1409.7365,      |
|        | H | 2.74380579  | -1.48380578 | -0.29261965 | 1413.5852, 1456.6765, 1480.8590,      |
|        | H | 2.01961132  | -0.97018039 | 1.21564574  | 1484.7316, 1490.0960, 1497.8568,      |
|        | C | 2.30136279  | 0.61056808  | -0.21128150 |                                       |
| SP1_10 |   |             |             |             |                                       |

|        |             |             |             |                                  |                                       |
|--------|-------------|-------------|-------------|----------------------------------|---------------------------------------|
|        | H           | 2.17345681  | 0.76287291  | -1.28665179                      | 1503.9832, 1506.7165, 1512.6229,      |
|        | H           | 1.59175376  | 1.27890506  | 0.28003768                       | 1520.5078, 3028.4748, 3032.1007,      |
|        | C           | 3.71875720  | 0.98842807  | 0.19933314                       | 3033.8890, 3040.4383, 3050.1569,      |
|        | H           | 4.45080010  | 0.36025651  | -0.31016728                      | 3056.3302, 3068.3206, 3069.7483,      |
|        | H           | 3.85918989  | 0.85330255  | 1.27292851                       | 3077.2426, 3088.3024, 3093.2398,      |
|        | H           | 3.94403672  | 2.02723315  | -0.03938437                      | 3101.6689, 3123.0095, 3131.8425,      |
|        | O           | -2.79033043 | 2.12736877  | -0.31266659                      | 3152.3046, 3788.7679                  |
|        | H           | -2.47731616 | 2.39410511  | 0.56608402                       |                                       |
| SP1_11 | C           | 2.94845209  | 0.76093858  | -0.04765531                      | 668.8976i, 29.1536, 35.5608, 62.1833, |
|        | H           | 3.00599944  | 1.33079661  | 0.87949053                       | 70.6690, 86.8324, 108.7161, 144.3454, |
|        | H           | 3.92846217  | 0.14263000  | -0.12363790                      | 150.0288, 240.9733, 249.9860,         |
|        | H           | 2.97887292  | 1.43916740  | -0.90013775                      | 288.5365, 333.9755, 422.5732,         |
|        | C           | 0.43574043  | 0.54473257  | -0.01062630                      | 480.9459, 723.9234, 727.0577,         |
|        | H           | 0.39996982  | 1.14314626  | 0.90473586                       | 742.7360, 779.3449, 848.6379,         |
|        | H           | 0.36631752  | 1.25154547  | -0.84286627                      | 906.9634, 932.6648, 962.9792,         |
|        | C           | 1.77291440  | -0.19055447 | -0.08236826                      | 1018.2148, 1026.8634, 1063.1685,      |
|        | H           | 1.80904791  | -0.78603592 | -0.99701458                      | 1070.2991, 1083.7333, 1091.8335,      |
|        | H           | 1.84420555  | -0.89403580 | 0.75000810                       | 1144.5660, 1206.1148, 1236.0205,      |
|        | C           | -0.76029089 | -0.39814667 | -0.04607602                      | 1247.2444, 1257.2148, 1291.2659,      |
|        | H           | -0.68759271 | -1.10540597 | 0.78575350                       | 1307.5406, 1322.4917, 1331.7639,      |
|        | H           | -0.72077557 | -0.99689942 | -0.96110056                      | 1337.2072, 1344.2424, 1371.7716,      |
|        | C           | -2.09714520 | 0.32793823  | 0.02446119                       | 1396.2064, 1408.2888, 1413.9259,      |
|        | H           | -2.16967299 | 1.03574825  | -0.80729926                      | 1456.1942, 1484.1681, 1485.8460,      |
|        | H           | -2.13676346 | 0.92731791  | 0.93951471                       | 1491.2926, 1499.6092, 1504.0527,      |
|        | C           | -3.29460385 | -0.61322557 | -0.01125273                      | 1508.7234, 1514.7241, 1518.9208,      |
|        | H           | -3.25287587 | -1.21085324 | -0.92545040                      | 3029.8246, 3032.8645, 3040.9266,      |
| H      | -3.22009212 | -1.31911662 | 0.81993670  | 3049.5461, 3054.1387, 3057.0164, |                                       |
| C      | -4.62370645 | 0.12705197  | 0.05975360  | 3058.9749, 3063.0586, 3078.0153, |                                       |
| H      | -4.72716594 | 0.81850094  | -0.77770288 | 3082.8805, 3090.2634, 3101.1221, |                                       |
| H      | -4.69382364 | 0.70992048  | 0.97927790  | 3123.1856, 3131.8163, 3147.0392, |                                       |
| H      | -5.46905475 | -0.55961525 | 0.03342186  | 3792.7146                        |                                       |
| H      | 5.12686292  | -0.63283762 | 0.01201506  |                                  |                                       |
| H      | 5.44187516  | -0.21651789 | 0.82953295  |                                  |                                       |
| SP1_12 | C           | -2.67076345 | -0.38276320 | 0.86410303                       | 681.4537i, 21.8345, 46.4736, 66.4602, |
|        | H           | -2.04050305 | -0.29070874 | 1.74720541                       | 83.6016, 103.2701, 115.7587,          |
|        | H           | -2.75600443 | 0.70274205  | 0.46021923                       | 137.1486, 185.3985, 247.6646,         |
|        | H           | -3.67261558 | -0.69043603 | 1.15768533                       | 262.3054, 330.1249, 358.7460,         |
|        | C           | -0.77705809 | -0.67379135 | -0.80864339                      | 399.8050, 499.1217, 727.0134,         |
|        | H           | -0.43004023 | -1.33121859 | -1.60976074                      | 736.3461, 771.3688, 786.1540,         |
|        | H           | -0.99260847 | 0.29516072  | -1.26680206                      | 848.2362, 881.2077, 917.7680,         |
|        | C           | -2.07076329 | -1.24186569 | -0.22954498                      | 946.0996, 984.8744, 1028.1525,        |
|        | H           | -1.87983643 | -2.24215702 | 0.17432982                       | 1052.6376, 1083.5697, 1097.3011,      |
|        | H           | -2.80037851 | -1.36522952 | -1.03150955                      | 1106.4554, 1156.5875, 1166.3966,      |
|        | C           | 0.34070886  | -0.50744180 | 0.21439513                       | 1225.6925, 1256.1342, 1278.8308,      |
|        | H           | 0.48705689  | -1.45028107 | 0.75276933                       | 1286.4735, 1310.0856, 1334.0139,      |
|        | H           | 0.05246581  | 0.23562998  | 0.96261210                       | 1335.0882, 1350.8848, 1365.0206,      |
|        | C           | 1.65787264  | -0.07835825 | -0.41911075                      | 1383.9901, 1399.0141, 1411.0833,      |
|        | H           | 1.50431485  | 0.85302920  | -0.97294110                      | 1415.9504, 1451.2015, 1482.4666,      |
|        | H           | 1.96587898  | -0.82563367 | -1.15728816                      | 1487.1041, 1488.5559, 1495.3423,      |
|        | C           | 2.77803467  | 0.11816339  | 0.59429778                       | 1503.8358, 1505.1892, 1514.1457,      |
|        | H           | 2.47068060  | 0.86946948  | 1.32622291                       | 1518.4648, 3027.1169, 3031.4530,      |
| H      | 2.92450923  | -0.81101527 | 1.15132865  | 3033.2011, 3047.1533, 3049.6534, |                                       |
| C      | 4.08889023  | 0.54008741  | -0.05639166 | 3056.2935, 3058.0507, 3071.1015, |                                       |
| H      | 3.96746259  | 1.47982825  | -0.59698707 | 3085.5856, 3088.4761, 3098.5959, |                                       |
| H      | 4.42519216  | -0.21113227 | -0.77251157 | 3099.5264, 3122.5599, 3130.7217, |                                       |
| H      | 4.87916284  | 0.67747067  | 0.68087284  | 3158.3184, 3789.1586             |                                       |
| O      | -3.02452079 | 1.95040417  | -0.21624983 |                                  |                                       |
| H      | -3.99010028 | 1.85706534  | -0.23007772 |                                  |                                       |

|        |             |             |             |             |                                                                                                                                                                                                                                                                                                                                                                                                                                                                                                                                                                                                                                                                                                                                                            |
|--------|-------------|-------------|-------------|-------------|------------------------------------------------------------------------------------------------------------------------------------------------------------------------------------------------------------------------------------------------------------------------------------------------------------------------------------------------------------------------------------------------------------------------------------------------------------------------------------------------------------------------------------------------------------------------------------------------------------------------------------------------------------------------------------------------------------------------------------------------------------|
| SP1_13 | C           | 2.71618140  | 1.19637970  | 0.17469358  | 702.8758i, 27.9236, 48.4513, 67.7727, 94.7209, 110.5822, 119.8094, 136.8566, 206.9442, 242.1058, 265.1912, 311.0751, 333.9813, 407.7167, 517.1658, 717.1334, 733.5585, 776.9929, 787.9207, 837.5569, 873.8037, 911.6685, 942.4729, 978.7876, 1033.2456, 1062.0924, 1068.6520, 1089.1170, 1109.7285, 1147.0713, 1182.0223, 1219.9765, 1256.4303, 1285.3380, 1295.5082, 1309.4800, 1330.6491, 1334.4632, 1343.5343, 1366.1717, 1377.0105, 1403.7698, 1409.6997, 1412.3763, 1454.8165, 1478.8928, 1485.2957, 1490.4060, 1498.2798, 1501.6159, 1502.5217, 1513.1054, 1526.7011, 3028.7239, 3035.7278, 3039.4746, 3043.8830, 3049.0971, 3057.0023, 3060.0887, 3071.0338, 3076.5064, 3085.9080, 3093.0122, 3096.6058, 3122.8522, 3132.0937, 3151.3524, 3786.7196 |
|        | H           | 2.77513566  | 1.47971834  | 1.22589067  |                                                                                                                                                                                                                                                                                                                                                                                                                                                                                                                                                                                                                                                                                                                                                            |
|        | H           | 3.41756686  | 0.27480135  | 0.09002233  |                                                                                                                                                                                                                                                                                                                                                                                                                                                                                                                                                                                                                                                                                                                                                            |
|        | H           | 3.14691457  | 1.97847036  | -0.44786413 |                                                                                                                                                                                                                                                                                                                                                                                                                                                                                                                                                                                                                                                                                                                                                            |
|        | C           | 0.79061006  | -0.37102224 | 0.61313408  |                                                                                                                                                                                                                                                                                                                                                                                                                                                                                                                                                                                                                                                                                                                                                            |
|        | H           | 1.53142821  | -1.17364960 | 0.62297465  |                                                                                                                                                                                                                                                                                                                                                                                                                                                                                                                                                                                                                                                                                                                                                            |
|        | H           | 0.69447350  | -0.02062392 | 1.64571108  |                                                                                                                                                                                                                                                                                                                                                                                                                                                                                                                                                                                                                                                                                                                                                            |
|        | C           | 1.32903241  | 0.76658589  | -0.24836613 |                                                                                                                                                                                                                                                                                                                                                                                                                                                                                                                                                                                                                                                                                                                                                            |
|        | H           | 0.66010512  | 1.63033233  | -0.19337585 |                                                                                                                                                                                                                                                                                                                                                                                                                                                                                                                                                                                                                                                                                                                                                            |
|        | H           | 1.34437763  | 0.45208059  | -1.29554417 |                                                                                                                                                                                                                                                                                                                                                                                                                                                                                                                                                                                                                                                                                                                                                            |
|        | C           | -0.55024203 | -0.92308842 | 0.13904845  |                                                                                                                                                                                                                                                                                                                                                                                                                                                                                                                                                                                                                                                                                                                                                            |
|        | H           | -0.82949693 | -1.76960279 | 0.77165708  |                                                                                                                                                                                                                                                                                                                                                                                                                                                                                                                                                                                                                                                                                                                                                            |
|        | H           | -0.43783815 | -1.32211796 | -0.87388547 |                                                                                                                                                                                                                                                                                                                                                                                                                                                                                                                                                                                                                                                                                                                                                            |
|        | C           | -1.68529657 | 0.09467446  | 0.15181794  |                                                                                                                                                                                                                                                                                                                                                                                                                                                                                                                                                                                                                                                                                                                                                            |
|        | H           | -1.47600250 | 0.89847877  | -0.55941375 |                                                                                                                                                                                                                                                                                                                                                                                                                                                                                                                                                                                                                                                                                                                                                            |
|        | H           | -1.73949179 | 0.56487336  | 1.13970349  |                                                                                                                                                                                                                                                                                                                                                                                                                                                                                                                                                                                                                                                                                                                                                            |
|        | C           | -3.03719934 | -0.52100524 | -0.18729537 |                                                                                                                                                                                                                                                                                                                                                                                                                                                                                                                                                                                                                                                                                                                                                            |
|        | H           | -2.97326940 | -1.00725056 | -1.16427515 |                                                                                                                                                                                                                                                                                                                                                                                                                                                                                                                                                                                                                                                                                                                                                            |
|        | H           | -3.26143243 | -1.31125581 | 0.53365963  |                                                                                                                                                                                                                                                                                                                                                                                                                                                                                                                                                                                                                                                                                                                                                            |
|        | C           | -4.16383487 | 0.50372925  | -0.19502894 |                                                                                                                                                                                                                                                                                                                                                                                                                                                                                                                                                                                                                                                                                                                                                            |
| H      | -3.97243363 | 1.28481264  | -0.93225338 |             |                                                                                                                                                                                                                                                                                                                                                                                                                                                                                                                                                                                                                                                                                                                                                            |
| H      | -4.25563489 | 0.98552493  | 0.77951386  |             |                                                                                                                                                                                                                                                                                                                                                                                                                                                                                                                                                                                                                                                                                                                                                            |
| H      | -5.12325698 | 0.04609624  | -0.43376722 |             |                                                                                                                                                                                                                                                                                                                                                                                                                                                                                                                                                                                                                                                                                                                                                            |
| O      | 4.18850161  | -0.87545169 | -0.31308760 |             |                                                                                                                                                                                                                                                                                                                                                                                                                                                                                                                                                                                                                                                                                                                                                            |
| H      | 4.59533579  | -0.46459510 | -1.09207456 |             |                                                                                                                                                                                                                                                                                                                                                                                                                                                                                                                                                                                                                                                                                                                                                            |
| SP1_14 | C           | -3.03377920 | -0.38623154 | 0.53231357  | 704.9818i, 33.2804, 43.6608, 71.3255, 85.0712, 102.0473, 114.0987, 142.7468, 208.5462, 243.9298, 272.7749, 312.0610, 322.3770, 412.5052, 517.0198, 718.7079, 738.5995, 773.0910, 782.7793, 850.2925, 865.6728, 921.7423, 926.1502, 989.8353, 1029.2543, 1058.1720, 1073.1555, 1092.8685, 1110.2926, 1150.3172, 1177.1599, 1212.5179, 1264.0033, 1290.2568, 1297.9180, 1307.2986, 1329.3461, 1333.0122, 1348.0224, 1365.1075, 1379.2169, 1405.9634, 1410.0920, 1413.3187, 1452.1518, 1480.5726, 1484.8200, 1490.0939, 1497.8794, 1503.7732, 1505.2943, 1512.4582, 1520.8710, 3031.2457, 3032.6942, 3033.3043, 3041.1266, 3050.3909, 3056.6720, 3067.6684, 3069.4638, 3074.3081, 3088.1152, 3094.2832, 3103.1582, 3123.4368, 3132.4650, 3152.6358, 3791.2233 |
|        | H           | -2.96363154 | -0.45611546 | 1.61800451  |                                                                                                                                                                                                                                                                                                                                                                                                                                                                                                                                                                                                                                                                                                                                                            |
|        | H           | -2.95457051 | 0.75189143  | 0.31528871  |                                                                                                                                                                                                                                                                                                                                                                                                                                                                                                                                                                                                                                                                                                                                                            |
|        | H           | -4.02076301 | -0.70252281 | 0.19983833  |                                                                                                                                                                                                                                                                                                                                                                                                                                                                                                                                                                                                                                                                                                                                                            |
|        | C           | -0.52916620 | -0.55417446 | 0.25305458  |                                                                                                                                                                                                                                                                                                                                                                                                                                                                                                                                                                                                                                                                                                                                                            |
|        | H           | -0.50282275 | 0.52512034  | 0.08845105  |                                                                                                                                                                                                                                                                                                                                                                                                                                                                                                                                                                                                                                                                                                                                                            |
|        | H           | -0.41137621 | -0.70958392 | 1.33078143  |                                                                                                                                                                                                                                                                                                                                                                                                                                                                                                                                                                                                                                                                                                                                                            |
|        | C           | -1.89307179 | -1.07382447 | -0.18426413 |                                                                                                                                                                                                                                                                                                                                                                                                                                                                                                                                                                                                                                                                                                                                                            |
|        | H           | -1.95035502 | -2.15217800 | -0.00157075 |                                                                                                                                                                                                                                                                                                                                                                                                                                                                                                                                                                                                                                                                                                                                                            |
|        | H           | -2.00296342 | -0.93810833 | -1.26308668 |                                                                                                                                                                                                                                                                                                                                                                                                                                                                                                                                                                                                                                                                                                                                                            |
|        | C           | 0.62109938  | -1.23058077 | -0.48369939 |                                                                                                                                                                                                                                                                                                                                                                                                                                                                                                                                                                                                                                                                                                                                                            |
|        | H           | 0.54501679  | -1.00072525 | -1.55114335 |                                                                                                                                                                                                                                                                                                                                                                                                                                                                                                                                                                                                                                                                                                                                                            |
|        | H           | 0.51001020  | -2.31472625 | -0.39399026 |                                                                                                                                                                                                                                                                                                                                                                                                                                                                                                                                                                                                                                                                                                                                                            |
|        | C           | 2.00351349  | -0.82592311 | 0.02048155  |                                                                                                                                                                                                                                                                                                                                                                                                                                                                                                                                                                                                                                                                                                                                                            |
|        | H           | 2.76280981  | -1.40541201 | -0.51170213 |                                                                                                                                                                                                                                                                                                                                                                                                                                                                                                                                                                                                                                                                                                                                                            |
|        | H           | 2.09681869  | -1.09606917 | 1.07732056  |                                                                                                                                                                                                                                                                                                                                                                                                                                                                                                                                                                                                                                                                                                                                                            |
|        | C           | 2.31672079  | 0.65759429  | -0.14301771 |                                                                                                                                                                                                                                                                                                                                                                                                                                                                                                                                                                                                                                                                                                                                                            |
|        | H           | 2.14608920  | 0.94620532  | -1.18401636 |                                                                                                                                                                                                                                                                                                                                                                                                                                                                                                                                                                                                                                                                                                                                                            |
|        | H           | 1.62480725  | 1.25058130  | 0.45761602  |                                                                                                                                                                                                                                                                                                                                                                                                                                                                                                                                                                                                                                                                                                                                                            |
|        | C           | 3.74796689  | 0.99120502  | 0.25780194  |                                                                                                                                                                                                                                                                                                                                                                                                                                                                                                                                                                                                                                                                                                                                                            |
| H      | 4.46193348  | 0.44048229  | -0.35637740 |             |                                                                                                                                                                                                                                                                                                                                                                                                                                                                                                                                                                                                                                                                                                                                                            |
| H      | 3.93073559  | 0.71996845  | 1.29875449  |             |                                                                                                                                                                                                                                                                                                                                                                                                                                                                                                                                                                                                                                                                                                                                                            |
| H      | 3.95973468  | 2.05411950  | 0.14733328  |             |                                                                                                                                                                                                                                                                                                                                                                                                                                                                                                                                                                                                                                                                                                                                                            |
| O      | -2.87023274 | 2.07589605  | -0.24902160 |             |                                                                                                                                                                                                                                                                                                                                                                                                                                                                                                                                                                                                                                                                                                                                                            |
| H      | -3.66931156 | 2.01151442  | -0.79535106 |             |                                                                                                                                                                                                                                                                                                                                                                                                                                                                                                                                                                                                                                                                                                                                                            |
| SP1_15 | C           | -2.90978517 | -0.43564418 | 0.83476134  | 705.0305i, 29.0183, 50.8167, 72.5248, 83.1524, 98.1671, 116.2758, 141.5391, 210.8958, 242.6688, 271.1128, 311.1082, 324.9447, 412.7562, 515.9638, 721.5235, 738.5194, 775.2282, 783.4769, 849.8526, 866.3645, 920.1531, 931.7676,                                                                                                                                                                                                                                                                                                                                                                                                                                                                                                                          |
|        | H           | -2.64390518 | -0.25117718 | 1.87577873  |                                                                                                                                                                                                                                                                                                                                                                                                                                                                                                                                                                                                                                                                                                                                                            |
|        | H           | -3.07177836 | 0.62501616  | 0.39004287  |                                                                                                                                                                                                                                                                                                                                                                                                                                                                                                                                                                                                                                                                                                                                                            |
|        | H           | -3.86733033 | -0.95011487 | 0.77845505  |                                                                                                                                                                                                                                                                                                                                                                                                                                                                                                                                                                                                                                                                                                                                                            |
|        | C           | -0.50050860 | -0.31783340 | 0.08498712  |                                                                                                                                                                                                                                                                                                                                                                                                                                                                                                                                                                                                                                                                                                                                                            |
|        | H           | -0.67886388 | 0.68475315  | -0.31533671 |                                                                                                                                                                                                                                                                                                                                                                                                                                                                                                                                                                                                                                                                                                                                                            |
|        | H           | -0.19790731 | -0.18864555 | 1.12734403  |                                                                                                                                                                                                                                                                                                                                                                                                                                                                                                                                                                                                                                                                                                                                                            |
| C      | -1.80567182 | -1.10308236 | 0.04555444  |             |                                                                                                                                                                                                                                                                                                                                                                                                                                                                                                                                                                                                                                                                                                                                                            |



|        |   |             |             |             |                                       |
|--------|---|-------------|-------------|-------------|---------------------------------------|
|        | H | -1.63761578 | -2.11043131 | 0.44163232  | 989.4720, 1028.1318, 1057.5906,       |
|        | H | -2.12235314 | -1.22924149 | -0.99260662 | 1076.2046, 1094.0555, 1111.4978,      |
|        | C | 0.61548974  | -0.99364077 | -0.70334169 | 1158.0056, 1165.7693, 1215.7576,      |
|        | H | 0.25144705  | -1.21021462 | -1.71121444 | 1270.9800, 1282.1190, 1298.2638,      |
|        | H | 0.84548490  | -1.96083159 | -0.24481884 | 1310.1133, 1327.6683, 1338.8440,      |
|        | C | 1.89392003  | -0.16611958 | -0.80198089 | 1344.2385, 1364.9100, 1378.8597,      |
|        | H | 1.67365563  | 0.77952606  | -1.30707752 | 1404.8415, 1410.4743, 1413.5942,      |
|        | H | 2.61329210  | -0.69220220 | -1.43540319 | 1453.9964, 1481.4276, 1484.0670,      |
|        | C | 2.55092534  | 0.12981647  | 0.54207191  | 1490.2667, 1498.1198, 1503.5079,      |
|        | H | 1.88489878  | 0.74320449  | 1.15171784  | 1505.8963, 1512.8767, 1525.7122,      |
|        | H | 2.69212904  | -0.80877613 | 1.08593068  | 3031.0568, 3033.4394, 3034.9088,      |
|        | C | 3.88851996  | 0.84161858  | 0.38488952  | 3046.9403, 3048.0683, 3056.4828,      |
|        | H | 3.76278634  | 1.78593334  | -0.14691000 | 3065.2969, 3068.5979, 3074.3985,      |
|        | H | 4.58804670  | 0.23123028  | -0.18803132 | 3087.7457, 3093.0531, 3099.3612,      |
|        | H | 4.34519202  | 1.05948829  | 1.34973797  | 3123.4178, 3131.6604, 3152.7028,      |
|        | O | -3.33055362 | 1.78421671  | -0.42692433 | 3788.0895                             |
|        | H | -4.19008635 | 1.48806092  | -0.76549666 |                                       |
|        | C | -3.09223255 | -0.83574137 | 0.05015156  | 708.7981i, 29.5490, 46.8491, 82.8533, |
|        | H | -3.84962949 | -1.18037867 | 0.75178761  | 90.9816, 112.2556, 128.7171,          |
|        | H | -3.31703374 | 0.28373847  | -0.16334011 | 147.8797, 154.4292, 246.6335,         |
|        | H | -3.22618306 | -1.32355381 | -0.91556291 | 288.5499, 323.6027, 361.0449,         |
|        | C | -0.65035587 | -0.37818626 | -0.40397626 | 398.8955, 496.9217, 720.8331,         |
|        | H | -0.72537870 | -0.92287576 | -1.35031294 | 739.7353, 774.0105, 790.2606,         |
|        | H | -0.89976084 | 0.66333475  | -0.62532195 | 832.9219, 885.2603, 922.6961,         |
|        | C | -1.67730311 | -0.93144140 | 0.57579781  | 934.5305, 986.0185, 1022.1374,        |
|        | H | -1.60146217 | -0.39288777 | 1.52359274  | 1056.4933, 1082.5184, 1096.4795,      |
|        | H | -1.44492821 | -1.97879398 | 0.79649496  | 1108.1527, 1155.9482, 1166.5496,      |
|        | C | 0.77808109  | -0.46234077 | 0.11740011  | 1211.8088, 1263.1741, 1280.5090,      |
|        | H | 1.02832493  | -1.50710839 | 0.33144691  | 1295.6499, 1314.4807, 1329.6526,      |
|        | H | 0.83825314  | 0.07032378  | 1.06993194  | 1336.1498, 1352.5962, 1363.9822,      |
|        | C | 1.79725902  | 0.10846528  | -0.86216857 | 1378.7752, 1398.1396, 1412.9418,      |
|        | H | 1.59205657  | 1.17336890  | -1.00961587 | 1416.2918, 1454.4569, 1480.9096,      |
|        | H | 1.65575130  | -0.36936822 | -1.83520810 | 1484.0571, 1492.2058, 1494.3079,      |
|        | C | 3.24880316  | -0.06882408 | -0.42355912 | 1505.6390, 1509.7702, 1512.8496,      |
|        | H | 3.46448479  | -1.13594312 | -0.32281696 | 1524.3743, 3029.3210, 3032.0016,      |
|        | H | 3.90482380  | 0.30449477  | -1.21217866 | 3037.7460, 3043.0626, 3048.0497,      |
|        | C | 3.58045048  | 0.64276360  | 0.88364230  | 3058.8931, 3065.2872, 3070.0814,      |
|        | H | 3.03574225  | 0.21236158  | 1.72350367  | 3080.9201, 3086.0140, 3089.7070,      |
|        | H | 3.31773015  | 1.70064869  | 0.82427078  | 3098.8305, 3125.9332, 3135.7266,      |
|        | H | 4.64361911  | 0.57421062  | 1.11153630  | 3152.0490, 3787.1109                  |
|        | O | -3.52519465 | 1.70898195  | -0.12065741 |                                       |
|        | H | -4.12306602 | 1.70840255  | 0.64332493  |                                       |
| SP1_16 | C | 2.61481001  | -1.04898616 | -0.40504440 | 704.6300i, 31.0364, 48.6237, 66.1501, |
|        | H | 2.30105029  | -1.39710420 | -1.38934288 | 82.0188, 128.6865, 140.9165,          |
|        | H | 2.98925455  | 0.03436389  | -0.59232849 | 149.8144, 201.5240, 276.4768,         |
|        | H | 3.47272881  | -1.62353477 | -0.06067290 | 291.8169, 325.4813, 383.1279,         |
|        | C | 0.32855615  | -0.10655669 | 0.11062178  | 409.4117, 505.4628, 719.5559,         |
|        | H | 0.70505228  | 0.90211380  | -0.08461130 | 731.7317, 785.1059, 792.1920,         |
|        | H | -0.03094151 | -0.49417818 | -0.84712055 | 844.8000, 860.0775, 923.6148,         |
|        | C | 1.48059771  | -0.97913685 | 0.59301263  | 932.8852, 970.8009, 1032.5090,        |
|        | H | 1.11264223  | -1.99159818 | 0.79185995  | 1032.6206, 1077.0009, 1093.2212,      |
|        | H | 1.85353746  | -0.59460679 | 1.54535783  | 1117.9283, 1151.0010, 1166.4528,      |
|        | C | -0.81954380 | -0.04291873 | 1.11037637  | 1197.5749, 1262.3698, 1283.6390,      |
|        | H | -0.42381264 | 0.25322443  | 2.08533347  | 1294.3533, 1305.1905, 1330.4432,      |
|        | H | -1.23598172 | -1.04514970 | 1.24555655  | 1337.1170, 1362.2667, 1367.4252,      |
|        | C | -1.92734163 | 0.93199987  | 0.71399662  | 1386.3577, 1391.3106, 1412.2660,      |
|        | H | -1.52457642 | 1.94793309  | 0.72744720  | 1414.4320, 1453.3506, 1479.9943,      |
|        | H | -2.71472979 | 0.89899743  | 1.47180539  |                                       |
| SP1_17 | C | 2.61481001  | -1.04898616 | -0.40504440 | 704.6300i, 31.0364, 48.6237, 66.1501, |
|        | H | 2.30105029  | -1.39710420 | -1.38934288 | 82.0188, 128.6865, 140.9165,          |
|        | H | 2.98925455  | 0.03436389  | -0.59232849 | 149.8144, 201.5240, 276.4768,         |
|        | H | 3.47272881  | -1.62353477 | -0.06067290 | 291.8169, 325.4813, 383.1279,         |
|        | C | 0.32855615  | -0.10655669 | 0.11062178  | 409.4117, 505.4628, 719.5559,         |
|        | H | 0.70505228  | 0.90211380  | -0.08461130 | 731.7317, 785.1059, 792.1920,         |
|        | H | -0.03094151 | -0.49417818 | -0.84712055 | 844.8000, 860.0775, 923.6148,         |
|        | C | 1.48059771  | -0.97913685 | 0.59301263  | 932.8852, 970.8009, 1032.5090,        |
|        | H | 1.11264223  | -1.99159818 | 0.79185995  | 1032.6206, 1077.0009, 1093.2212,      |
|        | H | 1.85353746  | -0.59460679 | 1.54535783  | 1117.9283, 1151.0010, 1166.4528,      |
|        | C | -0.81954380 | -0.04291873 | 1.11037637  | 1197.5749, 1262.3698, 1283.6390,      |
|        | H | -0.42381264 | 0.25322443  | 2.08533347  | 1294.3533, 1305.1905, 1330.4432,      |
|        | H | -1.23598172 | -1.04514970 | 1.24555655  | 1337.1170, 1362.2667, 1367.4252,      |
|        | C | -1.92734163 | 0.93199987  | 0.71399662  | 1386.3577, 1391.3106, 1412.2660,      |
|        | H | -1.52457642 | 1.94793309  | 0.72744720  | 1414.4320, 1453.3506, 1479.9943,      |
|        | H | -2.71472979 | 0.89899743  | 1.47180539  |                                       |

|        |             |             |             |                                  |                                       |
|--------|-------------|-------------|-------------|----------------------------------|---------------------------------------|
|        | C           | -2.55029582 | 0.66327781  | -0.65583991                      | 1482.1550, 1495.0762, 1497.6167,      |
|        | H           | -3.34617130 | 1.39092437  | -0.82453641                      | 1502.4482, 1506.7376, 1517.1916,      |
|        | H           | -1.80938947 | 0.83890322  | -1.43864259                      | 1524.0221, 3030.3336, 3038.1945,      |
|        | C           | -3.11568439 | -0.74553786 | -0.79429686                      | 3043.8519, 3048.4515, 3055.8527,      |
|        | H           | -3.81928399 | -0.96176508 | 0.01195874                       | 3060.1947, 3065.4466, 3073.5507,      |
|        | H           | -2.32727889 | -1.49805785 | -0.75400564                      | 3081.9282, 3088.0905, 3094.1962,      |
|        | H           | -3.64117859 | -0.86975877 | -1.74043703                      | 3097.3099, 3122.3451, 3131.2204,      |
|        | O           | 3.50562962  | 1.37805528  | -0.51643130                      | 3152.6669, 3788.4836                  |
|        | H           | 4.32745233  | 1.15200267  | -0.05312825                      |                                       |
| SP1_18 | C           | 2.22917392  | -1.32635067 | 0.00162737                       | 703.5861i, 30.4315, 46.8614, 65.2273, |
|        | H           | 2.03783771  | -1.79945361 | -0.96189580                      | 75.3250, 94.7758, 151.2540, 204.0684, |
|        | H           | 3.09489568  | -0.58316187 | -0.21419614                      | 211.4074, 250.7211, 291.4842,         |
|        | H           | 2.61202177  | -2.05971540 | 0.70898476                       | 312.2468, 332.7974, 429.3757,         |
|        | C           | 0.58742435  | 0.52503763  | -0.48121792                      | 528.3823, 715.6774, 739.8630,         |
|        | H           | 1.44811988  | 1.13532200  | -0.76338504                      | 779.4073, 786.3985, 852.2592,         |
|        | H           | 0.25057955  | 0.02785124  | -1.39505198                      | 871.6422, 890.4191, 943.8285,         |
|        | C           | 1.05104145  | -0.53007820 | 0.51690948                       | 966.8149, 1046.5393, 1051.6612,       |
|        | H           | 0.23093989  | -1.21912731 | 0.74326360                       | 1063.3311, 1072.7593, 1121.2616,      |
|        | H           | 1.31665697  | -0.04626592 | 1.46085030                       | 1146.5062, 1176.3670, 1207.8184,      |
|        | C           | -0.51539264 | 1.43499281  | 0.05678364                       | 1251.6649, 1290.5024, 1295.5357,      |
|        | H           | -0.80305811 | 2.14004107  | -0.72726220                      | 1317.8214, 1323.5123, 1336.7439,      |
|        | H           | -0.10944909 | 2.03373775  | 0.87622403                       | 1346.3723, 1365.1929, 1391.7418,      |
|        | C           | -1.76473752 | 0.70421486  | 0.54702071                       | 1399.9387, 1410.7835, 1412.6117,      |
|        | H           | -2.49878096 | 1.44413470  | 0.87687891                       | 1453.1295, 1479.2885, 1487.1954,      |
|        | H           | -1.52563853 | 0.10532470  | 1.43069814                       | 1493.6383, 1498.4393, 1503.7077,      |
|        | C           | -2.40913340 | -0.19363920 | -0.50302090                      | 1504.3569, 1513.9618, 1523.7803,      |
|        | H           | -2.57943292 | 0.38570734  | -1.41495585                      | 3034.5361, 3039.8637, 3046.0192,      |
| H      | -1.71989133 | -0.99655381 | -0.77540617 | 3048.5563, 3051.0961, 3056.7826, |                                       |
| C      | -3.72150077 | -0.79735524 | -0.01984885 | 3067.1985, 3069.5512, 3081.7555, |                                       |
| H      | -4.44313534 | -0.01514803 | 0.21959582  | 3086.7127, 3092.0751, 3098.3183, |                                       |
| H      | -3.56493325 | -1.38847573 | 0.88389074  | 3122.5829, 3131.4988, 3151.4301, |                                       |
| H      | -4.16796153 | -1.44737714 | -0.77154174 | 3790.7949                        |                                       |
| O      | 4.13396406  | 0.41592141  | -0.18351055 |                                  |                                       |
| H      | 4.60826470  | 0.05485681  | 0.58187177  |                                  |                                       |
| SP1_19 | C           | -2.52900665 | -0.15992988 | -0.57922419                      | 786.7960i, 40.2819, 50.4378, 66.9085, |
|        | H           | -3.17543342 | -0.51124881 | 0.22553661                       | 109.8244, 146.9501, 150.9182,         |
|        | H           | -2.19675762 | 0.90782940  | -0.23497444                      | 187.8692, 241.7883, 288.1460,         |
|        | H           | -3.11788434 | 0.04862760  | -1.47030333                      | 300.8076, 352.3701, 371.8210,         |
|        | C           | -0.63626154 | -1.54306479 | 0.42458002                       | 441.0731, 519.2446, 680.9392,         |
|        | H           | -1.34841509 | -2.07670068 | 1.05893859                       | 732.6232, 765.8459, 809.0907,         |
|        | H           | 0.13375528  | -2.26793517 | 0.15384694                       | 863.9864, 878.6718, 898.1773,         |
|        | C           | -1.35841857 | -1.08453527 | -0.84085889                      | 947.0605, 962.6502, 1001.3274,        |
|        | H           | -1.73673722 | -1.96793607 | -1.36353298                      | 1030.5621, 1056.5927, 1071.9222,      |
|        | H           | -0.65659219 | -0.61102305 | -1.53169702                      | 1085.1875, 1128.1174, 1156.7670,      |
|        | C           | -0.01122285 | -0.40973054 | 1.23826660                       | 1165.1284, 1233.0448, 1243.8867,      |
|        | H           | 0.48640169  | -0.83841855 | 2.11163791                       | 1279.3514, 1311.1269, 1322.6244,      |
|        | H           | -0.80545998 | 0.23128163  | 1.62925415                       | 1327.7323, 1345.8070, 1372.0576,      |
|        | C           | 1.00349924  | 0.43434207  | 0.46670789                       | 1389.6402, 1401.6313, 1408.7751,      |
|        | H           | 1.36387988  | 1.23842502  | 1.11552075                       | 1414.0629, 1448.5159, 1478.8396,      |
|        | H           | 0.52602006  | 0.92050088  | -0.39098560                      | 1492.4212, 1497.1338, 1500.9902,      |
|        | C           | 2.20291980  | -0.35652691 | -0.04579875                      | 1504.1040, 1507.2385, 1514.7630,      |
|        | H           | 2.64351793  | -0.91528600 | 0.78444011                       | 1536.5656, 3028.6644, 3043.4595,      |
| H      | 1.86805562  | -1.09876307 | -0.77373034 | 3047.5389, 3049.3353, 3056.2470, |                                       |
| C      | 3.25487802  | 0.54005910  | -0.68549507 | 3057.5535, 3063.5156, 3075.5379, |                                       |
| H      | 3.63553655  | 1.26607163  | 0.03408459  | 3081.3673, 3088.8941, 3091.3072, |                                       |
| H      | 2.83140301  | 1.09633887  | -1.52308438 | 3100.5343, 3123.9338, 3133.4492, |                                       |
| H      | 4.09999649  | -0.03616827 | -1.05996137 | 3155.7592, 3786.7750             |                                       |
| O      | -1.89224147 | 2.25023418  | 0.12272473  |                                  |                                       |

|        |             |             |             |             |                                                                                                                                                                                                                                                                                                                                                                                                                                                                                                                                                                                                                                                                                                                                                             |
|--------|-------------|-------------|-------------|-------------|-------------------------------------------------------------------------------------------------------------------------------------------------------------------------------------------------------------------------------------------------------------------------------------------------------------------------------------------------------------------------------------------------------------------------------------------------------------------------------------------------------------------------------------------------------------------------------------------------------------------------------------------------------------------------------------------------------------------------------------------------------------|
|        | H           | -0.97167962 | 2.08884855  | 0.38414640  |                                                                                                                                                                                                                                                                                                                                                                                                                                                                                                                                                                                                                                                                                                                                                             |
| SP1_20 | C           | -2.62815014 | 0.41386578  | -0.28497814 | 756.2548i, 39.1288, 57.7330, 81.3910, 104.2152, 135.1724, 145.8328, 211.4362, 227.1695, 260.9891, 307.6478, 347.9428, 365.6749, 445.1855, 503.4794, 660.7962, 740.0219, 764.4722, 823.7879, 858.0421, 866.2729, 910.3981, 957.3182, 966.5756, 1011.5042, 1047.5394, 1063.1888, 1095.0432, 1117.2129, 1125.8134, 1159.3820, 1179.1130, 1228.1936, 1255.4114, 1288.5411, 1300.5486, 1332.1612, 1334.4468, 1348.5163, 1385.2460, 1386.1081, 1395.6580, 1409.6814, 1416.7999, 1440.0241, 1484.9366, 1489.7880, 1492.1764, 1495.6660, 1506.3882, 1509.8740, 1513.6139, 1514.6231, 3030.8160, 3038.5173, 3042.4724, 3050.9719, 3052.9611, 3060.1805, 3062.9410, 3075.8186, 3083.6507, 3085.6252, 3095.1250, 3100.3147, 3127.4979, 3139.5887, 3154.9552, 3780.6383 |
|        | H           | -3.51246287 | 0.87546408  | 0.14954257  |                                                                                                                                                                                                                                                                                                                                                                                                                                                                                                                                                                                                                                                                                                                                                             |
|        | H           | -1.85093456 | 1.28361978  | -0.29877197 |                                                                                                                                                                                                                                                                                                                                                                                                                                                                                                                                                                                                                                                                                                                                                             |
|        | H           | -2.79819339 | 0.18941569  | -1.33870991 |                                                                                                                                                                                                                                                                                                                                                                                                                                                                                                                                                                                                                                                                                                                                                             |
|        | C           | -1.03884298 | -1.58066034 | -0.20622228 |                                                                                                                                                                                                                                                                                                                                                                                                                                                                                                                                                                                                                                                                                                                                                             |
|        | H           | -0.77803771 | -2.44690051 | 0.40744696  |                                                                                                                                                                                                                                                                                                                                                                                                                                                                                                                                                                                                                                                                                                                                                             |
|        | H           | -1.45162244 | -1.97488144 | -1.13831053 |                                                                                                                                                                                                                                                                                                                                                                                                                                                                                                                                                                                                                                                                                                                                                             |
|        | C           | -2.13326657 | -0.78206803 | 0.50188850  |                                                                                                                                                                                                                                                                                                                                                                                                                                                                                                                                                                                                                                                                                                                                                             |
|        | H           | -1.79987698 | -0.46084482 | 1.49101584  |                                                                                                                                                                                                                                                                                                                                                                                                                                                                                                                                                                                                                                                                                                                                                             |
|        | H           | -2.98253608 | -1.44761974 | 0.68112309  |                                                                                                                                                                                                                                                                                                                                                                                                                                                                                                                                                                                                                                                                                                                                                             |
|        | C           | 0.23247203  | -0.79483369 | -0.52405642 |                                                                                                                                                                                                                                                                                                                                                                                                                                                                                                                                                                                                                                                                                                                                                             |
|        | H           | -0.00966479 | 0.06956835  | -1.14973066 |                                                                                                                                                                                                                                                                                                                                                                                                                                                                                                                                                                                                                                                                                                                                                             |
|        | H           | 0.88818048  | -1.42923274 | -1.12267352 |                                                                                                                                                                                                                                                                                                                                                                                                                                                                                                                                                                                                                                                                                                                                                             |
|        | C           | 0.98904656  | -0.32867129 | 0.71712484  |                                                                                                                                                                                                                                                                                                                                                                                                                                                                                                                                                                                                                                                                                                                                                             |
|        | H           | 1.32558034  | -1.20541423 | 1.27973027  |                                                                                                                                                                                                                                                                                                                                                                                                                                                                                                                                                                                                                                                                                                                                                             |
|        | H           | 0.31015291  | 0.20351315  | 1.39129631  |                                                                                                                                                                                                                                                                                                                                                                                                                                                                                                                                                                                                                                                                                                                                                             |
|        | C           | 2.19152127  | 0.56223642  | 0.40697557  |                                                                                                                                                                                                                                                                                                                                                                                                                                                                                                                                                                                                                                                                                                                                                             |
|        | H           | 1.85543282  | 1.45239524  | -0.13411125 |                                                                                                                                                                                                                                                                                                                                                                                                                                                                                                                                                                                                                                                                                                                                                             |
| H      | 2.62487316  | 0.91412336  | 1.34493288  |             |                                                                                                                                                                                                                                                                                                                                                                                                                                                                                                                                                                                                                                                                                                                                                             |
| C      | 3.26856003  | -0.14013786 | -0.41260226 |             |                                                                                                                                                                                                                                                                                                                                                                                                                                                                                                                                                                                                                                                                                                                                                             |
| H      | 2.91075731  | -0.39421865 | -1.40962558 |             |                                                                                                                                                                                                                                                                                                                                                                                                                                                                                                                                                                                                                                                                                                                                                             |
| H      | 3.58302506  | -1.06437192 | 0.07566358  |             |                                                                                                                                                                                                                                                                                                                                                                                                                                                                                                                                                                                                                                                                                                                                                             |
| H      | 4.14719452  | 0.49274945  | -0.52986345 |             |                                                                                                                                                                                                                                                                                                                                                                                                                                                                                                                                                                                                                                                                                                                                                             |
| O      | -0.93384237 | 2.36973802  | -0.15747264 |             |                                                                                                                                                                                                                                                                                                                                                                                                                                                                                                                                                                                                                                                                                                                                                             |
| H      | -0.27917006 | 1.88634479  | 0.37204768  |             |                                                                                                                                                                                                                                                                                                                                                                                                                                                                                                                                                                                                                                                                                                                                                             |
| SP1_21 | C           | -2.66087316 | 0.28040903  | 0.59717024  | 777.6506i, 34.0176, 61.6505, 72.6272, 80.5689, 123.0532, 150.4969, 172.6561, 206.0092, 270.6600, 310.5151, 321.9882, 347.2081, 463.3607, 468.1758, 663.1620, 752.8779, 778.3150, 824.2606, 842.7817, 884.4929, 915.2436, 950.9198, 983.4330, 1017.4212, 1037.2344, 1076.3038, 1102.4980, 1113.0943, 1134.2665, 1169.0919, 1212.2983, 1241.0831, 1259.3543, 1289.8418, 1312.3769, 1320.0216, 1336.7632, 1339.2154, 1377.6674, 1382.9237, 1392.9865, 1409.8201, 1416.7105, 1434.3509, 1480.5895, 1487.1238, 1491.7778, 1493.6768, 1501.6466, 1506.0944, 1513.3390, 1516.7807, 3001.5196, 3037.1667, 3041.2184, 3042.9025, 3048.1470, 3057.8292, 3070.5223, 3073.6693, 3079.7232, 3086.8527, 3087.9857, 3103.1282, 3124.7648, 3134.4034, 3154.8534, 3784.7323  |
|        | H           | -2.38711238 | 0.17264868  | 1.64740016  |                                                                                                                                                                                                                                                                                                                                                                                                                                                                                                                                                                                                                                                                                                                                                             |
|        | H           | -2.10837526 | 1.24361922  | 0.24059038  |                                                                                                                                                                                                                                                                                                                                                                                                                                                                                                                                                                                                                                                                                                                                                             |
|        | H           | -3.71074493 | 0.55180773  | 0.50662749  |                                                                                                                                                                                                                                                                                                                                                                                                                                                                                                                                                                                                                                                                                                                                                             |
|        | C           | -0.89491582 | -1.48260362 | 0.05701745  |                                                                                                                                                                                                                                                                                                                                                                                                                                                                                                                                                                                                                                                                                                                                                             |
|        | H           | -0.85589530 | -1.80233050 | 1.10290857  |                                                                                                                                                                                                                                                                                                                                                                                                                                                                                                                                                                                                                                                                                                                                                             |
|        | H           | -0.73254355 | -2.37924104 | -0.54608172 |                                                                                                                                                                                                                                                                                                                                                                                                                                                                                                                                                                                                                                                                                                                                                             |
|        | C           | -2.28328710 | -0.92323368 | -0.24260070 |                                                                                                                                                                                                                                                                                                                                                                                                                                                                                                                                                                                                                                                                                                                                                             |
|        | H           | -3.02435270 | -1.70906358 | -0.07212813 |                                                                                                                                                                                                                                                                                                                                                                                                                                                                                                                                                                                                                                                                                                                                                             |
|        | H           | -2.35675159 | -0.66526664 | -1.30292775 |                                                                                                                                                                                                                                                                                                                                                                                                                                                                                                                                                                                                                                                                                                                                                             |
|        | C           | 0.23874202  | -0.49723187 | -0.19961544 |                                                                                                                                                                                                                                                                                                                                                                                                                                                                                                                                                                                                                                                                                                                                                             |
|        | H           | 0.11306106  | 0.37369967  | 0.44682448  |                                                                                                                                                                                                                                                                                                                                                                                                                                                                                                                                                                                                                                                                                                                                                             |
|        | H           | 0.17764315  | -0.14114135 | -1.23690928 |                                                                                                                                                                                                                                                                                                                                                                                                                                                                                                                                                                                                                                                                                                                                                             |
|        | C           | 1.61811957  | -1.10352619 | 0.03080455  |                                                                                                                                                                                                                                                                                                                                                                                                                                                                                                                                                                                                                                                                                                                                                             |
|        | H           | 1.70335159  | -2.02481127 | -0.55123428 |                                                                                                                                                                                                                                                                                                                                                                                                                                                                                                                                                                                                                                                                                                                                                             |
|        | H           | 1.70655898  | -1.39274869 | 1.08274555  |                                                                                                                                                                                                                                                                                                                                                                                                                                                                                                                                                                                                                                                                                                                                                             |
|        | C           | 2.76840416  | -0.16793506 | -0.33361714 |                                                                                                                                                                                                                                                                                                                                                                                                                                                                                                                                                                                                                                                                                                                                                             |
|        | H           | 3.71278678  | -0.69619839 | -0.19081715 |                                                                                                                                                                                                                                                                                                                                                                                                                                                                                                                                                                                                                                                                                                                                                             |
| H      | 2.70909050  | 0.07259118  | -1.39864794 |             |                                                                                                                                                                                                                                                                                                                                                                                                                                                                                                                                                                                                                                                                                                                                                             |
| C      | 2.78507798  | 1.12197120  | 0.47978706  |             |                                                                                                                                                                                                                                                                                                                                                                                                                                                                                                                                                                                                                                                                                                                                                             |
| H      | 2.78836396  | 0.90362213  | 1.54933826  |             |                                                                                                                                                                                                                                                                                                                                                                                                                                                                                                                                                                                                                                                                                                                                                             |
| H      | 1.91316437  | 1.74275886  | 0.27280045  |             |                                                                                                                                                                                                                                                                                                                                                                                                                                                                                                                                                                                                                                                                                                                                                             |
| H      | 3.67070325  | 1.71582350  | 0.25716672  |             |                                                                                                                                                                                                                                                                                                                                                                                                                                                                                                                                                                                                                                                                                                                                                             |
| O      | -1.48500325 | 2.35504009  | -0.40132540 |             |                                                                                                                                                                                                                                                                                                                                                                                                                                                                                                                                                                                                                                                                                                                                                             |
| H      | -0.86652770 | 1.82681083  | -0.93072878 |             |                                                                                                                                                                                                                                                                                                                                                                                                                                                                                                                                                                                                                                                                                                                                                             |
| SP1_22 | C           | -2.50107655 | -0.69231896 | -0.18052239 | 779.4740i, 48.3290, 68.8382, 76.4030, 120.3053, 144.2011, 165.4538, 203.8402, 235.6797, 301.4576, 342.2637, 358.6922, 394.8715, 448.4002, 525.1933, 687.7068, 720.8363, 769.1763, 816.3922,                                                                                                                                                                                                                                                                                                                                                                                                                                                                                                                                                                 |
|        | H           | -2.84466227 | -1.03641514 | 0.79535790  |                                                                                                                                                                                                                                                                                                                                                                                                                                                                                                                                                                                                                                                                                                                                                             |
|        | H           | -2.43083481 | 0.46981820  | -0.07443570 |                                                                                                                                                                                                                                                                                                                                                                                                                                                                                                                                                                                                                                                                                                                                                             |
|        | H           | -3.29029045 | -0.81344348 | -0.92011613 |                                                                                                                                                                                                                                                                                                                                                                                                                                                                                                                                                                                                                                                                                                                                                             |
|        | C           | -0.13604153 | -1.35742315 | 0.50442106  |                                                                                                                                                                                                                                                                                                                                                                                                                                                                                                                                                                                                                                                                                                                                                             |
|        | H           | -0.52866733 | -1.93965232 | 1.34179103  |                                                                                                                                                                                                                                                                                                                                                                                                                                                                                                                                                                                                                                                                                                                                                             |
| H      | 0.74245994  | -1.89667995 | 0.14270026  |             |                                                                                                                                                                                                                                                                                                                                                                                                                                                                                                                                                                                                                                                                                                                                                             |

|  |   |             |             |             |                                       |
|--|---|-------------|-------------|-------------|---------------------------------------|
|  | C | -1.18904103 | -1.32102457 | -0.60180257 | 848.4492, 877.6578, 894.5299,         |
|  | H | -1.39298735 | -2.34745291 | -0.92032355 | 951.1562, 960.7683, 1007.3441,        |
|  | H | -0.79882829 | -0.80889220 | -1.48454875 | 1009.4659, 1054.0446, 1067.1023,      |
|  | C | 0.28492810  | 0.01888118  | 1.01721836  | 1085.7577, 1127.8694, 1152.9892,      |
|  | H | 1.02850119  | -0.11003961 | 1.80599699  | 1165.1975, 1224.2305, 1235.3942,      |
|  | H | -0.57084289 | 0.50030298  | 1.49788333  | 1278.2851, 1302.9616, 1322.1257,      |
|  | C | 0.85304630  | 0.94031830  | -0.06479418 | 1335.9649, 1362.2983, 1376.0836,      |
|  | H | 1.14889545  | 1.88588413  | 0.39917388  | 1385.3976, 1403.9611, 1404.8313,      |
|  | H | 0.07741792  | 1.18154968  | -0.79707985 | 1416.8585, 1448.0882, 1477.1129,      |
|  | C | 2.05409284  | 0.36372642  | -0.81566178 | 1487.6287, 1495.9227, 1502.1095,      |
|  | H | 1.73983623  | -0.50525694 | -1.39879806 | 1505.9837, 1511.0970, 1519.0717,      |
|  | H | 2.39804543  | 1.10434276  | -1.53949249 | 1541.9387, 3038.2563, 3043.8373,      |
|  | C | 3.20943861  | -0.02626485 | 0.09886135  | 3051.9700, 3054.2994, 3058.5816,      |
|  | H | 2.94141420  | -0.85770466 | 0.75125661  | 3061.4384, 3074.7736, 3076.4155,      |
|  | H | 3.50067853  | 0.81225465  | 0.73420080  | 3085.6604, 3090.6888, 3096.2743,      |
|  | H | 4.08260294  | -0.32881181 | -0.47771204 | 3097.6245, 3124.0357, 3134.3943,      |
|  | O | -2.46603954 | 1.89059472  | 0.02071408  | 3154.8228, 3788.1698                  |
|  | H | -1.52650253 | 2.01007262  | 0.23211409  |                                       |
|  | C | -2.76591744 | 0.12909484  | -0.46133831 |                                       |
|  | H | -3.80908772 | 0.38591924  | -0.28751487 | 769.9379i, 37.0006, 59.7483, 89.5052, |
|  | H | -2.22881784 | 1.15975832  | -0.36911058 | 103.8788, 116.7278, 132.3329,         |
|  | H | -2.62079434 | -0.18165358 | -1.49656801 | 199.9426, 207.6564, 278.9906,         |
|  | C | -0.86986873 | -1.46014407 | 0.16292708  | 306.2777, 314.4879, 336.6965,         |
|  | H | -0.57474654 | -2.19256163 | 0.91856679  | 461.3540, 473.5965, 672.8356,         |
|  | H | -0.97121651 | -2.01060029 | -0.77727756 | 752.7642, 778.8243, 828.2623,         |
|  | C | -2.22314075 | -0.86625154 | 0.54409180  | 847.6524, 878.8769, 911.5389,         |
|  | H | -2.15434015 | -0.38856819 | 1.52515574  | 954.7119, 978.7295, 1019.8155,        |
|  | H | -2.94613488 | -1.67930611 | 0.65299413  | 1035.1576, 1076.7115, 1103.3090,      |
|  | C | 0.24344028  | -0.42977382 | 0.01354563  | 1113.8631, 1134.6328, 1176.9394,      |
|  | H | 0.28042608  | 0.18193252  | 0.92185643  | 1205.3117, 1245.6418, 1258.6337,      |
|  | H | 0.01580782  | 0.24109073  | -0.82168633 | 1293.4857, 1302.2777, 1323.6698,      |
|  | C | 1.60766718  | -1.06712994 | -0.22674386 | 1329.1884, 1334.5268, 1378.1189,      |
|  | H | 1.51914515  | -1.78758004 | -1.04409807 | 1384.5948, 1389.6811, 1407.0880,      |
|  | H | 1.89437580  | -1.64025495 | 0.66036734  | 1415.0279, 1436.1218, 1480.3669,      |
|  | C | 2.70843981  | -0.06295553 | -0.55910637 | 1486.9131, 1492.5725, 1493.5038,      |
|  | H | 3.63643493  | -0.60508231 | -0.74902644 | 1505.2940, 1506.9987, 1511.2617,      |
|  | H | 2.45482466  | 0.45026587  | -1.49033457 | 1520.6278, 3020.2392, 3037.6536,      |
|  | C | 2.94358913  | 0.96707044  | 0.54032452  | 3042.6587, 3045.0777, 3049.9225,      |
|  | H | 3.12736745  | 0.47689855  | 1.49827601  | 3056.2987, 3058.8928, 3073.3290,      |
|  | H | 2.08380666  | 1.62591969  | 0.66481850  | 3079.9987, 3086.1804, 3089.6714,      |
|  | H | 3.80415043  | 1.59543119  | 0.31470262  | 3094.7821, 3124.1558, 3133.3137,      |
|  | O | -1.57947892 | 2.39007730  | -0.05329910 | 3154.9081, 3788.1530                  |
|  | H | -0.74062652 | 1.98831028  | 0.22306868  |                                       |
|  | C | 2.30175218  | -0.34601463 | 0.95666208  |                                       |
|  | H | 3.32672417  | -0.56727471 | 1.24778533  | 765.9990i, 42.1931, 61.1492, 95.8332, |
|  | H | 2.39569022  | 0.70441693  | 0.46089810  | 120.6099, 130.0940, 165.4096,         |
|  | H | 1.68262797  | -0.19229304 | 1.84161573  | 186.5758, 251.0939, 276.2377,         |
|  | C | 0.21295115  | -1.24831604 | -0.19243199 | 307.1733, 326.6223, 358.0636,         |
|  | H | -0.13425028 | -2.05553700 | -0.84327663 | 445.1009, 529.7162, 672.0606,         |
|  | H | -0.27097943 | -1.40314674 | 0.77614550  | 739.7633, 798.5819, 817.0170,         |
|  | C | 1.72332903  | -1.36373927 | -0.00597025 | 845.4914, 867.4919, 910.7846,         |
|  | H | 2.22573130  | -1.27629812 | -0.97320742 | 949.4403, 973.1060, 1011.7742,        |
|  | H | 1.95621915  | -2.36470253 | 0.36741942  | 1042.8549, 1062.3256, 1096.8308,      |
|  | C | -0.23717429 | 0.08637758  | -0.77687715 | 1122.0463, 1133.9922, 1168.0314,      |
|  | H | 0.33743794  | 0.28236600  | -1.68916040 | 1195.5111, 1240.7879, 1258.9091,      |
|  | H | -0.00353626 | 0.89076021  | -0.07418310 | 1286.0382, 1309.7528, 1319.7255,      |
|  | C | -1.72572434 | 0.13033021  | -1.12088204 | 1329.0668, 1340.8514, 1378.0248,      |
|  | H | -1.92509874 | -0.58308787 | -1.92454640 | 1386.6917, 1390.1508, 1406.3722,      |

|        |             |             |             |                                  |                                       |
|--------|-------------|-------------|-------------|----------------------------------|---------------------------------------|
|        | H           | -1.96844105 | 1.12043469  | -1.51533286                      | 1415.6612, 1437.5760, 1480.3583,      |
|        | C           | -2.65273196 | -0.17222803 | 0.05665069                       | 1485.8155, 1495.6981, 1498.3068,      |
|        | H           | -3.68565283 | -0.07640161 | -0.28235427                      | 1504.7162, 1509.5285, 1510.6079,      |
|        | H           | -2.53131865 | -1.21303378 | 0.36427192                       | 1525.0821, 3022.5751, 3040.9563,      |
|        | C           | -2.42528391 | 0.74438382  | 1.25320458                       | 3045.5337, 3046.2130, 3055.6093,      |
|        | H           | -2.48803282 | 1.79299527  | 0.95661410                       | 3061.3388, 3066.7662, 3072.9205,      |
|        | H           | -1.44174014 | 0.58669857  | 1.69792470                       | 3081.1742, 3086.5421, 3093.8131,      |
|        | H           | -3.16861090 | 0.57064649  | 2.03016752                       | 3096.1656, 3122.5289, 3132.7872,      |
|        | O           | 2.58343912  | 1.88488882  | -0.31756417                      | 3153.3122, 3787.1692                  |
|        | H           | 1.84301020  | 1.71958477  | -0.92240345                      |                                       |
| SP1_25 | C           | -2.64790613 | -0.54660101 | 0.77080106                       | 763.8030i, 45.7240, 66.4379, 78.0457, |
|        | H           | -2.15173572 | -0.62973113 | 1.73840620                       | 108.7716, 117.8785, 141.6097,         |
|        | H           | -2.69728824 | 0.59623773  | 0.54859166                       | 158.8376, 245.7948, 277.0502,         |
|        | H           | -3.69745085 | -0.81991460 | 0.86065534                       | 288.3031, 296.5707, 330.7238,         |
|        | C           | -0.41251503 | -1.14491203 | -0.30320254                      | 416.8618, 545.0880, 671.2865,         |
|        | H           | -0.04090282 | -1.52851034 | 0.65031878                       | 739.3716, 786.4394, 818.5459,         |
|        | H           | 0.02714181  | -1.77263742 | -1.08329229                      | 850.3894, 875.8565, 908.6840,         |
|        | C           | -1.93092794 | -1.29741652 | -0.33303510                      | 950.2315, 974.4394, 1034.8462,        |
|        | H           | -2.17929557 | -2.35878115 | -0.24594701                      | 1054.1150, 1066.8484, 1089.9268,      |
|        | H           | -2.31739602 | -0.97424125 | -1.30354573                      | 1118.7817, 1134.3915, 1177.0204,      |
|        | C           | 0.06776370  | 0.29027787  | -0.49806682                      | 1202.3374, 1245.6514, 1260.5209,      |
|        | H           | -0.23792413 | 0.89758201  | 0.35965533                       | 1297.7961, 1304.5969, 1324.4853,      |
|        | H           | -0.42757843 | 0.70579344  | -1.38315472                      | 1326.2085, 1336.5694, 1351.9252,      |
|        | C           | 1.57880948  | 0.41416449  | -0.67685481                      | 1388.1195, 1404.2459, 1405.4664,      |
|        | H           | 1.83256117  | 1.45955776  | -0.87126368                      | 1412.8103, 1438.7833, 1481.3466,      |
|        | H           | 1.88512836  | -0.14713601 | -1.56514621                      | 1487.7201, 1493.4562, 1498.0952,      |
|        | C           | 2.38639840  | -0.07073775 | 0.52252762                       | 1503.5841, 1510.7317, 1512.3797,      |
| H      | 2.01964251  | 0.42614131  | 1.42524036  | 1514.6228, 3017.0266, 3036.1056, |                                       |
| H      | 2.22301997  | -1.13994635 | 0.67011280  | 3041.2835, 3046.7106, 3049.1648, |                                       |
| C      | 3.87717321  | 0.19409749  | 0.35621947  | 3057.9060, 3060.6212, 3069.7598, |                                       |
| H      | 4.07182874  | 1.26191220  | 0.24786846  | 3073.3140, 3086.3151, 3093.2540, |                                       |
| H      | 4.26069781  | -0.30343771 | -0.53580013 | 3096.3120, 3124.6781, 3133.5985, |                                       |
| H      | 4.44769745  | -0.16601175 | 1.21145526  | 3154.4464, 3791.1481             |                                       |
| O      | -2.81505870 | 1.94151865  | 0.08749153  |                                  |                                       |
| H      | -2.01045056 | 1.92773876  | -0.45441998 |                                  |                                       |
| SP1_26 | C           | -2.42104887 | -0.49511151 | 0.34268964                       | 677.9125i, 36.6065, 40.8135, 60.2137, |
|        | H           | -2.40587052 | -0.46060861 | 1.43250099                       | 78.7383, 94.7022, 116.0469, 138.9587, |
|        | H           | -3.53359773 | -0.59439828 | 0.02569403                       | 166.1753, 242.5368, 250.6331,         |
|        | H           | -1.95417806 | -1.41478433 | -0.00573122                      | 335.3495, 352.9169, 395.4903,         |
|        | C           | -0.43074093 | 1.06973834  | 0.15936799                       | 495.8595, 726.4335, 741.1564,         |
|        | H           | -0.12118798 | 2.02022704  | -0.28280415                      | 748.3565, 782.7995, 843.9485,         |
|        | H           | -0.41661891 | 1.21431984  | 1.24400771                       | 902.7011, 930.8447, 954.4558,         |
|        | C           | -1.86076156 | 0.76141604  | -0.29069554                      | 981.8664, 1032.2029, 1050.1986,       |
|        | H           | -1.88368641 | 0.66132847  | -1.37799333                      | 1077.1639, 1091.8980, 1102.1777,      |
|        | H           | -2.50598194 | 1.60502646  | -0.04091705                      | 1147.6842, 1189.3650, 1226.2967,      |
|        | C           | 0.58236872  | -0.00505728 | -0.21689305                      | 1245.8820, 1265.4396, 1294.7804,      |
|        | H           | 0.51153968  | -0.20781656 | -1.29062199                      | 1300.5526, 1329.4848, 1333.8270,      |
|        | H           | 0.33676490  | -0.94240872 | 0.28956115                       | 1342.0675, 1350.6468, 1380.1752,      |
|        | C           | 2.01340016  | 0.38394200  | 0.13046446                       | 1396.7057, 1411.0307, 1415.6637,      |
|        | H           | 2.07951918  | 0.60222134  | 1.20116412                       | 1457.2451, 1484.8939, 1487.1075,      |
|        | H           | 2.27209739  | 1.31342744  | -0.38642817                      | 1494.4741, 1496.6722, 1503.8847,      |
|        | C           | 3.03311196  | -0.68987527 | -0.22702992                      | 1505.3267, 1514.5156, 1524.8499,      |
| H      | 2.77492447  | -1.61624861 | 0.29254426  | 3030.0416, 3034.1125, 3043.1226, |                                       |
| H      | 2.96306287  | -0.90823094 | -1.29574586 | 3049.8409, 3055.8179, 3057.4344, |                                       |
| C      | 4.45858203  | -0.28361800 | 0.12304631  | 3059.0654, 3070.1596, 3082.5770, |                                       |
| H      | 4.55375603  | -0.08677292 | 1.19185996  | 3085.0747, 3094.0583, 3101.7361, |                                       |
| H      | 4.74288095  | 0.62684663  | -0.40645632 | 3123.4708, 3132.0688, 3152.7785, |                                       |
| H      | 5.17511976  | -1.06111711 | -0.13937942 |                                  |                                       |

|        |             |             |             |             |                                                                                                                                                                                                                                                                                                                                                                                                                                                                                                                                                                                                                                                                                                                                                            |
|--------|-------------|-------------|-------------|-------------|------------------------------------------------------------------------------------------------------------------------------------------------------------------------------------------------------------------------------------------------------------------------------------------------------------------------------------------------------------------------------------------------------------------------------------------------------------------------------------------------------------------------------------------------------------------------------------------------------------------------------------------------------------------------------------------------------------------------------------------------------------|
|        | O           | -4.95472854 | -0.57135472 | -0.16818244 | 3790.9977                                                                                                                                                                                                                                                                                                                                                                                                                                                                                                                                                                                                                                                                                                                                                  |
|        | H           | -5.20018433 | -0.62877933 | 0.76850548  |                                                                                                                                                                                                                                                                                                                                                                                                                                                                                                                                                                                                                                                                                                                                                            |
| SP1_27 | C           | -2.43334255 | -0.33620620 | 0.55425857  | 680.1257i, 34.5346, 44.3957, 56.7366, 72.8022, 95.2999, 116.7779, 137.6581, 157.0445, 248.8699, 257.6526, 320.6723, 362.6087, 395.4118, 496.3780, 725.0297, 734.6732, 758.0786, 808.4725, 844.8989, 890.8785, 920.5509, 940.2045, 995.8357, 1022.7722, 1051.4333, 1080.0292, 1095.5701, 1102.0094, 1147.9821, 1176.2689, 1227.2830, 1256.0247, 1265.9501, 1292.6426, 1306.7968, 1328.1744, 1333.2744, 1344.3186, 1348.3350, 1377.4723, 1395.2012, 1409.2414, 1414.1274, 1456.5549, 1484.5106, 1487.2518, 1494.3218, 1496.5673, 1503.6726, 1505.2344, 1514.5126, 1521.3605, 3029.3289, 3033.6125, 3043.1470, 3049.1038, 3055.5440, 3057.5830, 3058.5664, 3069.7039, 3082.6747, 3085.3069, 3094.3590, 3102.0605, 3123.7731, 3132.0121, 3152.3507, 3788.8118  |
|        | H           | -2.38648653 | -0.15119566 | 1.62794161  |                                                                                                                                                                                                                                                                                                                                                                                                                                                                                                                                                                                                                                                                                                                                                            |
|        | H           | -3.56668909 | -0.43066573 | 0.32184137  |                                                                                                                                                                                                                                                                                                                                                                                                                                                                                                                                                                                                                                                                                                                                                            |
|        | H           | -1.98890048 | -1.30328178 | 0.32554501  |                                                                                                                                                                                                                                                                                                                                                                                                                                                                                                                                                                                                                                                                                                                                                            |
|        | C           | -0.42082148 | 1.13664360  | 0.08115377  |                                                                                                                                                                                                                                                                                                                                                                                                                                                                                                                                                                                                                                                                                                                                                            |
|        | H           | -0.10923352 | 2.00633771  | -0.50305428 |                                                                                                                                                                                                                                                                                                                                                                                                                                                                                                                                                                                                                                                                                                                                                            |
|        | H           | -0.36310997 | 1.43399828  | 1.13256565  |                                                                                                                                                                                                                                                                                                                                                                                                                                                                                                                                                                                                                                                                                                                                                            |
|        | C           | -1.87264141 | 0.80350977  | -0.27051732 |                                                                                                                                                                                                                                                                                                                                                                                                                                                                                                                                                                                                                                                                                                                                                            |
|        | H           | -1.93921876 | 0.55192102  | -1.33142827 |                                                                                                                                                                                                                                                                                                                                                                                                                                                                                                                                                                                                                                                                                                                                                            |
|        | H           | -2.49055150 | 1.68993926  | -0.12075714 |                                                                                                                                                                                                                                                                                                                                                                                                                                                                                                                                                                                                                                                                                                                                                            |
|        | C           | 0.55614773  | -0.00569417 | -0.17138425 |                                                                                                                                                                                                                                                                                                                                                                                                                                                                                                                                                                                                                                                                                                                                                            |
|        | H           | 0.44057592  | -0.35905024 | -1.20149656 |                                                                                                                                                                                                                                                                                                                                                                                                                                                                                                                                                                                                                                                                                                                                                            |
|        | H           | 0.31301408  | -0.85399071 | 0.47418982  |                                                                                                                                                                                                                                                                                                                                                                                                                                                                                                                                                                                                                                                                                                                                                            |
|        | C           | 2.00672345  | 0.39422787  | 0.06508649  |                                                                                                                                                                                                                                                                                                                                                                                                                                                                                                                                                                                                                                                                                                                                                            |
|        | H           | 2.11746409  | 0.76449871  | 1.08926279  |                                                                                                                                                                                                                                                                                                                                                                                                                                                                                                                                                                                                                                                                                                                                                            |
|        | H           | 2.26327125  | 1.23178877  | -0.59115929 |                                                                                                                                                                                                                                                                                                                                                                                                                                                                                                                                                                                                                                                                                                                                                            |
|        | C           | 2.99124159  | -0.74505469 | -0.16607231 |                                                                                                                                                                                                                                                                                                                                                                                                                                                                                                                                                                                                                                                                                                                                                            |
| H      | 2.73627064  | -1.57832523 | 0.49382254  |             |                                                                                                                                                                                                                                                                                                                                                                                                                                                                                                                                                                                                                                                                                                                                                            |
| H      | 2.87559623  | -1.11640317 | -1.18763259 |             |                                                                                                                                                                                                                                                                                                                                                                                                                                                                                                                                                                                                                                                                                                                                                            |
| C      | 4.43672266  | -0.32668149 | 0.06883292  |             |                                                                                                                                                                                                                                                                                                                                                                                                                                                                                                                                                                                                                                                                                                                                                            |
| H      | 4.57660490  | 0.02488436  | 1.09204551  |             |                                                                                                                                                                                                                                                                                                                                                                                                                                                                                                                                                                                                                                                                                                                                                            |
| H      | 4.71797724  | 0.48725163  | -0.60086166 |             |                                                                                                                                                                                                                                                                                                                                                                                                                                                                                                                                                                                                                                                                                                                                                            |
| H      | 5.12744212  | -1.15224242 | -0.09898789 |             |                                                                                                                                                                                                                                                                                                                                                                                                                                                                                                                                                                                                                                                                                                                                                            |
| O      | -4.89637473 | -0.65393689 | -0.16943288 |             |                                                                                                                                                                                                                                                                                                                                                                                                                                                                                                                                                                                                                                                                                                                                                            |
| H      | -4.73720883 | -1.53843778 | -0.53452081 |             |                                                                                                                                                                                                                                                                                                                                                                                                                                                                                                                                                                                                                                                                                                                                                            |
| SP1_28 | C           | 2.84889829  | -0.51234157 | 0.28095469  | 669.3379i, 32.8728, 48.6815, 67.5228, 85.4454, 101.5864, 112.5456, 127.6190, 209.0293, 244.2264, 267.7398, 288.2002, 337.4025, 407.4263, 509.1576, 725.3290, 729.1731, 751.3386, 791.5148, 850.6178, 892.1821, 916.9232, 960.4879, 986.2747, 1041.8476, 1057.7959, 1065.2000, 1081.8729, 1105.9949, 1141.8195, 1192.7486, 1236.9855, 1244.8949, 1271.7168, 1292.9723, 1300.9419, 1327.8952, 1331.1175, 1337.4919, 1355.9552, 1376.1785, 1394.8287, 1409.3838, 1413.1588, 1456.1852, 1482.9307, 1486.7389, 1490.2409, 1501.5098, 1503.3998, 1504.9012, 1512.7692, 1521.6104, 3029.9145, 3037.8934, 3039.8588, 3048.6599, 3057.4178, 3059.9838, 3063.1899, 3073.5285, 3077.8852, 3082.6159, 3094.6583, 3106.8463, 3123.4144, 3132.6803, 3147.2188, 3791.6110 |
|        | H           | 3.29420568  | -1.39167737 | -0.18391489 |                                                                                                                                                                                                                                                                                                                                                                                                                                                                                                                                                                                                                                                                                                                                                            |
|        | H           | 3.51779555  | 0.37502167  | -0.05578297 |                                                                                                                                                                                                                                                                                                                                                                                                                                                                                                                                                                                                                                                                                                                                                            |
|        | H           | 2.93986075  | -0.58204809 | 1.36480549  |                                                                                                                                                                                                                                                                                                                                                                                                                                                                                                                                                                                                                                                                                                                                                            |
|        | C           | 0.48535216  | -1.37940092 | 0.23165755  |                                                                                                                                                                                                                                                                                                                                                                                                                                                                                                                                                                                                                                                                                                                                                            |
|        | H           | 0.90126340  | -2.32781776 | -0.11763909 |                                                                                                                                                                                                                                                                                                                                                                                                                                                                                                                                                                                                                                                                                                                                                            |
|        | H           | 0.44930135  | -1.44087488 | 1.32364274  |                                                                                                                                                                                                                                                                                                                                                                                                                                                                                                                                                                                                                                                                                                                                                            |
|        | C           | 1.43038338  | -0.24730549 | -0.17339924 |                                                                                                                                                                                                                                                                                                                                                                                                                                                                                                                                                                                                                                                                                                                                                            |
|        | H           | 1.08620453  | 0.69610331  | 0.25236766  |                                                                                                                                                                                                                                                                                                                                                                                                                                                                                                                                                                                                                                                                                                                                                            |
|        | H           | 1.40677551  | -0.12875605 | -1.25942071 |                                                                                                                                                                                                                                                                                                                                                                                                                                                                                                                                                                                                                                                                                                                                                            |
|        | C           | -0.93138732 | -1.22051049 | -0.31436157 |                                                                                                                                                                                                                                                                                                                                                                                                                                                                                                                                                                                                                                                                                                                                                            |
|        | H           | -1.51939249 | -2.09856707 | -0.03426401 |                                                                                                                                                                                                                                                                                                                                                                                                                                                                                                                                                                                                                                                                                                                                                            |
|        | H           | -0.89729758 | -1.20965317 | -1.40810653 |                                                                                                                                                                                                                                                                                                                                                                                                                                                                                                                                                                                                                                                                                                                                                            |
|        | C           | -1.65220807 | 0.03013205  | 0.17541504  |                                                                                                                                                                                                                                                                                                                                                                                                                                                                                                                                                                                                                                                                                                                                                            |
|        | H           | -1.13842393 | 0.92454089  | -0.18640316 |                                                                                                                                                                                                                                                                                                                                                                                                                                                                                                                                                                                                                                                                                                                                                            |
|        | H           | -1.60677980 | 0.06993906  | 1.26912469  |                                                                                                                                                                                                                                                                                                                                                                                                                                                                                                                                                                                                                                                                                                                                                            |
|        | C           | -3.10835275 | 0.08552767  | -0.27019593 |                                                                                                                                                                                                                                                                                                                                                                                                                                                                                                                                                                                                                                                                                                                                                            |
| H      | -3.15034929 | 0.02613673  | -1.36091764 |             |                                                                                                                                                                                                                                                                                                                                                                                                                                                                                                                                                                                                                                                                                                                                                            |
| H      | -3.63184030 | -0.79751942 | 0.10511477  |             |                                                                                                                                                                                                                                                                                                                                                                                                                                                                                                                                                                                                                                                                                                                                                            |
| C      | -3.81904913 | 1.34615242  | 0.20423289  |             |                                                                                                                                                                                                                                                                                                                                                                                                                                                                                                                                                                                                                                                                                                                                                            |
| H      | -3.32766205 | 2.23831348  | -0.18640405 |             |                                                                                                                                                                                                                                                                                                                                                                                                                                                                                                                                                                                                                                                                                                                                                            |
| H      | -3.80527088 | 1.41188469  | 1.29315587  |             |                                                                                                                                                                                                                                                                                                                                                                                                                                                                                                                                                                                                                                                                                                                                                            |
| H      | -4.85910330 | 1.36800461  | -0.11924959 |             |                                                                                                                                                                                                                                                                                                                                                                                                                                                                                                                                                                                                                                                                                                                                                            |
| O      | 4.28084978  | 1.57080880  | -0.26887240 |             |                                                                                                                                                                                                                                                                                                                                                                                                                                                                                                                                                                                                                                                                                                                                                            |
| H      | 4.57209525  | 1.68697710  | 0.64905009  |             |                                                                                                                                                                                                                                                                                                                                                                                                                                                                                                                                                                                                                                                                                                                                                            |
| SP1_29 | C           | -2.41810532 | -0.49481317 | 0.55342393  | 751.3385i, 38.3298, 49.0664, 63.6819, 70.3330, 96.3304, 117.2968, 137.8313, 160.5261, 246.5953, 256.3023, 337.7923, 362.0234, 385.9025, 490.9377, 702.4159, 729.3368,                                                                                                                                                                                                                                                                                                                                                                                                                                                                                                                                                                                      |
|        | H           | -2.36711260 | -0.35707216 | 1.63385289  |                                                                                                                                                                                                                                                                                                                                                                                                                                                                                                                                                                                                                                                                                                                                                            |
|        | H           | -3.55201742 | -0.64348611 | 0.33640779  |                                                                                                                                                                                                                                                                                                                                                                                                                                                                                                                                                                                                                                                                                                                                                            |
|        | H           | -1.95195995 | -1.43656946 | 0.27057511  |                                                                                                                                                                                                                                                                                                                                                                                                                                                                                                                                                                                                                                                                                                                                                            |
|        | C           | -0.45497094 | 1.06429615  | 0.14474173  |                                                                                                                                                                                                                                                                                                                                                                                                                                                                                                                                                                                                                                                                                                                                                            |
|        | H           | -0.17357042 | 1.97093459  | -0.39701984 |                                                                                                                                                                                                                                                                                                                                                                                                                                                                                                                                                                                                                                                                                                                                                            |

|        |   |             |             |             |                                       |
|--------|---|-------------|-------------|-------------|---------------------------------------|
|        | H | -0.40204662 | 1.31123971  | 1.20925418  | 750.6640, 782.0469, 843.8666,         |
|        | C | -1.89756093 | 0.70212539  | -0.21499487 | 904.6940, 934.0297, 951.5215,         |
|        | H | -1.95596762 | 0.50250992  | -1.28883278 | 975.6154, 1025.5957, 1049.4250,       |
|        | H | -2.54021024 | 1.56203471  | -0.01647335 | 1079.6443, 1092.6887, 1102.5645,      |
|        | C | 0.55503783  | -0.03382845 | -0.16699395 | 1146.5838, 1181.3928, 1232.1966,      |
|        | H | 0.44534785  | -0.34020623 | -1.21267694 | 1258.6539, 1289.2117, 1301.5518,      |
|        | H | 0.34069533  | -0.91945935 | 0.43705211  | 1327.1305, 1331.9469, 1335.8632,      |
|        | C | 1.99361114  | 0.39929122  | 0.08375831  | 1350.3145, 1355.6871, 1389.8832,      |
|        | H | 2.09793271  | 0.72210396  | 1.12452987  | 1395.3611, 1410.6492, 1414.6660,      |
|        | H | 2.22087167  | 1.27562154  | -0.53141431 | 1448.4586, 1485.2314, 1487.1884,      |
|        | C | 3.01160730  | -0.69613391 | -0.20672690 | 1489.0414, 1494.7659, 1502.9151,      |
|        | H | 2.78579285  | -1.56832008 | 0.41210951  | 1504.4729, 1507.8819, 1514.7444,      |
|        | H | 2.90244810  | -1.02026601 | -1.24492780 | 3029.2203, 3034.0080, 3043.4254,      |
|        | C | 4.44451363  | -0.24478005 | 0.04357245  | 3045.0706, 3049.2470, 3056.8857,      |
|        | H | 4.57876114  | 0.05915399  | 1.08266761  | 3057.2176, 3070.0265, 3083.2346,      |
|        | H | 4.69667665  | 0.61016867  | -0.58538752 | 3086.8054, 3088.9512, 3097.3174,      |
|        | H | 5.15965694  | -1.03879429 | -0.16818338 | 3122.9475, 3132.4439, 3158.4550,      |
|        | O | -4.87936767 | -0.59321781 | -0.18500393 | 3787.9761                             |
|        | H | -4.65515324 | -0.12079405 | -1.00218585 |                                       |
|        | C | -2.88239360 | -0.66185209 | 0.20480692  |                                       |
|        | H | -2.95536105 | -0.88313187 | 1.26940233  | 670.7644i, 30.5487, 40.6581, 55.9382, |
|        | H | -3.79509707 | 0.00421008  | -0.06352269 | 66.9147, 94.8085, 128.9915, 137.8193, |
|        | H | -3.02390155 | -1.57533185 | -0.37240243 | 148.0747, 233.1325, 283.0238,         |
|        | C | -0.36193944 | -0.73376033 | 0.14485960  | 323.4844, 362.5684, 389.2841,         |
|        | H | -0.34527877 | -0.99342348 | 1.20779980  | 493.0174, 725.9729, 732.6229,         |
|        | H | -0.40676605 | -1.68029317 | -0.40195199 | 756.8929, 784.0869, 844.1892,         |
|        | C | -1.61672750 | 0.08390824  | -0.15626419 | 891.2238, 939.0028, 961.8394,         |
|        | H | -1.63278219 | 0.34338205  | -1.21690717 | 983.7238, 1032.3626, 1052.7747,       |
|        | H | -1.57544531 | 1.02633037  | 0.39413629  | 1068.1455, 1080.9470, 1106.8678,      |
|        | C | 0.92367423  | 0.00021603  | -0.21591188 | 1139.5808, 1197.4074, 1229.6597,      |
|        | H | 0.94945536  | 0.95228860  | 0.31993103  | 1247.0651, 1259.4217, 1295.2610,      |
|        | H | 0.91320063  | 0.24644863  | -1.28274170 | 1304.8523, 1328.1583, 1333.0681,      |
|        | C | 2.17445340  | -0.81143278 | 0.10209048  | 1333.7895, 1359.1496, 1379.8013,      |
|        | H | 2.08387235  | -1.79542935 | -0.36553612 | 1390.2317, 1406.2458, 1415.9093,      |
|        | H | 2.22212483  | -0.98642369 | 1.18165543  | 1456.3726, 1483.0626, 1485.7647,      |
|        | C | 3.47396136  | -0.15553393 | -0.35862846 | 1493.6631, 1498.0292, 1505.0857,      |
|        | H | 4.30432980  | -0.83407165 | -0.15453126 | 1511.8477, 1513.2909, 1519.2098,      |
|        | H | 3.44289680  | -0.02404181 | -1.44347418 | 3031.6283, 3034.4802, 3043.4352,      |
|        | C | 3.74735305  | 1.18768651  | 0.30915658  | 3049.4105, 3058.4010, 3059.0790,      |
|        | H | 3.72551659  | 1.08973545  | 1.39621760  | 3062.4552, 3071.7748, 3084.0822,      |
|        | H | 3.00479948  | 1.93381234  | 0.02783028  | 3085.8485, 3092.4188, 3102.2936,      |
|        | H | 4.72574470  | 1.57566431  | 0.02803738  | 3125.5533, 3135.2068, 3148.0782,      |
|        | O | -4.89741848 | 0.91357501  | -0.18001982 | 3791.8465                             |
|        | H | -5.20824962 | 0.83628509  | 0.73556176  |                                       |
|        | C | 2.87755346  | -0.62337006 | 0.31708500  |                                       |
|        | H | 3.04691114  | -1.46397135 | -0.35550209 | 669.1682i, 36.1487, 37.4524, 54.3166, |
|        | H | 3.78548650  | 0.09074270  | 0.19780571  | 89.8135, 94.9194, 126.4256, 136.9004, |
|        | H | 2.92291237  | -0.96343895 | 1.35145501  | 150.3281, 233.0520, 281.7808,         |
|        | C | 0.36288315  | -0.71905645 | 0.14787037  | 325.0494, 362.7122, 389.6550,         |
|        | H | 0.44494953  | -1.59512533 | -0.50248263 | 492.3847, 724.5146, 733.8127,         |
|        | H | 0.30943343  | -1.10056732 | 1.17202183  | 753.6747, 782.6262, 846.3453,         |
|        | C | 1.61419691  | 0.14372886  | -0.00540597 | 888.4377, 934.9820, 967.6281,         |
|        | H | 1.53554754  | 1.01408137  | 0.64937709  | 983.7243, 1030.4977, 1053.1655,       |
|        | H | 1.66696297  | 0.52641424  | -1.02699891 | 1068.1569, 1081.3528, 1107.3408,      |
|        | C | -0.92023411 | 0.03546172  | -0.17788142 | 1140.2650, 1193.8924, 1236.0046,      |
|        | H | -0.87279093 | 0.40304713  | -1.20821544 | 1244.1006, 1260.4614, 1290.5449,      |
|        | H | -0.98273797 | 0.91907073  | 0.46204397  | 1310.2051, 1326.4968, 1329.3297,      |
|        | C | -2.16811110 | -0.82334081 | -0.00572599 | 1337.0078, 1359.3085, 1379.2477,      |
| SP1_30 |   |             |             |             |                                       |
| SP1_31 |   |             |             |             |                                       |

|        |             |             |             |                                  |                                       |
|--------|-------------|-------------|-------------|----------------------------------|---------------------------------------|
|        | H           | -2.25706286 | -1.11799423 | 1.04477860                       | 1390.1727, 1406.8703, 1415.1538,      |
|        | H           | -2.04030989 | -1.74801080 | -0.57482806                      | 1455.5979, 1483.2397, 1485.0672,      |
|        | C           | -3.45922049 | -0.13822500 | -0.44681020                      | 1492.8038, 1497.7321, 1504.9286,      |
|        | H           | -3.38531311 | 0.11426749  | -1.50793928                      | 1511.3474, 1512.6230, 1519.8021,      |
|        | H           | -4.28455742 | -0.84683206 | -0.35579318                      | 3031.5868, 3034.1900, 3043.0690,      |
|        | C           | -3.78523613 | 1.11794257  | 0.35364325                       | 3048.7917, 3058.2739, 3058.8424,      |
|        | H           | -3.04453197 | 1.90036071  | 0.19112260                       | 3062.6187, 3071.3219, 3083.2742,      |
|        | H           | -3.80866370 | 0.89894113  | 1.42285718                       | 3085.6276, 3092.2158, 3102.1731,      |
|        | H           | -4.75730699 | 1.52240964  | 0.07385133                       | 3125.4336, 3135.7272, 3147.4455,      |
|        | O           | 4.90908422  | 0.90259279  | -0.16908331                      | 3789.8860                             |
|        | H           | 5.31740746  | 0.26701755  | -0.77753750                      |                                       |
| SP1_32 | C           | 2.64576043  | -0.72498495 | 0.40771287                       | 670.9077i, 27.7094, 45.7828, 69.2574, |
|        | H           | 2.50317131  | -1.65412063 | -0.14364295                      | 81.7232, 109.1928, 122.3721,          |
|        | H           | 3.72480510  | -0.36109823 | 0.17991621                       | 124.8562, 204.4389, 243.5459,         |
|        | H           | 2.63937350  | -0.92670487 | 1.47868222                       | 271.6798, 303.8742, 323.7689,         |
|        | C           | 0.22412380  | -0.02777469 | 0.28781481                       | 396.6896, 515.5898, 725.4890,         |
|        | H           | -0.00243240 | -0.96568189 | -0.22513163                      | 728.7972, 751.5449, 793.3581,         |
|        | H           | 0.10782256  | -0.22398141 | 1.35858642                       | 851.1383, 870.7587, 929.4478,         |
|        | C           | 1.67356759  | 0.35903164  | -0.00223117                      | 963.6697, 990.9752, 1032.2535,        |
|        | H           | 1.91293079  | 1.28556206  | 0.52372187                       | 1055.1959, 1065.4472, 1075.1351,      |
|        | H           | 1.78475778  | 0.56898075  | -1.06837449                      | 1108.5885, 1141.9239, 1190.0259,      |
|        | C           | -0.76301337 | 1.05371508  | -0.13871998                      | 1238.1361, 1248.2264, 1268.9469,      |
|        | H           | -0.70292733 | 1.18384351  | -1.22367742                      | 1286.4979, 1309.0512, 1327.0052,      |
|        | H           | -0.45360289 | 2.00469962  | 0.30235304                       | 1328.6539, 1341.1092, 1344.1355,      |
|        | C           | -2.20868003 | 0.76500207  | 0.25588802                       | 1377.3336, 1401.0649, 1404.7928,      |
|        | H           | -2.83254678 | 1.61737135  | -0.02623428                      | 1412.9386, 1455.4531, 1482.7651,      |
|        | H           | -2.27741346 | 0.68246942  | 1.34527526                       | 1486.6478, 1492.3741, 1497.4772,      |
|        | C           | -2.78917811 | -0.49574427 | -0.37600823                      | 1503.5221, 1508.5367, 1512.4108,      |
|        | H           | -2.64480915 | -0.45184441 | -1.45936062                      | 1518.9661, 3033.5909, 3034.4483,      |
| H      | -2.23946204 | -1.37174675 | -0.02650667 | 3042.5774, 3049.3168, 3057.3876, |                                       |
| C      | -4.26891816 | -0.66987150 | -0.05891552 | 3058.9809, 3066.2531, 3068.9433, |                                       |
| H      | -4.84815926 | 0.17488781  | -0.43422691 | 3082.6673, 3085.3645, 3093.6787, |                                       |
| H      | -4.42867734 | -0.72615930 | 1.01890953  | 3103.1779, 3124.3639, 3132.2436, |                                       |
| H      | -4.67265079 | -1.57821116 | -0.50474435 | 3146.7348, 3792.8367             |                                       |
| O      | 5.02274230  | -0.00226480 | -0.31227735 |                                  |                                       |
| H      | 5.16590912  | -0.79638769 | -0.85057120 |                                  |                                       |
| SP1_33 | C           | -2.46706693 | 0.45666404  | 0.64530770                       | 666.4499i, 32.5120, 46.9208, 67.4085, |
|        | H           | -2.25222528 | 1.51283960  | 0.80626305                       | 83.9929, 94.8723, 133.7138, 150.7649, |
|        | H           | -3.50114532 | 0.43919358  | 0.11713534                       | 199.7560, 279.6771, 294.6020,         |
|        | H           | -2.59439794 | -0.04464038 | 1.60456418                       | 317.6842, 381.0321, 394.6719,         |
|        | C           | -0.05790702 | -0.23701701 | 0.36472995                       | 505.6037, 719.9989, 730.8236,         |
|        | H           | 0.24376349  | 0.79338061  | 0.57242685                       | 752.9875, 801.5041, 851.2151,         |
|        | H           | -0.08554921 | -0.75038065 | 1.33145465                       | 866.6651, 937.3661, 965.4377,         |
|        | C           | -1.45756987 | -0.23014559 | -0.24785750                      | 970.5055, 1033.4845, 1042.6569,       |
|        | H           | -1.77458257 | -1.25751537 | -0.43924797                      | 1058.6260, 1077.4460, 1117.5081,      |
|        | H           | -1.42361579 | 0.27073476  | -1.21782707                      | 1141.8317, 1174.4429, 1233.5433,      |
|        | C           | 0.97026162  | -0.90887789 | -0.53832668                      | 1244.3867, 1260.6841, 1291.5657,      |
|        | H           | 1.04941902  | -0.34449017 | -1.47125851                      | 1303.0313, 1325.9724, 1329.4002,      |
|        | H           | 0.60380628  | -1.90035722 | -0.81589115                      | 1341.3839, 1368.1108, 1382.9137,      |
|        | C           | 2.35005285  | -1.05426151 | 0.10201520                       | 1389.9984, 1404.6533, 1415.0635,      |
|        | H           | 3.02509558  | -1.52284053 | -0.61903925                      | 1455.3720, 1480.3671, 1488.1260,      |
|        | H           | 2.27658728  | -1.74064536 | 0.94963314                       | 1495.0558, 1498.4883, 1505.1078,      |
|        | C           | 2.97188321  | 0.25863850  | 0.57811892                       | 1507.5051, 1517.9718, 1519.3458,      |
|        | H           | 2.38684541  | 0.66535651  | 1.40588823                       | 3033.7049, 3042.5475, 3049.2848,      |
| H      | 3.96263478  | 0.04692438  | 0.98418988  | 3056.8282, 3058.7047, 3059.3253, |                                       |
| C      | 3.08989640  | 1.30355922  | -0.52528903 | 3066.7097, 3077.8759, 3083.7099, |                                       |
| H      | 2.10916218  | 1.63097527  | -0.87217774 | 3088.0128, 3094.0345, 3102.1512, |                                       |
| H      | 3.62597241  | 0.89931716  | -1.38603525 |                                  |                                       |



|        |             |             |             |                                  |                                       |
|--------|-------------|-------------|-------------|----------------------------------|---------------------------------------|
|        | H           | 3.62772851  | 2.18528454  | -0.17902861                      | 3123.3617, 3132.9672, 3147.7870,      |
|        | O           | -4.80958894 | 0.22028217  | -0.42638418                      | 3790.2804                             |
|        | H           | -5.20008888 | -0.17675266 | 0.36783229                       |                                       |
| SP1_34 | C           | -2.48157049 | 0.21271237  | 0.76081506                       | 667.3146i, 30.1074, 39.7518, 64.0907, |
|        | H           | -2.30236896 | 1.25773654  | 1.01270035                       | 74.4433, 94.0435, 130.3579, 152.2377, |
|        | H           | -3.53158003 | 0.16102110  | 0.26729628                       | 197.0048, 279.1964, 289.5661,         |
|        | H           | -2.57281762 | -0.37634348 | 1.67317320                       | 317.5465, 380.1133, 393.6148,         |
|        | C           | -0.05028731 | -0.33736705 | 0.37170801                       | 505.1323, 720.2189, 728.3036,         |
|        | H           | 0.20937666  | 0.68351912  | 0.66580494                       | 756.1527, 805.9910, 850.4105,         |
|        | H           | -0.03143398 | -0.93593629 | 1.28821271                       | 857.9416, 935.4207, 960.4869,         |
|        | C           | -1.46302352 | -0.34252646 | -0.21006453                      | 974.1890, 1031.3562, 1038.4329,       |
|        | H           | -1.73647218 | -1.36282428 | -0.48669824                      | 1060.6682, 1076.3757, 1117.2227,      |
|        | H           | -1.47583302 | 0.24359026  | -1.13178657                      | 1142.7015, 1171.5485, 1233.2340,      |
|        | C           | 0.98541114  | -0.87620965 | -0.60861417                      | 1248.0443, 1262.0715, 1289.1018,      |
|        | H           | 1.01711416  | -0.22699355 | -1.48768015                      | 1302.3547, 1328.4770, 1332.4459,      |
|        | H           | 0.65731139  | -1.85470062 | -0.96804038                      | 1338.8141, 1368.1665, 1383.8672,      |
|        | C           | 2.38497245  | -1.01407062 | -0.01105737                      | 1388.2561, 1406.0029, 1414.2168,      |
|        | H           | 3.06317802  | -1.38369718 | -0.78472286                      | 1455.6179, 1480.0028, 1487.8648,      |
|        | H           | 2.36201711  | -1.77669154 | 0.77174442                       | 1495.0263, 1497.6200, 1504.8611,      |
|        | C           | 2.95855247  | 0.27805238  | 0.57061838                       | 1506.3563, 1517.3751, 1519.1457,      |
|        | H           | 2.37578044  | 0.58089378  | 1.44328612                       | 3033.6090, 3042.5296, 3049.4381,      |
| H      | 3.96705866  | 0.07703133  | 0.93637760  | 3056.3905, 3058.5796, 3059.0704, |                                       |
| C      | 3.00393457  | 1.42274546  | -0.43491881 | 3065.5780, 3077.9739, 3083.7842, |                                       |
| H      | 2.00163335  | 1.73410259  | -0.73142814 | 3087.8749, 3094.2680, 3101.3244, |                                       |
| H      | 3.53689449  | 1.12323411  | -1.33931547 | 3122.8293, 3131.9442, 3147.7720, |                                       |
| H      | 3.51005805  | 2.29365513  | -0.02017610 | 3791.7785                        |                                       |
| O      | -4.77518576 | 0.30531649  | -0.43103924 |                                  |                                       |
| H      | -4.87636633 | 1.25985253  | -0.29135315 |                                  |                                       |
| SP1_35 | C           | -2.86813855 | -0.58520714 | 0.45815674                       | 772.7151i, 40.8662, 66.8248, 76.9724, |
|        | H           | -2.65729983 | -0.67190943 | 1.52471621                       | 90.8948, 121.8636, 137.3113,          |
|        | H           | -2.89500861 | 0.55970017  | 0.24329303                       | 173.6871, 246.0193, 256.9304,         |
|        | H           | -3.89013101 | -0.89504041 | 0.24915794                       | 285.2850, 298.8338, 331.8329,         |
|        | C           | -0.40079770 | -1.11617860 | 0.05143737                       | 422.9473, 533.9969, 662.2926,         |
|        | H           | -0.29436451 | -1.53794138 | 1.05611883                       | 734.4024, 771.3755, 816.6206,         |
|        | H           | 0.24592422  | -1.70382933 | -0.60198368                      | 863.6347, 874.5414, 908.6134,         |
|        | C           | -1.84554575 | -1.28785789 | -0.41223281                      | 949.3599, 975.5369, 1032.1527,        |
|        | H           | -2.08194434 | -2.35521122 | -0.43129749                      | 1046.6536, 1072.3341, 1090.2289,      |
|        | H           | -1.94639758 | -0.93929862 | -1.44395901                      | 1119.1182, 1136.7792, 1165.8136,      |
|        | C           | 0.07517791  | 0.33263440  | 0.07620662                       | 1217.9389, 1254.1157, 1267.0723,      |
|        | H           | -0.56480617 | 0.90877458  | 0.74883215                       | 1288.9529, 1314.5061, 1325.7428,      |
|        | H           | -0.04014627 | 0.76251501  | -0.92711972                      | 1335.3809, 1344.4028, 1350.8967,      |
|        | C           | 1.52621281  | 0.50033576  | 0.52200210                       | 1392.7614, 1403.8351, 1408.9942,      |
|        | H           | 1.64638739  | 0.07100937  | 1.52167092                       | 1414.1059, 1435.0779, 1480.2749,      |
|        | H           | 1.74760543  | 1.56634779  | 0.61951082                       | 1486.5846, 1491.6048, 1497.9366,      |
|        | C           | 2.55165067  | -0.12522435 | -0.41773252                      | 1504.1985, 1506.2969, 1510.9522,      |
|        | H           | 2.41170074  | -1.20687009 | -0.45658663                      | 1513.8325, 3007.6942, 3036.4534,      |
| H      | 2.38006631  | 0.24589822  | -1.43218177 | 3040.6677, 3043.3873, 3050.4961, |                                       |
| C      | 3.98182074  | 0.18151610  | 0.00811555  | 3057.2394, 3070.7881, 3073.6821, |                                       |
| H      | 4.17387830  | -0.19329584 | 1.01454483  | 3076.7624, 3087.9517, 3093.9745, |                                       |
| H      | 4.16184243  | 1.25734355  | 0.01695626  | 3104.4230, 3124.8642, 3132.4838, |                                       |
| H      | 4.70814599  | -0.27504088 | -0.66318662 | 3155.3521, 3786.0710             |                                       |
| O      | -2.90307175 | 1.89298236  | -0.26582899 |                                  |                                       |
| H      | -2.00315925 | 1.86287985  | -0.62757245 |                                  |                                       |
| SP1_36 | C           | -2.06382448 | -0.01805602 | 0.62556054                       | 671.7618i, 32.0017, 56.2164, 71.0595, |
|        | H           | -1.31854055 | 0.62921615  | 1.08665379                       | 82.5392, 112.2101, 134.7548,          |
|        | H           | -2.94957285 | 0.66566685  | 0.31711202                       | 151.4252, 214.4722, 252.4851,         |
|        | H           | -2.47814965 | -0.69540087 | 1.37290617                       | 264.0931, 342.2415, 379.7048,         |
|        | C           | -0.50112921 | -1.78799016 | -0.30034589                      |                                       |

|        |   |             |             |             |                                       |
|--------|---|-------------|-------------|-------------|---------------------------------------|
|        | H | -0.96055898 | -2.58611106 | 0.28792274  | 403.3426, 502.9080, 716.5389,         |
|        | H | -0.17614478 | -2.24079257 | -1.24056372 | 726.7309, 750.6029, 818.9581,         |
|        | C | -1.56451552 | -0.72967748 | -0.61398789 | 854.4858, 866.0723, 918.0111,         |
|        | H | -2.40453435 | -1.21237139 | -1.11509837 | 948.8461, 978.3707, 1034.3451,        |
|        | H | -1.16557370 | 0.00219201  | -1.31812821 | 1042.5239, 1072.1377, 1088.7213,      |
|        | C | 0.72127878  | -1.25732119 | 0.44649443  | 1114.1115, 1146.9167, 1164.5536,      |
|        | H | 1.42791662  | -2.07869115 | 0.58999391  | 1222.7195, 1249.9254, 1263.1624,      |
|        | H | 0.43214506  | -0.93105664 | 1.44960263  | 1294.2152, 1299.9085, 1326.1851,      |
|        | C | 1.43236106  | -0.11278495 | -0.26536293 | 1333.3731, 1336.2904, 1366.6643,      |
|        | H | 0.77229116  | 0.75786317  | -0.32534119 | 1383.6703, 1388.0780, 1409.5670,      |
|        | H | 1.64603185  | -0.40417113 | -1.29930475 | 1415.1093, 1453.6010, 1483.4715,      |
|        | C | 2.72853266  | 0.29847647  | 0.42193644  | 1489.3810, 1494.3087, 1498.4975,      |
|        | H | 2.51265344  | 0.56969893  | 1.45883231  | 1504.3414, 1504.9258, 1514.3319,      |
|        | H | 3.39966873  | -0.56306279 | 0.46467412  | 1523.3150, 3029.0502, 3043.6971,      |
|        | C | 3.42307590  | 1.45794522  | -0.27984600 | 3046.0089, 3050.3345, 3056.5825,      |
|        | H | 2.77881780  | 2.33798397  | -0.30534578 | 3057.1834, 3067.9699, 3076.1774,      |
|        | H | 3.66546518  | 1.19700069  | -1.31099811 | 3081.6703, 3086.4926, 3094.0051,      |
|        | H | 4.34938212  | 1.73571552  | 0.22177700  | 3106.2806, 3122.6526, 3131.4529,      |
|        | O | -3.89097401 | 1.66172754  | -0.10733125 | 3146.3628, 3790.6522                  |
|        | H | -3.45818015 | 2.41894873  | 0.31726325  |                                       |
|        | C | 2.71592981  | -0.67265973 | -0.23532451 |                                       |
|        | H | 2.65673331  | -0.84180604 | -1.31115466 | 779.5986i, 42.9265, 62.5085, 90.2242, |
|        | H | 2.75586005  | 0.48523741  | -0.10929657 | 111.4560, 136.9931, 159.2771,         |
|        | H | 3.68456998  | -0.99171991 | 0.14420655  | 194.3032, 235.6561, 282.6003,         |
|        | C | 0.19717599  | -1.10072386 | -0.15330919 | 301.1978, 327.8499, 359.9324,         |
|        | H | 0.21717719  | -1.60396940 | -1.12553646 | 443.1846, 521.0573, 660.5895,         |
|        | H | -0.55961635 | -1.61370099 | 0.44383508  | 734.0654, 782.6609, 818.4733,         |
|        | C | 1.55246183  | -1.27228808 | 0.52868099  | 853.2937, 868.6507, 910.0637,         |
|        | H | 1.74201253  | -2.34019587 | 0.66688398  | 956.2650, 965.3790, 1012.5671,        |
|        | H | 1.51733750  | -0.84105382 | 1.53331686  | 1034.7365, 1069.8834, 1096.7333,      |
|        | C | -0.21466704 | 0.35259197  | -0.35914191 | 1122.2209, 1136.0698, 1158.8666,      |
|        | H | 0.53817894  | 0.86098908  | -0.96601222 | 1199.7709, 1251.1017, 1260.6411,      |
|        | H | -0.23314952 | 0.85855841  | 0.61340574  | 1287.9769, 1306.1032, 1331.0664,      |
|        | C | -1.57108828 | 0.51639744  | -1.04552809 | 1336.3660, 1341.5726, 1377.5290,      |
|        | H | -1.49958149 | 0.12325549  | -2.06284395 | 1389.1975, 1393.2424, 1410.1867,      |
|        | H | -1.78792891 | 1.58345233  | -1.14091848 | 1414.7744, 1434.5052, 1479.9527,      |
|        | C | -2.73984696 | -0.16095413 | -0.32973289 | 1484.6842, 1493.8651, 1497.6354,      |
|        | H | -3.65736153 | 0.06809286  | -0.87449256 | 1504.0862, 1505.5373, 1509.5646,      |
|        | H | -2.62569641 | -1.24589431 | -0.37558501 | 1524.1451, 3021.0291, 3039.7507,      |
|        | C | -2.89107210 | 0.27573086  | 1.12276139  | 3041.9051, 3046.4071, 3055.9996,      |
|        | H | -2.94837975 | 1.36339129  | 1.19698359  | 3062.0506, 3072.2195, 3076.2843,      |
|        | H | -2.04590300 | -0.05246993 | 1.72919290  | 3082.6659, 3087.3616, 3095.2209,      |
|        | H | -3.79470429 | -0.13855278 | 1.56796600  | 3098.2575, 3122.5572, 3132.9240,      |
|        | O | 2.74295010  | 1.85316454  | 0.29525880  | 3155.0145, 3786.4853                  |
|        | H | 1.80349152  | 1.87250299  | 0.53754415  |                                       |
| SP1_37 | C | -2.02990354 | 0.58002286  | 0.08748181  |                                       |
|        | H | -1.71753722 | 1.47121799  | -0.45842445 | 683.0539i, 30.1077, 43.8062, 63.3798, |
|        | H | -3.18847988 | 0.58225960  | 0.01505896  | 81.7084, 126.8279, 142.7352,          |
|        | H | -1.78509646 | 0.68774196  | 1.14273081  | 172.6918, 236.4592, 264.1277,         |
|        | C | 0.00889552  | -0.73033039 | -0.65343066 | 294.3659, 324.3071, 357.7265,         |
|        | H | 0.30855415  | -1.65192637 | -1.16062172 | 440.2989, 522.7705, 717.3674,         |
|        | H | 0.32391762  | 0.09415325  | -1.29934679 | 740.1956, 788.1542, 806.0053,         |
|        | C | -1.51633437 | -0.70453750 | -0.52912675 | 845.6041, 853.8968, 912.0802,         |
|        | H | -1.84655257 | -1.55456307 | 0.07217027  | 946.4499, 965.9054, 1015.3650,        |
|        | H | -1.96038623 | -0.82902337 | -1.51770581 | 1035.7149, 1068.6724, 1085.9018,      |
|        | C | 0.73173010  | -0.64153877 | 0.68666385  | 1118.5134, 1144.0936, 1163.6541,      |
|        | H | 0.30539511  | -1.38208210 | 1.36944488  | 1205.2450, 1259.3013, 1262.0015,      |
|        | H | 0.54607927  | 0.33372990  | 1.14239325  | 1294.9289, 1304.3282, 1324.1745,      |
| SP1_38 | C | -2.02990354 | 0.58002286  | 0.08748181  |                                       |
|        | H | -1.71753722 | 1.47121799  | -0.45842445 |                                       |
|        | H | -3.18847988 | 0.58225960  | 0.01505896  |                                       |
|        | H | -1.78509646 | 0.68774196  | 1.14273081  |                                       |
|        | C | 0.00889552  | -0.73033039 | -0.65343066 |                                       |
|        | H | 0.30855415  | -1.65192637 | -1.16062172 |                                       |
|        | H | 0.32391762  | 0.09415325  | -1.29934679 |                                       |
|        | C | -1.51633437 | -0.70453750 | -0.52912675 |                                       |
|        | H | -1.84655257 | -1.55456307 | 0.07217027  |                                       |
|        | H | -1.96038623 | -0.82902337 | -1.51770581 |                                       |
|        | C | 0.73173010  | -0.64153877 | 0.68666385  |                                       |
|        | H | 0.30539511  | -1.38208210 | 1.36944488  |                                       |
|        | H | 0.54607927  | 0.33372990  | 1.14239325  |                                       |

|        |   |             |             |             |                                       |
|--------|---|-------------|-------------|-------------|---------------------------------------|
|        | C | 2.23811546  | -0.87401011 | 0.57945355  | 1341.3210, 1343.7725, 1373.9476,      |
|        | H | 2.41658646  | -1.90350117 | 0.25819077  | 1377.4266, 1388.3712, 1408.6575,      |
|        | H | 2.68310478  | -0.77636786 | 1.57320862  | 1414.1473, 1456.6350, 1480.1836,      |
|        | C | 2.95627904  | 0.07737418  | -0.37807050 | 1492.8396, 1496.1695, 1497.1169,      |
|        | H | 4.02433152  | -0.14601573 | -0.35442104 | 1500.2809, 1506.7282, 1516.7199,      |
|        | H | 2.62989930  | -0.11447265 | -1.40249640 | 1521.5921, 3037.2451, 3042.9986,      |
|        | C | 2.73929746  | 1.54811942  | -0.04097642 | 3049.9794, 3055.5326, 3056.9984,      |
|        | H | 3.00621041  | 1.75146456  | 0.99785983  | 3060.8226, 3071.8672, 3079.7214,      |
|        | H | 1.69699358  | 1.83996315  | -0.17670076 | 3082.8789, 3092.3565, 3096.9199,      |
|        | H | 3.34639262  | 2.19262932  | -0.67549511 | 3102.6588, 3122.0622, 3131.1680,      |
|        | O | -4.61187838 | 0.43070788  | 0.11038832  | 3151.5949, 3792.5291                  |
|        | H | -4.66286348 | 0.42853136  | 1.07907890  |                                       |
|        | C | 2.18018526  | 0.51920379  | 0.27897100  | 680.8901i, 39.9248, 41.9981, 50.4208, |
|        | H | 2.16282936  | 0.59574450  | 1.36659135  | 84.5087, 103.0446, 105.2283,          |
|        | H | 3.28013039  | 0.68920813  | -0.05164145 | 148.5726, 184.1819, 253.5879,         |
|        | H | 1.63073761  | 1.35011183  | -0.16012639 | 285.5368, 313.6129, 347.3882,         |
|        | C | 0.34966803  | -1.24063866 | 0.27062030  | 461.0289, 462.9096, 728.0667,         |
|        | H | 0.13731033  | -2.25899600 | -0.06476323 | 742.3221, 766.1907, 779.1330,         |
|        | H | 0.34531694  | -1.26846453 | 1.36469870  | 835.9229, 892.8198, 928.7169,         |
|        | C | 1.74446124  | -0.84333641 | -0.21877639 | 954.6364, 978.0294, 1013.4833,        |
|        | H | 1.76088790  | -0.85362379 | -1.31074826 | 1035.6718, 1075.0688, 1096.7967,      |
|        | H | 2.46718547  | -1.59100537 | 0.11148846  | 1108.5100, 1141.1174, 1188.9107,      |
|        | C | -0.76284444 | -0.31657966 | -0.21133012 | 1214.2333, 1242.6729, 1267.2951,      |
|        | H | -0.72309192 | -0.24136057 | -1.30368483 | 1292.0915, 1308.0176, 1323.4737,      |
|        | H | -0.59327930 | 0.69054432  | 0.17471386  | 1331.6345, 1346.0683, 1375.5492,      |
|        | C | -2.14600008 | -0.79912095 | 0.21126342  | 1381.4944, 1383.3028, 1410.1345,      |
|        | H | -2.20177952 | -0.80893751 | 1.30461544  | 1414.7122, 1456.6400, 1483.4824,      |
|        | H | -2.27152587 | -1.83579083 | -0.11219403 | 1487.2161, 1492.9753, 1496.9862,      |
|        | C | -3.29418695 | 0.04095117  | -0.34281433 | 1504.3893, 1507.2879, 1512.0984,      |
|        | H | -3.26285991 | 0.01298536  | -1.43525156 | 1523.8536, 3028.4423, 3035.6495,      |
|        | H | -4.24061092 | -0.41765809 | -0.05040988 | 3043.9429, 3049.2945, 3058.5224,      |
|        | C | -3.27201370 | 1.49048812  | 0.12993401  | 3059.2048, 3070.8692, 3077.6891,      |
|        | H | -2.40113727 | 2.02334807  | -0.25073659 | 3083.8137, 3087.6270, 3098.1106,      |
|        | H | -3.24263610 | 1.54050706  | 1.22008284  | 3104.2042, 3125.5051, 3135.6008,      |
|        | H | -4.15816225 | 2.02810771  | -0.20549094 | 3152.5251, 3791.7439                  |
|        | O | 4.69819258  | 0.78290098  | -0.24736847 |                                       |
|        | H | 4.92952826  | 0.97626751  | 0.67459691  |                                       |
| SP1_39 | C | -2.37595555 | -0.61056934 | 0.02580571  | 679.7768i, 28.0831, 43.4433, 52.3147, |
|        | H | -2.43820650 | -1.43797087 | 0.73339191  | 77.9976, 91.6183, 130.7312, 173.0741, |
|        | H | -3.45086658 | -0.17349054 | -0.00695926 | 229.0277, 269.0249, 286.8280,         |
|        | H | -2.16812977 | -0.99186009 | -0.97221696 | 319.5743, 359.1735, 434.8011,         |
|        | C | -0.00760420 | -0.01449132 | 0.73502512  | 517.6319, 719.4621, 731.4989,         |
|        | H | 0.57385332  | 0.81135227  | 1.15090073  | 775.1483, 818.5172, 848.4742,         |
|        | H | -0.03101328 | -0.79418667 | 1.50338500  | 854.2647, 910.7531, 945.7501,         |
|        | C | -1.43140704 | 0.48497897  | 0.47472016  | 967.3179, 1013.6437, 1035.7087,       |
|        | H | -1.40413472 | 1.27484191  | -0.27970145 | 1065.8172, 1086.2628, 1119.8479,      |
|        | H | -1.82311427 | 0.93899370  | 1.38600355  | 1137.6808, 1173.6536, 1203.8381,      |
|        | C | 0.69065677  | -0.55336814 | -0.50857467 | 1258.0700, 1266.4025, 1295.5772,      |
|        | H | 0.72381012  | 0.23362063  | -1.26780514 | 1302.6357, 1327.5784, 1338.6586,      |
|        | H | 0.09975547  | -1.36479690 | -0.93803084 | 1346.0101, 1375.5242, 1378.6128,      |
|        | C | 2.10131238  | -1.07800877 | -0.24055662 | 1389.1045, 1409.9733, 1414.5985,      |
|        | H | 2.53024080  | -1.42674318 | -1.18372695 | 1458.2393, 1480.3800, 1490.9603,      |
|        | H | 2.03536754  | -1.95275943 | 0.41173283  | 1495.5608, 1496.0840, 1500.1859,      |
|        | C | 3.05584608  | -0.06149485 | 0.38638022  | 1506.5503, 1516.4914, 1524.1641,      |
|        | H | 2.73148300  | 0.17513180  | 1.40184234  | 3034.1794, 3042.8841, 3047.9916,      |
|        | H | 4.03906490  | -0.52502456 | 0.48488210  | 3056.1651, 3056.4182, 3061.0609,      |
|        | C | 3.18109939  | 1.22454468  | -0.42211587 | 3076.7968, 3080.6929, 3084.9375,      |
|        | H | 2.24316206  | 1.78095857  | -0.43530167 |                                       |
| SP1_40 | C | -2.37595555 | -0.61056934 | 0.02580571  | 679.7768i, 28.0831, 43.4433, 52.3147, |
|        | H | -2.43820650 | -1.43797087 | 0.73339191  | 77.9976, 91.6183, 130.7312, 173.0741, |
|        | H | -3.45086658 | -0.17349054 | -0.00695926 | 229.0277, 269.0249, 286.8280,         |
|        | H | -2.16812977 | -0.99186009 | -0.97221696 | 319.5743, 359.1735, 434.8011,         |
|        | C | -0.00760420 | -0.01449132 | 0.73502512  | 517.6319, 719.4621, 731.4989,         |
|        | H | 0.57385332  | 0.81135227  | 1.15090073  | 775.1483, 818.5172, 848.4742,         |
|        | H | -0.03101328 | -0.79418667 | 1.50338500  | 854.2647, 910.7531, 945.7501,         |
|        | C | -1.43140704 | 0.48497897  | 0.47472016  | 967.3179, 1013.6437, 1035.7087,       |
|        | H | -1.40413472 | 1.27484191  | -0.27970145 | 1065.8172, 1086.2628, 1119.8479,      |
|        | H | -1.82311427 | 0.93899370  | 1.38600355  | 1137.6808, 1173.6536, 1203.8381,      |
|        | C | 0.69065677  | -0.55336814 | -0.50857467 | 1258.0700, 1266.4025, 1295.5772,      |
|        | H | 0.72381012  | 0.23362063  | -1.26780514 | 1302.6357, 1327.5784, 1338.6586,      |
|        | H | 0.09975547  | -1.36479690 | -0.93803084 | 1346.0101, 1375.5242, 1378.6128,      |
|        | C | 2.10131238  | -1.07800877 | -0.24055662 | 1389.1045, 1409.9733, 1414.5985,      |
|        | H | 2.53024080  | -1.42674318 | -1.18372695 | 1458.2393, 1480.3800, 1490.9603,      |
|        | H | 2.03536754  | -1.95275943 | 0.41173283  | 1495.5608, 1496.0840, 1500.1859,      |
|        | C | 3.05584608  | -0.06149485 | 0.38638022  | 1506.5503, 1516.4914, 1524.1641,      |
|        | H | 2.73148300  | 0.17513180  | 1.40184234  | 3034.1794, 3042.8841, 3047.9916,      |
|        | H | 4.03906490  | -0.52502456 | 0.48488210  | 3056.1651, 3056.4182, 3061.0609,      |
|        | C | 3.18109939  | 1.22454468  | -0.42211587 | 3076.7968, 3080.6929, 3084.9375,      |
|        | H | 2.24316206  | 1.78095857  | -0.43530167 |                                       |

|        |             |             |             |                                  |                                       |
|--------|-------------|-------------|-------------|----------------------------------|---------------------------------------|
|        | H           | 3.44996272  | 1.00681755  | -1.45754690                      | 3094.5695, 3097.0129, 3101.1273,      |
|        | H           | 3.94637351  | 1.87947375  | -0.00742224                      | 3122.4284, 3132.5167, 3153.1642,      |
|        | O           | -4.70476192 | 0.48008589  | -0.25146217                      | 3792.0208                             |
|        | H           | -4.70319991 | 0.37540765  | -1.21583411                      |                                       |
| SP1_41 | C           | 2.04727219  | -0.15166702 | 0.58867885                       | 682.7747i, 30.4705, 36.7462, 42.9987, |
|        | H           | 1.38718477  | -0.98649194 | 0.82220010                       | 79.6192, 82.8986, 123.5578, 192.3575, |
|        | H           | 3.02749640  | -0.65038250 | 0.21588648                       | 231.6357, 243.8163, 293.8163,         |
|        | H           | 2.29524380  | 0.38928120  | 1.50248049                       | 321.1207, 363.3167, 434.4663,         |
|        | C           | 0.30368040  | 1.56594687  | -0.07517291                      | 514.0256, 717.3380, 745.6379,         |
|        | H           | 0.60760258  | 2.27180201  | 0.70195650                       | 749.7650, 796.5992, 855.8776,         |
|        | H           | -0.03299881 | 2.16503087  | -0.92514709                      | 868.5679, 909.4248, 957.2378,         |
|        | C           | 1.52892136  | 0.75342095  | -0.50856929                      | 975.2400, 1003.8951, 1038.7749,       |
|        | H           | 2.31906285  | 1.44246291  | -0.81032644                      | 1069.0942, 1092.2652, 1116.3862,      |
|        | H           | 1.28965639  | 0.15683474  | -1.38988872                      | 1140.8552, 1165.7806, 1212.4206,      |
|        | C           | -0.86811397 | 0.73262355  | 0.44282018                       | 1243.6374, 1262.6648, 1295.3478,      |
|        | H           | -1.68126833 | 1.41289183  | 0.70172948                       | 1297.3268, 1328.9820, 1335.8687,      |
|        | H           | -0.58538110 | 0.22938572  | 1.37257808                       | 1348.7517, 1378.4158, 1379.5985,      |
|        | C           | -1.36813967 | -0.30861061 | -0.55296545                      | 1388.6671, 1409.4392, 1416.2669,      |
|        | H           | -0.55823761 | -1.00288386 | -0.78882542                      | 1456.5974, 1483.0102, 1490.2808,      |
|        | H           | -1.62951398 | 0.19002614  | -1.49261443                      | 1492.7263, 1499.2601, 1504.5199,      |
|        | C           | -2.56937268 | -1.11001374 | -0.05507063                      | 1507.3231, 1513.0344, 1523.1495,      |
|        | H           | -2.78836026 | -1.90037570 | -0.77533005                      | 3031.5073, 3045.5226, 3046.2318,      |
| H      | -2.30144436 | -1.61144436 | 0.87899354  | 3049.2839, 3059.4657, 3068.6423, |                                       |
| C      | -3.82343259 | -0.26924149 | 0.15857127  | 3077.1105, 3081.0732, 3085.6332, |                                       |
| H      | -4.07764961 | 0.28099543  | -0.74924326 | 3086.7619, 3100.5805, 3108.1291, |                                       |
| H      | -3.69214283 | 0.45587913  | 0.96094128  | 3125.8076, 3137.0318, 3145.4920, |                                       |
| H      | -4.67621900 | -0.89509076 | 0.41929955  | 3792.2256                        |                                       |
| O      | 4.34827714  | -1.06480317 | -0.15666979 |                                  |                                       |
| H      | 4.80586181  | -0.70424658 | 0.61891607  |                                  |                                       |
| SP1_42 | C           | -2.07435852 | 0.01260609  | -0.65819809                      | 669.7801i, 30.6686, 33.6794, 63.2008, |
|        | H           | -1.43312818 | -0.83013372 | -0.91440445                      | 85.8704, 113.4960, 124.6590,          |
|        | H           | -3.09508372 | -0.43504239 | -0.33470505                      | 187.2448, 222.3372, 244.4751,         |
|        | H           | -2.29262016 | 0.59662545  | -1.55278408                      | 294.1969, 336.0113, 358.8263,         |
|        | C           | -0.28126033 | 1.63226999  | 0.11185572                       | 434.8434, 514.6833, 715.9009,         |
|        | H           | -0.54302578 | 2.38149432  | -0.63937656                      | 726.1585, 757.3308, 811.0858,         |
|        | H           | 0.06000254  | 2.18133350  | 0.99321934                       | 850.2457, 869.6738, 903.1750,         |
|        | C           | -1.54462791 | 0.84944471  | 0.48687561                       | 958.8849, 963.7681, 1025.9331,        |
|        | H           | -2.31354475 | 1.55558912  | 0.80301652                       | 1036.6578, 1071.2173, 1093.1002,      |
|        | H           | -1.34659002 | 0.20693933  | 1.34602090                       | 1115.9912, 1146.5783, 1155.1414,      |
|        | C           | 0.86892918  | 0.77792667  | -0.41999085                      | 1215.8232, 1247.1027, 1263.9227,      |
|        | H           | 1.71167615  | 1.43720024  | -0.63476447                      | 1293.0042, 1304.4005, 1327.2456,      |
|        | H           | 0.58635919  | 0.32571239  | -1.37563575                      | 1333.5243, 1346.5562, 1376.2170,      |
|        | C           | 1.31085133  | -0.32233527 | 0.53901681                       | 1378.4678, 1388.9379, 1408.6030,      |
|        | H           | 0.47051408  | -0.99322425 | 0.73279542                       | 1416.5338, 1454.1831, 1482.6712,      |
|        | H           | 1.57415613  | 0.12624534  | 1.50299475                       | 1489.8632, 1492.8017, 1498.4874,      |
|        | C           | 2.48912653  | -1.14893648 | 0.02755554                       | 1504.4413, 1507.4892, 1512.3872,      |
|        | H           | 2.66420783  | -1.97723148 | 0.71663042                       | 1523.4780, 3031.9731, 3045.9673,      |
| H      | 2.21958679  | -1.59910257 | -0.93187793 | 3046.4214, 3048.8722, 3059.3339, |                                       |
| C      | 3.77843346  | -0.34986112 | -0.12849217 | 3068.1724, 3076.7063, 3081.9703, |                                       |
| H      | 4.03711672  | 0.15026103  | 0.80660878  | 3086.0637, 3086.7139, 3100.2499, |                                       |
| H      | 3.68958581  | 0.41385886  | -0.90027213 | 3107.4234, 3126.0355, 3136.1489, |                                       |
| H      | 4.61100047  | -0.99693026 | -0.40239888 | 3146.3568, 3791.7587             |                                       |
| O      | -4.24189643 | -1.15184878 | 0.14493258  |                                  |                                       |
| H      | -3.94760414 | -2.03549220 | -0.12626286 |                                  |                                       |
| SP2_1  | C           | -3.37625914 | -1.14795850 | -0.12898840                      | 489.1324i, 47.2193, 50.1656, 72.6715, |
|        | H           | -3.29671618 | -2.18941588 | 0.19094136                       | 102.2640, 108.6920, 118.9088,         |
|        | H           | -4.31758083 | -0.75014480 | 0.24635194                       | 144.5657, 153.7395, 236.7526,         |
|        | H           | -3.41222924 | -1.13615610 | -1.21844020                      |                                       |

|       |   |             |             |             |                                       |
|-------|---|-------------|-------------|-------------|---------------------------------------|
|       | C | -0.84750751 | -0.81262043 | -0.15074733 | 248.6810, 251.1929, 307.0455,         |
|       | H | -0.68974691 | -1.85386075 | 0.15332433  | 419.1425, 487.6389, 627.8588,         |
|       | H | -0.87196643 | -0.81205015 | -1.24426126 | 729.3027, 750.4838, 810.0252,         |
|       | C | -2.19125974 | -0.34995323 | 0.37660755  | 864.8304, 900.7043, 930.9404,         |
|       | H | -2.33838161 | 0.73067172  | 0.02253981  | 940.1904, 1021.7187, 1024.8791,       |
|       | H | -2.18307942 | -0.29557231 | 1.46789756  | 1068.6647, 1087.1438, 1093.8982,      |
|       | C | 0.31723298  | 0.04069773  | 0.33287745  | 1099.2473, 1168.5627, 1201.9200,      |
|       | H | 0.33007582  | 0.04900091  | 1.42769283  | 1238.2995, 1244.6806, 1256.8337,      |
|       | H | 0.15426720  | 1.07429526  | 0.01337311  | 1300.7887, 1313.7171, 1328.9546,      |
|       | C | 1.66724741  | -0.44043195 | -0.18185900 | 1335.2451, 1343.6650, 1365.8160,      |
|       | H | 1.65304955  | -0.45242259 | -1.27612052 | 1399.6924, 1407.5206, 1411.5127,      |
|       | H | 1.82886416  | -1.47621104 | 0.13325619  | 1415.0240, 1479.2837, 1487.6938,      |
|       | C | 2.83220462  | 0.41729586  | 0.29540224  | 1493.1731, 1494.4905, 1499.8411,      |
|       | H | 2.66903393  | 1.45032266  | -0.02212027 | 1503.8122, 1505.1597, 1514.3834,      |
|       | H | 2.84347167  | 0.43005879  | 1.38843677  | 1666.2445, 3024.2443, 3030.2441,      |
|       | C | 4.17514430  | -0.07575977 | -0.22707194 | 3037.1606, 3049.3985, 3053.4734,      |
|       | H | 4.19136320  | -0.07095966 | -1.31784290 | 3056.6164, 3057.7286, 3061.6574,      |
|       | H | 4.36667588  | -1.09836611 | 0.10123014  | 3072.4301, 3082.8006, 3093.4973,      |
|       | H | 4.99711297  | 0.54777529  | 0.12280998  | 3118.8183, 3124.2580, 3131.3076,      |
|       | O | -2.41330274 | 2.19363648  | -0.32648999 | 3141.9261, 3780.9728                  |
|       | H | -2.07860925 | 2.51632470  | 0.52552766  |                                       |
|       | C | -3.04163306 | -0.49414199 | 0.30766752  | 642.8225i, 35.6119, 50.7239, 77.9223, |
|       | H | -3.79650457 | 0.29454126  | 0.33973234  | 118.7504, 131.4301, 184.8517,         |
|       | H | -3.45192142 | -1.33794266 | -0.24429911 | 202.4416, 209.6521, 239.9070,         |
|       | H | -2.85237732 | -0.82032944 | 1.33075229  | 260.1075, 294.8020, 316.8679,         |
|       | C | -1.08909484 | 1.12976052  | 0.44384104  | 432.4026, 516.0888, 661.2373,         |
|       | H | -1.83793657 | 1.90271014  | 0.64501160  | 727.9137, 749.7035, 791.2684,         |
|       | H | -0.78394423 | 0.75297761  | 1.42366732  | 846.7196, 877.2396, 893.9137,         |
|       | C | -1.76653895 | 0.01533919  | -0.33152310 | 947.7910, 972.9846, 1049.8018,        |
|       | H | -1.07094001 | -0.90001432 | -0.40244320 | 1055.6522, 1057.8385, 1071.2247,      |
|       | H | -1.92195978 | 0.30060154  | -1.37544526 | 1114.8692, 1156.8216, 1166.5631,      |
|       | C | 0.09262570  | 1.77371464  | -0.28014548 | 1182.0702, 1249.0700, 1259.0207,      |
|       | H | 0.49091357  | 2.58186201  | 0.33874157  | 1301.0995, 1311.0046, 1329.2394,      |
|       | H | -0.27450182 | 2.23924047  | -1.19822031 | 1342.8319, 1359.6983, 1390.6129,      |
|       | C | 1.22638336  | 0.81307677  | -0.63240853 | 1398.4497, 1407.2863, 1409.7945,      |
|       | H | 1.98929427  | 1.35559539  | -1.19639421 | 1419.0759, 1483.8622, 1491.8573,      |
|       | H | 0.85635002  | 0.03326394  | -1.30493629 | 1492.8270, 1497.6055, 1499.4375,      |
|       | C | 1.88945360  | 0.16965195  | 0.58148425  | 1500.8557, 1504.9214, 1521.6644,      |
|       | H | 2.28265069  | 0.95550051  | 1.23162455  | 1623.6115, 3034.8348, 3040.2151,      |
|       | H | 1.14494647  | -0.36039979 | 1.18287886  | 3047.9597, 3048.3806, 3051.2953,      |
|       | C | 3.01254255  | -0.78387175 | 0.19001909  | 3053.9556, 3062.4480, 3066.5419,      |
|       | H | 3.78969262  | -0.25541717 | -0.36325634 | 3074.3420, 3088.3104, 3092.1562,      |
|       | H | 2.64697368  | -1.58297764 | -0.45969123 | 3113.4557, 3119.2206, 3134.5648,      |
|       | H | 3.47393111  | -1.24594242 | 1.06168748  | 3142.7003, 3779.4803                  |
|       | O | -0.38781948 | -2.22260593 | -0.32874681 |                                       |
|       | H | 0.47545908  | -1.87359801 | -0.05304431 |                                       |
| SP2_2 | C | -3.04190060 | -0.49184919 | 0.30145208  | 642.5716i, 18.1660, 47.6680, 78.8855, |
|       | H | -3.79645664 | 0.29731258  | 0.32847714  | 117.6927, 129.8485, 184.7253,         |
|       | H | -3.44985742 | -1.33625551 | -0.25134151 | 201.1225, 208.7145, 239.6924,         |
|       | H | -2.85780593 | -0.81656225 | 1.32593454  | 259.5284, 294.8174, 316.5225,         |
|       | C | -1.08848716 | 1.13036653  | 0.44541928  | 432.1256, 516.3715, 667.8448,         |
|       | H | -1.83834502 | 1.90245955  | 0.64607820  | 725.2757, 747.4861, 791.4484,         |
|       | H | -0.78436382 | 0.75270896  | 1.42518886  | 846.8642, 877.7783, 893.6155,         |
|       | C | -1.76327952 | 0.01586319  | -0.33208586 | 947.6568, 972.8112, 1048.8868,        |
|       | H | -1.06881717 | -0.90072216 | -0.39557782 | 1055.5009, 1057.5846, 1070.9005,      |
|       | H | -1.91314035 | 0.29946252  | -1.37724461 | 1114.6213, 1156.7682, 1165.9336,      |
|       | C | 0.09372308  | 1.77615509  | -0.27604910 | 1181.4928, 1248.5931, 1258.2739,      |
|       | H | 0.49237346  | 2.58187840  | 0.34572878  |                                       |
| SP2_3 | C | -3.04190060 | -0.49184919 | 0.30145208  | 642.5716i, 18.1660, 47.6680, 78.8855, |
|       | H | -3.79645664 | 0.29731258  | 0.32847714  | 117.6927, 129.8485, 184.7253,         |
|       | H | -3.44985742 | -1.33625551 | -0.25134151 | 201.1225, 208.7145, 239.6924,         |
|       | H | -2.85780593 | -0.81656225 | 1.32593454  | 259.5284, 294.8174, 316.5225,         |
|       | C | -1.08848716 | 1.13036653  | 0.44541928  | 432.1256, 516.3715, 667.8448,         |
|       | H | -1.83834502 | 1.90245955  | 0.64607820  | 725.2757, 747.4861, 791.4484,         |
|       | H | -0.78436382 | 0.75270896  | 1.42518886  | 846.8642, 877.7783, 893.6155,         |
|       | C | -1.76327952 | 0.01586319  | -0.33208586 | 947.6568, 972.8112, 1048.8868,        |
|       | H | -1.06881717 | -0.90072216 | -0.39557782 | 1055.5009, 1057.5846, 1070.9005,      |
|       | H | -1.91314035 | 0.29946252  | -1.37724461 | 1114.6213, 1156.7682, 1165.9336,      |
|       | C | 0.09372308  | 1.77615509  | -0.27604910 | 1181.4928, 1248.5931, 1258.2739,      |
|       | H | 0.49237346  | 2.58187840  | 0.34572878  |                                       |

|       |             |             |             |                                  |                                       |
|-------|-------------|-------------|-------------|----------------------------------|---------------------------------------|
|       | H           | -0.27264766 | 2.24503227  | -1.19272346                      | 1301.4245, 1311.0192, 1329.3114,      |
|       | C           | 1.22720825  | 0.81623141  | -0.63100049                      | 1343.2287, 1358.4443, 1390.5268,      |
|       | H           | 1.99234352  | 1.36120461  | -1.18960494                      | 1398.3151, 1407.2684, 1409.7063,      |
|       | H           | 0.85764361  | 0.04194982  | -1.31046496                      | 1419.2911, 1483.7187, 1491.7433,      |
|       | C           | 1.88539045  | 0.16381711  | 0.58075104                       | 1492.6957, 1497.3871, 1499.1381,      |
|       | H           | 2.27270537  | 0.94520900  | 1.23970989                       | 1500.7563, 1504.9000, 1521.3873,      |
|       | H           | 1.13924771  | -0.37467437 | 1.17212154                       | 1628.3520, 3034.9579, 3040.3828,      |
|       | C           | 3.01404078  | -0.78229320 | 0.18726767                       | 3047.1346, 3048.1054, 3051.6058,      |
|       | H           | 3.79302857  | -0.24655871 | -0.35635463                      | 3054.0195, 3062.6770, 3067.0207,      |
|       | H           | 2.65594420  | -1.57709196 | -0.47201429                      | 3074.4611, 3088.3426, 3091.8954,      |
|       | H           | 3.47118947  | -1.25124315 | 1.05745261                       | 3112.8296, 3119.3798, 3134.8874,      |
|       | O           | -0.39290610 | -2.22707271 | -0.31696450                      | 3142.6786, 3778.5550                  |
|       | H           | 0.49003515  | -1.87727350 | -0.11417708                      |                                       |
| SP2_4 | C           | -3.36171802 | -1.14281161 | -0.14052316                      | 494.8843i, 38.1789, 41.1124, 67.4108, |
|       | H           | -3.28526600 | -2.19718048 | 0.13454320                       | 86.8092, 98.4053, 103.3912, 141.7284, |
|       | H           | -4.30046604 | -0.75733271 | 0.25364194                       | 147.4779, 231.6602, 248.2924,         |
|       | H           | -3.40043655 | -1.08385545 | -1.22835310                      | 250.4655, 307.6908, 418.8859,         |
|       | C           | -0.83152507 | -0.81349887 | -0.15425218                      | 487.8131, 625.5947, 729.0295,         |
|       | H           | -0.66971203 | -1.86390756 | 0.11387846                       | 750.0104, 805.8751, 858.9531,         |
|       | H           | -0.86162589 | -0.77593297 | -1.24699167                      | 900.0253, 929.8836, 939.9712,         |
|       | C           | -2.17336353 | -0.37032574 | 0.39447367                       | 1022.3850, 1025.2568, 1068.9074,      |
|       | H           | -2.31448393 | 0.72173422  | 0.08140531                       | 1087.0511, 1093.7653, 1099.0018,      |
|       | H           | -2.16270761 | -0.35795564 | 1.48704119                       | 1168.9980, 1201.2013, 1227.3463,      |
|       | C           | 0.33255022  | 0.02740350  | 0.35208639                       | 1247.2050, 1257.6110, 1300.5843,      |
|       | H           | 0.35436679  | -0.00544656 | 1.44621811                       | 1313.3609, 1332.0191, 1335.0159,      |
|       | H           | 0.16072510  | 1.07168565  | 0.07411743                       | 1365.0211, 1381.7835, 1399.1335,      |
|       | C           | 1.68096557  | -0.42535295 | -0.19160909                      | 1407.7515, 1411.3117, 1414.7028,      |
|       | H           | 1.65794331  | -0.39514101 | -1.28537100                      | 1478.8091, 1487.4928, 1492.7813,      |
|       | H           | 1.85095146  | -1.47160681 | 0.08176565                       | 1494.4386, 1499.1327, 1503.9267,      |
|       | C           | 2.84497280  | 0.42005262  | 0.30932717                       | 1504.5580, 1514.1717, 1659.3743,      |
|       | H           | 2.67303243  | 1.46375811  | 0.03416203                       | 3024.4973, 3029.9640, 3037.0608,      |
|       | H           | 2.86550413  | 0.39001183  | 1.40188600                       | 3049.1819, 3053.9995, 3055.7503,      |
|       | C           | 4.18624776  | -0.04371645 | -0.24336942                      | 3057.2661, 3061.5675, 3072.4395,      |
| H     | 4.19314942  | 0.00442004  | -1.33319147 | 3082.6532, 3092.9461, 3119.1869, |                                       |
| H     | 4.38646833  | -1.07739103 | 0.04233336  | 3123.8396, 3130.9381, 3141.8954, |                                       |
| H     | 5.00760528  | 0.57042262  | 0.12414867  | 3782.0530                        |                                       |
| O     | -2.50107873 | 2.16377349  | -0.33162483 |                                  |                                       |
| H     | -2.21519666 | 2.54302688  | 0.51496423  |                                  |                                       |
| SP2_5 | C           | -3.35246974 | -1.06295978 | -0.17968517                      | 647.4827i, 42.4935, 52.7274, 77.1557, |
|       | H           | -3.28653736 | -2.14915551 | -0.08984862                      | 100.9798, 107.7924, 115.2903,         |
|       | H           | -4.28234315 | -0.74620282 | 0.29181479                       | 143.6836, 150.5477, 236.4462,         |
|       | H           | -3.40703890 | -0.82711579 | -1.24400671                      | 247.3188, 251.3485, 307.9710,         |
|       | C           | -0.82341921 | -0.75314822 | -0.19656063                      | 420.7401, 487.4772, 624.2957,         |
|       | H           | -0.66811989 | -1.83606960 | -0.12730252                      | 724.6993, 735.5269, 775.9416,         |
|       | H           | -0.87986951 | -0.51675928 | -1.26341953                      | 851.7310, 897.3544, 928.7245,         |
|       | C           | -2.14547779 | -0.40294185 | 0.45558019                       | 945.9537, 1020.3713, 1024.3515,       |
|       | H           | -2.25573043 | 0.73693087  | 0.36766191                       | 1068.6716, 1086.4635, 1095.6731,      |
|       | H           | -2.11403484 | -0.57630507 | 1.53395050                       | 1108.1939, 1163.3482, 1182.7453,      |
|       | C           | 0.36066862  | -0.02321625 | 0.42302205                       | 1230.2099, 1255.4307, 1271.8394,      |
|       | H           | 0.41636463  | -0.26384792 | 1.48925541                       | 1299.1335, 1313.3948, 1334.0454,      |
|       | H           | 0.18489919  | 1.05414730  | 0.35673217                       | 1336.3963, 1365.8991, 1390.1681,      |
|       | C           | 1.68723951  | -0.36562036 | -0.24130280                      | 1405.4192, 1410.2528, 1411.3393,      |
|       | H           | 1.63124954  | -0.12234286 | -1.30699778                      | 1416.0054, 1477.2565, 1487.1062,      |
|       | H           | 1.85681037  | -1.44566252 | -0.18270790                      | 1493.2620, 1497.9696, 1500.2982,      |
|       | C           | 2.87345983  | 0.36293067  | 0.37738630                       | 1503.2157, 1504.5729, 1514.1845,      |
|       | H           | 2.70118270  | 1.44046697  | 0.31805885                       | 1690.0396, 3024.2296, 3030.2463,      |
|       | H           | 2.92795876  | 0.11922014  | 1.44155338                       | 3040.5302, 3050.4445, 3051.1311,      |
|       | C           | 4.19269731  | 0.01372611  | -0.29879209                      |                                       |

|       |             |             |             |                                  |                                       |
|-------|-------------|-------------|-------------|----------------------------------|---------------------------------------|
|       | H           | 4.16568556  | 0.27436525  | -1.35780894                      | 3056.9626, 3057.8423, 3060.4934,      |
|       | H           | 4.39347125  | -1.05628811 | -0.22749464                      | 3075.2559, 3083.2608, 3094.9901,      |
|       | H           | 5.03035210  | 0.54244908  | 0.15472615                       | 3113.2652, 3123.8649, 3130.0312,      |
|       | O           | -2.48483051 | 2.11073534  | -0.18976621                      | 3131.4857, 3782.9510                  |
|       | H           | -3.29184710 | 1.87366518  | -0.67392400                      |                                       |
| SP2_6 | C           | 2.60158698  | -0.59257656 | 0.45002713                       | 543.8716i, 60.4224, 79.3249, 91.3585, |
|       | H           | 2.95145284  | -1.61618634 | 0.29491780                       | 100.6462, 111.0434, 145.1784,         |
|       | H           | 3.47332883  | 0.05964552  | 0.48300335                       | 198.3799, 207.5724, 256.7494,         |
|       | H           | 2.11665535  | -0.54933809 | 1.42469691                       | 326.6177, 341.3815, 387.9558,         |
|       | C           | 0.45444162  | -1.10813059 | -0.85311071                      | 439.6293, 517.2498, 642.1324,         |
|       | H           | -0.18679093 | -0.70205577 | -1.63835283                      | 729.9524, 771.8305, 800.9219,         |
|       | H           | 0.83077888  | -2.06489481 | -1.23051884                      | 834.7977, 873.5330, 887.7254,         |
|       | C           | 1.64903660  | -0.18489281 | -0.65744506                      | 950.9033, 964.7361, 1004.7149,        |
|       | H           | 1.24871650  | 0.86295139  | -0.39877059                      | 1050.7852, 1051.4781, 1073.5867,      |
|       | H           | 2.17840000  | -0.04956367 | -1.60194902                      | 1103.5979, 1157.9968, 1163.7098,      |
|       | C           | -0.36750589 | -1.36365959 | 0.40924716                       | 1180.5625, 1223.0919, 1250.8447,      |
|       | H           | 0.24387666  | -1.89779552 | 1.13973837                       | 1288.7111, 1316.4649, 1338.2623,      |
|       | H           | -1.18798061 | -2.03873586 | 0.15779729                       | 1353.6753, 1362.1195, 1378.7088,      |
|       | C           | -0.92465230 | -0.09497699 | 1.05683353                       | 1395.2725, 1400.7652, 1412.3112,      |
|       | H           | -0.10316791 | 0.51685679  | 1.43636399                       | 1416.1544, 1475.5700, 1487.4977,      |
|       | H           | -1.52340348 | -0.38487047 | 1.92451731                       | 1492.1901, 1497.2082, 1499.2181,      |
|       | C           | -1.78314228 | 0.76152681  | 0.12664298                       | 1506.0752, 1509.5671, 1519.1868,      |
|       | H           | -2.14005539 | 1.62687439  | 0.68752060                       | 1727.3909, 3034.1410, 3047.7361,      |
| H     | -1.16518806 | 1.16685084  | -0.67678712 | 3052.9656, 3053.2749, 3062.4992, |                                       |
| C     | -2.97241205 | 0.00952948  | -0.46024213 | 3068.5341, 3080.0475, 3085.4104, |                                       |
| H     | -3.57326379 | -0.44603290 | 0.32952182  | 3089.1944, 3097.7468, 3102.1931, |                                       |
| H     | -2.65186032 | -0.78861324 | -1.13112850 | 3120.0249, 3121.4206, 3129.4526, |                                       |
| H     | -3.61880970 | 0.67618132  | -1.03010711 | 3140.1462, 3786.1955             |                                       |
| O     | 1.14441679  | 2.31132564  | -0.02756667 |                                  |                                       |
| H     | 2.00786077  | 2.57720291  | -0.38164743 |                                  |                                       |
| SP2_7 | C           | 2.19572720  | -0.33417716 | 1.40095333                       | 563.7606i, 45.7354, 74.6826, 83.4509, |
|       | H           | 2.60678337  | -1.33691465 | 1.54488738                       | 94.8240, 129.2199, 166.9059,          |
|       | H           | 2.82912920  | 0.37163255  | 1.93493769                       | 188.1631, 202.1102, 254.9235,         |
|       | H           | 1.20834695  | -0.31298431 | 1.86223026                       | 266.6606, 288.8804, 374.4604,         |
|       | C           | 1.34323031  | -0.97828593 | -0.93390318                      | 401.8259, 508.3232, 662.1114,         |
|       | H           | 1.25008848  | -0.57022357 | -1.94378490                      | 752.4730, 770.4571, 802.2883,         |
|       | H           | 1.93579455  | -1.89389264 | -1.02765378                      | 846.0073, 857.4193, 920.8335,         |
|       | C           | 2.12996789  | 0.00200747  | -0.07569352                      | 950.5060, 979.5387, 1029.9923,        |
|       | H           | 1.68295686  | 1.05817823  | -0.17259958                      | 1043.2082, 1072.7594, 1095.9137,      |
|       | H           | 3.12922766  | 0.13998648  | -0.49085269                      | 1126.3483, 1160.9858, 1172.7625,      |
|       | C           | -0.04152880 | -1.34663259 | -0.40558045                      | 1206.8937, 1243.2528, 1264.0358,      |
|       | H           | 0.05301840  | -1.86208951 | 0.55389763                       | 1272.4876, 1300.8481, 1322.0579,      |
|       | H           | -0.49678322 | -2.06583915 | -1.09085491                      | 1333.6589, 1359.6093, 1379.6004,      |
|       | C           | -0.98251285 | -0.15956141 | -0.24080185                      | 1385.1068, 1406.6787, 1411.3031,      |
|       | H           | -1.03964200 | 0.38830934  | -1.18997032                      | 1415.6157, 1476.8929, 1488.8344,      |
|       | H           | -0.57874872 | 0.53380027  | 0.50365383                       | 1491.8436, 1493.7197, 1504.4833,      |
|       | C           | -2.38915079 | -0.56657270 | 0.18043691                       | 1505.3976, 1509.2726, 1521.2037,      |
|       | H           | -2.80075493 | -1.25470045 | -0.56204504                      | 1616.7039, 3009.1053, 3035.9836,      |
| H     | -2.33054404 | -1.12529622 | 1.11802925  | 3047.2382, 3049.5765, 3052.5721, |                                       |
| C     | -3.31803518 | 0.62839029  | 0.34937037  | 3056.5434, 3058.8695, 3073.5519, |                                       |
| H     | -3.40939365 | 1.18354752  | -0.58551928 | 3082.8466, 3091.0917, 3094.5919, |                                       |
| H     | -2.93364538 | 1.31445953  | 1.10540898  | 3116.9744, 3122.4339, 3134.1479, |                                       |
| H     | -4.31778740 | 0.32102330  | 0.65351812  | 3143.7667, 3782.4037             |                                       |
| O     | 1.16161977  | 2.43650872  | -0.39328821 |                                  |                                       |
| H     | 0.29280901  | 2.14792567  | -0.71566670 |                                  |                                       |
| SP2_8 | C           | -2.93984693 | -1.44920082 | -0.38938336                      | 493.7002i, 27.5909, 61.5541, 76.7490, |
|       | H           | -2.75985183 | -2.45092168 | 0.00760819                       | 93.3922, 101.3124, 121.1404,          |
|       | H           | -3.99777222 | -1.22282548 | -0.26806370                      |                                       |

|        |   |             |             |             |                                       |
|--------|---|-------------|-------------|-------------|---------------------------------------|
|        | H | -2.71600312 | -1.46862459 | -1.45606823 | 136.7298, 205.2070, 239.3158,         |
|        | C | -0.57652996 | -0.65909450 | 0.15802833  | 242.6844, 271.7612, 312.0579,         |
|        | H | -0.31614798 | -1.63533783 | 0.58495165  | 402.4046, 518.2115, 629.8155,         |
|        | H | -0.34533647 | -0.71600194 | -0.90807926 | 734.2083, 757.6405, 817.8993,         |
|        | C | -2.06690272 | -0.43617772 | 0.32355704  | 860.8005, 875.4117, 925.2079,         |
|        | H | -2.30927950 | 0.59063827  | -0.12707879 | 943.9479, 988.7885, 1032.1031,        |
|        | H | -2.33322471 | -0.35311539 | 1.37993790  | 1058.5123, 1080.6141, 1096.8151,      |
|        | C | 0.26522887  | 0.42567621  | 0.82089623  | 1110.4556, 1164.2011, 1190.1324,      |
|        | H | -0.07639851 | 0.55562053  | 1.85192317  | 1240.9585, 1248.7044, 1270.6597,      |
|        | H | 0.08112419  | 1.37365398  | 0.30650005  | 1295.8772, 1310.1320, 1330.5771,      |
|        | C | 1.76314354  | 0.13418323  | 0.82425546  | 1331.8482, 1344.3528, 1370.3986,      |
|        | H | 1.95266788  | -0.78751909 | 1.38373707  | 1404.7584, 1406.0687, 1409.0315,      |
|        | H | 2.28143142  | 0.93157508  | 1.36351572  | 1413.2849, 1479.1872, 1487.2260,      |
|        | C | 2.37476306  | 0.00646815  | -0.56700421 | 1493.9153, 1497.5374, 1498.9243,      |
|        | H | 1.93890091  | -0.85011839 | -1.08475286 | 1501.0575, 1503.4893, 1512.5950,      |
|        | H | 2.11168365  | 0.88964343  | -1.15580309 | 1663.6525, 3019.9318, 3032.9627,      |
|        | C | 3.88904144  | -0.15086622 | -0.51771857 | 3038.1347, 3050.3821, 3053.3333,      |
|        | H | 4.16722737  | -1.03484870 | 0.05820345  | 3056.6885, 3065.7318, 3067.5763,      |
|        | H | 4.35359189  | 0.71316627  | -0.04052991 | 3073.3923, 3092.1522, 3096.1919,      |
|        | H | 4.31588717  | -0.25330469 | -1.51475412 | 3118.4794, 3123.2458, 3132.4831,      |
|        | O | -2.53230293 | 2.00966323  | -0.57316607 | 3142.6581, 3782.1999                  |
|        | H | -2.34346053 | 2.41508436  | 0.28829589  |                                       |
|        | C | -2.79419721 | -1.67194202 | -0.18955800 |                                       |
|        | H | -2.38570562 | -2.63093677 | 0.13702561  | 485.8051i, 31.7160, 56.7241, 68.6120, |
|        | H | -3.82882074 | -1.61416831 | 0.14443549  | 96.2833, 110.8540, 129.5495,          |
|        | H | -2.78795334 | -1.66094974 | -1.27961485 | 132.7628, 205.0303, 232.2437,         |
|        | C | -0.52448896 | -0.50860825 | -0.11205060 | 247.0648, 275.4139, 312.6563,         |
|        | H | -0.05167374 | -1.45135959 | 0.18143472  | 402.9698, 517.1360, 622.6566,         |
|        | H | -0.50655651 | -0.48034823 | -1.20606280 | 731.8492, 759.7984, 834.8292,         |
|        | C | -1.96449223 | -0.53013355 | 0.36220818  | 855.7770, 874.6447, 922.9916,         |
|        | H | -2.44957700 | 0.44418916  | 0.00295009  | 940.6843, 989.5298, 1037.7992,        |
|        | H | -2.01393455 | -0.49158505 | 1.45323283  | 1058.0932, 1080.7538, 1092.4687,      |
|        | C | 0.26587003  | 0.67161773  | 0.44130936  | 1110.3955, 1161.9007, 1193.4866,      |
|        | H | 0.31109788  | 0.59171600  | 1.53236121  | 1231.8695, 1245.6617, 1273.8365,      |
|        | H | -0.28374538 | 1.58866398  | 0.21500622  | 1293.5840, 1310.5621, 1330.3684,      |
|        | C | 1.68242471  | 0.78480736  | -0.11446885 | 1341.6191, 1346.6417, 1370.3817,      |
|        | H | 2.14956993  | 1.69079719  | 0.28070672  | 1401.8256, 1407.1809, 1409.7131,      |
|        | H | 1.63476706  | 0.91390397  | -1.20028434 | 1412.8353, 1478.5954, 1486.8967,      |
|        | C | 2.57793399  | -0.40703655 | 0.20690687  | 1493.5832, 1496.6863, 1498.7909,      |
|        | H | 2.56035761  | -0.58747708 | 1.28567261  | 1500.8283, 1504.2355, 1512.1292,      |
|        | H | 2.17818784  | -1.30763583 | -0.26326303 | 1667.7920, 3030.4383, 3035.1711,      |
|        | C | 4.01271131  | -0.19118712 | -0.25709905 | 3038.5851, 3047.4690, 3053.9535,      |
|        | H | 4.45046690  | 0.68180270  | 0.22900416  | 3056.4137, 3059.9084, 3069.4732,      |
|        | H | 4.04833772  | -0.02099455 | -1.33417467 | 3073.4478, 3090.3548, 3092.4091,      |
|        | H | 4.64274277  | -1.05134813 | -0.03333729 | 3119.1374, 3123.3734, 3131.1937,      |
|        | O | -3.02686542 | 1.79362974  | -0.34109281 | 3141.6236, 3784.3282                  |
|        | H | -2.98720727 | 2.15158669  | 0.56016222  |                                       |
|        | C | -3.32603258 | -0.99556508 | 0.20415466  |                                       |
|        | H | -3.27202729 | -2.01946726 | 0.58099596  | 489.6793i, 31.6740, 56.6663, 72.3463, |
|        | H | -4.16762421 | -0.50179950 | 0.68698701  | 86.1667, 97.9002, 124.4762, 142.7762, |
|        | H | -3.52873785 | -1.04476145 | -0.86580541 | 147.8580, 234.0984, 243.6832,         |
|        | C | -0.81390040 | -0.86670260 | -0.21911323 | 287.8129, 356.8338, 396.6211,         |
|        | H | -0.68282853 | -1.89669342 | 0.13261170  | 494.5242, 626.2990, 733.1875,         |
|        | H | -1.00846657 | -0.93135807 | -1.29345557 | 764.6776, 806.1306, 859.3944,         |
|        | C | -2.02373476 | -0.26742080 | 0.46992598  | 889.0809, 924.8947, 945.8151,         |
|        | H | -2.14773039 | 0.79910993  | 0.06758441  | 984.9387, 1026.9202, 1059.1954,       |
|        | H | -1.84348480 | -0.15042664 | 1.54122585  | 1083.8023, 1096.3660, 1108.5766,      |
|        | C | 0.46916568  | -0.08178799 | 0.02042795  | 1161.9577, 1192.3845, 1236.0643,      |
| SP2_9  |   |             |             |             |                                       |
| SP2_10 |   |             |             |             |                                       |



|        |   |             |             |             |                                       |
|--------|---|-------------|-------------|-------------|---------------------------------------|
|        | H | 0.63681808  | 0.00355467  | 1.09757648  | 1241.7181, 1260.2228, 1300.6820,      |
|        | H | 0.33851411  | 0.93605547  | -0.36091154 | 1312.5081, 1329.3979, 1343.2431,      |
|        | C | 1.68336062  | -0.71884893 | -0.64588636 | 1345.5215, 1379.4870, 1390.6015,      |
|        | H | 1.45591815  | -0.88659815 | -1.70179315 | 1405.9402, 1410.4773, 1415.7931,      |
|        | H | 1.85646744  | -1.70665049 | -0.20680413 | 1479.1967, 1484.6273, 1492.5529,      |
|        | C | 2.95952760  | 0.11154458  | -0.53454650 | 1493.3991, 1499.4038, 1505.3540,      |
|        | H | 3.75397945  | -0.38382000 | -1.09575177 | 1506.9047, 1512.2120, 1666.6601,      |
|        | H | 2.79886717  | 1.07943897  | -1.01655069 | 3024.3260, 3033.0575, 3043.1243,      |
|        | C | 3.42062495  | 0.32825160  | 0.90263819  | 3049.7784, 3054.1606, 3058.1512,      |
|        | H | 3.53159459  | -0.62630552 | 1.42062446  | 3060.1480, 3068.5465, 3078.0539,      |
|        | H | 2.70805290  | 0.93042982  | 1.46574198  | 3086.6743, 3095.7234, 3119.2108,      |
|        | H | 4.38163015  | 0.84030234  | 0.93576675  | 3125.4839, 3135.0830, 3141.9304,      |
|        | O | -2.17042398 | 2.24020369  | -0.36965140 | 3783.0605                             |
|        | H | -1.66161715 | 2.58053507  | 0.38356469  |                                       |
|        | C | 3.10246454  | -0.91647504 | -0.63929322 |                                       |
|        | H | 3.08293761  | -2.00346849 | -0.74232331 | 630.4337i, 25.3223, 54.2992, 71.3884, |
|        | H | 3.59202709  | -0.50783678 | -1.52283834 | 95.4763, 97.7135, 116.7725, 126.9891, |
|        | H | 3.71423394  | -0.68375032 | 0.23414731  | 205.9553, 234.9617, 246.7343,         |
|        | C | 0.98289065  | -0.87796886 | 0.76739413  | 280.9598, 310.7543, 407.6885,         |
|        | H | 0.81344118  | -1.95570111 | 0.65900087  | 516.9980, 623.6318, 729.9673,         |
|        | H | 1.64733860  | -0.75303274 | 1.62612888  | 746.5862, 784.9840, 856.5185,         |
|        | C | 1.69691820  | -0.37463380 | -0.47298034 | 871.5116, 918.6869, 950.4715,         |
|        | H | 1.74572589  | 0.76923825  | -0.37852536 | 986.4585, 1038.8828, 1066.4822,       |
|        | H | 1.10447978  | -0.53477368 | -1.37522933 | 1075.0721, 1093.9498, 1116.9431,      |
|        | C | -0.34278728 | -0.17608931 | 1.04832350  | 1164.2911, 1168.3579, 1229.6327,      |
|        | H | -0.15053537 | 0.88805232  | 1.21072074  | 1267.2155, 1272.1951, 1301.3366,      |
|        | H | -0.75824459 | -0.56499921 | 1.98144186  | 1307.7663, 1331.7855, 1342.1100,      |
|        | C | -1.37958781 | -0.33710321 | -0.05762543 | 1375.7806, 1389.0205, 1406.2995,      |
|        | H | -1.49579979 | -1.39959431 | -0.29845508 | 1409.4764, 1412.0293, 1413.4557,      |
|        | H | -1.02996516 | 0.15068031  | -0.97142567 | 1478.4453, 1487.3576, 1491.0689,      |
|        | C | -2.73671751 | 0.24516182  | 0.31790736  | 1498.1256, 1501.0543, 1501.6683,      |
|        | H | -3.10173371 | -0.25064616 | 1.22104589  | 1503.5382, 1513.2078, 1677.1673,      |
|        | H | -2.61233614 | 1.29994127  | 0.57562932  | 3023.8042, 3028.3741, 3045.4403,      |
|        | C | -3.76385169 | 0.10484831  | -0.79771605 | 3049.9913, 3050.4820, 3056.6346,      |
|        | H | -3.91574253 | -0.94455199 | -1.05489967 | 3063.5093, 3071.7407, 3081.0973,      |
|        | H | -3.42950587 | 0.62056365  | -1.69900819 | 3092.9247, 3097.6947, 3113.7575,      |
|        | H | -4.72864485 | 0.52239514  | -0.51179206 | 3122.8088, 3130.1446, 3131.5706,      |
|        | O | 2.13452314  | 2.16731774  | 0.00990597  | 3785.2887                             |
|        | H | 3.09016425  | 2.00250237  | -0.02892532 |                                       |
| SP2_11 | C | 3.10246454  | -0.91647504 | -0.63929322 |                                       |
|        | H | 3.08293761  | -2.00346849 | -0.74232331 | 630.4337i, 25.3223, 54.2992, 71.3884, |
|        | H | 3.59202709  | -0.50783678 | -1.52283834 | 95.4763, 97.7135, 116.7725, 126.9891, |
|        | H | 3.71423394  | -0.68375032 | 0.23414731  | 205.9553, 234.9617, 246.7343,         |
|        | C | 0.98289065  | -0.87796886 | 0.76739413  | 280.9598, 310.7543, 407.6885,         |
|        | H | 0.81344118  | -1.95570111 | 0.65900087  | 516.9980, 623.6318, 729.9673,         |
|        | H | 1.64733860  | -0.75303274 | 1.62612888  | 746.5862, 784.9840, 856.5185,         |
|        | C | 1.69691820  | -0.37463380 | -0.47298034 | 871.5116, 918.6869, 950.4715,         |
|        | H | 1.74572589  | 0.76923825  | -0.37852536 | 986.4585, 1038.8828, 1066.4822,       |
|        | H | 1.10447978  | -0.53477368 | -1.37522933 | 1075.0721, 1093.9498, 1116.9431,      |
|        | C | -0.34278728 | -0.17608931 | 1.04832350  | 1164.2911, 1168.3579, 1229.6327,      |
|        | H | -0.15053537 | 0.88805232  | 1.21072074  | 1267.2155, 1272.1951, 1301.3366,      |
|        | H | -0.75824459 | -0.56499921 | 1.98144186  | 1307.7663, 1331.7855, 1342.1100,      |
|        | C | -1.37958781 | -0.33710321 | -0.05762543 | 1375.7806, 1389.0205, 1406.2995,      |
|        | H | -1.49579979 | -1.39959431 | -0.29845508 | 1409.4764, 1412.0293, 1413.4557,      |
|        | H | -1.02996516 | 0.15068031  | -0.97142567 | 1478.4453, 1487.3576, 1491.0689,      |
|        | C | -2.73671751 | 0.24516182  | 0.31790736  | 1498.1256, 1501.0543, 1501.6683,      |
|        | H | -3.10173371 | -0.25064616 | 1.22104589  | 1503.5382, 1513.2078, 1677.1673,      |
|        | H | -2.61233614 | 1.29994127  | 0.57562932  | 3023.8042, 3028.3741, 3045.4403,      |
|        | C | -3.76385169 | 0.10484831  | -0.79771605 | 3049.9913, 3050.4820, 3056.6346,      |
|        | H | -3.91574253 | -0.94455199 | -1.05489967 | 3063.5093, 3071.7407, 3081.0973,      |
|        | H | -3.42950587 | 0.62056365  | -1.69900819 | 3092.9247, 3097.6947, 3113.7575,      |
|        | H | -4.72864485 | 0.52239514  | -0.51179206 | 3122.8088, 3130.1446, 3131.5706,      |
|        | O | 2.13452314  | 2.16731774  | 0.00990597  | 3785.2887                             |
|        | H | 3.09016425  | 2.00250237  | -0.02892532 |                                       |
| SP2_12 | C | -3.39941845 | -0.79704465 | -0.09838264 |                                       |
|        | H | -3.49708038 | -1.84626683 | 0.18953377  | 488.8594i, 27.7679, 51.4085, 71.4266, |
|        | H | -4.24421204 | -0.25210074 | 0.31950824  | 93.8716, 96.6940, 121.6878, 141.3373, |
|        | H | -3.46369022 | -0.74265368 | -1.18522441 | 148.2348, 234.7678, 245.4396,         |
|        | C | -0.85271992 | -0.91246529 | -0.19703652 | 287.2585, 356.3384, 396.3524,         |
|        | H | -0.87578815 | -1.97587357 | 0.06775526  | 494.1508, 621.6749, 735.2628,         |
|        | H | -0.90607825 | -0.86659426 | -1.28869816 | 766.2225, 809.0482, 865.1371,         |
|        | C | -2.07761922 | -0.23830667 | 0.38878021  | 886.3820, 924.1523, 944.4296,         |
|        | H | -2.03837965 | 0.86232753  | 0.07004824  | 985.1109, 1028.6411, 1059.8216,       |
|        | H | -2.02843114 | -0.22370409 | 1.48030331  | 1084.4062, 1094.7576, 1107.6257,      |
|        | C | 0.45845822  | -0.29735030 | 0.27407161  | 1161.1960, 1194.9466, 1232.5402,      |
|        | H | 0.51272776  | -0.35065130 | 1.36701980  | 1238.9408, 1260.1334, 1298.2965,      |
|        | H | 0.45717728  | 0.76270709  | 0.00971287  | 1314.6550, 1330.1751, 1342.4186,      |
|        | C | 1.68085254  | -0.98494879 | -0.32328118 | 1346.3583, 1378.5362, 1390.8329,      |
|        | H | 1.66217898  | -0.86258752 | -1.41079201 | 1406.3635, 1410.6505, 1415.6764,      |
|        | H | 1.61050187  | -2.05922401 | -0.13267406 | 1479.5347, 1485.3309, 1492.8476,      |
|        | C | 3.01065708  | -0.46601462 | 0.21800534  | 1493.6597, 1499.1577, 1504.9961,      |
|        | H | 3.04393330  | -0.62667036 | 1.29901739  | 1507.1622, 1512.5050, 1669.2001,      |
|        | H | 3.82178321  | -1.06074731 | -0.20621847 | 3024.8092, 3028.7895, 3040.3479,      |

|        |             |             |             |                                  |                                       |
|--------|-------------|-------------|-------------|----------------------------------|---------------------------------------|
|        | C           | 3.25696091  | 1.00774118  | -0.08588292                      | 3047.4696, 3053.3428, 3059.9375,      |
|        | H           | 2.53550439  | 1.64782177  | 0.42108767                       | 3061.0197, 3071.4272, 3077.5164,      |
|        | H           | 3.17435235  | 1.19984650  | -1.15714885                      | 3085.7348, 3098.1521, 3118.5740,      |
|        | H           | 4.25193895  | 1.31536486  | 0.23392865                       | 3127.1498, 3136.1690, 3141.5338,      |
|        | O           | -1.86629184 | 2.32970743  | -0.22439914                      | 3784.7700                             |
|        | H           | -1.54913050 | 2.57168133  | 0.66039044                       |                                       |
| SP2_13 | C           | 2.83196382  | 1.53453431  | -0.23730664                      | 641.6415i, 32.9126, 49.7882, 68.6565, |
|        | H           | 2.44835198  | 2.54498904  | -0.08224097                      | 87.1848, 102.0914, 116.1178,          |
|        | H           | 3.85453036  | 1.50550942  | 0.13776999                       | 127.6418, 207.4981, 234.5928,         |
|        | H           | 2.85407945  | 1.35682567  | -1.31409861                      | 243.8317, 275.4387, 312.7172,         |
|        | C           | 0.52796200  | 0.45840583  | -0.06633092                      | 406.8895, 517.4536, 620.7137,         |
|        | H           | 0.06785435  | 1.44340350  | 0.06259839                       | 725.4710, 743.7543, 788.5053,         |
|        | H           | 0.55228052  | 0.26485005  | -1.14376240                      | 853.7526, 872.0300, 921.3335,         |
|        | C           | 1.94874412  | 0.51798554  | 0.45741405                       | 949.1746, 988.5745, 1034.4461,        |
|        | H           | 2.39533821  | -0.52873253 | 0.30458845                       | 1058.3786, 1076.5690, 1104.7069,      |
|        | H           | 1.96490249  | 0.64749298  | 1.54237856                       | 1111.0349, 1153.9713, 1184.9439,      |
|        | C           | -0.30900236 | -0.61332777 | 0.62302670                       | 1224.4202, 1259.3933, 1280.4493,      |
|        | H           | -0.40225661 | -0.36590274 | 1.68517977                       | 1293.9205, 1309.2926, 1331.0341,      |
|        | H           | 0.23355461  | -1.55998111 | 0.56903393                       | 1344.8709, 1370.9044, 1397.3856,      |
|        | C           | -1.69986143 | -0.79299541 | 0.02236126                       | 1405.8002, 1408.4116, 1410.4406,      |
|        | H           | -2.20319179 | -1.62022502 | 0.52967718                       | 1413.5089, 1476.8703, 1486.5971,      |
|        | H           | -1.60447430 | -1.09045369 | -1.02673050                      | 1496.1086, 1498.2486, 1498.8743,      |
|        | C           | -2.58476223 | 0.44593134  | 0.11037812                       | 1500.9296, 1503.3952, 1511.7720,      |
|        | H           | -2.61336975 | 0.79250094  | 1.14749604                       | 1692.1511, 3028.5697, 3034.8370,      |
|        | H           | -2.14555934 | 1.25696275  | -0.47401795                      | 3040.8866, 3047.8060, 3050.7493,      |
|        | C           | -4.00082381 | 0.17919490  | -0.38380804                      | 3057.0068, 3059.2168, 3069.7673,      |
| H      | -4.47852010 | -0.60051557 | 0.21104189  | 3076.4699, 3091.3221, 3093.2368, |                                       |
| H      | -3.99024248 | -0.15807656 | -1.42135681 | 3112.4555, 3123.7581, 3131.2465, |                                       |
| H      | -4.62253918 | 1.07214739  | -0.32847993 | 3131.6310, 3785.6806             |                                       |
| O      | 2.97753058  | -1.75803766 | -0.32994807 |                                  |                                       |
| H      | 3.58369620  | -1.27486570 | -0.91389957 |                                  |                                       |
| SP2_14 | C           | 2.83150514  | 1.53474119  | -0.23723440                      | 641.6507i, 32.9289, 49.8221, 68.7402, |
|        | H           | 2.44771693  | 2.54510678  | -0.08202398                      | 85.5563, 102.1387, 116.1544,          |
|        | H           | 3.85412084  | 1.50588110  | 0.13772394                       | 127.6189, 207.5425, 234.5996,         |
|        | H           | 2.85353019  | 1.35713686  | -1.31404466                      | 243.8265, 275.5040, 312.7597,         |
|        | C           | 0.52772154  | 0.45818855  | -0.06607497                      | 406.9118, 517.4656, 620.7474,         |
|        | H           | 0.06745732  | 1.44311248  | 0.06292490                       | 725.4943, 743.7761, 788.5039,         |
|        | H           | 0.55191723  | 0.26465721  | -1.14351488                      | 853.7972, 872.0362, 921.3348,         |
|        | C           | 1.94855797  | 0.51795619  | 0.45748781                       | 949.2105, 988.6083, 1034.4500,        |
|        | H           | 2.39529589  | -0.52866924 | 0.30445032                       | 1058.3793, 1076.5679, 1104.7252,      |
|        | H           | 1.96484406  | 0.64732892  | 1.54246644                       | 1111.0240, 1153.9726, 1184.9504,      |
|        | C           | -0.30907434 | -0.61363451 | 0.62334267                       | 1224.4362, 1259.4169, 1280.4923,      |
|        | H           | -0.40256891 | -0.36606354 | 1.68543900                       | 1293.9432, 1309.2984, 1331.0374,      |
|        | H           | 0.23361045  | -1.56022505 | 0.56954576                       | 1344.8886, 1370.8864, 1397.3651,      |
|        | C           | -1.69978202 | -0.79334449 | 0.02240207                       | 1405.8009, 1408.4073, 1410.4435,      |
|        | H           | -2.20340713 | -1.62037088 | 0.52975116                       | 1413.5158, 1476.8808, 1486.6162,      |
|        | H           | -1.60416262 | -1.09099302 | -1.02661403                      | 1496.1178, 1498.2500, 1498.8842,      |
|        | C           | -2.58430434 | 0.44588801  | 0.10998771                       | 1500.9317, 1503.4050, 1511.7770,      |
|        | H           | -2.61253781 | 0.79300105  | 1.14693504                       | 1692.1538, 3028.5411, 3034.8428,      |
|        | H           | -2.14488405 | 1.25645467  | -0.47490753                      | 3040.8848, 3047.7951, 3050.7469,      |
|        | C           | -4.00057247 | 0.17945268  | -0.38378391                      | 3057.0226, 3059.1933, 3069.7660,      |
| H      | -4.47842791 | -0.59983997 | 0.21148165  | 3076.4692, 3091.3034, 3093.2388, |                                       |
| H      | -3.99035291 | -0.15822667 | -1.42120199 | 3112.4556, 3123.7731, 3131.2374, |                                       |
| H      | -4.62195291 | 1.07265219  | -0.32868134 | 3131.6358, 3785.6940             |                                       |
| O      | 2.97765716  | -1.75775622 | -0.33034876 |                                  |                                       |
| H      | 3.58423523  | -1.27437886 | -0.91370156 |                                  |                                       |
| SP2_15 | C           | -3.35575017 | -0.77544669 | -0.04801642                      | 641.5630i, 33.5222, 43.1115, 77.8583, |
|        | H           | -3.45572491 | -1.85709134 | 0.06296229                       |                                       |

|        |   |             |             |             |                                       |
|--------|---|-------------|-------------|-------------|---------------------------------------|
|        | H | -4.19186354 | -0.30891461 | 0.47202380  | 91.9232, 98.6333, 121.7780, 136.6682, |
|        | H | -3.44110855 | -0.54850136 | -1.11228462 | 150.3383, 235.0210, 245.8845,         |
|        | C | -0.81578632 | -0.86964265 | -0.22825019 | 288.5371, 357.8895, 397.2282,         |
|        | H | -0.82728932 | -1.96238436 | -0.14248573 | 496.5304, 623.1461, 725.7561,         |
|        | H | -0.90399047 | -0.64294432 | -1.29520722 | 750.1293, 782.1501, 847.8064,         |
|        | C | -2.02155878 | -0.30647911 | 0.49615002  | 885.5841, 923.0050, 952.0436,         |
|        | H | -1.95757064 | 0.83525456  | 0.39121111  | 984.4021, 1027.5595, 1058.3004,       |
|        | H | -1.94801759 | -0.46963107 | 1.57408822  | 1083.6809, 1104.7340, 1110.6482,      |
|        | C | 0.50611906  | -0.32549537 | 0.29709687  | 1155.6701, 1183.2971, 1218.7563,      |
|        | H | 0.60079623  | -0.56618003 | 1.36126352  | 1257.4567, 1270.7840, 1297.9410,      |
|        | H | 0.48441685  | 0.76404172  | 0.22363308  | 1313.1050, 1336.1126, 1345.3428,      |
|        | C | 1.71055921  | -0.88073637 | -0.45415170 | 1376.7943, 1385.8963, 1403.2443,      |
|        | H | 1.65051826  | -0.57090044 | -1.50231892 | 1409.4553, 1413.1429, 1416.6240,      |
|        | H | 1.65671145  | -1.97290185 | -0.45197584 | 1476.9313, 1484.7468, 1493.1520,      |
|        | C | 3.05514514  | -0.44411285 | 0.12228846  | 1498.3179, 1500.1630, 1504.1663,      |
|        | H | 3.13055231  | -0.79190746 | 1.15610735  | 1506.1414, 1512.6860, 1691.0651,      |
|        | H | 3.85510009  | -0.94203994 | -0.42898110 | 3023.9083, 3031.4047, 3040.6848,      |
|        | C | 3.27492398  | 1.06400892  | 0.07500982  | 3047.1928, 3051.2452, 3059.6182,      |
|        | H | 2.56736188  | 1.59245201  | 0.71299333  | 3060.6771, 3070.8635, 3078.4629,      |
|        | H | 3.14897403  | 1.44032983  | -0.94183807 | 3085.6337, 3099.8333, 3113.2116,      |
|        | H | 4.27867202  | 1.32652355  | 0.40746448  | 3126.5866, 3130.7815, 3136.7356,      |
|        | O | -1.99167549 | 2.22432439  | -0.17593096 | 3783.3581                             |
|        | H | -2.83604688 | 2.10762472  | -0.63996915 |                                       |
|        | C | -3.26853476 | -1.01297749 | 0.13351344  |                                       |
|        | H | -3.21635723 | -2.09758140 | 0.24826270  | 645.9520i, 30.1112, 48.1492, 80.4074, |
|        | H | -4.09847167 | -0.65372263 | 0.74131937  | 94.0122, 106.2237, 127.7092,          |
|        | H | -3.49357310 | -0.80714054 | -0.91453343 | 140.3314, 146.3342, 240.3355,         |
|        | C | -0.77054290 | -0.78133572 | -0.31274480 | 248.9985, 288.9553, 359.2625,         |
|        | H | -0.62986328 | -1.86536950 | -0.22913697 | 397.4147, 495.9978, 621.6167,         |
|        | H | -0.99995759 | -0.57994195 | -1.36345483 | 725.5936, 749.2654, 781.1618,         |
|        | C | -1.95614410 | -0.37213792 | 0.53733464  | 848.6702, 886.1068, 924.0743,         |
|        | H | -2.05068041 | 0.76754863  | 0.43137661  | 951.3360, 985.4013, 1027.7098,        |
|        | H | -1.75003118 | -0.51548927 | 1.60074561  | 1060.6902, 1083.2019, 1105.3904,      |
|        | C | 0.51735923  | -0.06560041 | 0.07271239  | 1111.1853, 1160.6688, 1175.0048,      |
|        | H | 0.72803164  | -0.25952256 | 1.12755573  | 1221.5615, 1259.4655, 1270.6944,      |
|        | H | 0.36472849  | 1.01380050  | -0.02265443 | 1299.2295, 1312.9589, 1337.0335,      |
|        | C | 1.70521041  | -0.49065686 | -0.78273489 | 1347.0164, 1378.9334, 1384.1391,      |
|        | H | 1.43652275  | -0.38050734 | -1.83667721 | 1402.5781, 1409.4117, 1413.2603,      |
|        | H | 1.90002242  | -1.55630706 | -0.62357836 | 1416.4518, 1477.7696, 1484.5275,      |
|        | C | 2.98146779  | 0.30037619  | -0.50659682 | 1493.2932, 1498.8358, 1500.9060,      |
|        | H | 3.75563326  | -0.02096473 | -1.20593596 | 1504.8547, 1506.1736, 1514.2840,      |
|        | H | 2.79726220  | 1.35765194  | -0.71391832 | 1689.9581, 3023.3161, 3032.0568,      |
|        | C | 3.49659385  | 0.14393752  | 0.91999316  | 3046.6283, 3050.3138, 3051.1726,      |
|        | H | 3.62922850  | -0.91067990 | 1.16928688  | 3057.9721, 3059.1922, 3069.6325,      |
|        | H | 2.80464523  | 0.57242112  | 1.64444320  | 3077.5142, 3086.9408, 3097.2269,      |
|        | H | 4.45716518  | 0.64144332  | 1.04912194  | 3113.5852, 3125.0439, 3129.5622,      |
|        | O | -2.33242583 | 2.13263626  | -0.12433570 | 3135.7455, 3785.1464                  |
|        | H | -3.20735562 | 1.90363940  | -0.47639966 |                                       |
|        | C | -2.98990625 | -1.13073246 | -0.67371015 |                                       |
|        | H | -2.85675790 | -2.21446197 | -0.68448309 | 648.5476i, 28.6505, 55.5520, 73.0032, |
|        | H | -4.03500532 | -0.92612350 | -0.44320653 | 78.7816, 94.9409, 117.5046, 133.0644, |
|        | H | -2.78115702 | -0.76750051 | -1.68165788 | 205.5515, 240.7768, 243.2850,         |
|        | C | -0.58262463 | -0.68341131 | 0.03396286  | 272.2688, 312.4978, 406.8938,         |
|        | H | -0.35363665 | -1.75610629 | 0.04201514  | 515.9644, 623.1419, 726.2585,         |
|        | H | -0.38450415 | -0.33086353 | -0.98127254 | 743.8395, 788.2124, 854.8998,         |
|        | C | -2.05572435 | -0.49062718 | 0.33300576  | 870.6327, 922.6207, 947.1701,         |
|        | H | -2.23707826 | 0.64388483  | 0.33946250  | 988.4123, 1032.8760, 1058.1032,       |
|        | H | -2.29683308 | -0.79490327 | 1.35436365  | 1079.5829, 1105.2730, 1111.3744,      |
| SP2_16 |   |             |             |             |                                       |
| SP2_17 |   |             |             |             |                                       |

|        |   |             |             |             |                                       |
|--------|---|-------------|-------------|-------------|---------------------------------------|
|        | C | 0.31916402  | 0.04168631  | 1.02630625  | 1163.9739, 1171.2803, 1224.6826,      |
|        | H | 0.03689780  | -0.25558517 | 2.03976820  | 1268.1092, 1273.3281, 1295.4986,      |
|        | H | 0.12591285  | 1.11561540  | 0.95245948  | 1311.0615, 1331.6315, 1343.5730,      |
|        | C | 1.80730408  | -0.22579192 | 0.82144258  | 1370.2440, 1397.5655, 1404.8742,      |
|        | H | 2.00556346  | -1.29616789 | 0.93898040  | 1409.0873, 1410.9273, 1413.9241,      |
|        | H | 2.37134378  | 0.27820942  | 1.61074127  | 1477.3601, 1486.6853, 1496.6614,      |
|        | C | 2.34295023  | 0.23407042  | -0.53055179 | 1498.7546, 1499.1275, 1501.0726,      |
|        | H | 1.86516316  | -0.33431226 | -1.33092947 | 1503.5618, 1512.2997, 1690.2735,      |
|        | H | 2.06601217  | 1.28029469  | -0.68693033 | 3019.2823, 3032.9645, 3045.1208,      |
|        | C | 3.85450507  | 0.07677197  | -0.63481298 | 3050.5078, 3051.0713, 3056.2144,      |
|        | H | 4.14559821  | -0.96502388 | -0.49146944 | 3065.1859, 3068.5351, 3076.3502,      |
|        | H | 4.35962328  | 0.66820120  | 0.13010166  | 3093.2019, 3095.2716, 3112.9224,      |
|        | H | 4.22702434  | 0.39738454  | -1.60712389 | 3122.9694, 3130.8922, 3131.0018,      |
|        | O | -2.42658031 | 2.06087415  | -0.11324565 | 3784.3748                             |
|        | H | -3.01953324 | 1.83867007  | -0.84870916 |                                       |
|        | C | -2.52823661 | -1.73781432 | -0.24961868 |                                       |
|        | H | -2.00735185 | -2.68912421 | -0.11954521 | 483.0545i, 27.4140, 57.6172, 67.3290, |
|        | H | -3.49977926 | -1.81554783 | 0.23551900  | 92.9818, 121.9643, 132.7240,          |
|        | H | -2.69221636 | -1.59106673 | -1.31730609 | 149.7534, 197.1721, 236.9952,         |
|        | C | -0.36041680 | -0.39456737 | -0.34114528 | 279.4230, 292.6979, 383.1290,         |
|        | H | 0.21875671  | -1.31969185 | -0.24552063 | 400.1067, 505.6675, 623.2165,         |
|        | H | -0.51066861 | -0.23521155 | -1.41354184 | 724.2252, 776.4320, 832.3563,         |
|        | C | -1.70548253 | -0.60311747 | 0.32666638  | 858.3830, 862.6847, 925.1926,         |
|        | H | -2.30786708 | 0.36046843  | 0.17598889  | 946.5913, 970.9747, 1033.9490,        |
|        | H | -1.58935795 | -0.70360695 | 1.40869869  | 1039.5490, 1080.1162, 1093.8845,      |
|        | C | 0.41995557  | 0.77537859  | 0.24541682  | 1118.2425, 1159.6303, 1176.9875,      |
|        | H | 0.62628855  | 0.57550850  | 1.30081248  | 1233.3788, 1241.5007, 1263.7882,      |
|        | H | -0.21530541 | 1.66396679  | 0.21699535  | 1294.5379, 1308.9529, 1331.5080,      |
|        | C | 1.72381276  | 1.07686688  | -0.49158422 | 1342.0791, 1361.9321, 1381.5320,      |
|        | H | 2.22341213  | 1.91321565  | 0.00434943  | 1389.8824, 1407.1483, 1410.9260,      |
|        | H | 1.48664000  | 1.41368189  | -1.50390825 | 1414.2150, 1476.8143, 1487.9056,      |
|        | C | 2.69641540  | -0.09971259 | -0.57317538 | 1493.7229, 1495.9155, 1499.7947,      |
|        | H | 2.27007570  | -0.88908565 | -1.19615479 | 1500.2265, 1506.9888, 1517.1689,      |
|        | H | 3.60156752  | 0.23216844  | -1.08487252 | 1669.9284, 3028.0584, 3045.1030,      |
|        | C | 3.06708142  | -0.67041300 | 0.79081177  | 3046.6362, 3053.6701, 3055.3421,      |
|        | H | 2.20557065  | -1.12514530 | 1.28133747  | 3056.9634, 3061.0986, 3073.4694,      |
|        | H | 3.44520802  | 0.11405959  | 1.44914010  | 3080.4225, 3091.1495, 3095.4068,      |
|        | H | 3.83763459  | -1.43547050 | 0.70359037  | 3118.4737, 3121.6559, 3130.9031,      |
|        | O | -3.01816369 | 1.68738565  | 0.10515394  | 3141.6961, 3783.7531                  |
|        | H | -2.82607295 | 1.95207182  | 1.01895765  |                                       |
| SP2_18 | C | -2.55025120 | 1.62183472  | 0.29786806  |                                       |
|        | H | -2.05254724 | 2.59200695  | 0.35527694  | 640.5201i, 34.7179, 51.0191, 71.2700, |
|        | H | -3.50006382 | 1.76527428  | -0.21652127 | 118.9517, 125.0585, 132.1195,         |
|        | H | -2.75639056 | 1.30068216  | 1.32049036  | 155.1247, 199.1060, 239.2704,         |
|        | C | -0.35836423 | 0.32205157  | 0.28467321  | 281.1183, 294.2471, 384.4738,         |
|        | H | 0.20891179  | 1.25609761  | 0.36458709  | 403.3288, 506.3887, 626.9802,         |
|        | H | -0.56306123 | -0.00393985 | 1.30966563  | 720.9697, 747.2742, 802.5613,         |
|        | C | -1.67073184 | 0.61410667  | -0.41425531 | 854.3048, 858.7139, 923.3966,         |
|        | H | -2.23068135 | -0.38592271 | -0.48210385 | 954.0031, 971.7731, 1032.8850,        |
|        | H | -1.50891457 | 0.88985265  | -1.45924637 | 1039.0770, 1075.1311, 1105.9852,      |
|        | C | 0.46801736  | -0.73927014 | -0.43174854 | 1118.0424, 1150.9786, 1176.3868,      |
|        | H | 0.72876431  | -0.37683124 | -1.42992065 | 1213.9680, 1256.4829, 1276.4583,      |
|        | H | -0.15663954 | -1.62294854 | -0.58007671 | 1294.4288, 1306.8139, 1331.9870,      |
|        | C | 1.73270838  | -1.14452207 | 0.32307559  | 1362.2703, 1378.7338, 1389.6065,      |
|        | H | 2.27167094  | -1.88924605 | -0.26839048 | 1399.0897, 1407.8805, 1411.7234,      |
|        | H | 1.44464759  | -1.63831752 | 1.25466883  | 1414.5135, 1475.5812, 1488.5174,      |
|        | C | 2.68130682  | 0.01046807  | 0.64416239  | 1496.4254, 1498.0301, 1500.0539,      |
|        | H | 2.20934651  | 0.68893848  | 1.35842567  | 1500.7515, 1507.3040, 1517.3914,      |
| SP2_19 | C | -2.55025120 | 1.62183472  | 0.29786806  |                                       |
|        | H | -2.05254724 | 2.59200695  | 0.35527694  | 640.5201i, 34.7179, 51.0191, 71.2700, |
|        | H | -3.50006382 | 1.76527428  | -0.21652127 | 118.9517, 125.0585, 132.1195,         |
|        | H | -2.75639056 | 1.30068216  | 1.32049036  | 155.1247, 199.1060, 239.2704,         |
|        | C | -0.35836423 | 0.32205157  | 0.28467321  | 281.1183, 294.2471, 384.4738,         |
|        | H | 0.20891179  | 1.25609761  | 0.36458709  | 403.3288, 506.3887, 626.9802,         |
|        | H | -0.56306123 | -0.00393985 | 1.30966563  | 720.9697, 747.2742, 802.5613,         |
|        | C | -1.67073184 | 0.61410667  | -0.41425531 | 854.3048, 858.7139, 923.3966,         |
|        | H | -2.23068135 | -0.38592271 | -0.48210385 | 954.0031, 971.7731, 1032.8850,        |
|        | H | -1.50891457 | 0.88985265  | -1.45924637 | 1039.0770, 1075.1311, 1105.9852,      |
|        | C | 0.46801736  | -0.73927014 | -0.43174854 | 1118.0424, 1150.9786, 1176.3868,      |
|        | H | 0.72876431  | -0.37683124 | -1.42992065 | 1213.9680, 1256.4829, 1276.4583,      |
|        | H | -0.15663954 | -1.62294854 | -0.58007671 | 1294.4288, 1306.8139, 1331.9870,      |
|        | C | 1.73270838  | -1.14452207 | 0.32307559  | 1362.2703, 1378.7338, 1389.6065,      |
|        | H | 2.27167094  | -1.88924605 | -0.26839048 | 1399.0897, 1407.8805, 1411.7234,      |
|        | H | 1.44464759  | -1.63831752 | 1.25466883  | 1414.5135, 1475.5812, 1488.5174,      |
|        | C | 2.68130682  | 0.01046807  | 0.64416239  | 1496.4254, 1498.0301, 1500.0539,      |
|        | H | 2.20934651  | 0.68893848  | 1.35842567  | 1500.7515, 1507.3040, 1517.3914,      |

|        |             |             |             |                                  |                                       |
|--------|-------------|-------------|-------------|----------------------------------|---------------------------------------|
|        | H           | 3.56185670  | -0.39221179 | 1.14801018                       | 1691.9210, 3026.4399, 3044.8978,      |
|        | C           | 3.11781321  | 0.79202792  | -0.58955769                      | 3048.7838, 3051.0459, 3055.3566,      |
|        | H           | 2.27752644  | 1.31239254  | -1.05061808                      | 3057.4315, 3061.0523, 3075.4280,      |
|        | H           | 3.54351894  | 0.12396879  | -1.34062552                      | 3080.4128, 3091.6033, 3096.9764,      |
|        | H           | 3.87044350  | 1.53879693  | -0.33926565                      | 3113.2629, 3122.8491, 3130.1785,      |
|        | O           | -3.02164399 | -1.61080835 | -0.12609073                      | 3131.0470, 3782.4137                  |
|        | H           | -3.69822747 | -1.13230642 | 0.37906341                       |                                       |
| SP2_20 | C           | -2.62491406 | -1.33658087 | -0.74959015                      | 498.8828i, 34.3878, 45.3492, 59.8027, |
|        | H           | -2.41348888 | -2.37585393 | -0.48497114                      | 74.4364, 91.2560, 117.0506, 137.8536, |
|        | H           | -3.67686831 | -1.26399825 | -1.02021457                      | 150.8267, 239.5330, 248.3784,         |
|        | H           | -2.03478890 | -1.08981877 | -1.63084958                      | 282.9649, 359.4574, 392.1429,         |
|        | C           | -0.86304710 | -0.51155410 | 0.92460326                       | 494.2736, 647.3909, 728.4884,         |
|        | H           | -0.74050739 | 0.18046514  | 1.76155234                       | 751.2972, 818.4724, 849.2266,         |
|        | H           | -0.69338884 | -1.51714490 | 1.32652054                       | 895.7897, 921.1544, 943.2183,         |
|        | C           | -2.29108138 | -0.42122619 | 0.41354601                       | 986.2496, 1025.9940, 1053.5624,       |
|        | H           | -2.43837954 | 0.65400273  | 0.04568685                       | 1080.4496, 1096.1523, 1105.8178,      |
|        | H           | -3.00350171 | -0.55102675 | 1.22986523                       | 1161.5034, 1190.1716, 1230.5476,      |
|        | C           | 0.19230942  | -0.20295145 | -0.13135404                      | 1239.9076, 1262.5967, 1301.4995,      |
|        | H           | -0.04746565 | 0.75547598  | -0.60171413                      | 1327.4987, 1334.0952, 1335.9643,      |
|        | H           | 0.15977950  | -0.95705209 | -0.92193518                      | 1360.1725, 1376.0184, 1392.7516,      |
|        | C           | 1.60119341  | -0.15153198 | 0.44482643                       | 1410.0935, 1411.4386, 1414.8799,      |
|        | H           | 1.82707760  | -1.10120156 | 0.94087346                       | 1475.6890, 1486.4477, 1492.8361,      |
|        | H           | 1.64635735  | 0.61753381  | 1.22228975                       | 1493.3110, 1503.1056, 1503.7227,      |
|        | C           | 2.66846670  | 0.13309934  | -0.60420474                      | 1505.9291, 1513.8594, 1675.9320,      |
|        | H           | 2.62576404  | -0.63853506 | -1.37721643                      | 3025.0661, 3028.9242, 3044.5572,      |
|        | H           | 2.43707551  | 1.07840218  | -1.10141748                      | 3050.3011, 3052.0831, 3056.3185,      |
|        | C           | 4.07058739  | 0.19153823  | -0.01238636                      | 3056.9119, 3068.7930, 3082.6849,      |
| H      | 4.32811654  | -0.75345290 | 0.46825376  | 3085.1543, 3096.6255, 3122.6142, |                                       |
| H      | 4.13938080  | 0.97532107  | 0.74334940  | 3122.9189, 3131.0981, 3146.0439, |                                       |
| H      | 4.82170887  | 0.39501198  | -0.77483890 | 3784.9306                        |                                       |
| O      | -2.54520183 | 2.13061256  | -0.25645561 |                                  |                                       |
| H      | -3.09634263 | 2.34221303  | 0.51376849  |                                  |                                       |
| SP2_21 | C           | 2.37212643  | 1.49697671  | -0.34269264                      | 612.4523i, 40.7463, 46.1426, 55.7358, |
|        | H           | 1.63449283  | 2.28684259  | -0.19442637                      | 106.5047, 113.5822, 123.3332,         |
|        | H           | 3.34678258  | 1.90623918  | -0.07761981                      | 136.6747, 149.6397, 239.9227,         |
|        | H           | 2.37908481  | 1.24892709  | -1.40625882                      | 247.0892, 267.2315, 357.9007,         |
|        | C           | 0.77891793  | -0.46084789 | 0.07877422                       | 396.2026, 480.9067, 640.6990,         |
|        | H           | 0.86923143  | -0.76940305 | -0.96690899                      | 727.9333, 753.1941, 799.7871,         |
|        | H           | 0.68864986  | -1.37765098 | 0.66559009                       | 843.9903, 886.8673, 919.9660,         |
|        | C           | 2.04155481  | 0.27377773  | 0.49148373                       | 948.1043, 989.6107, 1030.6856,        |
|        | H           | 2.90565025  | -0.47429234 | 0.39350245                       | 1053.3386, 1073.1634, 1092.7292,      |
|        | H           | 2.02691449  | 0.51604571  | 1.55679857                       | 1115.7361, 1146.1478, 1193.3006,      |
|        | C           | -0.49117669 | 0.36971996  | 0.25335525                       | 1233.3879, 1244.5959, 1271.8477,      |
|        | H           | -0.45114157 | 1.25031821  | -0.39319258                      | 1297.4552, 1330.2372, 1331.7915,      |
|        | H           | -0.54179762 | 0.74258107  | 1.28144800                       | 1335.0935, 1365.5834, 1391.9773,      |
|        | C           | -1.75535419 | -0.42014307 | -0.06051367                      | 1398.4442, 1406.5268, 1408.3705,      |
|        | H           | -1.80732012 | -1.29520606 | 0.59456356                       | 1413.3633, 1481.1553, 1487.3492,      |
|        | H           | -1.69563021 | -0.80723704 | -1.08255920                      | 1493.9025, 1498.9322, 1503.8116,      |
|        | C           | -3.02991446 | 0.39997082  | 0.09325275                       | 1504.0070, 1505.7751, 1514.5966,      |
|        | H           | -3.08358159 | 0.79060406  | 1.11272776                       | 1689.3151, 3031.5160, 3036.6870,      |
|        | H           | -2.97833397 | 1.27005599  | -0.56634175                      | 3046.7850, 3050.2836, 3051.5138,      |
|        | C           | -4.28467371 | -0.40623682 | -0.21563894                      | 3057.8224, 3058.5257, 3070.2279,      |
| H      | -4.36734140 | -1.26471121 | 0.45234585  | 3074.4994, 3087.4787, 3100.3197, |                                       |
| H      | -4.25942365 | -0.78533141 | -1.23825251 | 3117.5489, 3123.9183, 3128.1110, |                                       |
| H      | -5.18685356 | 0.19391495  | -0.10303985 | 3132.7704, 3784.6040             |                                       |
| O      | 4.05102324  | -1.28839189 | -0.12713491 |                                  |                                       |
| H      | 4.32355085  | -0.64386627 | -0.79942133 |                                  |                                       |
| SP2_22 | C           | 2.32065677  | 1.62094645  | -0.29260992                      | 460.3858i, 27.6498, 32.9724, 54.4711, |

|        |   |             |             |             |                                       |
|--------|---|-------------|-------------|-------------|---------------------------------------|
|        | H | 1.58204258  | 2.36043352  | 0.02123784  | 91.2675, 116.4486, 120.1108,          |
|        | H | 3.30497112  | 1.99624947  | -0.01681448 | 135.7594, 146.8754, 231.8468,         |
|        | H | 2.27968826  | 1.54486784  | -1.37986363 | 246.8913, 291.5164, 358.4846,         |
|        | C | 0.77753375  | -0.41789903 | -0.11706200 | 388.9194, 492.0255, 625.7767,         |
|        | H | 0.81600465  | -0.54808612 | -1.20227202 | 725.8967, 753.3320, 830.6390,         |
|        | H | 0.73322376  | -1.42037368 | 0.31499778  | 862.0872, 890.0999, 921.6904,         |
|        | C | 2.04810813  | 0.27299534  | 0.34739935  | 949.0833, 980.4412, 1033.8786,        |
|        | H | 2.91788969  | -0.41339313 | 0.06339338  | 1052.1225, 1084.2803, 1097.0311,      |
|        | H | 2.07365018  | 0.34286191  | 1.43768841  | 1107.2197, 1160.7150, 1196.9941,      |
|        | C | -0.49430623 | 0.34193318  | 0.25485849  | 1225.2126, 1238.4098, 1268.7835,      |
|        | H | -0.49698199 | 1.32033956  | -0.23244015 | 1295.0505, 1329.3132, 1331.0798,      |
|        | H | -0.50004504 | 0.53304224  | 1.33291764  | 1335.4364, 1343.6338, 1367.8628,      |
|        | C | -1.76138721 | -0.40969251 | -0.13231391 | 1392.5875, 1405.2618, 1409.6581,      |
|        | H | -1.76982649 | -1.38579586 | 0.36252651  | 1413.6173, 1481.5579, 1486.0781,      |
|        | H | -1.74670249 | -0.61290778 | -1.20767656 | 1493.1052, 1497.2946, 1499.8339,      |
|        | C | -3.03766076 | 0.34399263  | 0.21981294  | 1503.7640, 1505.1638, 1513.5546,      |
|        | H | -3.04832404 | 0.54832191  | 1.29359191  | 1696.5222, 3030.5759, 3036.0440,      |
|        | H | -3.02774793 | 1.31728462  | -0.27747684 | 3047.5587, 3050.4488, 3056.4211,      |
|        | C | -4.29548866 | -0.42071365 | -0.17110905 | 3057.3603, 3059.4895, 3066.0829,      |
|        | H | -4.33562397 | -1.38561612 | 0.33626473  | 3073.9707, 3086.9571, 3100.3640,      |
|        | H | -4.31434734 | -0.61174744 | -1.24498591 | 3121.8482, 3123.7374, 3131.9353,      |
|        | H | -5.19867940 | 0.13111570  | 0.08687458  | 3138.0400, 3786.3400                  |
|        | O | 4.12719939  | -1.29394332 | -0.14219339 |                                       |
|        | H | 4.36847865  | -1.35442460 | 0.79572846  |                                       |
|        | C | 1.74144951  | -1.13814003 | 1.26264689  |                                       |
|        | H | 1.78007353  | -2.22157133 | 1.12167324  | 561.2532i, 45.4804, 52.8809, 93.3547, |
|        | H | 2.48528655  | -0.86668740 | 2.00932080  | 107.2471, 134.6340, 174.8917,         |
|        | H | 0.75832270  | -0.89252309 | 1.66490156  | 179.4247, 221.9910, 249.9770,         |
|        | C | 1.07385546  | -0.80623373 | -1.19466683 | 288.2946, 308.5176, 350.0521,         |
|        | H | 1.26103514  | -0.14017070 | -2.04113658 | 444.1244, 526.5143, 659.4833,         |
|        | H | 1.34889477  | -1.81149737 | -1.52936313 | 753.6265, 776.6449, 800.2339,         |
|        | C | 2.00229971  | -0.42549686 | -0.04979466 | 841.1188, 853.2026, 908.7432,         |
|        | H | 1.93858059  | 0.70527708  | 0.15193094  | 953.8671, 972.7727, 1013.9710,        |
|        | H | 3.04154268  | -0.54313930 | -0.35967186 | 1047.3637, 1067.4910, 1097.3917,      |
|        | C | -0.41526416 | -0.79574296 | -0.85598374 | 1128.7085, 1156.6856, 1170.7185,      |
|        | H | -0.61418143 | -1.53886139 | -0.08133097 | 1207.5086, 1235.6157, 1262.3975,      |
|        | H | -0.97930655 | -1.11543431 | -1.73644545 | 1273.0132, 1311.7287, 1317.1134,      |
|        | C | -0.93420675 | 0.56644812  | -0.40726434 | 1343.3025, 1369.1173, 1378.8143,      |
|        | H | -0.64581522 | 1.31287088  | -1.15632593 | 1382.2124, 1405.7440, 1412.5920,      |
|        | H | -0.45160349 | 0.85181556  | 0.53294706  | 1415.3088, 1477.9267, 1488.9301,      |
|        | C | -2.44847895 | 0.61400672  | -0.21548408 | 1491.1899, 1493.2599, 1500.8673,      |
|        | H | -2.74369689 | 1.63655186  | 0.02647865  | 1510.8505, 1512.7038, 1517.8551,      |
|        | H | -2.93822259 | 0.36539668  | -1.16055180 | 1622.2227, 3019.4279, 3035.3331,      |
|        | C | -2.94383216 | -0.32400726 | 0.87999659  | 3049.6597, 3050.0503, 3053.6597,      |
|        | H | -2.41728814 | -0.13364400 | 1.81734585  | 3058.8655, 3067.5823, 3074.1537,      |
|        | H | -2.78530254 | -1.36897238 | 0.61546907  | 3088.7077, 3090.7565, 3100.8266,      |
|        | H | -4.00928902 | -0.18911271 | 1.06195191  | 3116.8880, 3125.9699, 3137.6703,      |
|        | O | 1.92868482  | 2.18559715  | 0.33438799  | 3143.0107, 3784.3768                  |
|        | H | 1.08655536  | 2.31992071  | -0.12899628 |                                       |
| SP2_23 | C | -1.85807909 | -0.98098413 | 1.16849289  |                                       |
|        | H | -1.05397740 | -1.62085520 | 1.53654023  | 616.8895i, 42.6549, 56.0443, 66.8165, |
|        | H | -2.40306296 | -0.60915080 | 2.03597756  | 100.3788, 110.5978, 132.8172,         |
|        | H | -2.53092156 | -1.60707843 | 0.57873381  | 187.7143, 210.4598, 255.3412,         |
|        | C | -0.67839174 | -0.27271450 | -0.98486328 | 264.1643, 308.1190, 364.2582,         |
|        | H | -1.44454733 | -0.74702485 | -1.60275923 | 425.6110, 523.9602, 637.5760,         |
|        | H | -0.34845003 | 0.61277334  | -1.53033239 | 724.9662, 759.3109, 801.1987,         |
|        | C | -1.30927014 | 0.15675411  | 0.32898134  | 844.6664, 880.8807, 896.8100,         |
|        | H | -2.17457790 | 0.85971075  | 0.05715575  | 949.5210, 962.6375, 1035.8907,        |
| SP2_24 | C | -1.85807909 | -0.98098413 | 1.16849289  |                                       |
|        | H | -1.05397740 | -1.62085520 | 1.53654023  | 616.8895i, 42.6549, 56.0443, 66.8165, |
|        | H | -2.40306296 | -0.60915080 | 2.03597756  | 100.3788, 110.5978, 132.8172,         |
|        | H | -2.53092156 | -1.60707843 | 0.57873381  | 187.7143, 210.4598, 255.3412,         |
|        | C | -0.67839174 | -0.27271450 | -0.98486328 | 264.1643, 308.1190, 364.2582,         |
|        | H | -1.44454733 | -0.74702485 | -1.60275923 | 425.6110, 523.9602, 637.5760,         |
|        | H | -0.34845003 | 0.61277334  | -1.53033239 | 724.9662, 759.3109, 801.1987,         |
|        | C | -1.30927014 | 0.15675411  | 0.32898134  | 844.6664, 880.8807, 896.8100,         |
|        | H | -2.17457790 | 0.85971075  | 0.05715575  | 949.5210, 962.6375, 1035.8907,        |

|        |   |             |             |             |                                       |
|--------|---|-------------|-------------|-------------|---------------------------------------|
|        | H | -0.63870426 | 0.79016713  | 0.91407365  | 1048.1862, 1060.0360, 1080.2436,      |
|        | C | 0.49492952  | -1.24462145 | -0.81504878 | 1128.2199, 1148.3698, 1163.3917,      |
|        | H | 0.92071253  | -1.44511691 | -1.80134538 | 1228.3712, 1237.4289, 1263.8393,      |
|        | H | 0.12075915  | -2.20119023 | -0.44370572 | 1305.9120, 1323.7745, 1330.9361,      |
|        | C | 1.60024487  | -0.74334805 | 0.11200591  | 1351.7162, 1372.6571, 1387.2378,      |
|        | H | 2.39159655  | -1.49615178 | 0.15640207  | 1400.1978, 1407.3530, 1410.8210,      |
|        | H | 1.21820663  | -0.64844917 | 1.13337889  | 1413.2130, 1484.0349, 1491.3666,      |
|        | C | 2.20984489  | 0.58738286  | -0.31500890 | 1492.1521, 1498.8013, 1502.9510,      |
|        | H | 2.52879953  | 0.51637010  | -1.35874648 | 1504.8525, 1509.6182, 1512.4340,      |
|        | H | 1.44952762  | 1.37095141  | -0.27989602 | 1682.9077, 3037.4666, 3048.6770,      |
|        | C | 3.38951602  | 0.98897525  | 0.56087219  | 3049.0450, 3051.1419, 3056.5015,      |
|        | H | 4.18160343  | 0.24053072  | 0.51189847  | 3060.0826, 3068.7105, 3076.9314,      |
|        | H | 3.08336627  | 1.07727729  | 1.60445566  | 3083.9869, 3092.2123, 3106.6020,      |
|        | H | 3.81157823  | 1.94527026  | 0.25428516  | 3114.2479, 3122.2452, 3127.5305,      |
|        | O | -3.52253878 | 1.41022227  | -0.28638333 | 3132.7602, 3784.2762                  |
|        | H | -4.02436422 | 0.73152370  | 0.19236235  |                                       |
|        | C | 2.21914931  | 1.59276712  | -0.61088463 | 496.3111i, 29.1550, 43.7484, 67.6441, |
|        | H | 1.95463954  | 2.53478105  | -0.12362696 | 80.3101, 88.1707, 107.2179, 141.3026, |
|        | H | 3.21869022  | 1.69771905  | -1.02922121 | 165.6505, 253.0963, 266.5063,         |
|        | H | 1.52592044  | 1.43755810  | -1.43612903 | 309.5281, 320.7162, 459.6469,         |
|        | C | 0.82555301  | 0.27588041  | 1.09712995  | 463.8396, 643.5451, 733.4221,         |
|        | H | 0.90443806  | -0.55753546 | 1.79962755  | 768.8250, 813.1534, 843.0744,         |
|        | H | 0.62470830  | 1.17005955  | 1.69871329  | 889.3324, 912.5341, 948.8525,         |
|        | C | 2.15734823  | 0.45129424  | 0.38693524  | 973.3397, 1019.0538, 1031.8248,       |
|        | H | 2.34526557  | -0.51544864 | -0.19910934 | 1079.6290, 1099.8773, 1109.5748,      |
|        | H | 2.97382096  | 0.51888356  | 1.10777607  | 1157.2346, 1186.2052, 1228.5368,      |
|        | C | -0.34855943 | 0.02364593  | 0.15782629  | 1232.7381, 1266.9555, 1303.1021,      |
|        | H | -0.10377211 | -0.81869463 | -0.49734768 | 1318.5373, 1334.3115, 1355.0120,      |
|        | H | -0.49321158 | 0.89290312  | -0.48620214 | 1370.9949, 1378.5026, 1381.2153,      |
|        | C | -1.64003437 | -0.27351525 | 0.91162017  | 1408.2379, 1411.8835, 1415.3252,      |
|        | H | -1.90798197 | 0.59534307  | 1.52189260  | 1475.4102, 1484.6281, 1491.8484,      |
|        | H | -1.45929531 | -1.09582879 | 1.60884922  | 1493.0209, 1503.8878, 1504.9880,      |
|        | C | -2.81633223 | -0.63460200 | 0.00774746  | 1507.0090, 1512.6390, 1677.0521,      |
|        | H | -2.56193853 | -1.52807872 | -0.56823334 | 3023.7717, 3030.9394, 3046.8553,      |
|        | H | -3.67182164 | -0.90232345 | 0.63081086  | 3049.3878, 3052.4277, 3057.7254,      |
|        | C | -3.22033027 | 0.48634961  | -0.94376627 | 3068.9497, 3073.5360, 3084.8482,      |
|        | H | -2.43607117 | 0.69736710  | -1.67009389 | 3086.5656, 3103.2600, 3123.1350,      |
|        | H | -3.42070617 | 1.40729977  | -0.39273934 | 3124.5808, 3135.2727, 3146.6235,      |
|        | H | -4.12082476 | 0.22642208  | -1.49915716 | 3783.1953                             |
|        | O | 2.54432607  | -1.88978629 | -0.79438481 |                                       |
|        | H | 3.21276609  | -2.17305685 | -0.15038028 |                                       |
| SP2_25 | C | 2.21914931  | 1.59276712  | -0.61088463 | 496.3111i, 29.1550, 43.7484, 67.6441, |
|        | H | 1.95463954  | 2.53478105  | -0.12362696 | 80.3101, 88.1707, 107.2179, 141.3026, |
|        | H | 3.21869022  | 1.69771905  | -1.02922121 | 165.6505, 253.0963, 266.5063,         |
|        | H | 1.52592044  | 1.43755810  | -1.43612903 | 309.5281, 320.7162, 459.6469,         |
|        | C | 0.82555301  | 0.27588041  | 1.09712995  | 463.8396, 643.5451, 733.4221,         |
|        | H | 0.90443806  | -0.55753546 | 1.79962755  | 768.8250, 813.1534, 843.0744,         |
|        | H | 0.62470830  | 1.17005955  | 1.69871329  | 889.3324, 912.5341, 948.8525,         |
|        | C | 2.15734823  | 0.45129424  | 0.38693524  | 973.3397, 1019.0538, 1031.8248,       |
|        | H | 2.34526557  | -0.51544864 | -0.19910934 | 1079.6290, 1099.8773, 1109.5748,      |
|        | H | 2.97382096  | 0.51888356  | 1.10777607  | 1157.2346, 1186.2052, 1228.5368,      |
|        | C | -0.34855943 | 0.02364593  | 0.15782629  | 1232.7381, 1266.9555, 1303.1021,      |
|        | H | -0.10377211 | -0.81869463 | -0.49734768 | 1318.5373, 1334.3115, 1355.0120,      |
|        | H | -0.49321158 | 0.89290312  | -0.48620214 | 1370.9949, 1378.5026, 1381.2153,      |
|        | C | -1.64003437 | -0.27351525 | 0.91162017  | 1408.2379, 1411.8835, 1415.3252,      |
|        | H | -1.90798197 | 0.59534307  | 1.52189260  | 1475.4102, 1484.6281, 1491.8484,      |
|        | H | -1.45929531 | -1.09582879 | 1.60884922  | 1493.0209, 1503.8878, 1504.9880,      |
|        | C | -2.81633223 | -0.63460200 | 0.00774746  | 1507.0090, 1512.6390, 1677.0521,      |
|        | H | -2.56193853 | -1.52807872 | -0.56823334 | 3023.7717, 3030.9394, 3046.8553,      |
|        | H | -3.67182164 | -0.90232345 | 0.63081086  | 3049.3878, 3052.4277, 3057.7254,      |
|        | C | -3.22033027 | 0.48634961  | -0.94376627 | 3068.9497, 3073.5360, 3084.8482,      |
|        | H | -2.43607117 | 0.69736710  | -1.67009389 | 3086.5656, 3103.2600, 3123.1350,      |
|        | H | -3.42070617 | 1.40729977  | -0.39273934 | 3124.5808, 3135.2727, 3146.6235,      |
|        | H | -4.12082476 | 0.22642208  | -1.49915716 | 3783.1953                             |
|        | O | 2.54432607  | -1.88978629 | -0.79438481 |                                       |
|        | H | 3.21276609  | -2.17305685 | -0.15038028 |                                       |
|        | C | -1.94026072 | 1.43751485  | 0.82999125  | 617.7057i, 36.7279, 50.9985, 55.9210, |
|        | H | -1.29960144 | 2.31335817  | 0.71358231  | 96.5474, 114.9819, 137.5550,          |
|        | H | -2.96416598 | 1.78779170  | 0.94888636  | 168.2145, 223.6223, 248.3694,         |
|        | H | -1.64860890 | 0.92590627  | 1.74866807  | 272.7541, 298.6653, 356.4392,         |
|        | C | -0.46021591 | -0.17021720 | -0.49437890 | 433.5214, 516.1700, 649.7354,         |
|        | H | -0.25726365 | -0.73505174 | 0.42120827  | 727.2816, 768.2119, 797.5410,         |
|        | H | -0.49192394 | -0.89475970 | -1.31386142 | 848.6787, 854.1672, 909.3304,         |
|        | C | -1.81294379 | 0.50738084  | -0.36047423 | 953.6132, 969.6091, 1019.8850,        |
|        | H | -2.61012028 | -0.30740744 | -0.23361823 | 1046.2736, 1058.9391, 1104.4213,      |
|        | H | -2.09344583 | 1.00622271  | -1.29120849 | 1118.6693, 1145.9948, 1169.0501,      |
|        | C | 0.68049309  | 0.81404771  | -0.74975882 | 1227.9378, 1243.8187, 1269.6619,      |
|        | H | 0.79990617  | 1.46712003  | 0.11711324  | 1304.9118, 1317.8114, 1332.5840,      |
|        | H | 0.40684555  | 1.46317406  | -1.58584520 | 1367.2221, 1377.0105, 1388.2885,      |
|        | C | 2.01026070  | 0.13031599  | -1.06414935 | 1390.5938, 1399.5191, 1410.9133,      |
|        | H | 2.77324563  | 0.89845757  | -1.21506387 | 1415.7482, 1479.2188, 1490.4478,      |
|        | H | 1.91851299  | -0.40763673 | -2.01123577 |                                       |
| SP2_26 | C | -1.94026072 | 1.43751485  | 0.82999125  | 617.7057i, 36.7279, 50.9985, 55.9210, |
|        | H | -1.29960144 | 2.31335817  | 0.71358231  | 96.5474, 114.9819, 137.5550,          |
|        | H | -2.96416598 | 1.78779170  | 0.94888636  | 168.2145, 223.6223, 248.3694,         |
|        | H | -1.64860890 | 0.92590627  | 1.74866807  | 272.7541, 298.6653, 356.4392,         |
|        | C | -0.46021591 | -0.17021720 | -0.49437890 | 433.5214, 516.1700, 649.7354,         |
|        | H | -0.25726365 | -0.73505174 | 0.42120827  | 727.2816, 768.2119, 797.5410,         |
|        | H | -0.49192394 | -0.89475970 | -1.31386142 | 848.6787, 854.1672, 909.3304,         |
|        | C | -1.81294379 | 0.50738084  | -0.36047423 | 953.6132, 969.6091, 1019.8850,        |
|        | H | -2.61012028 | -0.30740744 | -0.23361823 | 1046.2736, 1058.9391, 1104.4213,      |
|        | H | -2.09344583 | 1.00622271  | -1.29120849 | 1118.6693, 1145.9948, 1169.0501,      |
|        | C | 0.68049309  | 0.81404771  | -0.74975882 | 1227.9378, 1243.8187, 1269.6619,      |
|        | H | 0.79990617  | 1.46712003  | 0.11711324  | 1304.9118, 1317.8114, 1332.5840,      |
|        | H | 0.40684555  | 1.46317406  | -1.58584520 | 1367.2221, 1377.0105, 1388.2885,      |
|        | C | 2.01026070  | 0.13031599  | -1.06414935 | 1390.5938, 1399.5191, 1410.9133,      |
|        | H | 2.77324563  | 0.89845757  | -1.21506387 | 1415.7482, 1479.2188, 1490.4478,      |
|        | H | 1.91851299  | -0.40763673 | -2.01123577 |                                       |

|        |             |             |             |                                  |                                       |
|--------|-------------|-------------|-------------|----------------------------------|---------------------------------------|
|        | C           | 2.49313222  | -0.83876380 | 0.01519059                       | 1494.4102, 1497.0171, 1500.1362,      |
|        | H           | 1.81794823  | -1.69553034 | 0.07143522                       | 1501.3127, 1507.7524, 1517.9645,      |
|        | H           | 3.46273138  | -1.23895821 | -0.28614139                      | 1686.4120, 3030.7607, 3043.1994,      |
|        | C           | 2.61655913  | -0.19492457 | 1.39142752                       | 3051.9009, 3055.2063, 3056.5882,      |
|        | H           | 1.64344546  | 0.10630370  | 1.78167318                       | 3059.0238, 3063.2472, 3076.2694,      |
|        | H           | 3.24435711  | 0.69699719  | 1.34707296                       | 3080.8980, 3092.2553, 3100.3596,      |
|        | H           | 3.06070480  | -0.88207354 | 2.11047659                       | 3119.0884, 3122.4447, 3131.8726,      |
|        | O           | -3.34106777 | -1.56062231 | 0.14309094                       | 3139.6985, 3784.9523                  |
|        | H           | -2.55617348 | -2.13105816 | 0.12504230                       |                                       |
| SP2_27 | C           | 2.39189412  | -1.17592080 | 0.83673588                       | 612.6234i, 39.0901, 47.9159, 62.5644, |
|        | H           | 1.85672884  | -2.12493398 | 0.89319090                       | 90.9918, 95.5742, 124.8617, 138.4869, |
|        | H           | 3.45794449  | -1.40200899 | 0.82234897                       | 233.5964, 238.6145, 266.3091,         |
|        | H           | 2.16864270  | -0.61775030 | 1.74849916                       | 270.8325, 303.5540, 407.6572,         |
|        | C           | 0.54231940  | 0.10913536  | -0.37206733                      | 527.8974, 639.1638, 735.6344,         |
|        | H           | 0.40365504  | 0.75118839  | 0.50111241                       | 767.3226, 794.1974, 844.4536,         |
|        | H           | 0.36429916  | 0.73427123  | -1.25081436                      | 870.2905, 905.7929, 950.4279,         |
|        | C           | 1.97708634  | -0.38643753 | -0.39038602                      | 969.5815, 1039.7449, 1050.5963,       |
|        | H           | 2.64647621  | 0.54190443  | -0.46727393                      | 1064.4538, 1092.4944, 1119.5711,      |
|        | H           | 2.19230225  | -0.94128454 | -1.30669978                      | 1143.6736, 1184.2851, 1230.0631,      |
|        | C           | -0.48040412 | -1.02819061 | -0.35203032                      | 1245.4897, 1283.4539, 1305.3250,      |
|        | H           | -0.42406376 | -1.55428052 | 0.60480551                       | 1315.1886, 1334.5445, 1343.7066,      |
|        | H           | -0.21437326 | -1.75684417 | -1.12307755                      | 1366.6217, 1393.3691, 1400.1843,      |
|        | C           | -1.91456584 | -0.55714202 | -0.57751935                      | 1403.6725, 1409.6273, 1413.6335,      |
|        | H           | -2.57683007 | -1.42675319 | -0.60255418                      | 1480.0985, 1488.2506, 1496.8704,      |
|        | H           | -1.98974755 | -0.08445259 | -1.56181283                      | 1498.5607, 1501.8452, 1503.5393,      |
|        | C           | -2.42123161 | 0.41585253  | 0.48165605                       | 1505.0249, 1512.3970, 1691.0713,      |
|        | H           | -2.26722344 | -0.02184162 | 1.47227622                       | 3034.3729, 3040.0509, 3047.9814,      |
|        | H           | -1.82913889 | 1.33255134  | 0.45368033                       | 3050.9140, 3052.3210, 3057.0694,      |
|        | C           | -3.89306049 | 0.75904493  | 0.29143962                       | 3068.4342, 3068.6511, 3075.8534,      |
| H      | -4.51198669 | -0.13709254 | 0.35405435  | 3094.2568, 3101.1679, 3117.1801, |                                       |
| H      | -4.06106886 | 1.20806978  | -0.68859063 | 3124.0764, 3127.4958, 3132.1044, |                                       |
| H      | -4.24327197 | 1.46251718  | 1.04591083  | 3784.1132                        |                                       |
| O      | 3.50088742  | 1.72891124  | -0.13963607 |                                  |                                       |
| H      | 3.80832971  | 1.38739915  | 0.71506202  |                                  |                                       |
| SP2_28 | C           | 2.09841226  | 1.66249296  | -0.45201916                      | 622.4353i, 30.1515, 56.1062, 60.6448, |
|        | H           | 1.23591034  | 2.33118546  | -0.44180047                      | 96.5527, 114.0507, 116.0588,          |
|        | H           | 2.96775703  | 2.23644118  | -0.13571143                      | 130.5723, 159.9937, 238.9906,         |
|        | H           | 2.26213822  | 1.33902065  | -1.48092260                      | 275.3996, 305.6549, 318.6404,         |
|        | C           | 0.78410865  | -0.48708904 | -0.00844687                      | 448.0272, 463.3576, 656.0486,         |
|        | H           | 1.02377450  | -0.84816330 | -1.01429375                      | 735.9874, 756.2655, 784.3018,         |
|        | H           | 0.76790341  | -1.36255412 | 0.64700913                       | 844.3273, 880.5230, 910.1514,         |
|        | C           | 1.87204959  | 0.46731292  | 0.45251775                       | 955.7064, 980.1996, 1034.3595,        |
|        | H           | 2.86113345  | -0.11241078 | 0.49220953                       | 1038.9113, 1070.3689, 1105.5417,      |
|        | H           | 1.70694154  | 0.77380610  | 1.48816462                       | 1112.7617, 1143.2874, 1187.6427,      |
|        | C           | -0.60936078 | 0.13823355  | -0.02505265                      | 1227.6781, 1245.5685, 1277.5440,      |
|        | H           | -0.63831126 | 0.95858876  | -0.74766808                      | 1302.4270, 1319.1300, 1333.4720,      |
|        | H           | -0.81019793 | 0.57872481  | 0.95514686                       | 1362.0125, 1378.3147, 1380.7829,      |
|        | C           | -1.69405587 | -0.87423297 | -0.37677927                      | 1388.8539, 1403.6508, 1412.1736,      |
|        | H           | -1.72997110 | -1.64413743 | 0.40042876                       | 1415.1055, 1481.5818, 1486.2894,      |
|        | H           | -1.41254055 | -1.38356971 | -1.30235066                      | 1493.3723, 1495.1710, 1500.1535,      |
|        | C           | -3.08252164 | -0.26191752 | -0.54363433                      | 1504.7780, 1507.8350, 1512.2156,      |
|        | H           | -3.05565606 | 0.46904144  | -1.35607993                      | 1681.5193, 3029.0780, 3034.1009,      |
|        | H           | -3.77816524 | -1.04314528 | -0.85543376                      | 3047.0895, 3049.5934, 3056.8397,      |
|        | C           | -3.60884811 | 0.40362086  | 0.72317702                       | 3059.0144, 3062.5506, 3070.2852,      |
| H      | -3.00922995 | 1.27064344  | 0.99904065  | 3078.7351, 3087.3897, 3098.3994, |                                       |
| H      | -3.59030160 | -0.29438277 | 1.56230173  | 3120.6857, 3126.0827, 3135.8605, |                                       |
| H      | -4.63589163 | 0.74254103  | 0.59285683  | 3140.3647, 3784.1040             |                                       |
| O      | 3.98259885  | -1.06603891 | 0.21370451  |                                  |                                       |



|        |             |             |             |                                  |                                       |
|--------|-------------|-------------|-------------|----------------------------------|---------------------------------------|
|        | H           | 3.41521147  | -1.77384280 | -0.13110833                      |                                       |
| SP2_29 | C           | -1.48450735 | 1.54054021  | -0.00214690                      |                                       |
|        | H           | -0.46315108 | 1.91751667  | -0.08585563                      | 619.2429i, 35.3813, 47.5997, 67.2986, |
|        | H           | -2.11658535 | 2.16806646  | -0.63021446                      | 99.4905, 103.8402, 135.1918,          |
|        | H           | -1.79527110 | 1.66560084  | 1.03728640                       | 160.5058, 227.9941, 234.4032,         |
|        | C           | -0.85118798 | -0.88108295 | 0.51710827                       | 285.4128, 298.9121, 357.2475,         |
|        | H           | -1.34794742 | -0.85677036 | 1.49005355                       | 431.5785, 515.2365, 632.3268,         |
|        | H           | -0.96330001 | -1.89711437 | 0.13268057                       | 735.5832, 773.0598, 802.7571,         |
|        | C           | -1.56446253 | 0.08382608  | -0.41662493                      | 847.9585, 855.7435, 909.1165,         |
|        | H           | -2.66745073 | -0.23278385 | -0.42527934                      | 947.9075, 965.5923, 1022.0183,        |
|        | H           | -1.25209873 | -0.04871807 | -1.45407480                      | 1043.5861, 1059.4512, 1096.4007,      |
|        | C           | 0.63661495  | -0.57158163 | 0.70140410                       | 1126.2579, 1148.0961, 1164.0946,      |
|        | H           | 1.07066177  | -1.32026134 | 1.36993393                       | 1227.4009, 1233.8193, 1273.3812,      |
|        | H           | 0.74548101  | 0.38946140  | 1.20856538                       | 1307.0797, 1316.6298, 1334.6206,      |
|        | C           | 1.41924236  | -0.55981000 | -0.60786836                      | 1356.8133, 1376.4751, 1384.4179,      |
|        | H           | 1.08161817  | 0.27430537  | -1.23101386                      | 1392.4154, 1405.4580, 1412.7496,      |
|        | H           | 1.18874163  | -1.47240547 | -1.16504141                      | 1415.5996, 1480.8890, 1490.7652,      |
|        | C           | 2.92978589  | -0.44954715 | -0.41651034                      | 1493.2581, 1494.2166, 1501.1361,      |
| H      | 3.28174305  | -1.30745173 | 0.16240635  | 1505.3722, 1512.1598, 1513.0305, |                                       |
| H      | 3.41691501  | -0.51399515 | -1.39116125 | 1685.6165, 3034.1236, 3047.9729, |                                       |
| C      | 3.35615157  | 0.84113891  | 0.27467858  | 3048.8268, 3049.8885, 3056.6766, |                                       |
| H      | 2.99619329  | 0.88282761  | 1.30233186  | 3057.2522, 3069.7851, 3079.4965, |                                       |
| H      | 2.95810751  | 1.71047022  | -0.25291496 | 3087.1953, 3094.1645, 3104.4212, |                                       |
| H      | 4.44108291  | 0.93521328  | 0.30217066  | 3112.4560, 3123.9385, 3126.2130, |                                       |
| O      | -4.12471603 | -0.35806100 | -0.11085672 | 3136.7358, 3787.8161             |                                       |
| H      | -4.22683316 | 0.54962561  | 0.21673833  |                                  |                                       |
| SP2_30 | C           | 2.10903820  | 1.52890402  | -0.46463551                      |                                       |
|        | H           | 1.26824848  | 2.22386140  | -0.47545676                      | 609.7762i, 32.3602, 43.6531, 68.7944, |
|        | H           | 2.99242120  | 2.09000030  | -0.16027094                      | 102.6994, 106.8264, 117.6141,         |
|        | H           | 2.25836562  | 1.17702999  | -1.48762581                      | 131.4449, 167.8110, 251.6581,         |
|        | C           | 0.73277669  | -0.57025957 | 0.02899933                       | 280.9466, 301.3270, 320.2802,         |
|        | H           | 0.97464393  | -0.97470782 | -0.95822400                      | 446.7056, 466.7186, 637.6110,         |
|        | H           | 0.68747148  | -1.42286170 | 0.71039142                       | 735.3470, 761.8556, 801.4108,         |
|        | C           | 1.84517140  | 0.36375037  | 0.47019471                       | 843.3930, 879.7016, 909.3716,         |
|        | H           | 2.79943420  | -0.26930971 | 0.53725714                       | 956.1856, 974.8557, 1023.9446,        |
|        | H           | 1.68840752  | 0.70873517  | 1.49494833                       | 1036.7832, 1072.5847, 1104.6279,      |
|        | C           | -0.63916061 | 0.10044414  | -0.02071509                      | 1115.9949, 1142.2868, 1186.8945,      |
|        | H           | -0.63808722 | 0.89576545  | -0.77179648                      | 1224.8244, 1245.7283, 1277.8528,      |
|        | H           | -0.83476514 | 0.58094115  | 0.94176398                       | 1301.1587, 1317.0774, 1331.7053,      |
|        | C           | -1.75255977 | -0.88928155 | -0.34708635                      | 1355.6957, 1379.0812, 1383.0580,      |
|        | H           | -1.81855412 | -1.62981206 | 0.45605486                       | 1397.7360, 1402.9262, 1409.5535,      |
|        | H           | -1.47899066 | -1.43959216 | -1.25115969                      | 1416.0979, 1480.6338, 1485.9149,      |
|        | C           | -3.11965114 | -0.24032335 | -0.54830173                      | 1493.5915, 1499.5662, 1504.4492,      |
| H      | -3.06362859 | 0.46000443  | -1.38595591 | 1505.3485, 1507.5420, 1512.7775, |                                       |
| H      | -3.83700015 | -1.01020732 | -0.83850449 | 1689.4318, 3035.1966, 3040.8081, |                                       |
| C      | -3.63509603 | 0.48634620  | 0.68910199  | 3047.8982, 3049.1156, 3052.3702, |                                       |
| H      | -3.01066020 | 1.34366282  | 0.93915195  | 3058.4051, 3067.2362, 3072.7080, |                                       |
| H      | -3.64466421 | -0.18127518 | 1.55273631  | 3082.5662, 3088.4236, 3101.0613, |                                       |
| H      | -4.65005159 | 0.85201783  | 0.53772039  | 3118.2503, 3125.4217, 3127.9068, |                                       |
| O      | 4.08735633  | -0.96754380 | 0.22231348  | 3135.4145, 3786.1847             |                                       |
| H      | 4.36544644  | -0.34138364 | -0.46488211 |                                  |                                       |
| SP3_1  | C           | -3.61038672 | -0.34437990 | 0.28702098                       |                                       |
|        | H           | -3.67360237 | 0.70840065  | 0.01014846                       | 477.1113i, 35.3759, 50.6550, 64.7552, |
|        | H           | -4.49075258 | -0.85290822 | -0.10358749                      | 85.8293, 91.4346, 101.1574, 142.9729, |
|        | H           | -3.64220536 | -0.40792486 | 1.37584125                       | 161.3491, 242.5796, 249.8906,         |
|        | C           | -1.08394399 | -0.26100811 | 0.27256845                       | 252.4284, 307.8561, 425.0448,         |
|        | H           | -1.16283916 | 0.83623285  | -0.04918375                      | 486.5438, 618.7685, 731.5539,         |
| H      | -1.08088905 | -0.24136944 | 1.36671825  | 769.3307, 786.5420, 870.6493,    |                                       |

|       |   |             |             |             |                                       |
|-------|---|-------------|-------------|-------------|---------------------------------------|
|       | C | -2.32478673 | -0.95660333 | -0.25262482 | 900.1591, 930.3338, 946.9013,         |
|       | H | -2.27179302 | -2.01641515 | 0.01606296  | 1020.9362, 1027.0528, 1063.3426,      |
|       | H | -2.32063416 | -0.91421470 | -1.34413679 | 1085.5308, 1092.0143, 1102.0283,      |
|       | C | 0.23281296  | -0.78407819 | -0.26549582 | 1170.5614, 1202.2813, 1216.1582,      |
|       | H | 0.21412148  | -0.74737405 | -1.35846466 | 1247.2532, 1266.9629, 1297.5440,      |
|       | H | 0.33067793  | -1.84147622 | 0.00586594  | 1311.3114, 1328.3156, 1334.9144,      |
|       | C | 1.44044381  | -0.01203585 | 0.24906707  | 1347.8101, 1374.1044, 1397.7849,      |
|       | H | 1.45698631  | -0.05233160 | 1.34312908  | 1407.9073, 1412.7605, 1414.3317,      |
|       | H | 1.32882542  | 1.04211994  | -0.02140855 | 1478.5848, 1488.3142, 1490.9329,      |
|       | C | 2.76354529  | -0.53795049 | -0.29221705 | 1501.4215, 1502.2589, 1503.9537,      |
|       | H | 2.86770754  | -1.59299747 | -0.02561832 | 1509.8180, 1513.7503, 1678.8106,      |
|       | H | 2.74382203  | -0.49756026 | -1.38421005 | 3024.8084, 3033.3556, 3040.1976,      |
|       | C | 3.96065841  | 0.24561403  | 0.22969967  | 3048.1828, 3052.1832, 3057.1614,      |
|       | H | 4.01118209  | 0.19624590  | 1.31842463  | 3058.5247, 3062.4503, 3073.9200,      |
|       | H | 3.88584049  | 1.29730516  | -0.05005821 | 3084.7259, 3092.1518, 3123.5570,      |
|       | H | 4.89891921  | -0.14081410 | -0.16672586 | 3126.3047, 3132.1471, 3136.7462,      |
|       | O | -1.26838949 | 2.31503047  | -0.35834121 | 3782.6531                             |
|       | H | -1.21830907 | 2.60748888  | 0.56582196  |                                       |
|       | C | 3.25680301  | 0.22174301  | -0.25701063 | 657.0633i, 43.8786, 80.5453, 99.7402, |
|       | H | 2.98012953  | 1.27460598  | -0.30370485 | 117.5739, 123.3622, 149.0111,         |
|       | H | 4.21451148  | 0.14131553  | 0.25551481  | 193.0387, 239.3744, 256.1898,         |
|       | H | 3.39176408  | -0.13565295 | -1.27891463 | 288.1033, 301.5867, 389.4194,         |
|       | C | 0.82794497  | -0.48226098 | -0.23151619 | 403.7716, 492.6273, 666.6259,         |
|       | H | 0.58951833  | 0.64502031  | -0.26224254 | 712.8473, 741.6672, 805.1026,         |
|       | H | 0.89933468  | -0.76298946 | -1.28742907 | 843.4596, 863.0404, 926.0240,         |
|       | C | 2.17602070  | -0.57948687 | 0.45606427  | 941.2637, 970.6635, 1031.7456,        |
|       | H | 2.46460950  | -1.63391700 | 0.51266754  | 1041.8700, 1073.7401, 1094.7231,      |
|       | H | 2.07096735  | -0.23047348 | 1.48618850  | 1115.4228, 1148.7572, 1176.0401,      |
|       | C | -0.28983269 | -1.23513266 | 0.46527521  | 1186.3587, 1247.1642, 1270.1618,      |
|       | H | -0.46531194 | -0.79109801 | 1.44865222  | 1293.5841, 1303.2501, 1325.9368,      |
|       | H | 0.06022307  | -2.25395172 | 0.65931180  | 1356.5471, 1368.4871, 1383.3411,      |
|       | C | -1.59059819 | -1.31332290 | -0.33280015 | 1392.7327, 1407.1465, 1413.4446,      |
|       | H | -2.31531258 | -1.91184966 | 0.22536827  | 1415.7699, 1477.4412, 1485.1367,      |
|       | H | -1.39487309 | -1.85121957 | -1.26377619 | 1492.8019, 1502.5418, 1504.5529,      |
|       | C | -2.21841029 | 0.03922103  | -0.66474731 | 1509.3830, 1510.4623, 1521.9032,      |
|       | H | -1.52140907 | 0.62702788  | -1.26738273 | 1616.4435, 3035.7348, 3040.1796,      |
|       | H | -3.09326573 | -0.12436613 | -1.29610861 | 3046.4706, 3050.3920, 3054.0045,      |
|       | C | -2.64241783 | 0.82342229  | 0.57352967  | 3058.3724, 3062.1890, 3074.1674,      |
|       | H | -1.80520557 | 1.00758748  | 1.24963939  | 3082.1837, 3087.4752, 3093.9163,      |
|       | H | -3.38973522 | 0.26772203  | 1.14191436  | 3118.6614, 3125.3708, 3129.8631,      |
|       | H | -3.07892923 | 1.78633794  | 0.30679187  | 3142.2271, 3780.1184                  |
|       | O | 0.47106676  | 2.12258386  | -0.05536180 |                                       |
|       | H | -0.49260784 | 2.12013253  | 0.06363505  |                                       |
|       | C | 2.83141967  | -0.15109722 | 1.06404041  | 490.5207i, 49.3320, 67.3322, 77.3920, |
|       | H | 2.70267754  | 0.93133728  | 1.10508242  | 88.4002, 118.8053, 131.0148,          |
|       | H | 3.16071197  | -0.48793373 | 2.04604338  | 202.9397, 214.1855, 250.7974,         |
|       | H | 3.62688834  | -0.37067783 | 0.35009321  | 263.7763, 295.0318, 318.5237,         |
|       | C | 1.05943101  | -0.37105090 | -0.72193854 | 426.0745, 501.9921, 641.6633,         |
|       | H | 0.84957545  | 0.75542441  | -0.65340217 | 739.7593, 770.0443, 801.6406,         |
|       | H | 1.87068945  | -0.45787572 | -1.44928702 | 850.6609, 884.5998, 904.2528,         |
|       | C | 1.52878154  | -0.82135685 | 0.64882215  | 942.1714, 973.1171, 1048.7508,        |
|       | H | 1.65233551  | -1.90955969 | 0.63558328  | 1055.0429, 1066.9117, 1072.1203,      |
|       | H | 0.75561677  | -0.60821527 | 1.38949160  | 1121.3056, 1164.8603, 1173.8116,      |
|       | C | -0.19747650 | -1.04601808 | -1.25129693 | 1204.6085, 1250.3561, 1264.0655,      |
|       | H | 0.04755521  | -2.08786610 | -1.48228282 | 1293.6230, 1310.1107, 1315.7155,      |
|       | H | -0.47686771 | -0.57692460 | -2.19772703 | 1331.5605, 1343.6135, 1380.4601,      |
|       | C | -1.39227119 | -1.00998833 | -0.30113737 | 1396.1148, 1409.6276, 1411.2171,      |
|       | H | -1.17176137 | -1.59317512 | 0.59750260  |                                       |
| SP3_2 |   |             |             |             |                                       |
| SP3_3 |   |             |             |             |                                       |

|       |             |             |             |                                  |                                       |
|-------|-------------|-------------|-------------|----------------------------------|---------------------------------------|
|       | H           | -2.23643858 | -1.50959548 | -0.78352153                      | 1413.1572, 1477.9747, 1482.8828,      |
|       | C           | -1.81360292 | 0.39844352  | 0.10316412                       | 1489.6380, 1499.5442, 1503.6393,      |
|       | H           | -1.00616573 | 0.88605421  | 0.65327169                       | 1504.2049, 1509.4363, 1513.0262,      |
|       | H           | -1.96478727 | 1.00081792  | -0.79645744                      | 1727.8825, 3033.5580, 3036.7191,      |
|       | C           | -3.07959776 | 0.39637974  | 0.94979786                       | 3044.1543, 3053.5641, 3057.0786,      |
|       | H           | -2.93545419 | -0.18726309 | 1.86065563                       | 3058.6234, 3066.6303, 3069.4748,      |
|       | H           | -3.91347283 | -0.04695021 | 0.40333218                       | 3083.2344, 3089.0712, 3096.5606,      |
|       | H           | -3.36808292 | 1.40536683  | 1.24189104                       | 3121.3028, 3125.0037, 3132.2258,      |
|       | O           | 0.87822793  | 2.26464664  | -0.60879773                      | 3135.3064, 3783.8114                  |
|       | H           | 1.76105386  | 2.36799181  | -0.99859743                      |                                       |
| SP3_4 | C           | -3.32215986 | 0.09577554  | 0.69026616                       | 475.3830i, 31.1291, 53.1090, 78.2761, |
|       | H           | -3.26823225 | 1.11617167  | 0.30882962                       | 89.1954, 92.3512, 106.1466, 151.7039, |
|       | H           | -4.34658670 | -0.25530700 | 0.57408723                       | 216.1946, 242.9176, 255.8289,         |
|       | H           | -3.09648407 | 0.12268781  | 1.75750973                       | 271.3750, 310.2088, 412.2831,         |
|       | C           | -0.90134833 | -0.32882194 | 0.09765512                       | 516.7241, 615.1342, 738.5169,         |
|       | H           | -0.84555111 | 0.73215814  | -0.33788080                      | 772.0645, 807.1849, 865.1240,         |
|       | H           | -0.64141054 | -0.21759756 | 1.15333794                       | 885.6570, 921.4643, 945.4590,         |
|       | C           | -2.33575778 | -0.79797118 | -0.04914444                      | 990.8647, 1040.1307, 1057.2658,       |
|       | H           | -2.40673020 | -1.82460711 | 0.32445898                       | 1071.9432, 1096.7226, 1111.4872,      |
|       | H           | -2.59122343 | -0.83795636 | -1.11033092                      | 1164.1713, 1195.6254, 1216.8623,      |
|       | C           | 0.12888762  | -1.16330165 | -0.64187821                      | 1251.3319, 1273.7426, 1294.5324,      |
|       | H           | -0.23858927 | -1.36404803 | -1.65088873                      | 1301.9435, 1310.2951, 1327.6569,      |
|       | H           | 0.21137237  | -2.13505267 | -0.14174684                      | 1342.4624, 1373.6512, 1400.0549,      |
|       | C           | 1.50782447  | -0.51364968 | -0.72599350                      | 1407.8247, 1412.2716, 1412.7826,      |
|       | H           | 1.42962027  | 0.41048215  | -1.30500559                      | 1479.4376, 1485.7401, 1489.5165,      |
|       | H           | 2.18032154  | -1.17579472 | -1.27738551                      | 1496.3140, 1503.6227, 1503.9708,      |
|       | C           | 2.12939336  | -0.19585604 | 0.62937378                       | 1509.3472, 1511.5620, 1715.2996,      |
|       | H           | 1.52288007  | 0.55321500  | 1.14336307                       | 3026.9773, 3039.1021, 3039.5053,      |
| H     | 2.11286548  | -1.09254793 | 1.25609695  | 3049.3307, 3057.5782, 3057.8252, |                                       |
| C     | 3.55690704  | 0.31924122  | 0.49899035  | 3063.6678, 3073.1219, 3079.8608, |                                       |
| H     | 3.58513756  | 1.22000965  | -0.11567649 | 3092.0377, 3095.2002, 3124.8974, |                                       |
| H     | 4.19583292  | -0.42565727 | 0.02270793  | 3125.3754, 3131.8822, 3136.4916, |                                       |
| H     | 3.98905491  | 0.56103766  | 1.46943167  | 3783.0783                        |                                       |
| O     | -0.71345352 | 2.20235893  | -0.66541241 |                                  |                                       |
| H     | -0.66712848 | 2.50143755  | 0.25677550  |                                  |                                       |
| SP3_5 | C           | 3.07206213  | -0.69366390 | -0.64844676                      | 483.1972i, 34.8407, 56.5667, 72.1624, |
|       | H           | 3.25711868  | 0.37281582  | -0.77966318                      | 89.5385, 94.8803, 134.9884, 161.3875, |
|       | H           | 4.01281595  | -1.17389194 | -0.38276793                      | 205.3877, 253.7287, 272.9537,         |
|       | H           | 2.74888207  | -1.09674900 | -1.60930687                      | 293.2550, 383.8381, 408.2841,         |
|       | C           | 0.69491438  | -0.23994936 | 0.08118239                       | 506.6060, 622.5361, 728.8922,         |
|       | H           | 0.92319344  | 0.88165524  | -0.00754625                      | 781.4079, 803.0488, 854.1876,         |
|       | H           | 0.35450978  | -0.53739234 | -0.91452591                      | 867.1971, 925.9662, 962.9671,         |
|       | C           | 2.00852858  | -0.91944370 | 0.41771259                       | 970.5756, 1032.4606, 1037.8442,       |
|       | H           | 1.82465203  | -1.99125765 | 0.54514178                       | 1074.7727, 1098.5073, 1116.9796,      |
|       | H           | 2.36230981  | -0.55096880 | 1.38323862                       | 1161.9574, 1171.7581, 1236.8550,      |
|       | C           | -0.39895618 | -0.40539220 | 1.11849813                       | 1245.8940, 1264.9455, 1298.6320,      |
|       | H           | 0.01525706  | -0.19470509 | 2.10694334                       | 1305.9258, 1312.1383, 1328.5023,      |
|       | H           | -0.70848165 | -1.45554723 | 1.13511995                       | 1363.6960, 1383.4817, 1388.8249,      |
|       | C           | -1.61190815 | 0.49563804  | 0.88726044                       | 1405.9315, 1414.1154, 1415.4687,      |
|       | H           | -1.30536737 | 1.53312386  | 1.03907793                       | 1478.8055, 1486.7683, 1491.7196,      |
|       | H           | -2.36542858 | 0.27509378  | 1.64748495                       | 1496.6556, 1503.9452, 1504.8165,      |
|       | C           | -2.25157353 | 0.35751754  | -0.49402688                      | 1508.9025, 1514.0369, 1677.4490,      |
|       | H           | -3.11372103 | 1.02461429  | -0.54676692                      | 3035.2783, 3039.9930, 3046.8642,      |
| H     | -1.55522488 | 0.70360297  | -1.26298953 | 3049.9333, 3057.4721, 3059.5084, |                                       |
| C     | -2.69137913 | -1.06597015 | -0.81620261 | 3063.5488, 3078.8647, 3083.9123, |                                       |
| H     | -3.35166780 | -1.45085763 | -0.03693570 | 3090.1802, 3095.7906, 3122.7926, |                                       |
| H     | -1.83808550 | -1.74127199 | -0.88827520 | 3127.2655, 3132.9892, 3137.5090, |                                       |
| H     | -3.22789028 | -1.11073452 | -1.76310884 |                                  |                                       |

|       |             |             |             |                                  |                                       |
|-------|-------------|-------------|-------------|----------------------------------|---------------------------------------|
|       | O           | 1.08247792  | 2.36413649  | -0.25297217                      | 3777.5360                             |
|       | H           | 0.37717623  | 2.42696071  | -0.91720674                      |                                       |
| SP3_6 | C           | -3.39885661 | -0.85850283 | 0.18044447                       |                                       |
|       | H           | -3.68770786 | 0.16176956  | -0.07405767                      | 473.8533i, 33.4664, 51.2043, 65.3573, |
|       | H           | -4.12785231 | -1.53785839 | -0.25918558                      | 89.8459, 99.8306, 114.8324, 138.2084, |
|       | H           | -3.45453411 | -0.96371189 | 1.26512210                       | 158.1295, 237.7195, 254.4300,         |
|       | C           | -0.95592311 | -0.21574185 | 0.27954660                       | 287.7242, 359.8140, 396.4509,         |
|       | H           | -1.26622799 | 0.84941936  | -0.00745091                      | 496.0383, 622.3298, 741.1783,         |
|       | H           | -0.99239795 | -0.24189454 | 1.37307022                       | 771.1582, 789.3084, 874.5784,         |
|       | C           | -1.99003558 | -1.14911643 | -0.31918103                      | 884.6751, 923.1511, 949.8660,         |
|       | H           | -1.71199923 | -2.18007460 | -0.07852510                      | 984.3854, 1030.9951, 1054.3339,       |
|       | H           | -1.95588151 | -1.06586687 | -1.40780895                      | 1081.6705, 1099.6538, 1108.1289,      |
|       | C           | 0.46227346  | -0.40820033 | -0.22020927                      | 1162.6759, 1194.1368, 1210.4443,      |
|       | H           | 0.47592476  | -0.31373589 | -1.31050331                      | 1246.1136, 1274.1851, 1294.7487,      |
|       | H           | 0.77264290  | -1.43318875 | 0.00638141                       | 1306.9619, 1330.9552, 1334.7872,      |
|       | C           | 1.44359105  | 0.58687058  | 0.38927377                       | 1361.3853, 1378.5888, 1392.3969,      |
|       | H           | 1.48815366  | 0.42715898  | 1.47159271                       | 1403.2449, 1411.3876, 1415.5253,      |
|       | H           | 1.05079740  | 1.59500860  | 0.23667390                       | 1477.0848, 1487.1488, 1492.1770,      |
|       | C           | 2.85281507  | 0.49903998  | -0.19040497                      | 1498.1581, 1503.0224, 1505.4781,      |
| H     | 2.81060320  | 0.70701339  | -1.26269402 | 1509.9425, 1512.0901, 1683.2120, |                                       |
| H     | 3.46595778  | 1.28664111  | 0.25130858  | 3030.9503, 3036.9118, 3040.1315, |                                       |
| C     | 3.52396205  | -0.85034864 | 0.04123574  | 3050.8035, 3052.0875, 3057.7702, |                                       |
| H     | 3.00860014  | -1.65060604 | -0.48948979 | 3058.1661, 3068.3386, 3083.7114, |                                       |
| H     | 3.52652689  | -1.10333634 | 1.10325861  | 3086.6780, 3093.4484, 3124.8278, |                                       |
| H     | 4.55762966  | -0.84132540 | -0.30269236 | 3125.6006, 3134.3863, 3135.4843, |                                       |
| O     | -1.71157062 | 2.27424185  | -0.26760794 | 3783.3794                        |                                       |
| H     | -1.89462831 | 2.48665007  | 0.66163186  |                                  |                                       |
| SP3_7 | C           | -3.02476896 | 0.15638954  | -0.44997714                      |                                       |
|       | H           | -2.77317633 | 1.21227491  | -0.54865405                      | 608.2959i, 52.6061, 83.2535, 89.5203, |
|       | H           | -3.65054815 | -0.12782087 | -1.29493892                      | 126.9464, 129.7528, 176.2764,         |
|       | H           | -3.61310931 | 0.03597587  | 0.46059199                       | 190.2838, 245.7848, 270.9584,         |
|       | C           | -0.85792161 | -0.28168426 | 0.76632580                       | 289.7035, 317.8186, 369.8890,         |
|       | H           | -0.56406632 | 0.81930898  | 0.57484340                       | 428.2936, 530.3371, 678.9533,         |
|       | H           | -1.43384736 | -0.20683539 | 1.69179474                       | 731.7226, 749.6937, 797.7751,         |
|       | C           | -1.75607800 | -0.68360124 | -0.38848951                      | 842.6392, 879.0726, 892.6528,         |
|       | H           | -2.00804325 | -1.74463334 | -0.28230065                      | 943.1073, 962.3012, 1014.9039,        |
|       | H           | -1.20904177 | -0.59125238 | -1.32919207                      | 1044.1667, 1061.4706, 1073.6045,      |
|       | C           | 0.37429201  | -1.14606617 | 0.98130371                       | 1109.0539, 1141.7234, 1163.4940,      |
|       | H           | 0.03551551  | -2.12183825 | 1.34419913                       | 1182.5853, 1233.0087, 1258.1958,      |
|       | H           | 0.97652580  | -0.72314919 | 1.78784770                       | 1296.4350, 1302.3275, 1315.7925,      |
|       | C           | 1.23929711  | -1.36952256 | -0.26011785                      | 1332.0169, 1365.9492, 1384.6665,      |
|       | H           | 0.67062852  | -1.93988517 | -0.99724378                      | 1395.6565, 1406.7814, 1412.9591,      |
|       | H           | 2.09148154  | -1.99463100 | 0.01885118                       | 1415.3034, 1480.1240, 1485.7192,      |
|       | C           | 1.75506410  | -0.08734238 | -0.91061997                      | 1498.6533, 1502.3740, 1503.7185,      |
| H     | 2.32194024  | -0.34960815 | -1.80546038 | 1509.2504, 1510.9047, 1522.3966, |                                       |
| H     | 0.91016895  | 0.51479416  | -1.25355030 | 1631.0207, 3031.1889, 3038.0747, |                                       |
| C     | 2.64324139  | 0.73902626  | 0.01452497  | 3051.1381, 3054.2266, 3061.4421, |                                       |
| H     | 3.52138627  | 0.16765497  | 0.31946035  | 3061.7544, 3071.2234, 3080.7338, |                                       |
| H     | 2.12238625  | 1.02792332  | 0.92979862  | 3087.7153, 3090.4844, 3099.9796, |                                       |
| H     | 2.99391868  | 1.64768078  | -0.47580739 | 3117.9828, 3124.2209, 3130.4967, |                                       |
| O     | -0.39992186 | 2.27129254  | 0.26728356  | 3139.7428, 3777.5300             |                                       |
| H     | 0.56849928  | 2.24050543  | 0.20379194  |                                  |                                       |
| SP3_8 | C           | -3.48866064 | -0.55971450 | -0.01966128                      |                                       |
|       | H           | -3.60459875 | 0.48081475  | -0.32421748                      | 478.5842i, 34.3109, 45.4907, 64.1474, |
|       | H           | -4.24292197 | -1.15241779 | -0.53543349                      | 90.8062, 94.4276, 112.6676, 137.7713, |
|       | H           | -3.68932402 | -0.62004285 | 1.05110885                       | 159.9857, 242.3862, 252.1158,         |
|       | C           | -1.01216968 | -0.23040116 | 0.36349870                       | 286.6644, 359.1426, 396.8294,         |
|       | H           | -1.14264044 | 0.84919453  | 0.00095452                       | 497.0882, 619.6389, 742.6952,         |

|        |   |             |             |             |                                       |
|--------|---|-------------|-------------|-------------|---------------------------------------|
|        | H | -1.18948589 | -0.19511709 | 1.44273490  | 775.7634, 784.9832, 861.9459,         |
|        | C | -2.08125976 | -1.04892594 | -0.33403223 | 889.8382, 926.6642, 954.2971,         |
|        | H | -1.97151733 | -2.09603384 | -0.03429001 | 986.1891, 1026.8202, 1055.4513,       |
|        | H | -1.90672731 | -1.01636444 | -1.41184733 | 1080.5666, 1100.8326, 1107.8667,      |
|        | C | 0.41771771  | -0.63033511 | 0.05869592  | 1164.0432, 1193.0241, 1219.1251,      |
|        | H | 0.56087274  | -0.62661246 | -1.02420663 | 1244.1518, 1266.9070, 1298.0314,      |
|        | H | 0.57571988  | -1.66372958 | 0.39014966  | 1309.6769, 1324.7832, 1336.8990,      |
|        | C | 1.44156757  | 0.28021198  | 0.72732368  | 1362.8852, 1378.2410, 1390.9784,      |
|        | H | 1.21667390  | 0.33677928  | 1.79615569  | 1405.0069, 1413.6104, 1416.2683,      |
|        | H | 1.32241862  | 1.29193414  | 0.32817732  | 1477.3432, 1487.2730, 1492.4748,      |
|        | C | 2.88776896  | -0.17262777 | 0.54355660  | 1498.7575, 1502.9671, 1506.2410,      |
|        | H | 3.54122739  | 0.49749772  | 1.10517297  | 1509.8306, 1513.4408, 1675.0193,      |
|        | H | 3.01224288  | -1.16536327 | 0.98447929  | 3021.5877, 3038.3286, 3040.4402,      |
|        | C | 3.33333582  | -0.20298596 | -0.91442749 | 3047.4184, 3052.3514, 3058.8976,      |
|        | H | 3.15952908  | 0.76346830  | -1.39083537 | 3059.6281, 3072.6024, 3081.7454,      |
|        | H | 2.78958213  | -0.95610639 | -1.48408692 | 3086.1123, 3095.9554, 3126.8352,      |
|        | H | 4.39518348  | -0.43199964 | -0.99711419 | 3127.0613, 3134.9513, 3136.4816,      |
|        | O | -1.31403520 | 2.30674652  | -0.37318333 | 3783.4540                             |
|        | H | -1.30375259 | 2.63879724  | 0.53884151  |                                       |
|        | C | -2.91536984 | -0.83497468 | -0.86072789 |                                       |
|        | H | -2.26017955 | -1.50753070 | -1.41330053 | 484.6652i, 44.9254, 47.9850, 59.1336, |
|        | H | -3.92765134 | -1.23114632 | -0.92812671 | 76.0130, 93.2260, 124.6783, 136.2514, |
|        | H | -2.89620172 | 0.13685727  | -1.35628703 | 149.9285, 242.8740, 245.3689,         |
|        | C | -1.13205665 | -0.00873227 | 0.75395173  | 287.5360, 359.3876, 398.1964,         |
|        | H | -1.24069853 | 1.02678919  | 0.27732722  | 490.1291, 647.3367, 730.5462,         |
|        | H | -0.91031695 | 0.17493346  | 1.80817749  | 769.5914, 776.0789, 852.5780,         |
|        | C | -2.47813722 | -0.69606354 | 0.59314237  | 893.1820, 922.2911, 953.9005,         |
|        | H | -3.22997244 | -0.13097268 | 1.14618928  | 988.4096, 1023.8173, 1052.2840,       |
|        | H | -2.42487780 | -1.68392178 | 1.06209694  | 1080.8616, 1095.9704, 1107.7043,      |
|        | C | 0.04471823  | -0.67984656 | 0.07147990  | 1161.5169, 1193.7501, 1220.7100,      |
|        | H | -0.13278773 | -0.72940130 | -1.00526390 | 1253.2946, 1258.9884, 1302.8190,      |
|        | H | 0.11479521  | -1.71605994 | 0.42344881  | 1316.2335, 1332.5640, 1337.2417,      |
|        | C | 1.36374948  | 0.03725995  | 0.32630782  | 1363.4177, 1376.3428, 1394.3984,      |
|        | H | 1.55142473  | 0.08259901  | 1.40398722  | 1408.5887, 1413.4057, 1416.7625,      |
|        | H | 1.27564681  | 1.07209588  | -0.01901499 | 1479.3965, 1484.8751, 1489.9072,      |
|        | C | 2.55034531  | -0.62415365 | -0.36269262 | 1500.0229, 1503.0470, 1504.1601,      |
|        | H | 2.63050740  | -1.66051392 | -0.02432832 | 1511.4875, 1512.7770, 1677.5851,      |
|        | H | 2.36083827  | -0.66571097 | -1.43816683 | 3022.4380, 3031.6840, 3038.3184,      |
|        | C | 3.86050297  | 0.10625926  | -0.09914127 | 3048.5315, 3057.2909, 3061.1462,      |
|        | H | 4.07890720  | 0.13727411  | 0.96934033  | 3063.3911, 3068.2952, 3082.4706,      |
|        | H | 3.80752074  | 1.13588683  | -0.45559975 | 3089.2100, 3094.9587, 3123.5798,      |
|        | H | 4.69906962  | -0.37811928 | -0.59809120 | 3132.2577, 3133.0789, 3138.2252,      |
|        | O | -1.29570042 | 2.40923683  | -0.34923386 | 3781.7731                             |
|        | H | -0.89293433 | 2.86455534  | 0.40756261  |                                       |
|        | C | 2.66471327  | 0.08299356  | 0.97394027  |                                       |
|        | H | 2.29287225  | -0.60637013 | 1.73187331  | 602.5361i, 43.8998, 78.9614, 93.9829, |
|        | H | 3.74356761  | 0.16168882  | 1.10062644  | 112.0721, 135.5674, 147.3915,         |
|        | H | 2.22687437  | 1.06457756  | 1.16115531  | 212.2024, 246.8359, 256.5458,         |
|        | C | 0.81864083  | -0.37887787 | -0.71080589 | 282.6620, 309.5110, 364.4423,         |
|        | H | 0.51216472  | 0.73029944  | -0.65996486 | 446.4784, 514.7019, 671.3578,         |
|        | H | 0.60894774  | -0.65799226 | -1.74692273 | 725.3377, 762.2404, 800.6923,         |
|        | C | 2.31212412  | -0.38855668 | -0.43209012 | 839.5725, 854.6148, 912.1160,         |
|        | H | 2.80862432  | 0.24829416  | -1.16558649 | 945.0831, 961.3193, 1010.6581,        |
|        | H | 2.69102078  | -1.40351186 | -0.59034214 | 1041.1834, 1063.0571, 1093.7640,      |
|        | C | -0.02633259 | -1.19783683 | 0.24905537  | 1112.3699, 1150.1233, 1156.0406,      |
|        | H | 0.00180075  | -0.75002711 | 1.24435401  | 1183.2880, 1244.9352, 1266.0855,      |
|        | H | 0.43943136  | -2.18376860 | 0.35387306  | 1296.5127, 1313.5749, 1322.9396,      |
|        | C | -1.47307991 | -1.38218937 | -0.20637109 | 1347.1420, 1363.5035, 1379.9734,      |
| SP3_9  |   |             |             |             |                                       |
| SP3_10 |   |             |             |             |                                       |

|        |   |             |             |             |                                       |
|--------|---|-------------|-------------|-------------|---------------------------------------|
|        | H | -1.99988269 | -2.00429579 | 0.52190018  | 1392.1846, 1406.2565, 1412.5486,      |
|        | H | -1.47626176 | -1.93508964 | -1.14901704 | 1416.4378, 1479.8216, 1483.3448,      |
|        | C | -2.24589244 | -0.07748802 | -0.39451378 | 1492.9093, 1502.8235, 1505.3702,      |
|        | H | -1.76626522 | 0.52071862  | -1.17339458 | 1509.1995, 1511.2718, 1521.9695,      |
|        | H | -3.24438544 | -0.31004605 | -0.76819707 | 1635.4262, 3033.1989, 3038.6039,      |
|        | C | -2.37357725 | 0.73436602  | 0.89091920  | 3047.2322, 3052.4349, 3057.9771,      |
|        | H | -1.39923888 | 1.00007605  | 1.30599075  | 3061.4251, 3066.1238, 3080.3180,      |
|        | H | -2.89795068 | 0.16144379  | 1.65728295  | 3089.0024, 3092.3368, 3098.2109,      |
|        | H | -2.93304130 | 1.65586249  | 0.72692452  | 3118.1154, 3123.8508, 3131.9131,      |
|        | O | 0.35932615  | 2.21937569  | -0.57010370 | 3136.8100, 3776.6719                  |
|        | H | -0.54246325 | 2.19867019  | -0.21052976 |                                       |
|        | C | -3.21396034 | -0.81820994 | -0.59774855 | 481.3268i, 39.2270, 51.0267, 68.0554, |
|        | H | -3.38372559 | 0.20686769  | -0.92998700 | 75.6761, 90.9852, 102.7859, 122.9099, |
|        | H | -3.59451940 | -1.48847611 | -1.36727052 | 210.2454, 243.0715, 248.2000,         |
|        | H | -3.79907567 | -0.98089979 | 0.30872582  | 266.1526, 314.6427, 409.1911,         |
|        | C | -1.18644684 | -0.11972793 | 0.73284044  | 505.7897, 652.5257, 730.1888,         |
|        | H | -1.28387494 | 0.94439870  | 0.32122917  | 763.1415, 782.1267, 861.9330,         |
|        | H | -1.82077493 | -0.14819173 | 1.62248211  | 881.9764, 917.9868, 939.8940,         |
|        | C | -1.73158313 | -1.04812033 | -0.33670235 | 988.9096, 1038.7846, 1057.2397,       |
|        | H | -1.55995748 | -2.08318182 | -0.02261395 | 1072.8550, 1096.2656, 1111.1647,      |
|        | H | -1.17191596 | -0.90703166 | -1.26252046 | 1161.9968, 1189.7791, 1216.4007,      |
|        | C | 0.27537211  | -0.30766320 | 1.10094058  | 1259.5011, 1280.4070, 1297.9598,      |
|        | H | 0.40728274  | -1.30765890 | 1.52994407  | 1306.7456, 1326.0506, 1336.5872,      |
|        | H | 0.53747271  | 0.40242304  | 1.88903058  | 1367.6555, 1376.0398, 1400.1912,      |
|        | C | 1.23687550  | -0.12664721 | -0.06841519 | 1409.2714, 1410.5854, 1411.9348,      |
|        | H | 1.02106286  | 0.82586535  | -0.56255334 | 1478.2136, 1484.4770, 1489.7056,      |
|        | H | 1.07037205  | -0.90868541 | -0.81373229 | 1500.3242, 1502.2858, 1502.7107,      |
|        | C | 2.69792590  | -0.15865230 | 0.36208164  | 1508.5180, 1513.1357, 1682.6649,      |
|        | H | 2.87287909  | 0.63527086  | 1.09254158  | 3024.5532, 3036.1459, 3039.0120,      |
|        | H | 2.90013550  | -1.10108542 | 0.87827102  | 3048.8823, 3057.3656, 3057.8176,      |
|        | C | 3.65596410  | 0.00175017  | -0.81088149 | 3062.8001, 3068.8192, 3076.2338,      |
|        | H | 3.48197305  | 0.94806107  | -1.32474945 | 3091.8450, 3098.9379, 3124.1861,      |
|        | H | 3.51591351  | -0.79931459 | -1.53809414 | 3126.0357, 3132.4523, 3134.9966,      |
|        | H | 4.69596555  | -0.01803709 | -0.48698009 | 3780.5371                             |
|        | O | -1.50458465 | 2.33684824  | -0.24460664 |                                       |
|        | H | -2.25741986 | 2.54851435  | 0.33043957  |                                       |
| SP3_11 | C | 2.87478508  | -0.13976867 | 1.05362318  | 554.0777i, 50.4451, 72.7417, 97.9204, |
|        | H | 2.76742539  | 0.94503668  | 1.07564091  | 108.0273, 134.0086, 191.9873,         |
|        | H | 3.18154454  | -0.47365175 | 2.04390372  | 193.8161, 206.8213, 253.4819,         |
|        | H | 3.67524836  | -0.38145560 | 0.35330878  | 261.9260, 289.6244, 316.3104,         |
|        | C | 1.11315390  | -0.31262033 | -0.74188849 | 424.4362, 526.6085, 664.5445,         |
|        | H | 0.97054544  | 0.82592139  | -0.66318813 | 747.9830, 762.6791, 801.3306,         |
|        | H | 1.92907720  | -0.39098445 | -1.46435422 | 845.6207, 882.8670, 890.7995,         |
|        | C | 1.56625065  | -0.79020084 | 0.62464709  | 945.0462, 974.0032, 1048.9300,        |
|        | H | 1.67466507  | -1.88009236 | 0.59795974  | 1058.0339, 1068.2877, 1074.0265,      |
|        | H | 0.79196835  | -0.57787806 | 1.36514127  | 1129.5699, 1163.0724, 1175.4463,      |
|        | C | -0.14227586 | -0.96761555 | -1.29808404 | 1227.7635, 1241.0224, 1263.0007,      |
|        | H | 0.11412715  | -1.99004806 | -1.59291141 | 1289.9676, 1305.1699, 1314.9088,      |
|        | H | -0.43555830 | -0.45135780 | -2.21612425 | 1326.8427, 1339.1090, 1384.0880,      |
|        | C | -1.33396192 | -1.01967378 | -0.34441897 | 1394.1398, 1409.4562, 1414.1164,      |
|        | H | -1.08844559 | -1.63703245 | 0.52391908  | 1414.7248, 1479.0677, 1483.7846,      |
|        | H | -2.16259347 | -1.52371817 | -0.84819654 | 1496.4862, 1501.5519, 1503.4733,      |
|        | C | -1.81000167 | 0.34588154  | 0.13765373  | 1504.5825, 1509.4892, 1521.8456,      |
|        | H | -1.01735772 | 0.82861676  | 0.71473580  | 1633.3889, 3024.0668, 3032.3087,      |
|        | H | -2.00505827 | 0.98198187  | -0.73315952 | 3035.9627, 3049.4737, 3058.4576,      |
|        | C | -3.06860096 | 0.25090343  | 0.99059125  | 3061.2858, 3067.7996, 3070.6318,      |
|        | H | -2.89077278 | -0.37289547 | 1.86765581  | 3076.2695, 3085.2296, 3093.3594,      |
|        | H | -3.88679006 | -0.19790610 | 0.42603281  | 3124.8533, 3129.8944, 3134.4813,      |
| SP3_12 |   |             |             |             |                                       |

|        |             |             |             |             |                                                                                                                                                                                                                                                                                                                                                                                                                                                                                                                                                                                                                                                                                                                                                            |
|--------|-------------|-------------|-------------|-------------|------------------------------------------------------------------------------------------------------------------------------------------------------------------------------------------------------------------------------------------------------------------------------------------------------------------------------------------------------------------------------------------------------------------------------------------------------------------------------------------------------------------------------------------------------------------------------------------------------------------------------------------------------------------------------------------------------------------------------------------------------------|
|        | H           | -3.39597649 | 1.23014222  | 1.33752709  | 3138.3749, 3782.8904                                                                                                                                                                                                                                                                                                                                                                                                                                                                                                                                                                                                                                                                                                                                       |
|        | O           | 0.83860469  | 2.31864571  | -0.58011388 |                                                                                                                                                                                                                                                                                                                                                                                                                                                                                                                                                                                                                                                                                                                                                            |
|        | H           | -0.12698168 | 2.31472078  | -0.67972240 |                                                                                                                                                                                                                                                                                                                                                                                                                                                                                                                                                                                                                                                                                                                                                            |
| SP3_13 | C           | -2.93990899 | -0.64603019 | -0.88993187 | 610.8792i, 50.8220, 64.1682, 68.6931, 92.7096, 110.2468, 126.0377, 148.8832, 162.3191, 243.5343, 251.9394, 279.6752, 357.6208, 396.2171, 495.4067, 642.7993, 734.9349, 767.9999, 789.7076, 851.0065, 887.2225, 921.4860, 942.0298, 987.4042, 1027.9689, 1052.1423, 1083.0823, 1096.4880, 1109.3944, 1160.8563, 1172.1999, 1217.6839, 1255.0794, 1258.1408, 1298.1774, 1317.2470, 1333.0572, 1335.3376, 1366.3167, 1387.5241, 1407.4120, 1411.5089, 1415.4840, 1416.8066, 1483.9310, 1485.2158, 1490.7665, 1502.1198, 1504.3812, 1506.2838, 1509.7256, 1514.5442, 1653.3464, 3023.2551, 3036.8987, 3038.2447, 3048.2978, 3053.9025, 3058.4518, 3061.8264, 3067.0774, 3077.2542, 3091.0396, 3092.7050, 3125.4280, 3129.9697, 3132.0656, 3137.1397, 3778.2625 |
|        | H           | -2.27872339 | -1.18894600 | -1.56494635 |                                                                                                                                                                                                                                                                                                                                                                                                                                                                                                                                                                                                                                                                                                                                                            |
|        | H           | -3.94058560 | -1.05960647 | -1.00721637 |                                                                                                                                                                                                                                                                                                                                                                                                                                                                                                                                                                                                                                                                                                                                                            |
|        | H           | -2.97028400 | 0.39812175  | -1.20605824 |                                                                                                                                                                                                                                                                                                                                                                                                                                                                                                                                                                                                                                                                                                                                                            |
|        | C           | -1.12278946 | -0.09852398 | 0.81191906  |                                                                                                                                                                                                                                                                                                                                                                                                                                                                                                                                                                                                                                                                                                                                                            |
|        | H           | -1.22547808 | 1.02231613  | 0.57080024  |                                                                                                                                                                                                                                                                                                                                                                                                                                                                                                                                                                                                                                                                                                                                                            |
|        | H           | -0.88093264 | -0.10360732 | 1.87769662  |                                                                                                                                                                                                                                                                                                                                                                                                                                                                                                                                                                                                                                                                                                                                                            |
|        | C           | -2.47263695 | -0.74725998 | 0.55739244  |                                                                                                                                                                                                                                                                                                                                                                                                                                                                                                                                                                                                                                                                                                                                                            |
|        | H           | -3.21441661 | -0.28623490 | 1.21092091  |                                                                                                                                                                                                                                                                                                                                                                                                                                                                                                                                                                                                                                                                                                                                                            |
|        | H           | -2.41165590 | -1.80023390 | 0.85117759  |                                                                                                                                                                                                                                                                                                                                                                                                                                                                                                                                                                                                                                                                                                                                                            |
|        | C           | 0.03932992  | -0.64541015 | 0.00389096  |                                                                                                                                                                                                                                                                                                                                                                                                                                                                                                                                                                                                                                                                                                                                                            |
|        | H           | -0.14368645 | -0.49638098 | -1.06455433 |                                                                                                                                                                                                                                                                                                                                                                                                                                                                                                                                                                                                                                                                                                                                                            |
|        | H           | 0.09414276  | -1.73052943 | 0.15061897  |                                                                                                                                                                                                                                                                                                                                                                                                                                                                                                                                                                                                                                                                                                                                                            |
|        | C           | 1.37353693  | -0.01204011 | 0.37792600  |                                                                                                                                                                                                                                                                                                                                                                                                                                                                                                                                                                                                                                                                                                                                                            |
|        | H           | 1.57693230  | -0.19985431 | 1.43659588  |                                                                                                                                                                                                                                                                                                                                                                                                                                                                                                                                                                                                                                                                                                                                                            |
|        | H           | 1.29798070  | 1.07449188  | 0.27127650  |                                                                                                                                                                                                                                                                                                                                                                                                                                                                                                                                                                                                                                                                                                                                                            |
|        | C           | 2.53793903  | -0.52788904 | -0.45761103 |                                                                                                                                                                                                                                                                                                                                                                                                                                                                                                                                                                                                                                                                                                                                                            |
|        | H           | 2.60170644  | -1.61423371 | -0.35358893 |                                                                                                                                                                                                                                                                                                                                                                                                                                                                                                                                                                                                                                                                                                                                                            |
| H      | 2.33584310  | -0.33298728 | -1.51420387 |             |                                                                                                                                                                                                                                                                                                                                                                                                                                                                                                                                                                                                                                                                                                                                                            |
| C      | 3.86546222  | 0.10589713  | -0.06321147 |             |                                                                                                                                                                                                                                                                                                                                                                                                                                                                                                                                                                                                                                                                                                                                                            |
| H      | 4.09819101  | -0.10234191 | 0.98197844  |             |                                                                                                                                                                                                                                                                                                                                                                                                                                                                                                                                                                                                                                                                                                                                                            |
| H      | 3.82766179  | 1.18945768  | -0.18289477 |             |                                                                                                                                                                                                                                                                                                                                                                                                                                                                                                                                                                                                                                                                                                                                                            |
| H      | 4.68750168  | -0.27051746 | -0.67091404 |             |                                                                                                                                                                                                                                                                                                                                                                                                                                                                                                                                                                                                                                                                                                                                                            |
| O      | -1.27087621 | 2.36108199  | -0.10695925 |             |                                                                                                                                                                                                                                                                                                                                                                                                                                                                                                                                                                                                                                                                                                                                                            |
| H      | -0.97278365 | 2.03996825  | -0.97325875 |             |                                                                                                                                                                                                                                                                                                                                                                                                                                                                                                                                                                                                                                                                                                                                                            |
| SP3_14 | C           | 2.85303637  | 1.58617644  | 0.06412975  | 467.0786i, 43.7007, 57.7347, 68.9116, 83.1614, 92.4381, 105.4022, 128.0964, 212.7133, 242.2646, 252.6737, 284.4825, 308.5770, 407.3495, 512.3131, 630.1536, 732.1863, 767.0546, 783.9881, 868.1449, 892.6421, 919.4175, 944.7446, 994.0224, 1039.0084, 1056.3958, 1073.8937, 1093.9043, 1111.2196, 1159.9023, 1194.9495, 1223.0491, 1243.6892, 1290.5721, 1296.2245, 1309.0924, 1329.1494, 1333.9295, 1339.1317, 1369.7719, 1393.7502, 1403.7463, 1410.8613, 1413.6261, 1484.0171, 1487.0997, 1491.5971, 1501.8600, 1503.0543, 1503.6281, 1511.0952, 1514.1922, 1683.1748, 3033.1473, 3045.4384, 3046.5463, 3051.6532, 3056.0095, 3057.0404, 3057.5918, 3066.3658, 3081.4520, 3086.8096, 3099.9258, 3123.9127, 3124.4897, 3132.1342, 3136.4927, 3783.7127  |
|        | H           | 3.58490041  | 0.83610865  | -0.23721469 |                                                                                                                                                                                                                                                                                                                                                                                                                                                                                                                                                                                                                                                                                                                                                            |
|        | H           | 3.12927426  | 2.53360274  | -0.39665168 |                                                                                                                                                                                                                                                                                                                                                                                                                                                                                                                                                                                                                                                                                                                                                            |
|        | H           | 2.92032330  | 1.70923227  | 1.14658137  |                                                                                                                                                                                                                                                                                                                                                                                                                                                                                                                                                                                                                                                                                                                                                            |
|        | C           | 1.03052202  | -0.14593334 | 0.32044872  |                                                                                                                                                                                                                                                                                                                                                                                                                                                                                                                                                                                                                                                                                                                                                            |
|        | H           | 1.83734056  | -0.92260071 | 0.07758468  |                                                                                                                                                                                                                                                                                                                                                                                                                                                                                                                                                                                                                                                                                                                                                            |
|        | H           | 1.04636129  | -0.04460464 | 1.40991622  |                                                                                                                                                                                                                                                                                                                                                                                                                                                                                                                                                                                                                                                                                                                                                            |
|        | C           | 1.45079784  | 1.15264419  | -0.34297888 |                                                                                                                                                                                                                                                                                                                                                                                                                                                                                                                                                                                                                                                                                                                                                            |
|        | H           | 0.73475937  | 1.93618587  | -0.08018889 |                                                                                                                                                                                                                                                                                                                                                                                                                                                                                                                                                                                                                                                                                                                                                            |
|        | H           | 1.39675413  | 1.03207699  | -1.42783088 |                                                                                                                                                                                                                                                                                                                                                                                                                                                                                                                                                                                                                                                                                                                                                            |
|        | C           | -0.28865744 | -0.73293668 | -0.14982298 |                                                                                                                                                                                                                                                                                                                                                                                                                                                                                                                                                                                                                                                                                                                                                            |
|        | H           | -0.42914223 | -1.71401943 | 0.30970482  |                                                                                                                                                                                                                                                                                                                                                                                                                                                                                                                                                                                                                                                                                                                                                            |
|        | H           | -0.24420875 | -0.89880097 | -1.22984743 |                                                                                                                                                                                                                                                                                                                                                                                                                                                                                                                                                                                                                                                                                                                                                            |
|        | C           | -1.49477214 | 0.14620351  | 0.17591631  |                                                                                                                                                                                                                                                                                                                                                                                                                                                                                                                                                                                                                                                                                                                                                            |
|        | H           | -1.40957314 | 1.10242585  | -0.34689204 |                                                                                                                                                                                                                                                                                                                                                                                                                                                                                                                                                                                                                                                                                                                                                            |
|        | H           | -1.49704776 | 0.37800517  | 1.24607898  |                                                                                                                                                                                                                                                                                                                                                                                                                                                                                                                                                                                                                                                                                                                                                            |
|        | C           | -2.81749136 | -0.50947506 | -0.20140603 |                                                                                                                                                                                                                                                                                                                                                                                                                                                                                                                                                                                                                                                                                                                                                            |
|        | H           | -2.80352510 | -0.75425907 | -1.26651024 |                                                                                                                                                                                                                                                                                                                                                                                                                                                                                                                                                                                                                                                                                                                                                            |
| H      | -2.91085924 | -1.45958239 | 0.33044366  |             |                                                                                                                                                                                                                                                                                                                                                                                                                                                                                                                                                                                                                                                                                                                                                            |
| C      | -4.01761208 | 0.37546754  | 0.10864860  |             |                                                                                                                                                                                                                                                                                                                                                                                                                                                                                                                                                                                                                                                                                                                                                            |
| H      | -3.95545434 | 1.31817334  | -0.43679563 |             |                                                                                                                                                                                                                                                                                                                                                                                                                                                                                                                                                                                                                                                                                                                                                            |
| H      | -4.06010863 | 0.61190750  | 1.17282541  |             |                                                                                                                                                                                                                                                                                                                                                                                                                                                                                                                                                                                                                                                                                                                                                            |
| H      | -4.95476000 | -0.10820992 | -0.16449707 |             |                                                                                                                                                                                                                                                                                                                                                                                                                                                                                                                                                                                                                                                                                                                                                            |
| O      | 2.98737338  | -1.88934717 | -0.08860368 |             |                                                                                                                                                                                                                                                                                                                                                                                                                                                                                                                                                                                                                                                                                                                                                            |
| H      | 3.42103948  | -1.67374347 | 0.75250996  |             |                                                                                                                                                                                                                                                                                                                                                                                                                                                                                                                                                                                                                                                                                                                                                            |
| SP3_15 | C           | -2.91647093 | -1.57518868 | 0.02179048  | 634.6607i, 45.7049, 58.7443, 66.5676, 86.1275, 94.5253, 123.1841, 132.0043, 185.9355, 240.2242, 247.6494, 277.9249, 302.4222, 402.3404,                                                                                                                                                                                                                                                                                                                                                                                                                                                                                                                                                                                                                    |
|        | H           | -3.64069190 | -0.76893228 | -0.09518990 |                                                                                                                                                                                                                                                                                                                                                                                                                                                                                                                                                                                                                                                                                                                                                            |
|        | H           | -3.23772418 | -2.41637130 | -0.59092321 |                                                                                                                                                                                                                                                                                                                                                                                                                                                                                                                                                                                                                                                                                                                                                            |
|        | H           | -2.93466907 | -1.89339048 | 1.06512230  |                                                                                                                                                                                                                                                                                                                                                                                                                                                                                                                                                                                                                                                                                                                                                            |
|        | C           | -1.05914365 | 0.07227516  | 0.47443424  |                                                                                                                                                                                                                                                                                                                                                                                                                                                                                                                                                                                                                                                                                                                                                            |

|        |   |             |             |             |                                       |
|--------|---|-------------|-------------|-------------|---------------------------------------|
|        | H | -1.88959491 | 0.86294223  | 0.41537292  | 506.1095, 649.9750, 730.0955,         |
|        | H | -1.03398289 | -0.19559138 | 1.53509059  | 745.5307, 786.9604, 854.2605,         |
|        | C | -1.52480126 | -1.09725754 | -0.37190403 | 872.5813, 914.6800, 944.4597,         |
|        | H | -0.81055855 | -1.91971780 | -0.27604890 | 1005.5038, 1040.6647, 1054.8255,      |
|        | H | -1.51685530 | -0.79778132 | -1.42346513 | 1075.6766, 1087.5928, 1113.4931,      |
|        | C | 0.24598901  | 0.71783532  | 0.04406643  | 1146.9459, 1190.4297, 1235.0924,      |
|        | H | 0.41971909  | 1.61705588  | 0.64130335  | 1249.5142, 1288.0217, 1296.8715,      |
|        | H | 0.16234708  | 1.04225378  | -0.99884030 | 1311.3793, 1330.9585, 1338.6761,      |
|        | C | 1.45650000  | -0.20347815 | 0.17912229  | 1368.8430, 1386.7041, 1400.4819,      |
|        | H | 1.33587549  | -1.07090345 | -0.47475863 | 1406.0588, 1411.9175, 1413.2547,      |
|        | H | 1.50239923  | -0.59107305 | 1.20189311  | 1483.1639, 1485.1133, 1490.4019,      |
|        | C | 2.76888975  | 0.49393224  | -0.15668735 | 1501.0287, 1502.4130, 1503.5954,      |
|        | H | 2.71229561  | 0.89239399  | -1.17301171 | 1510.3522, 1513.1546, 1703.4931,      |
|        | H | 2.89683985  | 1.35491215  | 0.50423751  | 3027.9623, 3038.3334, 3043.2802,      |
|        | C | 3.97079558  | -0.43330733 | -0.03344690 | 3049.7217, 3056.7164, 3058.0894,      |
|        | H | 3.87355340  | -1.28558218 | -0.70732193 | 3060.9834, 3063.8023, 3075.8389,      |
|        | H | 4.05664271  | -0.82298164 | 0.98182504  | 3083.0864, 3095.9785, 3124.6847,      |
|        | H | 4.90074284  | 0.08009671  | -0.27485058 | 3129.1264, 3132.9039, 3138.9942,      |
|        | O | -2.79400995 | 1.95453360  | -0.08841838 | 3782.3884                             |
|        | H | -2.09480993 | 2.42753514  | -0.56733841 |                                       |
|        | C | -2.99903886 | -1.55254508 | 0.15292806  |                                       |
|        | H | -2.96269984 | -1.69415458 | 1.23435113  | 472.1500i, 46.8913, 59.0653, 65.8896, |
|        | H | -4.01323411 | -1.76965093 | -0.18009110 | 69.8198, 96.3013, 120.3110, 138.8749, |
|        | H | -2.33565960 | -2.28685999 | -0.30289051 | 158.7777, 240.0529, 250.5398,         |
|        | C | -1.22690503 | 0.25609989  | 0.31682541  | 294.1599, 355.0762, 398.0342,         |
|        | H | -1.06450174 | 1.35536982  | 0.03503813  | 494.1350, 629.0745, 735.2482,         |
|        | H | -1.21908086 | 0.23390213  | 1.41080293  | 767.8433, 781.0315, 866.6516,         |
|        | C | -2.59509809 | -0.12780102 | -0.22100620 | 893.9101, 922.4402, 966.2864,         |
|        | H | -2.59418033 | -0.01830602 | -1.30778342 | 985.7115, 1028.3644, 1052.2480,       |
|        | H | -3.33719423 | 0.57368307  | 0.16265989  | 1080.9039, 1095.8990, 1111.4649,      |
|        | C | -0.05456778 | -0.52633267 | -0.24372710 | 1161.3005, 1195.2920, 1221.6641,      |
|        | H | -0.10144307 | -0.51123214 | -1.33684875 | 1248.7906, 1268.5433, 1296.9726,      |
|        | H | -0.14365980 | -1.57553997 | 0.05656937  | 1322.9280, 1323.7278, 1338.0508,      |
|        | C | 1.29536780  | 0.00901306  | 0.21639152  | 1344.8824, 1367.2715, 1393.3489,      |
|        | H | 1.32646310  | 0.01897736  | 1.31114381  | 1406.1996, 1409.8973, 1413.5430,      |
|        | H | 1.39456753  | 1.04886307  | -0.10874287 | 1481.2721, 1491.2812, 1491.5179,      |
|        | C | 2.47346176  | -0.79991971 | -0.31093139 | 1501.5225, 1502.7944, 1503.7699,      |
|        | H | 2.37094110  | -1.83860792 | 0.01379833  | 1510.8559, 1514.0136, 1671.4782,      |
|        | H | 2.43590340  | -0.81420840 | -1.40311080 | 3028.3461, 3034.8843, 3048.7906,      |
|        | C | 3.81526969  | -0.24640294 | 0.15019699  | 3051.9317, 3057.2475, 3059.9054,      |
|        | H | 3.88076865  | -0.24628975 | 1.23925934  | 3060.8147, 3064.8242, 3075.9905,      |
|        | H | 3.94656572  | 0.78203031  | -0.18894870 | 3091.6154, 3099.4117, 3124.0069,      |
|        | H | 4.64722812  | -0.83488933 | -0.23489100 | 3129.4228, 3131.7057, 3137.9881,      |
|        | O | -0.77011294 | 2.81872883  | -0.17932938 | 3783.7788                             |
|        | H | -0.32081746 | 2.95441342  | 0.67025548  |                                       |
|        | C | -2.51324118 | -1.38316280 | -0.54100788 |                                       |
|        | H | -3.34347186 | -1.17074685 | 0.13468889  | 477.8107i, 38.5935, 62.6107, 82.6278, |
|        | H | -2.92652924 | -1.78000345 | -1.46739877 | 107.4430, 119.0176, 140.8231,         |
|        | H | -1.90587846 | -2.16532018 | -0.08508723 | 192.6900, 214.6382, 255.0429,         |
|        | C | -1.18294757 | 0.51591336  | 0.47972232  | 286.9522, 306.0119, 369.2655,         |
|        | H | -0.58060801 | 1.44322123  | 0.18039967  | 432.6747, 510.8183, 633.9409,         |
|        | H | -2.01885678 | 0.89785836  | 1.07115814  | 743.3477, 767.3951, 806.0330,         |
|        | C | -1.69009308 | -0.12394742 | -0.80278477 | 841.9154, 882.1112, 907.2366,         |
|        | H | -0.84628420 | -0.36388058 | -1.45275813 | 949.0813, 962.8848, 1026.5608,        |
|        | H | -2.29563756 | 0.60426202  | -1.34451343 | 1052.2667, 1061.4459, 1071.9560,      |
|        | C | -0.28199088 | -0.35114078 | 1.34988929  | 1116.5262, 1162.0714, 1169.0840,      |
|        | H | -0.89143466 | -1.13390097 | 1.81157611  | 1200.1765, 1249.5048, 1266.1398,      |
|        | H | 0.10164429  | 0.25968023  | 2.17060078  | 1290.8767, 1316.2192, 1329.9728,      |
| SP3_16 |   |             |             |             |                                       |
| SP3_17 |   |             |             |             |                                       |



|        |            |             |             |                                  |                                       |
|--------|------------|-------------|-------------|----------------------------------|---------------------------------------|
|        | C          | 0.88972697  | -0.99165683 | 0.61032188                       | 1341.9247, 1353.5733, 1374.7930,      |
|        | H          | 0.51800441  | -1.69018140 | -0.14577229                      | 1392.7745, 1408.0653, 1411.5426,      |
|        | H          | 1.46324133  | -1.59435374 | 1.31938952                       | 1414.1840, 1477.2795, 1485.1666,      |
|        | C          | 1.82235375  | 0.01608221  | -0.05314579                      | 1494.4202, 1500.8227, 1503.8851,      |
|        | H          | 1.28146411  | 0.57935406  | -0.81614397                      | 1504.5599, 1511.7220, 1513.8809,      |
|        | H          | 2.14070335  | 0.75287519  | 0.68902470                       | 1731.8069, 3037.8914, 3042.2504,      |
|        | C          | 3.03817680  | -0.65468412 | -0.67864460                      | 3052.7700, 3057.9999, 3058.5036,      |
|        | H          | 2.73401899  | -1.37979524 | -1.43550505                      | 3065.1201, 3068.5875, 3070.3370,      |
|        | H          | 3.61922966  | -1.18918120 | 0.07452804                       | 3082.5100, 3095.1166, 3099.3505,      |
|        | H          | 3.69489181  | 0.07117994  | -1.15660026                      | 3120.6527, 3127.3542, 3131.7872,      |
|        | O          | -0.04909478 | 2.79916229  | -0.21944831                      | 3136.1063, 3786.1600                  |
|        | H          | -0.84364772 | 3.30121250  | 0.02189701                       |                                       |
| SP3_18 | C          | -2.96087823 | -0.47235445 | -0.27410513                      | 598.2750i, 53.5430, 71.3843, 99.4230, |
|        | H          | -3.49912332 | -0.19458965 | 0.63353506                       | 109.0496, 123.7803, 160.9443,         |
|        | H          | -3.66757291 | -0.45469930 | -1.10281228                      | 211.2506, 240.0527, 274.6429,         |
|        | H          | -2.61477121 | -1.49937743 | -0.15381461                      | 326.9750, 337.9688, 390.3827,         |
|        | C          | -0.84343242 | 0.56254167  | 0.65363448                       | 433.4550, 527.6854, 669.7196,         |
|        | H          | -0.05453215 | 1.35792609  | 0.37814731                       | 727.3982, 760.7778, 806.6208,         |
|        | H          | -1.34044228 | 1.01364579  | 1.51553424                       | 833.1850, 880.3496, 889.4631,         |
|        | C          | -1.79605742 | 0.48230364  | -0.52746775                      | 949.3138, 960.7852, 1002.5569,        |
|        | H          | -1.25281194 | 0.17080540  | -1.42200786                      | 1033.9408, 1056.8114, 1068.3585,      |
|        | H          | -2.17733597 | 1.48281630  | -0.73431511                      | 1097.7111, 1137.4362, 1164.3283,      |
|        | C          | -0.17119727 | -0.74047785 | 1.06165267                       | 1178.3746, 1227.5838, 1253.7331,      |
|        | H          | -0.92760980 | -1.38729690 | 1.51619294                       | 1292.9061, 1304.2290, 1332.7467,      |
|        | H          | 0.55100540  | -0.53617357 | 1.85441408                       | 1344.8823, 1369.4900, 1377.5581,      |
|        | C          | 0.50063229  | -1.50625208 | -0.07856326                      | 1396.5910, 1404.2973, 1408.7441,      |
|        | H          | -0.25960785 | -1.83229437 | -0.79216093                      | 1414.3968, 1479.0548, 1489.8580,      |
|        | H          | 0.94683420  | -2.41678074 | 0.32960556                       | 1501.3251, 1502.6585, 1503.7376,      |
|        | C          | 1.57591630  | -0.71645497 | -0.82294348                      | 1511.1958, 1513.7201, 1523.3310,      |
|        | H          | 1.96226520  | -1.32977664 | -1.63871275                      | 1639.1298, 3045.0852, 3050.1867,      |
|        | H          | 1.12652221  | 0.16229272  | -1.29151588                      | 3054.2229, 3058.7156, 3061.8539,      |
|        | C          | 2.73666284  | -0.29381865 | 0.07241545                       | 3067.9719, 3077.5287, 3080.9067,      |
| H      | 3.22633356 | -1.16623921 | 0.50805884  | 3089.6168, 3097.4190, 3103.7125, |                                       |
| H      | 2.40424472 | 0.32952190  | 0.90506437  | 3117.6770, 3123.5404, 3128.3112, |                                       |
| H      | 3.48921573 | 0.26300869  | -0.48667273 | 3135.4455, 3780.4198             |                                       |
| O      | 0.77727041 | 2.51416751  | -0.05747027 |                                  |                                       |
| H      | 1.61934660 | 2.03094704  | -0.06651595 |                                  |                                       |
| SP3_19 | C          | -2.20249682 | 1.95012316  | -0.07941526                      | 625.6510i, 46.2043, 67.8213, 69.3908, |
|        | H          | -3.13400086 | 1.39295042  | -0.17991757                      | 80.0951, 102.5913, 115.5365,          |
|        | H          | -2.39267491 | 2.82737286  | 0.53739930                       | 174.8296, 205.3475, 244.6676,         |
|        | H          | -1.90953244 | 2.29456164  | -1.07229463                      | 256.7559, 291.8898, 302.6334,         |
|        | C          | -0.83643934 | -0.15704242 | -0.32503168                      | 430.2833, 506.9549, 654.6542,         |
|        | H          | -1.84989051 | -0.66533324 | -0.50342715                      | 724.3642, 744.9597, 796.1876,         |
|        | H          | -0.51637030 | 0.12861789  | -1.33048683                      | 855.5710, 874.6040, 888.7598,         |
|        | C          | -1.11966400 | 1.06609614  | 0.52534283                       | 948.0973, 983.0378, 1046.1612,        |
|        | H          | -0.19670162 | 1.64168237  | 0.64652636                       | 1057.8998, 1066.5503, 1077.6322,      |
|        | H          | -1.41687297 | 0.74124013  | 1.52611638                       | 1122.7271, 1149.9682, 1178.6587,      |
|        | C          | 0.10226925  | -1.17949875 | 0.29500573                       | 1237.6864, 1249.5662, 1282.3530,      |
|        | H          | 0.22121699  | -2.02077982 | -0.39302563                      | 1302.9301, 1315.5991, 1328.6533,      |
|        | H          | -0.35748183 | -1.57451336 | 1.20576624                       | 1343.4385, 1374.3994, 1385.6314,      |
|        | C          | 1.48543700  | -0.62474686 | 0.64466095                       | 1405.2197, 1408.4868, 1413.2483,      |
|        | H          | 2.09273112  | -1.43415636 | 1.05778598                       | 1414.2308, 1482.0683, 1486.4600,      |
|        | H          | 1.39337755  | 0.12158949  | 1.43834515                       | 1492.2525, 1499.3120, 1503.1012,      |
|        | C          | 2.21961687  | -0.00806726 | -0.54022610                      | 1503.5606, 1510.3895, 1512.8221,      |
|        | H          | 2.24156168  | -0.72733942 | -1.36382638                      | 1693.5590, 3036.5716, 3038.1711,      |
|        | H          | 1.66511821  | 0.85959248  | -0.90544990                      | 3043.5174, 3052.0680, 3057.7903,      |
|        | C          | 3.63874532  | 0.41309735  | -0.18174077                      | 3060.3073, 3063.2895, 3069.2178,      |
| H      | 4.22613342 | -0.44444829 | 0.14910995  |                                  |                                       |

|        |             |             |             |                                  |                                       |
|--------|-------------|-------------|-------------|----------------------------------|---------------------------------------|
|        | H           | 3.63169578  | 1.14124379  | 0.63073961                       | 3076.7024, 3087.7520, 3094.4089,      |
|        | H           | 4.15139569  | 0.86384445  | -1.03062338                      | 3123.9321, 3128.3369, 3132.8738,      |
|        | O           | -3.11283734 | -1.46096544 | -0.31795555                      | 3138.5885, 3782.9199                  |
|        | H           | -2.67181592 | -2.21816974 | 0.09933267                       |                                       |
| SP3_20 | C           | -2.56607230 | -1.32531970 | -0.48474309                      | 542.6795i, 49.8416, 77.1927, 86.1381, |
|        | H           | -3.40498533 | -1.04722005 | 0.15508684                       | 113.3094, 115.6232, 172.9280,         |
|        | H           | -2.96874012 | -1.78274132 | -1.38759170                      | 181.8631, 213.9308, 256.2266,         |
|        | H           | -1.98408539 | -2.08240644 | 0.04163364                       | 288.9200, 303.2821, 358.6908,         |
|        | C           | -1.21295386 | 0.61150950  | 0.42203509                       | 424.2052, 533.7593, 658.5946,         |
|        | H           | -0.65468323 | 1.55421360  | 0.07455140                       | 757.2114, 762.6711, 799.8468,         |
|        | H           | -2.05015562 | 1.03098616  | 0.98466068                       | 837.0289, 883.6498, 887.3303,         |
|        | C           | -1.71460514 | -0.10268974 | -0.82175258                      | 948.2870, 958.3202, 1029.1810,        |
|        | H           | -0.86997191 | -0.40384948 | -1.44525071                      | 1052.0911, 1063.0517, 1075.2547,      |
|        | H           | -2.30014559 | 0.59906352  | -1.41667436                      | 1128.9586, 1155.3263, 1172.1773,      |
|        | C           | -0.32330206 | -0.20444627 | 1.35086294                       | 1210.1095, 1253.3298, 1266.3196,      |
|        | H           | -0.94980054 | -0.92522075 | 1.88433009                       | 1288.9656, 1294.4012, 1319.5296,      |
|        | H           | 0.08665003  | 0.45995773  | 2.11615965                       | 1336.7577, 1356.6731, 1379.8144,      |
|        | C           | 0.81773054  | -0.95574124 | 0.66868840                       | 1391.0805, 1407.3152, 1408.6256,      |
|        | H           | 0.41338921  | -1.69414405 | -0.02981827                      | 1413.6794, 1478.1630, 1485.5611,      |
|        | H           | 1.36382007  | -1.52468429 | 1.42537878                       | 1501.1596, 1501.6832, 1503.5308,      |
|        | C           | 1.80148503  | -0.06008330 | -0.07595446                      | 1504.2991, 1512.9105, 1521.4329,      |
|        | H           | 1.28417456  | 0.46252015  | -0.88448684                      | 1625.7178, 3022.5528, 3041.5353,      |
| H      | 2.17587858  | 0.70526340  | 0.61325730  | 3046.5193, 3058.0681, 3058.4705, |                                       |
| C      | 2.97483096  | -0.84318728 | -0.65085856 | 3065.1891, 3068.3766, 3076.9314, |                                       |
| H      | 2.62271095  | -1.60455197 | -1.34822028 | 3077.7335, 3090.8515, 3101.3615, |                                       |
| H      | 3.52769150  | -1.35027015 | 0.14085795  | 3124.5851, 3127.8041, 3134.1861, |                                       |
| H      | 3.66896489  | -0.19574505 | -1.18507619 | 3135.1744, 3783.8895             |                                       |
| O      | 0.05484654  | 2.82399692  | -0.26764179 |                                  |                                       |
| H      | 0.93783656  | 2.48660172  | -0.04733007 |                                  |                                       |
| SP3_21 | C           | -3.12081987 | -1.10874768 | -0.28322204                      | 484.4294i, 39.8561, 49.6384, 64.0362, |
|        | H           | -3.49689631 | -0.11498320 | -0.53014551                      | 80.5491, 114.2852, 122.3188,          |
|        | H           | -3.53567342 | -1.81359178 | -1.00249173                      | 130.5216, 234.0029, 244.2449,         |
|        | H           | -3.49753943 | -1.37667453 | 0.70513031                       | 263.3271, 290.6298, 313.6464,         |
|        | C           | -1.00505721 | -0.13763798 | 0.69231796                       | 415.9267, 528.2113, 655.9780,         |
|        | H           | -1.33213496 | 0.90735214  | 0.35755756                       | 747.2621, 765.3257, 785.0517,         |
|        | H           | -1.44982817 | -0.28163043 | 1.68030457                       | 854.2201, 880.8055, 905.6055,         |
|        | C           | -1.59842592 | -1.11559286 | -0.30494954                      | 946.7324, 966.5155, 1043.3464,        |
|        | H           | -1.22219326 | -2.11877518 | -0.07785663                      | 1046.7974, 1071.0972, 1091.7523,      |
|        | H           | -1.24613787 | -0.87113623 | -1.30826431                      | 1118.3095, 1159.4625, 1180.6049,      |
|        | C           | 0.51158226  | -0.11069363 | 0.77501843                       | 1209.7906, 1258.9587, 1283.1632,      |
|        | H           | 0.85699247  | -1.08716251 | 1.12990642                       | 1303.3086, 1304.4734, 1333.4611,      |
|        | H           | 0.81592324  | 0.61901795  | 1.53041279                       | 1335.6018, 1370.0995, 1383.0010,      |
|        | C           | 1.18773822  | 0.23455464  | -0.54971900                      | 1399.4566, 1403.5325, 1410.8898,      |
|        | H           | 0.68237327  | 1.10260034  | -0.98146679                      | 1416.0111, 1478.1951, 1484.5973,      |
|        | H           | 1.05645465  | -0.58946314 | -1.25619556                      | 1493.1978, 1497.8024, 1503.3844,      |
|        | C           | 2.67813936  | 0.53153736  | -0.40752039                      | 1506.2344, 1508.6630, 1512.3598,      |
|        | H           | 3.07610658  | 0.82193422  | -1.38146426                      | 1682.6622, 3032.5780, 3036.6809,      |
| H      | 2.80884320  | 1.39530570  | 0.24957542  | 3045.3658, 3049.7433, 3057.0068, |                                       |
| C      | 3.48015800  | -0.64685059 | 0.13390027  | 3057.1382, 3065.2243, 3070.2339, |                                       |
| H      | 3.32032624  | -1.53645900 | -0.47846187 | 3085.5093, 3092.5069, 3098.2717, |                                       |
| H      | 3.19086899  | -0.89133505 | 1.15596019  | 3123.8207, 3125.6026, 3132.9929, |                                       |
| H      | 4.54787277  | -0.43047781 | 0.13736073  | 3134.6001, 3781.1121             |                                       |
| O      | -1.85715767 | 2.25553628  | -0.10784289 |                                  |                                       |
| H      | -2.51798569 | 2.34177272  | 0.59792762  |                                  |                                       |
| SP3_22 | C           | -2.57538429 | -1.12261718 | -0.87993029                      | 610.2456i, 42.8651, 58.9654, 77.7712, |
|        | H           | -1.77005913 | -1.54008834 | -1.48390947                      | 99.2896, 118.4891, 119.8995,          |
|        | H           | -3.44289207 | -1.77081542 | -0.99573826                      | 160.5323, 170.6703, 255.6795,         |
|        | H           | -2.83312123 | -0.14197446 | -1.28367805                      |                                       |

|        |   |             |             |             |                                       |
|--------|---|-------------|-------------|-------------|---------------------------------------|
|        | C | -1.03491133 | -0.02739041 | 0.82877582  | 285.8497, 302.6152, 317.6851,         |
|        | H | -1.39438457 | 1.01429535  | 0.49699369  | 462.4401, 468.3082, 642.2027,         |
|        | H | -0.85021409 | 0.10074420  | 1.89841585  | 745.0106, 767.3442, 793.2932,         |
|        | C | -2.17415855 | -1.00218961 | 0.58564327  | 852.0190, 878.5512, 908.7488,         |
|        | H | -3.03789189 | -0.68911411 | 1.17373941  | 949.0260, 971.9529, 1019.2473,        |
|        | H | -1.87772849 | -1.98437071 | 0.96801517  | 1032.8210, 1083.5364, 1104.1278,      |
|        | C | 0.26314231  | -0.32807907 | 0.10214435  | 1110.7450, 1155.4400, 1167.4976,      |
|        | H | 0.10559301  | -0.29181960 | -0.98086123 | 1213.2617, 1254.1017, 1263.5150,      |
|        | H | 0.55906551  | -1.35743146 | 0.32993298  | 1298.4701, 1309.8957, 1325.7160,      |
|        | C | 1.38114288  | 0.63842141  | 0.48027408  | 1361.4758, 1374.8496, 1380.1075,      |
|        | H | 1.62271335  | 0.50465226  | 1.53921519  | 1402.8189, 1410.5662, 1415.8030,      |
|        | H | 1.00807954  | 1.66074930  | 0.37739375  | 1417.4195, 1481.6247, 1483.3093,      |
|        | C | 2.64995313  | 0.47266967  | -0.35143955 | 1493.2402, 1500.1659, 1506.2307,      |
|        | H | 2.41672883  | 0.66170242  | -1.40294118 | 1506.8549, 1510.3340, 1512.5061,      |
|        | H | 3.36942227  | 1.23778259  | -0.05458810 | 1654.8944, 3028.7185, 3037.9826,      |
|        | C | 3.29201062  | -0.90331415 | -0.21274920 | 3041.0572, 3048.4475, 3056.0481,      |
|        | H | 2.64943324  | -1.68752627 | -0.61260440 | 3059.1639, 3061.8709, 3074.6040,      |
|        | H | 3.48538959  | -1.13471153 | 0.83640576  | 3085.4851, 3091.7062, 3092.5732,      |
|        | H | 4.24052535  | -0.95224952 | -0.74623818 | 3125.5148, 3129.3450, 3134.4544,      |
|        | O | -1.72342516 | 2.25379124  | -0.28464456 | 3136.1381, 3778.0428                  |
|        | H | -1.27402653 | 1.97484148  | -1.09870725 |                                       |
|        | C | 2.50365987  | -1.18825023 | 0.88026486  |                                       |
|        | H | 1.69543945  | -1.83512469 | 1.21974517  | 490.5791i, 30.9203, 54.3151, 62.4054, |
|        | H | 3.43849548  | -1.73077835 | 1.01437784  | 78.3671, 88.9872, 112.0858, 147.3743, |
|        | H | 2.52473493  | -0.30861807 | 1.52535748  | 162.5459, 259.1974, 273.9101,         |
|        | C | 1.10653467  | 0.11905557  | -0.79763004 | 314.0160, 324.3197, 459.0069,         |
|        | H | 1.26612957  | 1.04395120  | -0.14105374 | 463.9182, 648.6573, 743.6643,         |
|        | H | 1.07900524  | 0.49059922  | -1.82494596 | 772.8603, 778.4985, 843.0917,         |
|        | C | 2.31675275  | -0.77323332 | -0.57481275 | 890.4628, 915.2183, 960.8070,         |
|        | H | 3.20853495  | -0.24766682 | -0.91962043 | 977.3593, 1018.9469, 1032.2061,       |
|        | H | 2.21682247  | -1.66234820 | -1.20581705 | 1081.1689, 1102.9017, 1109.6345,      |
|        | C | -0.23615876 | -0.46826540 | -0.40583621 | 1158.7475, 1188.3164, 1219.0002,      |
|        | H | -0.22394770 | -0.71996415 | 0.65559082  | 1252.5474, 1261.7338, 1302.4871,      |
|        | H | -0.38491116 | -1.40917066 | -0.95036614 | 1317.0008, 1323.7770, 1361.5629,      |
|        | C | -1.39517152 | 0.47831846  | -0.69657433 | 1368.5133, 1379.6433, 1384.5839,      |
|        | H | -1.34311383 | 0.79033901  | -1.74338058 | 1407.3623, 1415.6996, 1419.1323,      |
|        | H | -1.26674699 | 1.38171705  | -0.09199430 | 1478.7002, 1482.5238, 1492.7222,      |
|        | C | -2.77158739 | -0.12178691 | -0.42070782 | 1497.0894, 1505.1869, 1505.7096,      |
|        | H | -3.53598496 | 0.59849924  | -0.71810524 | 1512.0427, 1512.9736, 1672.1929,      |
|        | H | -2.91343057 | -1.00087405 | -1.05509114 | 3017.0748, 3037.2339, 3038.1221,      |
|        | C | -2.98534805 | -0.50644672 | 1.03927175  | 3047.7004, 3059.5905, 3062.6560,      |
|        | H | -2.78686273 | 0.34316251  | 1.69500960  | 3070.0315, 3074.3764, 3086.7822,      |
|        | H | -2.32496023 | -1.31896894 | 1.34083652  | 3089.7153, 3105.4992, 3126.9942,      |
|        | H | -4.00959639 | -0.83370951 | 1.21419257  | 3132.7346, 3135.5505, 3137.8725,      |
|        | O | 1.38180058  | 2.28537738  | 0.72524009  | 3781.2416                             |
|        | H | 1.07389842  | 2.89958753  | 0.03949116  |                                       |
| SP3_23 | C | 2.50365987  | -1.18825023 | 0.88026486  |                                       |
|        | H | 1.69543945  | -1.83512469 | 1.21974517  |                                       |
|        | H | 3.43849548  | -1.73077835 | 1.01437784  |                                       |
|        | H | 2.52473493  | -0.30861807 | 1.52535748  |                                       |
|        | C | 1.10653467  | 0.11905557  | -0.79763004 |                                       |
|        | H | 1.26612957  | 1.04395120  | -0.14105374 |                                       |
|        | H | 1.07900524  | 0.49059922  | -1.82494596 |                                       |
|        | C | 2.31675275  | -0.77323332 | -0.57481275 |                                       |
|        | H | 3.20853495  | -0.24766682 | -0.91962043 |                                       |
|        | H | 2.21682247  | -1.66234820 | -1.20581705 |                                       |
|        | C | -0.23615876 | -0.46826540 | -0.40583621 |                                       |
|        | H | -0.22394770 | -0.71996415 | 0.65559082  |                                       |
|        | H | -0.38491116 | -1.40917066 | -0.95036614 |                                       |
|        | C | -1.39517152 | 0.47831846  | -0.69657433 |                                       |
|        | H | -1.34311383 | 0.79033901  | -1.74338058 |                                       |
|        | H | -1.26674699 | 1.38171705  | -0.09199430 |                                       |
|        | C | -2.77158739 | -0.12178691 | -0.42070782 |                                       |
|        | H | -3.53598496 | 0.59849924  | -0.71810524 |                                       |
|        | H | -2.91343057 | -1.00087405 | -1.05509114 |                                       |
|        | C | -2.98534805 | -0.50644672 | 1.03927175  |                                       |
|        | H | -2.78686273 | 0.34316251  | 1.69500960  |                                       |
|        | H | -2.32496023 | -1.31896894 | 1.34083652  |                                       |
|        | H | -4.00959639 | -0.83370951 | 1.21419257  |                                       |
|        | O | 1.38180058  | 2.28537738  | 0.72524009  |                                       |
|        | H | 1.07389842  | 2.89958753  | 0.03949116  |                                       |
|        | C | 3.22828244  | -0.60444921 | 0.15492352  | 601.5596i, 35.1216, 66.3268, 82.5818, |
|        | H | 3.37729930  | -0.95126704 | -0.86873862 | 95.7964, 106.4653, 127.9601,          |
|        | H | 4.18368309  | -0.23709039 | 0.52746043  | 167.9570, 215.8416, 249.7995,         |
|        | H | 2.94498753  | -1.46343025 | 0.76143811  | 286.7372, 293.0537, 346.3886,         |
|        | C | 0.84280976  | 0.07560021  | -0.42048418 | 422.9649, 510.5868, 654.6433,         |
|        | H | 0.15649992  | 0.99783294  | -0.41940872 | 721.0588, 751.4629, 799.7535,         |
|        | H | 0.96849921  | -0.15925698 | -1.48211847 | 849.3729, 853.9251, 913.6815,         |
|        | C | 2.16556326  | 0.49093240  | 0.20409484  | 951.0794, 964.7447, 1012.6963,        |
|        | H | 1.99237000  | 0.78884839  | 1.24169579  | 1045.1796, 1071.6171, 1084.8482,      |
|        | H | 2.54494892  | 1.37235060  | -0.31887961 | 1113.9632, 1147.7644, 1176.4437,      |
|        | C | 0.10812798  | -1.03990770 | 0.30014264  | 1181.8992, 1244.5375, 1270.0729,      |
|        | H | -0.09201576 | -0.73006386 | 1.32940164  |                                       |
| SP3_24 | C | 3.22828244  | -0.60444921 | 0.15492352  |                                       |
|        | H | 3.37729930  | -0.95126704 | -0.86873862 |                                       |
|        | H | 4.18368309  | -0.23709039 | 0.52746043  |                                       |
|        | H | 2.94498753  | -1.46343025 | 0.76143811  |                                       |
|        | C | 0.84280976  | 0.07560021  | -0.42048418 |                                       |
|        | H | 0.15649992  | 0.99783294  | -0.41940872 |                                       |
|        | H | 0.96849921  | -0.15925698 | -1.48211847 |                                       |
|        | C | 2.16556326  | 0.49093240  | 0.20409484  |                                       |
|        | H | 1.99237000  | 0.78884839  | 1.24169579  |                                       |
|        | H | 2.54494892  | 1.37235060  | -0.31887961 |                                       |
|        | C | 0.10812798  | -1.03990770 | 0.30014264  |                                       |
|        | H | -0.09201576 | -0.73006386 | 1.32940164  |                                       |

|        |   |             |             |             |                                       |
|--------|---|-------------|-------------|-------------|---------------------------------------|
|        | H | 0.76993655  | -1.90809082 | 0.36630922  | 1292.1155, 1318.9966, 1334.2072,      |
|        | C | -1.18630559 | -1.47129092 | -0.38774103 | 1365.3462, 1373.8060, 1378.1977,      |
|        | H | -1.61660320 | -2.30587746 | 0.17206861  | 1391.3150, 1402.5704, 1408.8132,      |
|        | H | -0.94212321 | -1.85751302 | -1.38107413 | 1415.3998, 1478.6315, 1490.1937,      |
|        | C | -2.23962016 | -0.37156503 | -0.52006574 | 1491.1746, 1494.9537, 1502.5526,      |
|        | H | -1.86772579 | 0.42918853  | -1.16221033 | 1507.0249, 1509.6397, 1514.9501,      |
|        | H | -3.11064809 | -0.79169720 | -1.02666412 | 1708.9676, 3040.2839, 3044.0031,      |
|        | C | -2.66524968 | 0.21574431  | 0.82038156  | 3045.3498, 3054.2679, 3055.6015,      |
|        | H | -1.84904313 | 0.76557799  | 1.28741136  | 3062.3984, 3063.1627, 3074.4600,      |
|        | H | -2.98619282 | -0.57194013 | 1.50547588  | 3080.9779, 3088.0661, 3099.5480,      |
|        | H | -3.49306776 | 0.91273074  | 0.69607930  | 3125.7420, 3130.4460, 3139.4462,      |
|        | O | -0.37362962 | 2.39211770  | -0.25764109 | 3139.7851, 3784.6138                  |
|        | H | 0.48658413  | 2.80237195  | -0.07462734 |                                       |
|        | C | 3.05723639  | -1.22369258 | 0.26108765  | 639.0892i, 43.7132, 57.3266, 62.3336, |
|        | H | 3.60639273  | -0.28749641 | 0.36216364  | 94.5988, 108.8046, 121.2451,          |
|        | H | 3.45213416  | -1.93315328 | 0.98699614  | 134.5449, 229.4453, 244.1616,         |
|        | H | 3.25166935  | -1.62050822 | -0.73635637 | 255.4934, 284.5943, 301.7761,         |
|        | C | 0.99804226  | -0.00355777 | -0.53937292 | 414.2316, 529.0445, 644.1379,         |
|        | H | 1.65944317  | 0.93326218  | -0.48388473 | 742.6141, 755.8040, 787.9324,         |
|        | H | 1.14257693  | -0.36125295 | -1.56336465 | 848.7330, 870.8717, 899.4232,         |
|        | C | 1.56661867  | -0.98702465 | 0.46586611  | 951.2291, 974.6337, 1039.1754,        |
|        | H | 1.02677355  | -1.93491796 | 0.38753051  | 1050.8444, 1076.5167, 1092.9466,      |
|        | H | 1.38402901  | -0.60634788 | 1.47454237  | 1117.8653, 1139.9147, 1184.6927,      |
|        | C | -0.44333347 | 0.41196006  | -0.30467994 | 1227.9967, 1248.3125, 1290.4574,      |
|        | H | -0.71791253 | 1.19455554  | -1.01828304 | 1298.8668, 1312.2679, 1330.4427,      |
|        | H | -0.52876163 | 0.84885757  | 0.69471442  | 1345.0461, 1378.3635, 1387.1646,      |
|        | C | -1.43081944 | -0.74793929 | -0.44046725 | 1393.3902, 1406.4642, 1412.6147,      |
|        | H | -1.27458847 | -1.45647934 | 0.37719157  | 1416.2208, 1481.5935, 1485.0245,      |
|        | H | -1.21348325 | -1.28782039 | -1.36621488 | 1493.6823, 1499.8713, 1502.9320,      |
|        | C | -2.89162432 | -0.30441949 | -0.44484339 | 1506.0869, 1511.0746, 1513.2772,      |
|        | H | -3.06230024 | 0.35668059  | -1.29853536 | 1701.1489, 3033.9823, 3041.8510,      |
|        | H | -3.52572288 | -1.17916029 | -0.60018004 | 3045.8353, 3049.5394, 3055.4202,      |
|        | C | -3.31276487 | 0.40196059  | 0.83896292  | 3058.5234, 3059.9062, 3068.3475,      |
|        | H | -2.78703299 | 1.34811268  | 0.96585547  | 3082.1252, 3085.7630, 3096.0490,      |
|        | H | -3.09598330 | -0.21869046 | 1.71044082  | 3125.6241, 3127.9567, 3135.0427,      |
|        | H | -4.38057539 | 0.61719173  | 0.83857363  | 3138.4531, 3784.6220                  |
|        | O | 2.29170612  | 2.21479600  | -0.01216765 |                                       |
|        | H | 1.46956146  | 2.58507769  | 0.34683272  |                                       |
| SP3_25 | C | -3.34341613 | -0.61943474 | -0.14521651 | 481.6835i, 29.4102, 49.6756, 62.3579, |
|        | H | -3.48164885 | 0.40491336  | -0.49388682 | 75.9933, 91.3970, 110.1162, 127.0616, |
|        | H | -3.94360086 | -1.27364172 | -0.77612673 | 228.5277, 243.3711, 262.7171,         |
|        | H | -3.73182561 | -0.68504857 | 0.87230561  | 288.0665, 306.8422, 414.4050,         |
|        | C | -1.02033887 | -0.08910916 | 0.68347136  | 519.6289, 653.6551, 736.9849,         |
|        | H | -1.09792294 | 0.96127254  | 0.23361784  | 763.8748, 781.8198, 855.7918,         |
|        | H | -1.45440776 | -0.01093029 | 1.68356771  | 886.4030, 904.2547, 948.3794,         |
|        | C | -1.86858228 | -0.99575118 | -0.18943728 | 969.2020, 1037.0392, 1050.3487,       |
|        | H | -1.73293996 | -2.03003180 | 0.14418916  | 1073.0418, 1091.0640, 1117.5736,      |
|        | H | -1.51260385 | -0.95171272 | -1.21956513 | 1154.9966, 1189.7467, 1208.7709,      |
|        | C | 0.46165857  | -0.41745864 | 0.76086585  | 1257.3349, 1281.1699, 1298.9137,      |
|        | H | 0.58164405  | -1.41496470 | 1.20032332  | 1312.2942, 1326.3168, 1340.6928,      |
|        | H | 0.93577805  | 0.28371353  | 1.44933154  | 1373.3676, 1383.0654, 1399.2059,      |
|        | C | 1.17206829  | -0.37184658 | -0.58844543 | 1408.4097, 1411.6633, 1417.0891,      |
|        | H | 0.99605679  | 0.60735298  | -1.04490455 | 1477.7529, 1485.0090, 1491.8184,      |
|        | H | 0.72854574  | -1.11259682 | -1.25621141 | 1497.3473, 1504.1964, 1505.9132,      |
|        | C | 2.67479519  | -0.63016659 | -0.49796688 | 1509.2351, 1513.0591, 1678.9879,      |
|        | H | 2.84475242  | -1.60682835 | -0.03632562 | 3021.5127, 3037.0981, 3044.6458,      |
|        | H | 3.08000552  | -0.69455755 | -1.50940939 | 3049.3381, 3057.3758, 3060.6956,      |
|        | C | 3.43703545  | 0.44080011  | 0.27523433  |                                       |
| SP3_26 | C | -3.34341613 | -0.61943474 | -0.14521651 | 481.6835i, 29.4102, 49.6756, 62.3579, |
|        | H | -3.48164885 | 0.40491336  | -0.49388682 | 75.9933, 91.3970, 110.1162, 127.0616, |
|        | H | -3.94360086 | -1.27364172 | -0.77612673 | 228.5277, 243.3711, 262.7171,         |
|        | H | -3.73182561 | -0.68504857 | 0.87230561  | 288.0665, 306.8422, 414.4050,         |
|        | C | -1.02033887 | -0.08910916 | 0.68347136  | 519.6289, 653.6551, 736.9849,         |
|        | H | -1.09792294 | 0.96127254  | 0.23361784  | 763.8748, 781.8198, 855.7918,         |
|        | H | -1.45440776 | -0.01093029 | 1.68356771  | 886.4030, 904.2547, 948.3794,         |
|        | C | -1.86858228 | -0.99575118 | -0.18943728 | 969.2020, 1037.0392, 1050.3487,       |
|        | H | -1.73293996 | -2.03003180 | 0.14418916  | 1073.0418, 1091.0640, 1117.5736,      |
|        | H | -1.51260385 | -0.95171272 | -1.21956513 | 1154.9966, 1189.7467, 1208.7709,      |
|        | C | 0.46165857  | -0.41745864 | 0.76086585  | 1257.3349, 1281.1699, 1298.9137,      |
|        | H | 0.58164405  | -1.41496470 | 1.20032332  | 1312.2942, 1326.3168, 1340.6928,      |
|        | H | 0.93577805  | 0.28371353  | 1.44933154  | 1373.3676, 1383.0654, 1399.2059,      |
|        | C | 1.17206829  | -0.37184658 | -0.58844543 | 1408.4097, 1411.6633, 1417.0891,      |
|        | H | 0.99605679  | 0.60735298  | -1.04490455 | 1477.7529, 1485.0090, 1491.8184,      |
|        | H | 0.72854574  | -1.11259682 | -1.25621141 | 1497.3473, 1504.1964, 1505.9132,      |
|        | C | 2.67479519  | -0.63016659 | -0.49796688 | 1509.2351, 1513.0591, 1678.9879,      |
|        | H | 2.84475242  | -1.60682835 | -0.03632562 | 3021.5127, 3037.0981, 3044.6458,      |
|        | H | 3.08000552  | -0.69455755 | -1.50940939 | 3049.3381, 3057.3758, 3060.6956,      |
|        | C | 3.43703545  | 0.44080011  | 0.27523433  |                                       |

|        |             |             |             |                                  |                                       |
|--------|-------------|-------------|-------------|----------------------------------|---------------------------------------|
|        | H           | 3.15689079  | 0.45713187  | 1.32796403                       | 3064.9709, 3084.4205, 3087.3883,      |
|        | H           | 3.23476061  | 1.43043739  | -0.13787617                      | 3096.4405, 3105.9698, 3126.9155,      |
|        | H           | 4.51196997  | 0.27006585  | 0.22613223                       | 3127.6121, 3134.6725, 3136.6348,      |
|        | O           | -1.29302902 | 2.34853171  | -0.35317888                      | 3779.8916                             |
|        | H           | -1.85054330 | 2.67497199  | 0.37127272                       |                                       |
| SP3_27 | C           | 2.68828136  | -1.75508612 | -0.06255939                      | 474.9363i, 39.5419, 59.0360, 68.7598, |
|        | H           | 2.82480460  | -1.80334039 | -1.14417404                      | 89.5946, 114.2514, 131.1905,          |
|        | H           | 3.59742390  | -2.12798121 | 0.40755832                       | 144.7091, 178.3692, 251.8659,         |
|        | H           | 1.87594657  | -2.43125580 | 0.20226938                       | 292.4789, 307.1547, 324.6690,         |
|        | C           | 1.18848368  | 0.27304513  | -0.32841809                      | 461.0637, 468.4401, 630.2088,         |
|        | H           | 1.10096509  | 1.35585401  | 0.03940059                       | 746.4768, 761.5871, 789.1063,         |
|        | H           | 1.37156899  | 0.35029740  | -1.40432090                      | 859.5561, 887.8222, 915.0903,         |
|        | C           | 2.39027511  | -0.32478038 | 0.38298986                       | 970.6399, 972.4386, 1018.1286,        |
|        | H           | 2.21319375  | -0.30428400 | 1.46062489                       | 1033.6583, 1079.6924, 1106.3972,      |
|        | H           | 3.26217897  | 0.30399021  | 0.19761360                       | 1114.3894, 1157.0015, 1186.4531,      |
|        | C           | -0.14203549 | -0.40379256 | -0.05786102                      | 1223.4272, 1249.9848, 1269.1771,      |
|        | H           | -0.26822338 | -0.51755086 | 1.02176486                       | 1299.8901, 1317.2193, 1318.9656,      |
|        | H           | -0.12668190 | -1.41493492 | -0.47969175                      | 1332.7621, 1363.9724, 1379.4484,      |
|        | C           | -1.32197046 | 0.36211384  | -0.64782451                      | 1382.4707, 1403.8189, 1408.0745,      |
|        | H           | -1.10557039 | 0.58762644  | -1.69636520                      | 1416.6211, 1480.6123, 1492.0209,      |
|        | H           | -1.40967164 | 1.32209968  | -0.13029047                      | 1492.8568, 1499.3882, 1503.0827,      |
|        | C           | -2.65094650 | -0.38360094 | -0.56015314                      | 1507.5690, 1510.1389, 1513.2573,      |
|        | H           | -3.42361547 | 0.21147864  | -1.05039179                      | 1668.4597, 3029.1735, 3039.1087,      |
|        | H           | -2.57635273 | -1.31725030 | -1.12407463                      | 3048.0868, 3053.3544, 3059.2185,      |
|        | C           | -3.08059526 | -0.68581284 | 0.87127757                       | 3059.9540, 3063.0714, 3071.2718,      |
| H      | -3.10300493 | 0.22751859  | 1.46843617  | 3084.7048, 3093.2807, 3100.0891, |                                       |
| H      | -2.39612412 | -1.38185597 | 1.35556535  | 3126.6651, 3129.1409, 3134.5596, |                                       |
| H      | -4.07511001 | -1.12952399 | 0.89892296  | 3137.5941, 3782.9787             |                                       |
| O      | 0.91365950  | 2.81578248  | 0.35985194  |                                  |                                       |
| H      | 0.50004213  | 3.05033582  | -0.48637056 |                                  |                                       |
| SP3_28 | C           | -2.33028452 | -2.07675697 | 0.09061698                       | 465.9186i, 33.7786, 57.7526, 63.8302, |
|        | H           | -2.28974424 | -2.21307785 | 1.17257093                       | 78.2611, 101.8927, 111.3111,          |
|        | H           | -3.22664223 | -2.57486518 | -0.27691054                      | 146.2286, 164.4966, 250.8306,         |
|        | H           | -1.46824336 | -2.58305848 | -0.34250219                      | 271.9255, 309.8427, 331.9304,         |
|        | C           | -1.16535947 | 0.16749844  | 0.31502161                       | 458.0024, 463.7624, 627.1961,         |
|        | H           | -1.32384224 | 1.26996885  | 0.04638048                       | 743.5881, 774.4256, 783.8551,         |
|        | H           | -1.18120777 | 0.12931799  | 1.40863064                       | 870.6951, 883.9494, 913.7139,         |
|        | C           | -2.34467421 | -0.59230168 | -0.26859651                      | 964.6451, 980.0841, 1016.9073,        |
|        | H           | -2.34096284 | -0.47572289 | -1.35464349                      | 1034.9820, 1080.6034, 1103.7391,      |
|        | H           | -3.27053117 | -0.14028511 | 0.08998045                       | 1109.1602, 1154.9035, 1192.0455,      |
|        | C           | 0.20085213  | -0.22610770 | -0.21424932                      | 1208.8346, 1247.7779, 1275.2918,      |
|        | H           | 0.18932710  | -0.18418090 | -1.30826976                      | 1294.3357, 1323.3685, 1328.4371,      |
|        | H           | 0.39825661  | -1.26694001 | 0.05676216                       | 1334.9240, 1362.7134, 1378.6203,      |
|        | C           | 1.31803382  | 0.66478852  | 0.31821815                       | 1385.1544, 1402.0973, 1409.8708,      |
|        | H           | 1.35998539  | 0.57094530  | 1.40856158                       | 1415.1240, 1478.5844, 1491.6067,      |
|        | H           | 1.06324583  | 1.70474187  | 0.10037771                       | 1492.4931, 1497.9235, 1502.1552,      |
|        | C           | 2.69267398  | 0.34970822  | -0.26595863                      | 1506.0632, 1510.3421, 1512.1418,      |
|        | H           | 2.65802286  | 0.48310256  | -1.35031280                      | 1679.2057, 3030.3877, 3039.2013,      |
|        | H           | 3.41126010  | 1.08007598  | 0.11035837                       | 3051.3638, 3052.9138, 3058.1745,      |
|        | C           | 3.18775458  | -1.05521501 | 0.05986631                       | 3060.0183, 3063.5156, 3072.7969,      |
| H      | 2.56488743  | -1.81853606 | -0.40588300 | 3086.6824, 3093.8750, 3099.5083, |                                       |
| H      | 3.17641115  | -1.22861165 | 1.13767149  | 3124.9682, 3129.1012, 3134.9655, |                                       |
| H      | 4.20782528  | -1.20522028 | -0.29193809 | 3137.2787, 3781.6594             |                                       |
| O      | -1.50147133 | 2.75743187  | -0.14670654 |                                  |                                       |
| H      | -1.27025519 | 3.00320788  | 0.76330680  |                                  |                                       |
| SP3_29 | C           | -3.10803955 | -1.16750725 | 0.16427405                       | 461.3798i, 28.1822, 47.2869, 60.6516, |
|        | H           | -3.64745073 | -0.27999120 | -0.16804449                      | 67.1000, 85.8776, 110.4406, 129.2257, |
|        | H           | -3.61408586 | -2.04309887 | -0.24006396                      | 232.2545, 248.0555, 277.7176,         |

|        |   |             |             |             |                                       |
|--------|---|-------------|-------------|-------------|---------------------------------------|
|        | H | -3.17449449 | -1.21625551 | 1.25262054  | 288.5167, 297.8032, 416.8327,         |
|        | C | -0.92177712 | 0.09271793  | 0.29529824  | 527.5478, 623.7893, 734.4732,         |
|        | H | -1.52626823 | 1.02222230  | 0.00819013  | 769.1375, 786.2042, 869.2778,         |
|        | H | -0.94062613 | 0.06347231  | 1.38912818  | 883.0879, 909.2305, 951.5852,         |
|        | C | -1.65394444 | -1.10345957 | -0.28495970 | 966.5956, 1042.6011, 1052.2133,       |
|        | H | -1.13885585 | -2.02050550 | 0.01344075  | 1075.6964, 1089.4101, 1115.5587,      |
|        | H | -1.60185455 | -1.05733752 | -1.37551537 | 1152.3657, 1190.9410, 1223.8582,      |
|        | C | 0.49055243  | 0.32326728  | -0.21458029 | 1234.2479, 1291.7489, 1299.1543,      |
|        | H | 0.83920426  | 1.29184834  | 0.14657254  | 1309.3900, 1328.3946, 1339.7983,      |
|        | H | 0.47429010  | 0.38309932  | -1.30703558 | 1345.4413, 1378.9803, 1392.1334,      |
|        | C | 1.47091174  | -0.76795413 | 0.21573530  | 1399.7539, 1410.0247, 1416.3215,      |
|        | H | 1.10824854  | -1.73741352 | -0.13105836 | 1480.6686, 1486.8784, 1491.9387,      |
|        | H | 1.49391199  | -0.81585479 | 1.30939459  | 1500.2199, 1502.9601, 1505.1537,      |
|        | C | 2.88928814  | -0.55507421 | -0.30984630 | 1510.4370, 1513.3061, 1694.3808,      |
|        | H | 3.49759814  | -1.41894241 | -0.03521061 | 3034.9934, 3045.8173, 3047.0791,      |
|        | H | 2.86496396  | -0.53041702 | -1.40243213 | 3051.5510, 3056.8045, 3057.5742,      |
|        | C | 3.55436779  | 0.71257171  | 0.21490694  | 3060.1735, 3080.4710, 3087.0519,      |
|        | H | 3.53719004  | 0.73393626  | 1.30618719  | 3089.1378, 3107.5309, 3124.5039,      |
|        | H | 3.05124129  | 1.60992946  | -0.14333900 | 3126.8202, 3135.9715, 3137.8202,      |
|        | H | 4.59446689  | 0.77080019  | -0.10384004 | 3784.2202                             |
|        | O | -2.41183483 | 2.23112460  | -0.20760657 |                                       |
|        | H | -2.85095473 | 2.18814077  | 0.65688875  |                                       |
|        | C | -2.05545979 | -1.40363684 | -0.85281755 |                                       |
|        | H | -1.12961803 | -1.59032501 | -1.39834410 | 600.3718i, 28.4723, 40.7076, 54.7592, |
|        | H | -2.68127042 | -2.28907418 | -0.95444552 | 78.7183, 84.5202, 125.2500, 170.7146, |
|        | H | -2.56851516 | -0.56816371 | -1.33186323 | 219.8626, 249.1675, 285.8529,         |
|        | C | -1.04149468 | 0.22128714  | 0.82184674  | 296.4108, 340.7662, 435.8465,         |
|        | H | -1.75948314 | 1.05866567  | 0.50537175  | 513.4398, 649.6787, 727.5013,         |
|        | H | -0.87385199 | 0.40856669  | 1.88513609  | 754.3454, 799.0910, 850.1016,         |
|        | C | -1.78695878 | -1.08814229 | 0.61341836  | 856.0005, 902.1214, 957.6677,         |
|        | H | -2.73223683 | -1.03697618 | 1.15560256  | 966.2098, 1012.2011, 1043.7804,       |
|        | H | -1.21806486 | -1.90272187 | 1.07107259  | 1072.7236, 1097.4202, 1122.9562,      |
|        | C | 0.25172230  | 0.39271515  | 0.04021486  | 1141.9540, 1166.7422, 1225.5203,      |
|        | H | 0.66127570  | 1.38038989  | 0.26031406  | 1243.7510, 1286.5424, 1293.4924,      |
|        | H | 0.04429977  | 0.37176180  | -1.03453930 | 1318.6055, 1332.3563, 1363.1718,      |
|        | C | 1.29188534  | -0.67925734 | 0.36082847  | 1375.3466, 1378.4886, 1396.7145,      |
|        | H | 0.87171745  | -1.66253356 | 0.13776447  | 1401.0844, 1413.9477, 1415.9346,      |
|        | H | 1.49871727  | -0.66677129 | 1.43591638  | 1481.0770, 1490.0226, 1491.9512,      |
|        | C | 2.60006963  | -0.51372599 | -0.40963948 | 1496.7506, 1503.7681, 1507.0698,      |
|        | H | 3.24034601  | -1.37292151 | -0.20168990 | 1512.7149, 1515.8449, 1690.7656,      |
|        | H | 2.38850308  | -0.54052806 | -1.48203640 | 3033.2804, 3043.7385, 3046.7087,      |
|        | C | 3.35577332  | 0.76603923  | -0.06909354 | 3049.5708, 3059.2635, 3060.8055,      |
|        | H | 3.52964175  | 0.83662711  | 1.00614520  | 3072.7965, 3082.2011, 3087.0065,      |
|        | H | 2.80502312  | 1.65471517  | -0.37553627 | 3090.9273, 3100.9642, 3125.9956,      |
|        | H | 4.32448587  | 0.79415034  | -0.56656841 | 3127.8453, 3135.7731, 3137.2933,      |
|        | O | -2.53311125 | 2.08774330  | -0.27699077 | 3783.9085                             |
|        | H | -1.82930368 | 2.25151791  | -0.92492097 |                                       |
|        | C | -3.17410692 | -1.11342333 | 0.16224349  |                                       |
|        | H | -3.68687344 | -0.15879939 | 0.04393942  | 643.2775i, 26.1053, 56.7273, 65.1062, |
|        | H | -3.72541386 | -1.87046836 | -0.39380083 | 84.8728, 100.8535, 120.9810,          |
|        | H | -3.20663376 | -1.38284765 | 1.21888134  | 128.1729, 218.1147, 247.6615,         |
|        | C | -0.95065998 | 0.04603757  | 0.44344770  | 257.5613, 285.2078, 293.1566,         |
|        | H | -1.56583966 | 1.01349211  | 0.38364568  | 416.5186, 519.2477, 642.0684,         |
|        | H | -0.93328501 | -0.17946043 | 1.51416897  | 733.5532, 754.1535, 787.5508,         |
|        | C | -1.73398422 | -1.00381490 | -0.32192914 | 857.2050, 870.2352, 899.9284,         |
|        | H | -1.23704116 | -1.97263601 | -0.22294595 | 951.3111, 974.5694, 1043.7365,        |
|        | H | -1.71668301 | -0.75162876 | -1.38573605 | 1046.5780, 1076.3744, 1090.5852,      |
|        | C | 0.44728898  | 0.34019879  | -0.07286794 | 1116.9195, 1140.3273, 1183.8911,      |
| SP3_30 |   |             |             |             |                                       |
| SP3_31 |   |             |             |             |                                       |

|       |   |             |             |             |                                       |
|-------|---|-------------|-------------|-------------|---------------------------------------|
|       | H | 0.83929530  | 1.21545293  | 0.44883602  | 1231.6673, 1241.7376, 1287.7462,      |
|       | H | 0.39393139  | 0.60058543  | -1.13622813 | 1302.6059, 1308.5772, 1337.8955,      |
|       | C | 1.41452063  | -0.83034308 | 0.10020791  | 1343.7940, 1376.7734, 1389.0081,      |
|       | H | 1.01193660  | -1.70804080 | -0.40854637 | 1395.4521, 1404.8411, 1413.0143,      |
|       | H | 1.47552135  | -1.08581879 | 1.16296836  | 1416.6076, 1481.4199, 1485.0968,      |
|       | C | 2.81794625  | -0.54951802 | -0.43323989 | 1492.2808, 1500.3486, 1503.6651,      |
|       | H | 3.41098316  | -1.46249077 | -0.35454528 | 1505.3166, 1511.8136, 1512.8015,      |
|       | H | 2.75489067  | -0.31489445 | -1.49916762 | 1708.3503, 3025.6744, 3041.7191,      |
|       | C | 3.53811601  | 0.57876279  | 0.29691657  | 3044.5006, 3051.4147, 3057.3141,      |
|       | H | 3.56075635  | 0.39019799  | 1.37177904  | 3059.9120, 3060.4417, 3077.1859,      |
|       | H | 3.04940323  | 1.53953377  | 0.13856744  | 3085.4469, 3089.0937, 3102.5881,      |
|       | H | 4.56724556  | 0.67488790  | -0.04708061 | 3126.8781, 3128.8280, 3137.0190,      |
|       | O | -2.20806482 | 2.26990490  | -0.14181520 | 3138.2398, 3784.3378                  |
|       | H | -1.48239973 | 2.48629721  | -0.74888607 |                                       |
|       | C | -3.81332056 | -0.62861386 | -0.19201950 |                                       |
|       | H | -3.88108854 | -1.67688837 | 0.10278541  | 477.8041i, 21.7177, 61.3957, 64.5163, |
|       | H | -4.70086522 | -0.11807318 | 0.17977802  | 68.4984, 83.7073, 97.3367, 146.4046,  |
|       | H | -3.83658006 | -0.58950650 | -1.28187326 | 168.0912, 245.2546, 248.5630,         |
|       | C | -1.28115278 | -0.69312682 | -0.16547883 | 249.0780, 307.0389, 415.5852,         |
|       | H | -1.30647842 | -1.74963742 | 0.12544126  | 490.8711, 617.4731, 735.0756,         |
|       | H | -1.27192860 | -0.67580110 | -1.25915706 | 752.4520, 822.3048, 846.8772,         |
|       | C | -2.53612651 | 0.00500137  | 0.34295261  | 896.8797, 926.9142, 950.2160,         |
|       | H | -2.49212268 | 1.05781349  | 0.05474213  | 1022.5616, 1024.8165, 1066.0965,      |
|       | H | -2.54128993 | -0.01967499 | 1.43602946  | 1090.8080, 1091.7504, 1096.4144,      |
|       | C | 0.00016124  | -0.07187517 | 0.35366978  | 1169.9944, 1202.9729, 1211.1238,      |
|       | H | 0.00018203  | -0.02992163 | 1.44709757  | 1248.2211, 1278.0476, 1283.3965,      |
|       | H | 0.00004906  | 1.02101848  | 0.00869194  | 1309.6159, 1326.7099, 1336.2212,      |
|       | C | 1.28158432  | -0.69285143 | -0.16554803 | 1359.9826, 1366.3082, 1402.1338,      |
|       | H | 1.27240482  | -0.67531528 | -1.25922303 | 1405.2085, 1413.5688, 1414.1004,      |
|       | H | 1.30702168  | -1.74941837 | 0.12516111  | 1477.8022, 1486.1682, 1497.6686,      |
|       | C | 2.53645348  | 0.00531905  | 0.34308143  | 1498.3248, 1503.3221, 1503.3963,      |
|       | H | 2.49230268  | 1.05822119  | 0.05522284  | 1512.1922, 1512.9538, 1676.2909,      |
|       | H | 2.54164150  | -0.01969979 | 1.43614771  | 3023.1779, 3027.6958, 3048.4332,      |
|       | C | 3.81373589  | -0.62792649 | -0.19211744 | 3049.1351, 3051.6255, 3057.2203,      |
|       | H | 3.83699313  | -0.58843110 | -1.28195704 | 3057.5706, 3065.3347, 3073.9752,      |
|       | H | 3.88164619  | -1.67629608 | 0.10231769  | 3090.0601, 3092.3587, 3124.0581,      |
|       | H | 4.70120787  | -0.11739536 | 0.17986618  | 3124.2128, 3132.8206, 3132.9152,      |
|       | O | -0.00108820 | 2.49571177  | -0.33748997 | 3784.9289                             |
|       | H | -0.00240035 | 2.80775191  | 0.58160866  |                                       |
| SP4_1 | C | -3.81139355 | -0.54566225 | -0.24622799 |                                       |
|       | H | -3.87923287 | -1.63413191 | -0.21423559 | 654.3588i, 60.7279, 61.7822, 62.9867, |
|       | H | -4.70045742 | -0.14044124 | 0.23521922  | 77.9287, 81.1383, 101.7059, 153.5370, |
|       | H | -3.83241503 | -0.24433498 | -1.29460150 | 155.8558, 244.7787, 246.8357,         |
|       | C | -1.27945403 | -0.61631481 | -0.22463198 | 250.3963, 307.0031, 421.3146,         |
|       | H | -1.30335535 | -1.71152376 | -0.19307596 | 491.1176, 612.8521, 733.8984,         |
|       | H | -1.27160694 | -0.34620419 | -1.28627532 | 753.9775, 817.0015, 846.4811,         |
|       | C | -2.53710972 | -0.05983863 | 0.43115117  | 896.4326, 926.2514, 931.0890,         |
|       | H | -2.49238114 | 1.03133424  | 0.40944855  | 1020.8695, 1021.9852, 1065.9560,      |
|       | H | -2.54566289 | -0.34762967 | 1.48541120  | 1089.8239, 1090.0924, 1096.7922,      |
|       | C | 0.00060799  | -0.13252284 | 0.42618549  | 1165.6269, 1182.6058, 1214.9691,      |
|       | H | 0.00055876  | -0.34222585 | 1.50020046  | 1245.6010, 1274.5219, 1278.8265,      |
|       | H | 0.00159836  | 1.01766898  | 0.38584169  | 1311.6070, 1326.4025, 1335.8372,      |
|       | C | 1.28047519  | -0.61611846 | -0.22502560 | 1367.5111, 1401.6930, 1405.1097,      |
|       | H | 1.27226464  | -0.34516978 | -1.28634742 | 1407.8670, 1413.5587, 1414.1550,      |
|       | H | 1.30467505  | -1.71135027 | -0.19355904 | 1478.7572, 1487.2728, 1497.5589,      |
|       | C | 2.53788303  | -0.05897831 | 0.43058045  | 1498.0698, 1503.7517, 1503.8320,      |
|       | H | 2.49236230  | 1.03208589  | 0.40799481  | 1512.4799, 1512.9333, 1697.5813,      |
|       | H | 2.54677586  | -0.34649621 | 1.48493644  | 3020.6955, 3024.5587, 3047.4966,      |
| SP4_2 | C | -3.81139355 | -0.54566225 | -0.24622799 |                                       |
|       | H | -3.87923287 | -1.63413191 | -0.21423559 | 654.3588i, 60.7279, 61.7822, 62.9867, |
|       | H | -4.70045742 | -0.14044124 | 0.23521922  | 77.9287, 81.1383, 101.7059, 153.5370, |
|       | H | -3.83241503 | -0.24433498 | -1.29460150 | 155.8558, 244.7787, 246.8357,         |
|       | C | -1.27945403 | -0.61631481 | -0.22463198 | 250.3963, 307.0031, 421.3146,         |
|       | H | -1.30335535 | -1.71152376 | -0.19307596 | 491.1176, 612.8521, 733.8984,         |
|       | H | -1.27160694 | -0.34620419 | -1.28627532 | 753.9775, 817.0015, 846.4811,         |
|       | C | -2.53710972 | -0.05983863 | 0.43115117  | 896.4326, 926.2514, 931.0890,         |
|       | H | -2.49238114 | 1.03133424  | 0.40944855  | 1020.8695, 1021.9852, 1065.9560,      |
|       | H | -2.54566289 | -0.34762967 | 1.48541120  | 1089.8239, 1090.0924, 1096.7922,      |
|       | C | 0.00060799  | -0.13252284 | 0.42618549  | 1165.6269, 1182.6058, 1214.9691,      |
|       | H | 0.00055876  | -0.34222585 | 1.50020046  | 1245.6010, 1274.5219, 1278.8265,      |
|       | H | 0.00159836  | 1.01766898  | 0.38584169  | 1311.6070, 1326.4025, 1335.8372,      |
|       | C | 1.28047519  | -0.61611846 | -0.22502560 | 1367.5111, 1401.6930, 1405.1097,      |
|       | H | 1.27226464  | -0.34516978 | -1.28634742 | 1407.8670, 1413.5587, 1414.1550,      |
|       | H | 1.30467505  | -1.71135027 | -0.19355904 | 1478.7572, 1487.2728, 1497.5589,      |
|       | C | 2.53788303  | -0.05897831 | 0.43058045  | 1498.0698, 1503.7517, 1503.8320,      |
|       | H | 2.49236230  | 1.03208589  | 0.40799481  | 1512.4799, 1512.9333, 1697.5813,      |
|       | H | 2.54677586  | -0.34649621 | 1.48493644  | 3020.6955, 3024.5587, 3047.4966,      |

|       |             |             |             |                                  |                                       |
|-------|-------------|-------------|-------------|----------------------------------|---------------------------------------|
|       | C           | 3.81227417  | -0.54437556 | -0.24689085                      | 3049.9607, 3053.4054, 3054.5655,      |
|       | H           | 3.83289788  | -0.24309907 | -1.29527347                      | 3057.7672, 3058.0743, 3068.1973,      |
|       | H           | 3.88069938  | -1.63281756 | -0.21474471                      | 3091.2772, 3092.3346, 3123.5916,      |
|       | H           | 4.70121898  | -0.13861532 | 0.23433708                       | 3123.7492, 3133.2117, 3133.3356,      |
|       | O           | 0.00122757  | 2.42273615  | -0.14459281                      | 3781.2950                             |
|       | H           | -0.03745875 | 2.16392672  | -1.07937815                      |                                       |
| SP4_3 | C           | -3.11897880 | 0.48263925  | 0.28091154                       | 702.7703i, 54.1792, 73.5841, 90.6933, |
|       | H           | -3.14580304 | 0.98224555  | -0.69150704                      | 115.8662, 126.8158, 134.7544,         |
|       | H           | -4.13141164 | 0.49909117  | 0.68223371                       | 154.8231, 186.3707, 250.1135,         |
|       | H           | -2.49031148 | 1.06764878  | 0.95317400                       | 271.7384, 318.3808, 361.4882,         |
|       | C           | -1.22534613 | -1.03639598 | -0.51306243                      | 394.0430, 494.8499, 645.7859,         |
|       | H           | -0.95938155 | -2.09104734 | -0.63515069                      | 707.6138, 757.4931, 777.3368,         |
|       | H           | -1.26085015 | -0.61336428 | -1.52221344                      | 849.6010, 885.1481, 921.4972,         |
|       | C           | -2.60401357 | -0.94475539 | 0.13546638                       | 928.8622, 986.3991, 1035.3957,        |
|       | H           | -2.56547599 | -1.41688546 | 1.12036426                       | 1062.9473, 1084.9246, 1097.0933,      |
|       | H           | -3.31352385 | -1.52456133 | -0.45725063                      | 1113.5874, 1149.3399, 1180.8218,      |
|       | C           | -0.11537387 | -0.35699304 | 0.26733850                       | 1224.8670, 1255.1116, 1272.4610,      |
|       | H           | -0.18917619 | -0.57277682 | 1.33827202                       | 1289.5101, 1307.9656, 1332.8294,      |
|       | H           | -0.24012655 | 0.78551214  | 0.20038207                       | 1345.7594, 1369.9467, 1378.8153,      |
|       | C           | 1.27960923  | -0.63093974 | -0.25759539                      | 1396.7000, 1408.4750, 1411.9378,      |
|       | H           | 1.31821137  | -0.36304490 | -1.31771206                      | 1415.7391, 1475.4023, 1484.6809,      |
|       | H           | 1.47653060  | -1.70774887 | -0.20139756                      | 1495.9916, 1497.3204, 1504.8495,      |
|       | C           | 2.36408876  | 0.12743171  | 0.49674210                       | 1507.9074, 1511.9120, 1520.8257,      |
|       | H           | 2.14946285  | 1.19629647  | 0.43808630                       | 1661.2202, 3024.0145, 3032.4272,      |
| H     | 2.31925735  | -0.14259793 | 1.55510944  | 3042.8812, 3048.9593, 3051.3312, |                                       |
| C     | 3.75710904  | -0.15611532 | -0.04901179 | 3053.3704, 3056.4934, 3068.0788, |                                       |
| H     | 3.82674532  | 0.13304264  | -1.09854054 | 3074.8640, 3091.0072, 3095.8480, |                                       |
| H     | 3.99360701  | -1.21925424 | 0.01781262  | 3116.3047, 3124.2936, 3131.4989, |                                       |
| H     | 4.52176762  | 0.39211114  | 0.49997316  | 3133.9270, 3784.5498             |                                       |
| O     | -0.26580912 | 2.18999331  | -0.31163601 |                                  |                                       |
| H     | -1.20561670 | 2.16615781  | -0.55328101 |                                  |                                       |
| SP4_4 | C           | 3.30671244  | -0.56626079 | 0.64874521                       | 490.2542i, 56.7728, 70.8431, 77.4543, |
|       | H           | 3.50597020  | -1.56040714 | 0.24602841                       | 90.5940, 106.6770, 148.9495,          |
|       | H           | 4.24155065  | -0.00717399 | 0.63871353                       | 153.9416, 212.7131, 247.4027,         |
|       | H           | 2.99906814  | -0.68585206 | 1.68834127                       | 283.1898, 299.8317, 380.8855,         |
|       | C           | 0.90488970  | -0.62595342 | -0.15625104                      | 403.0925, 482.5238, 641.9337,         |
|       | H           | 1.06275032  | -1.63082424 | -0.56655591                      | 742.6487, 775.6690, 815.2912,         |
|       | H           | 0.57256356  | -0.76534891 | 0.87583909                       | 848.9820, 860.4989, 919.9575,         |
|       | C           | 2.22284616  | 0.13793300  | -0.15655713                      | 953.7924, 976.1206, 1032.8874,        |
|       | H           | 2.04788651  | 1.13636973  | 0.25204457                       | 1038.8886, 1073.5180, 1092.7990,      |
|       | H           | 2.55878432  | 0.27441915  | -1.18805109                      | 1118.1165, 1162.3312, 1178.0841,      |
|       | C           | -0.18142940 | 0.06510912  | -0.95798958                      | 1203.6931, 1252.2358, 1265.5542,      |
|       | H           | 0.18994954  | 0.33666284  | -1.94933110                      | 1290.5838, 1295.3173, 1309.9513,      |
|       | H           | -0.39624318 | 1.06855859  | -0.44298671                      | 1334.4577, 1361.2450, 1374.6651,      |
|       | C           | -1.49981539 | -0.68524232 | -1.07722481                      | 1390.3927, 1407.2746, 1414.0536,      |
|       | H           | -1.33641885 | -1.56106846 | -1.71370347                      | 1420.5616, 1475.1580, 1481.5787,      |
|       | H           | -2.21963650 | -0.05117800 | -1.60058374                      | 1495.5994, 1497.7448, 1503.4090,      |
|       | C           | -2.10203503 | -1.13498996 | 0.25264262                       | 1505.3030, 1511.1520, 1513.3625,      |
|       | H           | -3.04202241 | -1.65045044 | 0.04779786                       | 1725.6635, 3020.8277, 3034.0844,      |
| H     | -1.44795512 | -1.87352584 | 0.72142101  | 3046.3013, 3057.0125, 3057.4795, |                                       |
| C     | -2.35170738 | 0.01933183  | 1.21657486  | 3061.9447, 3065.9297, 3074.6027, |                                       |
| H     | -2.96091232 | 0.79244412  | 0.74573033  | 3077.0993, 3090.2343, 3094.8124, |                                       |
| H     | -1.42057734 | 0.49320006  | 1.52757432  | 3124.0103, 3129.2792, 3133.2127, |                                       |
| H     | -2.86932710 | -0.32293061 | 2.11193771  | 3136.8024, 3783.5074             |                                       |
| O     | -0.43135334 | 2.48613377  | 0.07244333  |                                  |                                       |
| H     | 0.16862978  | 2.85847028  | -0.59340358 |                                  |                                       |
| SP4_5 | C           | -3.42371453 | -0.98685344 | -0.51678907                      | 486.4546i, 50.2432, 52.0972, 62.4641, |
|       | H           | -3.42300197 | -1.98817608 | -0.08359055                      | 67.9615, 98.7531, 101.3189, 138.1186, |



|       |   |             |             |             |                                       |
|-------|---|-------------|-------------|-------------|---------------------------------------|
|       | H | -4.43911099 | -0.59689897 | -0.45711498 | 205.3233, 239.6157, 245.5886,         |
|       | H | -3.16299938 | -1.08243871 | -1.57158479 | 278.1723, 311.0616, 405.3714,         |
|       | C | -1.00408193 | -0.60958293 | 0.13373481  | 506.8354, 656.3427, 738.0813,         |
|       | H | -0.95773055 | -1.60899805 | 0.58297322  | 742.8796, 812.1865, 853.4574,         |
|       | H | -0.71871624 | -0.72776089 | -0.91422896 | 869.4497, 919.2031, 949.8407,         |
|       | C | -2.43193555 | -0.08346032 | 0.20376477  | 992.9400, 1031.6279, 1060.9229,       |
|       | H | -2.45655971 | 0.91767108  | -0.23405395 | 1073.5778, 1093.4989, 1111.9837,      |
|       | H | -2.72421662 | 0.02507021  | 1.25165396  | 1163.3962, 1192.2529, 1217.0358,      |
|       | C | -0.00850257 | 0.29301619  | 0.83762355  | 1267.5457, 1275.5299, 1284.3830,      |
|       | H | -0.36163072 | 0.54351911  | 1.84108927  | 1317.1583, 1330.3269, 1333.9607,      |
|       | H | 0.00084215  | 1.28154115  | 0.26000998  | 1364.9040, 1383.5297, 1402.0773,      |
|       | C | 1.42917614  | -0.19649669 | 0.87433600  | 1405.9363, 1413.3329, 1414.3995,      |
|       | H | 1.47248769  | -1.12924320 | 1.44861934  | 1478.7826, 1480.5069, 1495.8169,      |
|       | H | 2.03847649  | 0.52889123  | 1.41913962  | 1497.1204, 1503.7998, 1503.9932,      |
|       | C | 2.04281778  | -0.42186319 | -0.50349321 | 1510.6067, 1511.6929, 1675.2015,      |
|       | H | 1.51141612  | -1.22498726 | -1.01732857 | 3020.8203, 3024.5703, 3045.9866,      |
|       | H | 1.90133813  | 0.48097009  | -1.10316900 | 3054.5933, 3057.3706, 3057.9659,      |
|       | C | 3.52378447  | -0.76747072 | -0.42031728 | 3063.8924, 3072.6003, 3075.5740,      |
|       | H | 3.67944092  | -1.66932568 | 0.17401397  | 3091.0921, 3098.0254, 3123.7796,      |
|       | H | 4.08427494  | 0.04043514  | 0.05191148  | 3124.1141, 3132.3628, 3133.5735,      |
|       | H | 3.95130322  | -0.93949546 | -1.40734340 | 3779.8407                             |
|       | O | -0.07348081 | 2.58992565  | -0.50853090 |                                       |
|       | H | -0.57302985 | 3.06608771  | 0.17409326  |                                       |
|       | C | -3.43177915 | -0.86864328 | -0.58894792 | 608.7781i, 57.0744, 64.1779, 71.1127, |
|       | H | -3.41418517 | -1.92826063 | -0.32964446 | 88.2891, 101.8189, 140.6647,          |
|       | H | -4.45075595 | -0.50800765 | -0.45462368 | 157.4851, 202.5031, 239.4301,         |
|       | H | -3.18432207 | -0.78432442 | -1.64822946 | 249.9033, 261.7343, 310.4889,         |
|       | C | -1.01026368 | -0.57694393 | 0.09872922  | 406.3624, 516.9392, 644.2392,         |
|       | H | -0.94849629 | -1.63159218 | 0.39242624  | 738.9674, 749.7197, 817.9866,         |
|       | H | -0.73860527 | -0.54474798 | -0.96079508 | 851.6579, 868.6898, 917.5883,         |
|       | C | -2.44306509 | -0.08456029 | 0.26326227  | 937.9480, 988.8229, 1031.3251,        |
|       | H | -2.48433044 | 0.97677380  | 0.00645570  | 1059.6510, 1073.2099, 1094.1436,      |
|       | H | -2.72465718 | -0.15571809 | 1.31671933  | 1111.1302, 1162.3279, 1174.9779,      |
|       | C | -0.01296718 | 0.22175373  | 0.91729162  | 1214.8266, 1270.7418, 1271.7795,      |
|       | H | -0.36539068 | 0.32886503  | 1.94627849  | 1281.7507, 1317.8937, 1329.2849,      |
|       | H | -0.02079324 | 1.30398609  | 0.52564971  | 1331.8010, 1367.2881, 1398.5516,      |
|       | C | 1.42269117  | -0.27121867 | 0.88441835  | 1407.0237, 1413.2260, 1414.1522,      |
|       | H | 1.45979850  | -1.27383091 | 1.32634863  | 1418.0697, 1479.6462, 1484.8272,      |
|       | H | 2.03502039  | 0.36932685  | 1.52343044  | 1496.1108, 1498.1234, 1504.1898,      |
|       | C | 2.04304286  | -0.31723806 | -0.50786303 | 1504.3857, 1510.3243, 1513.3969,      |
|       | H | 1.49164812  | -1.01901009 | -1.13673117 | 1651.2877, 3021.3768, 3024.8076,      |
|       | H | 1.94443270  | 0.66925391  | -0.96944386 | 3049.2240, 3051.9997, 3056.3957,      |
|       | C | 3.51125875  | -0.72093035 | -0.46735316 | 3058.1375, 3058.8078, 3073.0192,      |
|       | H | 3.62960655  | -1.70626363 | -0.01413246 | 3076.3436, 3089.8214, 3095.1594,      |
|       | H | 4.09085664  | -0.01223051 | 0.12537219  | 3123.1635, 3125.4284, 3133.7529,      |
|       | H | 3.94534760  | -0.75733265 | -1.46573627 | 3134.5930, 3778.8678                  |
|       | O | -0.07170364 | 2.53887286  | -0.32625696 |                                       |
|       | H | -0.16505116 | 2.06881538  | -1.17051275 |                                       |
| SP4_6 | C | 3.32978492  | -0.45949652 | 0.68209176  | 553.9667i, 51.9132, 69.6885, 76.1345, |
|       | H | 3.53509503  | -1.48447187 | 0.36914900  | 123.1812, 131.6262, 154.7402,         |
|       | H | 4.26366708  | 0.09901757  | 0.63229747  | 172.7710, 222.3045, 248.8406,         |
|       | H | 3.01352890  | -0.48952772 | 1.72574041  | 281.4193, 321.8434, 377.2870,         |
|       | C | 0.93891863  | -0.59797940 | -0.14215736 | 401.7064, 507.6379, 665.2807,         |
|       | H | 1.09850500  | -1.62714751 | -0.48717487 | 735.6475, 764.8637, 799.6833,         |
|       | H | 0.60741044  | -0.67367138 | 0.89739062  | 845.8847, 860.6661, 920.4363,         |
|       | C | 2.25340882  | 0.17074187  | -0.19121642 | 944.4145, 966.8930, 1033.7318,        |
|       | H | 2.06861572  | 1.19989447  | 0.12448853  | 1047.0130, 1073.7675, 1096.2988,      |
|       | H | 2.59928514  | 0.22158447  | -1.22664472 |                                       |
| SP4_7 | C | 3.32978492  | -0.45949652 | 0.68209176  | 553.9667i, 51.9132, 69.6885, 76.1345, |
|       | H | 3.53509503  | -1.48447187 | 0.36914900  | 123.1812, 131.6262, 154.7402,         |
|       | H | 4.26366708  | 0.09901757  | 0.63229747  | 172.7710, 222.3045, 248.8406,         |
|       | H | 3.01352890  | -0.48952772 | 1.72574041  | 281.4193, 321.8434, 377.2870,         |
|       | C | 0.93891863  | -0.59797940 | -0.14215736 | 401.7064, 507.6379, 665.2807,         |
|       | H | 1.09850500  | -1.62714751 | -0.48717487 | 735.6475, 764.8637, 799.6833,         |
|       | H | 0.60741044  | -0.67367138 | 0.89739062  | 845.8847, 860.6661, 920.4363,         |
|       | C | 2.25340882  | 0.17074187  | -0.19121642 | 944.4145, 966.8930, 1033.7318,        |
|       | H | 2.06861572  | 1.19989447  | 0.12448853  | 1047.0130, 1073.7675, 1096.2988,      |
|       | H | 2.59928514  | 0.22158447  | -1.22664472 |                                       |

|       |   |             |             |             |                                       |
|-------|---|-------------|-------------|-------------|---------------------------------------|
|       | C | -0.14573950 | 0.04198382  | -0.98667165 | 1124.3649, 1163.9933, 1170.9712,      |
|       | H | 0.22775337  | 0.25935872  | -1.99006800 | 1219.6770, 1239.0058, 1274.4634,      |
|       | H | -0.31754794 | 1.09662059  | -0.56059599 | 1279.9491, 1290.4648, 1309.1204,      |
|       | C | -1.46157153 | -0.71647730 | -1.07201851 | 1334.9288, 1364.5047, 1377.9713,      |
|       | H | -1.30129833 | -1.59911992 | -1.69916311 | 1392.2426, 1408.6428, 1411.5324,      |
|       | H | -2.19497782 | -0.09847356 | -1.59710191 | 1413.1511, 1475.8555, 1482.0313,      |
|       | C | -2.04619140 | -1.16708214 | 0.26552334  | 1496.2193, 1502.3212, 1503.5838,      |
|       | H | -2.97187999 | -1.71153453 | 0.07208200  | 1506.8290, 1511.2124, 1522.1793,      |
|       | H | -1.36849050 | -1.87894133 | 0.74101345  | 1636.7208, 3018.0803, 3036.0252,      |
|       | C | -2.32794998 | -0.01663243 | 1.22458003  | 3043.7315, 3052.2785, 3056.6004,      |
|       | H | -2.98033690 | 0.72440071  | 0.75450279  | 3059.7994, 3066.1092, 3074.9757,      |
|       | H | -1.40662803 | 0.48113617  | 1.53050318  | 3080.1414, 3092.8325, 3095.0197,      |
|       | H | -2.82805027 | -0.36638408 | 2.12674530  | 3116.3878, 3123.3752, 3132.6881,      |
|       | O | -0.48816054 | 2.49646360  | -0.04860397 | 3133.3905, 3782.3060                  |
|       | H | -1.38332622 | 2.34520312  | 0.29488042  |                                       |
|       | C | -3.73369767 | -0.63663217 | -0.17975478 | 468.0661i, 54.8086, 61.8200, 66.2552, |
|       | H | -3.79706876 | -0.54468201 | -1.26484598 | 71.5692, 94.6934, 126.8196, 147.8879, |
|       | H | -4.29569150 | -1.52209661 | 0.11517334  | 212.4304, 244.4813, 248.3003,         |
|       | H | -4.22546987 | 0.23456727  | 0.25478814  | 284.2087, 310.3108, 404.8203,         |
|       | C | -1.47991265 | 0.51184358  | -0.15225691 | 512.3059, 622.3684, 739.7578,         |
|       | H | -1.46359458 | 0.57306473  | -1.24412328 | 745.1235, 818.9144, 854.8745,         |
|       | H | -1.99421238 | 1.40861378  | 0.20123066  | 883.7699, 918.5554, 954.8542,         |
|       | C | -2.28084031 | -0.71911183 | 0.27034308  | 989.8860, 1045.3597, 1057.2924,       |
|       | H | -2.23409653 | -0.82149852 | 1.35798141  | 1074.5188, 1090.0918, 1110.9645,      |
|       | H | -1.82045785 | -1.61700570 | -0.14604827 | 1161.4101, 1193.4742, 1219.4882,      |
|       | C | -0.05442965 | 0.51418931  | 0.37116032  | 1249.5221, 1286.1135, 1295.2236,      |
|       | H | -0.04130158 | 0.53889972  | 1.46493878  | 1320.2500, 1326.3249, 1331.0923,      |
|       | H | 0.41012979  | 1.50811481  | 0.04056613  | 1339.4903, 1373.5149, 1392.6034,      |
|       | C | 0.84292084  | -0.59207694 | -0.15034790 | 1403.5967, 1412.2398, 1413.6659,      |
|       | H | 0.78518028  | -0.61879403 | -1.24286343 | 1481.3504, 1486.0082, 1497.1006,      |
|       | H | 0.46920012  | -1.55855095 | 0.20380014  | 1497.9120, 1503.1010, 1503.9812,      |
|       | C | 2.29662719  | -0.43478224 | 0.27900488  | 1511.7091, 1512.5511, 1679.1572,      |
|       | H | 2.67241247  | 0.51902015  | -0.09838911 | 3029.8457, 3043.1925, 3045.6790,      |
|       | H | 2.34265232  | -0.38112112 | 1.37042153  | 3052.2609, 3054.6429, 3057.4794,      |
|       | C | 3.17867293  | -1.57260280 | -0.21732198 | 3058.3509, 3067.6234, 3079.2127,      |
|       | H | 3.15993848  | -1.62822145 | -1.30654573 | 3090.5825, 3099.0705, 3124.1143,      |
|       | H | 2.83105856  | -2.53180740 | 0.16903073  | 3126.3917, 3132.7298, 3132.9461,      |
|       | H | 4.21472480  | -1.44204878 | 0.09281420  | 3783.8687                             |
|       | O | 1.10194996  | 2.82231103  | -0.23881629 |                                       |
|       | H | 1.55495256  | 2.88009635  | 0.61764085  |                                       |
| SP4_8 | C | -3.66318717 | -0.72532891 | -0.26671054 | 639.7445i, 53.4279, 64.3782, 69.1810, |
|       | H | -3.70685201 | -0.47421579 | -1.32746665 | 72.9702, 93.9268, 127.9353, 130.4730, |
|       | H | -4.19880565 | -1.66283264 | -0.12262972 | 206.9791, 238.5169, 247.3229,         |
|       | H | -4.19618357 | 0.05370520  | 0.27994240  | 257.0971, 309.2581, 407.2112,         |
|       | C | -1.45166886 | 0.47719236  | -0.00451033 | 503.4625, 646.0710, 730.1065,         |
|       | H | -1.41936304 | 0.69985890  | -1.07663323 | 744.3509, 787.9233, 855.3374,         |
|       | H | -2.00727896 | 1.29085120  | 0.47000464  | 885.0185, 918.8022, 930.8385,         |
|       | C | -2.21857354 | -0.82735370 | 0.20491622  | 987.8966, 1046.9109, 1059.1886,       |
|       | H | -2.19113985 | -1.09037320 | 1.26564247  | 1075.3573, 1094.7260, 1116.3002,      |
|       | H | -1.71600041 | -1.63598852 | -0.32860726 | 1146.8167, 1185.8974, 1232.5163,      |
|       | C | -0.03662102 | 0.44566947  | 0.54500085  | 1256.2861, 1281.9579, 1294.9214,      |
|       | H | -0.04032608 | 0.30425378  | 1.62992648  | 1322.7406, 1330.9780, 1333.6315,      |
|       | H | 0.42530900  | 1.48813404  | 0.40915350  | 1375.3284, 1388.2381, 1392.6087,      |
|       | C | 0.90859021  | -0.52930125 | -0.12955900 | 1408.6897, 1413.1102, 1414.0891,      |
|       | H | 0.86823090  | -0.37569022 | -1.21286674 | 1479.4740, 1485.6302, 1496.6880,      |
|       | H | 0.56874087  | -1.55436676 | 0.05193160  | 1497.4033, 1504.0620, 1504.2136,      |
|       | C | 2.34798126  | -0.38623417 | 0.34997272  | 1511.3553, 1512.1912, 1699.7002,      |
|       | H | 2.67946877  | 0.63718998  | 0.16250269  |                                       |
| SP4_9 | C | -3.66318717 | -0.72532891 | -0.26671054 | 639.7445i, 53.4279, 64.3782, 69.1810, |
|       | H | -3.70685201 | -0.47421579 | -1.32746665 | 72.9702, 93.9268, 127.9353, 130.4730, |
|       | H | -4.19880565 | -1.66283264 | -0.12262972 | 206.9791, 238.5169, 247.3229,         |
|       | H | -4.19618357 | 0.05370520  | 0.27994240  | 257.0971, 309.2581, 407.2112,         |
|       | C | -1.45166886 | 0.47719236  | -0.00451033 | 503.4625, 646.0710, 730.1065,         |
|       | H | -1.41936304 | 0.69985890  | -1.07663323 | 744.3509, 787.9233, 855.3374,         |
|       | H | -2.00727896 | 1.29085120  | 0.47000464  | 885.0185, 918.8022, 930.8385,         |
|       | C | -2.21857354 | -0.82735370 | 0.20491622  | 987.8966, 1046.9109, 1059.1886,       |
|       | H | -2.19113985 | -1.09037320 | 1.26564247  | 1075.3573, 1094.7260, 1116.3002,      |
|       | H | -1.71600041 | -1.63598852 | -0.32860726 | 1146.8167, 1185.8974, 1232.5163,      |
|       | C | -0.03662102 | 0.44566947  | 0.54500085  | 1256.2861, 1281.9579, 1294.9214,      |
|       | H | -0.04032608 | 0.30425378  | 1.62992648  | 1322.7406, 1330.9780, 1333.6315,      |
|       | H | 0.42530900  | 1.48813404  | 0.40915350  | 1375.3284, 1388.2381, 1392.6087,      |
|       | C | 0.90859021  | -0.52930125 | -0.12955900 | 1408.6897, 1413.1102, 1414.0891,      |
|       | H | 0.86823090  | -0.37569022 | -1.21286674 | 1479.4740, 1485.6302, 1496.6880,      |
|       | H | 0.56874087  | -1.55436676 | 0.05193160  | 1497.4033, 1504.0620, 1504.2136,      |
|       | C | 2.34798126  | -0.38623417 | 0.34997272  | 1511.3553, 1512.1912, 1699.7002,      |
|       | H | 2.67946877  | 0.63718998  | 0.16250269  |                                       |

|        |            |             |             |                                  |                                       |
|--------|------------|-------------|-------------|----------------------------------|---------------------------------------|
|        | H          | 2.37929342  | -0.53026957 | 1.43309169                       | 3027.8462, 3029.2854, 3052.1775,      |
|        | C          | 3.28799086  | -1.37313236 | -0.32888631                      | 3053.8259, 3054.4070, 3057.3920,      |
|        | H          | 3.28642392  | -1.22742690 | -1.41004369                      | 3058.0202, 3063.5622, 3075.2144,      |
|        | H          | 2.98152703  | -2.40189666 | -0.13325618                      | 3093.9774, 3096.3246, 3123.7718,      |
|        | H          | 4.31256471  | -1.25657007 | 0.02213738                       | 3125.6773, 3133.4645, 3133.6014,      |
|        | O          | 0.85947817  | 2.79187377  | -0.20110654                      | 3784.3552                             |
|        | H          | 0.05149524  | 2.91157851  | -0.72531868                      |                                       |
| SP4_10 | C          | -3.26963461 | -0.76819325 | -0.50286614                      | 603.6182i, 52.0024, 60.4924, 73.9409, |
|        | H          | -3.01709818 | -0.87027079 | -1.55932285                      | 84.3895, 102.7793, 121.2351,          |
|        | H          | -3.84722006 | -1.64430697 | -0.21065881                      | 202.3535, 209.4593, 243.6509,         |
|        | H          | -3.91149996 | 0.10758467  | -0.39931062                      | 257.1230, 273.2774, 310.9230,         |
|        | C          | -1.18311934 | 0.59684731  | -0.06852144                      | 419.3191, 525.1569, 651.5531,         |
|        | H          | -0.86210054 | 0.47201845  | -1.10721001                      | 726.3591, 752.7405, 796.2837,         |
|        | H          | -1.82156926 | 1.48406157  | -0.04566773                      | 853.4242, 888.2910, 896.6606,         |
|        | C          | -2.01037586 | -0.61992088 | 0.34067758                       | 935.1849, 969.7615, 1051.0891,        |
|        | H          | -2.27690229 | -0.53289139 | 1.39736010                       | 1062.2518, 1068.4628, 1074.2432,      |
|        | H          | -1.40044828 | -1.52153166 | 0.24959052                       | 1127.0077, 1148.9252, 1168.9703,      |
|        | C          | 0.02473575  | 0.83219871  | 0.82395864                       | 1228.7602, 1256.7855, 1281.3779,      |
|        | H          | -0.29186804 | 1.13682285  | 1.82425304                       | 1303.7290, 1325.1873, 1326.7190,      |
|        | H          | 0.58941176  | 1.74857522  | 0.42492915                       | 1331.0974, 1372.2237, 1387.2685,      |
|        | C          | 1.03351988  | -0.30269365 | 0.89762139                       | 1402.1998, 1407.4412, 1412.8888,      |
|        | H          | 0.58835376  | -1.14960209 | 1.43135819                       | 1413.5958, 1482.5658, 1490.7983,      |
|        | H          | 1.88306466  | 0.02250564  | 1.50279439                       | 1492.9937, 1500.4902, 1503.4217,      |
|        | C          | 1.54056311  | -0.77218934 | -0.46097997                      | 1504.1292, 1509.7807, 1515.4509,      |
|        | H          | 0.71437187  | -1.19491162 | -1.03799482                      | 1677.9520, 3031.0443, 3038.7941,      |
|        | H          | 1.90275612  | 0.09501673  | -1.01934537                      | 3048.9676, 3053.5160, 3057.3790,      |
|        | C          | 2.64805709  | -1.80972917 | -0.33160857                      | 3058.2836, 3065.7988, 3072.6421,      |
| H      | 2.29914811 | -2.68284147 | 0.22216526  | 3080.7047, 3089.6357, 3094.9095, |                                       |
| H      | 3.50308790 | -1.39751282 | 0.20553432  | 3123.6928, 3124.8201, 3132.9838, |                                       |
| H      | 2.99630297 | -2.14896003 | -1.30640955 | 3134.0313, 3784.0548             |                                       |
| O      | 1.21084834 | 2.80292120  | -0.44938498 |                                  |                                       |
| H      | 0.56294666 | 2.71495575  | -1.16667429 |                                  |                                       |
| SP4_11 | C          | -3.34215568 | -0.00142239 | -0.61149222                      | 472.3042i, 37.2136, 67.3873, 82.6836, |
|        | H          | -3.09606570 | -0.44536640 | -1.57710323                      | 101.5999, 108.9710, 123.4123,         |
|        | H          | -4.21498565 | -0.52012343 | -0.21662856                      | 189.4101, 225.6009, 254.3907,         |
|        | H          | -3.61972239 | 1.03863965  | -0.78750242                      | 290.3176, 323.4926, 360.6389,         |
|        | C          | -0.92396736 | 0.62389655  | -0.20756072                      | 431.6846, 509.9921, 630.6164,         |
|        | H          | -0.62837718 | 0.15925969  | -1.15190063                      | 744.3780, 770.7150, 807.8724,         |
|        | H          | -1.18777171 | 1.65702984  | -0.44670268                      | 848.0587, 880.9265, 889.7773,         |
|        | C          | -2.15686917 | -0.09235758 | 0.34065838                       | 951.3216, 972.7755, 1033.6670,        |
|        | H          | -2.42263791 | 0.33996851  | 1.30921756                       | 1050.3550, 1059.0956, 1069.8016,      |
|        | H          | -1.91717527 | -1.14159206 | 0.52680430                       | 1120.3774, 1162.2856, 1168.9245,      |
|        | C          | 0.24828339  | 0.62162896  | 0.75943774                       | 1198.5424, 1252.1854, 1271.9957,      |
|        | H          | 0.01267604  | 1.21349807  | 1.64725581                       | 1297.9344, 1312.2648, 1320.3219,      |
|        | H          | 1.10860301  | 1.17972400  | 0.24963101                       | 1327.5086, 1363.7849, 1377.5245,      |
|        | C          | 0.77603206  | -0.74743558 | 1.16985429                       | 1386.4771, 1402.1920, 1412.3034,      |
|        | H          | 0.04613317  | -1.21875860 | 1.83494399                       | 1421.6233, 1479.6997, 1484.8559,      |
|        | H          | 1.68341453  | -0.60706632 | 1.76232628                       | 1495.3339, 1500.9711, 1503.0390,      |
|        | C          | 1.07964014  | -1.68461343 | 0.00310878                       | 1505.7015, 1511.0890, 1514.6941,      |
|        | H          | 1.44060428  | -2.63246564 | 0.40626225                       | 1736.8485, 3041.3827, 3046.5287,      |
|        | H          | 0.15613657  | -1.91647570 | -0.53369285                      | 3052.7257, 3056.7268, 3059.0413,      |
|        | C          | 2.10992877  | -1.11639096 | -0.96668258                      | 3062.1937, 3067.7539, 3077.8248,      |
| H      | 3.02327761 | -0.83620113 | -0.43962435 | 3081.5717, 3090.8137, 3099.2659, |                                       |
| H      | 1.74231559 | -0.21976903 | -1.46556668 | 3126.0610, 3128.8758, 3132.8200, |                                       |
| H      | 2.37018812 | -1.84503809 | -1.73358399 | 3137.8130, 3787.0163             |                                       |
| O      | 2.11568727 | 2.15690367  | -0.31520823 |                                  |                                       |
| H      | 1.83253573 | 2.91967390  | 0.21358794  |                                  |                                       |
| SP4_12 | C          | 2.71331507  | -1.26109944 | -0.64133469                      | 628.5997i, 49.7882, 62.8322, 73.9252, |

|        |   |             |             |             |                                        |
|--------|---|-------------|-------------|-------------|----------------------------------------|
|        | H | 3.21522932  | -0.59816728 | -1.34846713 | 78.4698, 113.0941, 131.3603,           |
|        | H | 3.37794274  | -2.09958439 | -0.43762377 | 146.5705, 195.9223, 247.3085,          |
|        | H | 1.82413029  | -1.65674637 | -1.13331601 | 249.5590, 286.9055, 385.4012,          |
|        | C | 1.53610037  | 0.75192774  | 0.39065611  | 404.7825, 484.6244, 648.9613,          |
|        | H | 1.30031237  | 1.21247114  | 1.35456486  | 721.8087, 746.7168, 798.5993,          |
|        | H | 2.14981168  | 1.46684773  | -0.16423517 | 860.0890, 867.0155, 919.5350,          |
|        | C | 2.35643798  | -0.51678373 | 0.63965411  | 932.9264, 972.3056, 1033.4353,         |
|        | H | 1.80560416  | -1.18046099 | 1.30920095  | 1047.2286, 1075.2463, 1094.8816,       |
|        | H | 3.27035243  | -0.23950450 | 1.16768152  | 1122.9684, 1148.0402, 1177.0667,       |
|        | C | 0.24136309  | 0.51120722  | -0.36870767 | 1229.6240, 1251.2526, 1282.2109,       |
|        | H | 0.42946998  | 0.22717999  | -1.40731397 | 1293.2057, 1308.4265, 1332.8611,       |
|        | H | -0.30768100 | 1.51490220  | -0.46230471 | 1362.1678, 1372.3152, 1383.6697,       |
|        | C | -0.73058828 | -0.44568402 | 0.29248193  | 1391.2960, 1408.6604, 1413.8077,       |
|        | H | -0.87425229 | -0.14771772 | 1.33618179  | 1416.6792, 1478.2639, 1488.2707,       |
|        | H | -0.29442842 | -1.45087440 | 0.31496683  | 1496.9914, 1497.5872, 1503.8092,       |
|        | C | -2.08058828 | -0.50044368 | -0.41211752 | 1505.3447, 1510.6778, 1512.4321,       |
|        | H | -2.50900314 | 0.50389467  | -0.42697183 | 1691.2648, 3024.1044, 3037.8750,       |
|        | H | -1.92727497 | -0.78867378 | -1.45539800 | 3050.4818, 3055.2636, 3056.2680,       |
|        | C | -3.04597938 | -1.47095106 | 0.25460537  | 3058.3574, 3061.2740, 3071.3809,       |
|        | H | -3.22829011 | -1.18389595 | 1.29116072  | 3083.1604, 3093.4212, 3096.0378,       |
|        | H | -2.64057307 | -2.48397837 | 0.25825796  | 3123.5254, 3124.1936, 3133.5334,       |
|        | H | -4.00645955 | -1.49660703 | -0.25859069 | 3133.6134, 3783.8337                   |
|        | O | -0.92046613 | 2.85221177  | -0.15348756 |                                        |
|        | H | -0.16152486 | 3.17418278  | 0.35868125  |                                        |
|        | C | -3.35309843 | -0.01883651 | -0.61874760 |                                        |
|        | H | -3.09623527 | -0.50495432 | -1.56104096 | 535.7680i, 47.6466, 68.5845, 105.2395, |
|        | H | -4.22419505 | -0.52648939 | -0.20609411 | 119.3080, 131.7162, 158.1589,          |
|        | H | -3.63807660 | 1.00940261  | -0.84465282 | 191.4686, 243.2475, 279.0250,          |
|        | C | -0.94526649 | 0.65289230  | -0.22510552 | 291.8252, 324.6104, 354.8589,          |
|        | H | -0.64688796 | 0.15961811  | -1.15438715 | 424.0680, 529.1581, 659.2432,          |
|        | H | -1.21517336 | 1.67586086  | -0.49621494 | 742.0180, 758.2091, 795.5170,          |
|        | C | -2.17419652 | -0.05426869 | 0.34493952  | 837.4266, 879.5713, 892.4579,          |
|        | H | -2.45171367 | 0.41822609  | 1.29090166  | 947.3212, 955.8243, 1037.6794,         |
|        | H | -1.92514285 | -1.09166063 | 0.58011143  | 1053.9812, 1063.1735, 1071.1390,       |
|        | C | 0.22184868  | 0.69165752  | 0.74586714  | 1125.9057, 1154.6544, 1172.7926,       |
|        | H | -0.02823168 | 1.29552513  | 1.62102500  | 1214.0426, 1250.4107, 1263.0947,       |
|        | H | 1.05499184  | 1.31020756  | 0.25274163  | 1285.8167, 1308.0388, 1323.5197,       |
|        | C | 0.77203117  | -0.65807090 | 1.18863353  | 1327.7651, 1367.3314, 1380.6942,       |
|        | H | 0.06414480  | -1.10719252 | 1.89134629  | 1389.2149, 1403.0772, 1410.3730,       |
|        | H | 1.69302678  | -0.49253558 | 1.75417823  | 1412.6162, 1480.8068, 1485.3531,       |
|        | C | 1.04389939  | -1.65165524 | 0.06093485  | 1496.7057, 1502.7373, 1505.4127,       |
|        | H | 1.40131879  | -2.58461359 | 0.49977569  | 1506.2997, 1514.2793, 1521.0678,       |
|        | H | 0.10903070  | -1.89499850 | -0.44938631 | 1633.0165, 3041.0198, 3043.8008,       |
|        | C | 2.06097030  | -1.15196898 | -0.95857529 | 3046.9754, 3055.0359, 3058.2692,       |
|        | H | 2.99992553  | -0.88649211 | -0.46508198 | 3060.8968, 3072.9139, 3076.0532,       |
|        | H | 1.69248239  | -0.27471576 | -1.49217861 | 3082.3077, 3092.2200, 3099.6811,       |
|        | H | 2.28748614  | -1.91696046 | -1.70007688 | 3116.1929, 3125.4925, 3132.6330,       |
|        | O | 2.17536666  | 2.14501779  | -0.28584793 | 3133.3783, 3784.5051                   |
|        | H | 2.76318749  | 1.39313325  | -0.46186246 |                                        |
|        | C | -2.89065365 | -0.84150850 | 0.47838932  |                                        |
|        | H | -3.53356414 | 0.02822773  | 0.62512957  | 599.9195i, 32.3045, 60.1931, 63.5249,  |
|        | H | -3.53046346 | -1.71270216 | 0.34424638  | 80.2171, 104.6899, 117.6116,           |
|        | H | -2.31982607 | -0.98901300 | 1.39556820  | 185.3693, 213.8074, 251.8222,          |
|        | C | -1.14568679 | 0.64395681  | -0.63978382 | 276.1897, 288.2641, 361.8713,          |
|        | H | -0.52516465 | 0.72199736  | -1.53619514 | 425.0327, 531.6681, 652.6837,          |
|        | H | -1.82048482 | 1.50395355  | -0.64872326 | 728.5228, 750.3426, 805.8061,          |
|        | C | -1.97452814 | -0.64015848 | -0.72295327 | 844.8655, 885.3857, 894.7228,          |
|        | H | -1.30644904 | -1.49900373 | -0.82297231 | 938.5042, 961.5102, 1030.1707,         |
| SP4_13 |   |             |             |             |                                        |
| SP4_14 |   |             |             |             |                                        |

|        |   |             |             |             |                                       |
|--------|---|-------------|-------------|-------------|---------------------------------------|
|        | H | -2.57160504 | -0.60928885 | -1.63589555 | 1061.0573, 1065.8057, 1075.9561,      |
|        | C | -0.26432529 | 0.72482391  | 0.59878271  | 1127.0194, 1150.5509, 1166.0062,      |
|        | H | -0.86365169 | 0.88416858  | 1.49707040  | 1221.2024, 1250.5241, 1280.4288,      |
|        | H | 0.36192922  | 1.68427877  | 0.52371258  | 1298.3492, 1317.9468, 1327.4759,      |
|        | C | 0.71315236  | -0.42242990 | 0.79239969  | 1357.2607, 1369.5283, 1382.8775,      |
|        | H | 0.15547043  | -1.34164274 | 1.00686884  | 1404.7321, 1408.9305, 1412.6150,      |
|        | H | 1.31898881  | -0.22283800 | 1.67937239  | 1417.0350, 1476.4868, 1490.6157,      |
|        | C | 1.63624422  | -0.65948093 | -0.39753620 | 1498.0805, 1499.5404, 1504.0394,      |
|        | H | 1.04777129  | -0.95476239 | -1.26940837 | 1505.4930, 1511.4397, 1512.1782,      |
|        | H | 2.12640443  | 0.28340181  | -0.65352841 | 1665.5012, 3025.5453, 3045.8294,      |
|        | C | 2.68080812  | -1.72936899 | -0.10754071 | 3052.5513, 3055.4672, 3057.3951,      |
|        | H | 2.20490766  | -2.67812958 | 0.14574088  | 3059.8018, 3071.9347, 3079.0954,      |
|        | H | 3.30801289  | -1.43853567 | 0.73603429  | 3089.5098, 3091.8669, 3097.9496,      |
|        | H | 3.33037151  | -1.89939057 | -0.96528325 | 3123.8500, 3125.5522, 3132.6938,      |
|        | O | 1.16492541  | 2.86199561  | 0.05032834  | 3134.9639, 3782.8651                  |
|        | H | 0.76788427  | 2.88831059  | -0.83491021 |                                       |
|        | C | -3.03872794 | 0.31122928  | -0.35377879 |                                       |
|        | H | -2.73388636 | 0.65901181  | -1.34218966 | 551.8028i, 43.3580, 60.7012, 70.5718, |
|        | H | -4.12717683 | 0.27359148  | -0.32844411 | 85.0796, 104.0364, 129.0533,          |
|        | H | -2.71156331 | 1.06123414  | 0.36557415  | 138.7587, 232.2449, 238.7105,         |
|        | C | -0.91632343 | -1.08363719 | -0.19447511 | 262.3844, 290.7908, 308.9285,         |
|        | H | -0.54726984 | -2.09927503 | -0.01238295 | 418.8648, 526.3546, 655.8395,         |
|        | H | -0.64554065 | -0.83598176 | -1.22418485 | 735.8737, 764.6704, 781.3196,         |
|        | C | -2.43548250 | -1.05662414 | -0.05384208 | 845.1060, 866.6033, 905.4849,         |
|        | H | -2.70582293 | -1.36364721 | 0.96010112  | 941.5201, 965.5889, 1038.1689,        |
|        | H | -2.86551185 | -1.80069335 | -0.72679230 | 1059.3309, 1071.2349, 1091.0892,      |
|        | C | -0.20102080 | -0.13958060 | 0.75764009  | 1124.2301, 1164.3615, 1169.9533,      |
|        | H | -0.64783471 | -0.18279714 | 1.75459915  | 1227.2917, 1264.9694, 1273.5267,      |
|        | H | -0.41686810 | 0.92891498  | 0.39927222  | 1292.2864, 1310.6995, 1325.6400,      |
|        | C | 1.30653979  | -0.31436131 | 0.83070002  | 1337.2079, 1372.8125, 1376.7973,      |
|        | H | 1.52825111  | -1.29423544 | 1.26829040  | 1399.6503, 1407.3213, 1414.6677,      |
|        | H | 1.72413931  | 0.42463637  | 1.52155737  | 1421.4902, 1479.6557, 1483.9555,      |
|        | C | 2.01477641  | -0.19851017 | -0.51542633 | 1492.0062, 1498.4986, 1504.0683,      |
|        | H | 1.69244214  | -1.01213041 | -1.16772621 | 1504.2984, 1512.0383, 1514.2636,      |
|        | H | 1.70319975  | 0.72826923  | -1.00521378 | 1677.3582, 3024.2925, 3028.1432,      |
|        | C | 3.53055850  | -0.23372665 | -0.37149575 | 3048.1986, 3052.3887, 3056.3358,      |
|        | H | 3.85313558  | -1.16012253 | 0.10620116  | 3057.5036, 3062.3361, 3064.5986,      |
|        | H | 3.88294170  | 0.59434954  | 0.24544822  | 3077.8382, 3089.5550, 3093.9962,      |
|        | H | 4.02721432  | -0.16545765 | -1.33849086 | 3122.2858, 3129.2246, 3134.1851,      |
|        | O | -0.37984372 | 2.36878104  | -0.05488279 | 3139.4394, 3780.5233                  |
|        | H | 0.46698016  | 2.58534939  | 0.36751093  |                                       |
|        | C | -2.75231752 | 0.54261732  | -0.40948728 |                                       |
|        | H | -2.33929775 | 0.93828031  | -1.33903556 | 572.6667i, 42.8705, 76.8320, 89.9839, |
|        | H | -3.83755867 | 0.62354678  | -0.45972955 | 115.1326, 131.1320, 154.7235,         |
|        | H | -2.40307058 | 1.18678801  | 0.39637232  | 195.6586, 234.0533, 255.5672,         |
|        | C | -0.80784549 | -1.09410933 | -0.24921256 | 298.8944, 315.9431, 354.1180,         |
|        | H | -0.56862893 | -2.15652299 | -0.12597909 | 438.8311, 516.9881, 663.0867,         |
|        | H | -0.44022598 | -0.81185898 | -1.24025883 | 727.3448, 776.0397, 796.2234,         |
|        | C | -2.32098172 | -0.90433666 | -0.19936060 | 839.7843, 852.9590, 907.4161,         |
|        | H | -2.69197358 | -1.26150224 | 0.76505335  | 949.2671, 955.8954, 1017.2289,        |
|        | H | -2.78037660 | -1.53768046 | -0.96052998 | 1046.4464, 1068.3064, 1093.9416,      |
|        | C | -0.05799770 | -0.31358815 | 0.81706426  | 1113.7801, 1142.8881, 1156.9279,      |
|        | H | -0.58536185 | -0.36161611 | 1.77322364  | 1181.0994, 1247.5999, 1264.1881,      |
|        | H | -0.12537048 | 0.80660674  | 0.55567855  | 1296.9290, 1303.8330, 1321.4974,      |
|        | C | 1.39993143  | -0.70933554 | 1.00423711  | 1353.1416, 1376.7402, 1378.8969,      |
|        | H | 1.42110150  | -1.68775875 | 1.49421256  | 1388.4695, 1407.3814, 1411.0603,      |
|        | H | 1.87543955  | -0.01024130 | 1.69818665  | 1421.0556, 1474.4085, 1482.8901,      |
|        | C | 2.22361197  | -0.78981416 | -0.27997563 | 1491.1507, 1498.5866, 1503.1183,      |
| SP4_15 |   |             |             |             |                                       |
| SP4_16 |   |             |             |             |                                       |

|        |            |             |             |                                  |                                       |
|--------|------------|-------------|-------------|----------------------------------|---------------------------------------|
|        | H          | 3.22635979  | -1.13822635 | -0.02707365                      | 1506.5450, 1510.1304, 1517.3893,      |
|        | H          | 1.79638072  | -1.54726429 | -0.94022283                      | 1639.1886, 3025.4906, 3035.4909,      |
|        | C          | 2.32381222  | 0.53508986  | -1.02628634                      | 3043.6173, 3047.3545, 3060.6124,      |
|        | H          | 2.76430831  | 1.30491094  | -0.38659539                      | 3061.6805, 3065.0469, 3074.1970,      |
|        | H          | 1.34513162  | 0.88584512  | -1.35621248                      | 3076.8719, 3089.2168, 3094.6253,      |
|        | H          | 2.95809384  | 0.44506622  | -1.90721506                      | 3116.5095, 3128.0058, 3134.8961,      |
|        | O          | -0.07000455 | 2.29668578  | 0.46647913                       | 3142.4667, 3784.2937                  |
|        | H          | 0.89580636  | 2.34900103  | 0.38641849                       |                                       |
| SP4_17 | C          | -3.06910251 | 0.09483396  | 0.37319232                       | 487.4575i, 46.1565, 75.3450, 92.8705, |
|        | H          | -3.33076596 | 1.14537748  | 0.23357356                       | 95.1860, 121.0296, 130.8562,          |
|        | H          | -3.99061154 | -0.48551640 | 0.35082112                       | 200.1792, 210.4996, 260.8025,         |
|        | H          | -2.63850868 | -0.00950834 | 1.36957868                       | 322.5095, 336.4629, 386.2997,         |
|        | C          | -0.84350738 | 0.50260535  | -0.80663286                      | 442.1371, 516.2322, 632.0786,         |
|        | H          | -0.20418977 | 0.12468416  | -1.60715046                      | 744.6781, 773.7550, 815.8519,         |
|        | H          | -1.13496801 | 1.51484891  | -1.09754649                      | 833.6288, 880.1982, 885.4906,         |
|        | C          | -2.09829815 | -0.36917271 | -0.70637363                      | 950.9716, 977.8037, 1010.2135,        |
|        | H          | -1.81005673 | -1.40586534 | -0.51759781                      | 1041.7424, 1057.9206, 1075.3250,      |
|        | H          | -2.60096198 | -0.36321585 | -1.67504354                      | 1113.3217, 1159.3803, 1165.6326,      |
|        | C          | -0.04554759 | 0.57420573  | 0.48662445                       | 1187.9789, 1243.3936, 1264.5412,      |
|        | H          | -0.58489985 | 1.13752511  | 1.25056377                       | 1292.9558, 1304.2095, 1320.4026,      |
|        | H          | 0.88761516  | 1.20302728  | 0.26801256                       | 1349.3263, 1367.8575, 1378.9481,      |
|        | C          | 0.42332542  | -0.75969296 | 1.05162947                       | 1381.8464, 1401.8201, 1414.6466,      |
|        | H          | -0.44924657 | -1.30520581 | 1.42617595                       | 1420.5789, 1475.5131, 1485.4689,      |
|        | H          | 1.05938905  | -0.56767408 | 1.91908256                       | 1497.6645, 1498.9219, 1503.5738,      |
|        | C          | 1.18202291  | -1.63890530 | 0.05926247                       | 1506.9008, 1510.6506, 1513.9947,      |
|        | H          | 1.45947017  | -2.56673345 | 0.56271150                       | 1736.9511, 3035.7913, 3054.0286,      |
|        | H          | 0.52017153  | -1.92587355 | -0.76147024                      | 3056.2175, 3058.2508, 3060.9589,      |
| C      | 2.43163521 | -0.96774605 | -0.50001459 | 3062.2461, 3076.6449, 3079.2572, |                                       |
| H      | 3.08171838 | -0.62638121 | 0.30712513  | 3091.5042, 3092.0218, 3101.8810, |                                       |
| H      | 2.18457400 | -0.09357544 | -1.10214262 | 3124.5179, 3128.9366, 3133.7515, |                                       |
| H      | 2.99933133 | -1.65636275 | -1.12477441 | 3138.3831, 3784.9686             |                                       |
| O      | 1.91007329 | 2.28120290  | 0.00982907  |                                  |                                       |
| H      | 1.38818567 | 3.01405793  | 0.37332244  |                                  |                                       |
| SP4_18 | C          | -3.39273364 | -0.53944246 | -0.41673989                      | 476.4659i, 43.0619, 55.1384, 60.4685, |
|        | H          | -3.18631181 | -0.77940722 | -1.46069993                      | 77.7604, 80.9496, 115.2837, 201.9667, |
|        | H          | -4.03239128 | -1.32322425 | -0.01253994                      | 208.2246, 247.1358, 258.2840,         |
|        | H          | -3.95334315 | 0.39596090  | -0.39759201                      | 303.6469, 309.6537, 425.0863,         |
|        | C          | -1.18397965 | 0.67383412  | -0.19813670                      | 514.5583, 634.6661, 732.4347,         |
|        | H          | -0.90480556 | 0.40751663  | -1.22042060                      | 749.9635, 814.3276, 854.9004,         |
|        | H          | -1.74171778 | 1.61050841  | -0.26791644                      | 887.3404, 892.4839, 955.9772,         |
|        | C          | -2.09651607 | -0.41035277 | 0.37253281                       | 971.8488, 1038.3227, 1052.9458,       |
|        | H          | -2.31806592 | -0.18153340 | 1.41859253                       | 1065.6856, 1069.8689, 1118.0970,      |
|        | H          | -1.57066021 | -1.36785253 | 0.37093249                       | 1165.6184, 1170.7652, 1211.7915,      |
|        | C          | 0.06670594  | 0.90272631  | 0.63600435                       | 1254.1674, 1275.3441, 1310.2677,      |
|        | H          | -0.19008565 | 1.35959592  | 1.59475674                       | 1317.5454, 1326.4147, 1329.1675,      |
|        | H          | 0.69075913  | 1.68276921  | 0.07732152                       | 1372.3623, 1380.5809, 1393.1908,      |
|        | C          | 0.96873361  | -0.30405134 | 0.84077643                       | 1406.2273, 1411.9655, 1412.8060,      |
|        | H          | 0.46102975  | -1.03661127 | 1.47749606                       | 1481.1820, 1490.5018, 1491.8663,      |
|        | H          | 1.85789906  | 0.01206583  | 1.39228489                       | 1500.2972, 1503.2303, 1503.9377,      |
|        | C          | 1.40340871  | -0.97369798 | -0.45759369                      | 1509.2769, 1514.5944, 1704.1557,      |
|        | H          | 0.53016122  | -1.38148886 | -0.97229230                      | 3031.8661, 3046.5567, 3051.0422,      |
|        | H          | 1.82998241  | -0.21480829 | -1.11834321                      | 3056.0982, 3057.4279, 3059.9276,      |
|        | C          | 2.41462348  | -2.08695249 | -0.21774503                      | 3066.9810, 3071.9924, 3079.6180,      |
| H      | 1.99970857 | -2.85415128 | 0.43810848  | 3090.4634, 3100.7802, 3122.7832, |                                       |
| H      | 3.31461751 | -1.69605880 | 0.25871705  | 3125.7908, 3132.4906, 3132.8404, |                                       |
| H      | 2.71068262 | -2.56767825 | -1.14933006 | 3785.1203                        |                                       |
| O      | 1.69911221 | 2.65070917  | -0.51131819 |                                  |                                       |
| H      | 1.82818912 | 3.15634360  | 0.30688061  |                                  |                                       |

|        |             |             |             |             |                                                                                                                                                                                                                                                                                                                                                                                                                                                                                                                                                                                                                                                                                                                                                             |
|--------|-------------|-------------|-------------|-------------|-------------------------------------------------------------------------------------------------------------------------------------------------------------------------------------------------------------------------------------------------------------------------------------------------------------------------------------------------------------------------------------------------------------------------------------------------------------------------------------------------------------------------------------------------------------------------------------------------------------------------------------------------------------------------------------------------------------------------------------------------------------|
| SP4_19 | C           | -3.09455790 | 0.13907967  | 0.37762819  | 541.4549i, 56.4732, 82.6041, 95.1819, 117.6571, 145.7677, 168.4803, 199.1524, 236.2895, 291.2080, 322.2329, 330.5853, 382.4670, 442.6549, 530.9427, 660.0489, 740.9187, 751.2393, 801.4326, 831.1154, 881.8321, 886.9136, 946.7923, 955.9731, 1011.5075, 1053.3089, 1063.7696, 1075.1789, 1118.9256, 1155.6817, 1171.0564, 1199.5511, 1239.7733, 1251.9160, 1288.4500, 1301.0119, 1310.5760, 1353.9107, 1365.5438, 1382.0341, 1386.7599, 1403.5224, 1410.4747, 1416.5861, 1476.3026, 1485.6457, 1497.8480, 1501.9192, 1506.0921, 1509.7328, 1510.9722, 1521.1108, 1639.6609, 3035.3927, 3043.6865, 3056.2419, 3057.5761, 3060.2806, 3062.7875, 3073.7979, 3085.6166, 3091.1903, 3094.0170, 3104.1336, 3116.9839, 3126.2480, 3133.6257, 3134.1518, 3784.5097 |
|        | H           | -3.35952380 | 1.18017389  | 0.18523716  |                                                                                                                                                                                                                                                                                                                                                                                                                                                                                                                                                                                                                                                                                                                                                             |
|        | H           | -4.01380325 | -0.44521539 | 0.38662285  |                                                                                                                                                                                                                                                                                                                                                                                                                                                                                                                                                                                                                                                                                                                                                             |
|        | H           | -2.66172923 | 0.08758953  | 1.37709793  |                                                                                                                                                                                                                                                                                                                                                                                                                                                                                                                                                                                                                                                                                                                                                             |
|        | C           | -0.87511154 | 0.49716119  | -0.83121468 |                                                                                                                                                                                                                                                                                                                                                                                                                                                                                                                                                                                                                                                                                                                                                             |
|        | H           | -0.24152542 | 0.08414850  | -1.61937704 |                                                                                                                                                                                                                                                                                                                                                                                                                                                                                                                                                                                                                                                                                                                                                             |
|        | H           | -1.17394517 | 1.49291976  | -1.16573475 |                                                                                                                                                                                                                                                                                                                                                                                                                                                                                                                                                                                                                                                                                                                                                             |
|        | C           | -2.12467707 | -0.37606872 | -0.67942045 |                                                                                                                                                                                                                                                                                                                                                                                                                                                                                                                                                                                                                                                                                                                                                             |
|        | H           | -1.83097026 | -1.40015906 | -0.43686891 |                                                                                                                                                                                                                                                                                                                                                                                                                                                                                                                                                                                                                                                                                                                                                             |
|        | H           | -2.63071475 | -0.42371526 | -1.64517972 |                                                                                                                                                                                                                                                                                                                                                                                                                                                                                                                                                                                                                                                                                                                                                             |
|        | C           | -0.07124249 | 0.63550967  | 0.45169261  |                                                                                                                                                                                                                                                                                                                                                                                                                                                                                                                                                                                                                                                                                                                                                             |
|        | H           | -0.61578639 | 1.21824618  | 1.19644289  |                                                                                                                                                                                                                                                                                                                                                                                                                                                                                                                                                                                                                                                                                                                                                             |
|        | H           | 0.81799764  | 1.32465145  | 0.21505285  |                                                                                                                                                                                                                                                                                                                                                                                                                                                                                                                                                                                                                                                                                                                                                             |
|        | C           | 0.42422384  | -0.66458259 | 1.06915600  |                                                                                                                                                                                                                                                                                                                                                                                                                                                                                                                                                                                                                                                                                                                                                             |
|        | H           | -0.43321286 | -1.18816825 | 1.50426477  |                                                                                                                                                                                                                                                                                                                                                                                                                                                                                                                                                                                                                                                                                                                                                             |
|        | H           | 1.08727037  | -0.42697416 | 1.90544581  |                                                                                                                                                                                                                                                                                                                                                                                                                                                                                                                                                                                                                                                                                                                                                             |
|        | C           | 1.14296968  | -1.61140015 | 0.10927700  |                                                                                                                                                                                                                                                                                                                                                                                                                                                                                                                                                                                                                                                                                                                                                             |
|        | H           | 1.41833398  | -2.51483157 | 0.65591095  |                                                                                                                                                                                                                                                                                                                                                                                                                                                                                                                                                                                                                                                                                                                                                             |
|        | H           | 0.45668915  | -1.93004763 | -0.67825539 |                                                                                                                                                                                                                                                                                                                                                                                                                                                                                                                                                                                                                                                                                                                                                             |
|        | C           | 2.38993366  | -1.00537706 | -0.52407830 |                                                                                                                                                                                                                                                                                                                                                                                                                                                                                                                                                                                                                                                                                                                                                             |
| H      | 3.08186231  | -0.65650039 | 0.24743376  |             |                                                                                                                                                                                                                                                                                                                                                                                                                                                                                                                                                                                                                                                                                                                                                             |
| H      | 2.14006933  | -0.16182445 | -1.16887407 |             |                                                                                                                                                                                                                                                                                                                                                                                                                                                                                                                                                                                                                                                                                                                                                             |
| H      | 2.92093729  | -1.73765875 | -1.13085626 |             |                                                                                                                                                                                                                                                                                                                                                                                                                                                                                                                                                                                                                                                                                                                                                             |
| O      | 1.95528547  | 2.27617823  | 0.02617699  |             |                                                                                                                                                                                                                                                                                                                                                                                                                                                                                                                                                                                                                                                                                                                                                             |
| H      | 2.64653828  | 1.60200775  | 0.12397900  |             |                                                                                                                                                                                                                                                                                                                                                                                                                                                                                                                                                                                                                                                                                                                                                             |
| SP4_20 | C           | 3.69988064  | -0.37390942 | 0.01597703  | 612.6892i, 36.0495, 63.5421, 66.3558, 78.4277, 90.6328, 110.8340, 130.3690, 230.2904, 238.6452, 256.3905, 287.4530, 312.1231, 410.8151, 527.3487, 651.9939, 739.2656, 758.4057, 794.2432, 844.5143, 882.4180, 904.7304, 938.3807, 966.5340, 1048.6390, 1055.0450, 1072.0118, 1089.4121, 1120.6675, 1147.5206, 1172.6242, 1229.3037, 1254.9554, 1281.3078, 1304.7489, 1316.5055, 1328.0895, 1346.3717, 1375.3034, 1390.0333, 1391.3333, 1407.0186, 1412.7695, 1415.9112, 1481.7828, 1486.5630, 1494.5901, 1496.9771, 1503.8149, 1504.2094, 1511.6724, 1512.9509, 1681.2081, 3027.7726, 3031.1728, 3052.1305, 3054.7588, 3058.0117, 3059.4388, 3063.2522, 3070.3558, 3085.4000, 3095.2451, 3098.2462, 3125.1326, 3125.4789, 3133.9640, 3135.9947, 3781.8496   |
|        | H           | 3.88149907  | 0.13681855  | 0.96272839  |                                                                                                                                                                                                                                                                                                                                                                                                                                                                                                                                                                                                                                                                                                                                                             |
|        | H           | 4.32353026  | -1.26670831 | -0.00742174 |                                                                                                                                                                                                                                                                                                                                                                                                                                                                                                                                                                                                                                                                                                                                                             |
|        | H           | 4.03027688  | 0.28785762  | -0.78571633 |                                                                                                                                                                                                                                                                                                                                                                                                                                                                                                                                                                                                                                                                                                                                                             |
|        | C           | 1.33628994  | 0.52526821  | -0.09538259 |                                                                                                                                                                                                                                                                                                                                                                                                                                                                                                                                                                                                                                                                                                                                                             |
|        | H           | 1.45222979  | 1.00868094  | 0.88074867  |                                                                                                                                                                                                                                                                                                                                                                                                                                                                                                                                                                                                                                                                                                                                                             |
|        | H           | 1.69144974  | 1.23741826  | -0.84547195 |                                                                                                                                                                                                                                                                                                                                                                                                                                                                                                                                                                                                                                                                                                                                                             |
|        | C           | 2.22407050  | -0.71721995 | -0.13771304 |                                                                                                                                                                                                                                                                                                                                                                                                                                                                                                                                                                                                                                                                                                                                                             |
|        | H           | 2.05989353  | -1.24018125 | -1.08362654 |                                                                                                                                                                                                                                                                                                                                                                                                                                                                                                                                                                                                                                                                                                                                                             |
|        | H           | 1.92362084  | -1.40618004 | 0.65387249  |                                                                                                                                                                                                                                                                                                                                                                                                                                                                                                                                                                                                                                                                                                                                                             |
|        | C           | -0.13231547 | 0.22507066  | -0.33703697 |                                                                                                                                                                                                                                                                                                                                                                                                                                                                                                                                                                                                                                                                                                                                                             |
|        | H           | -0.28399811 | -0.16614370 | -1.34600857 |                                                                                                                                                                                                                                                                                                                                                                                                                                                                                                                                                                                                                                                                                                                                                             |
|        | H           | -0.71022511 | 1.21718340  | -0.34091817 |                                                                                                                                                                                                                                                                                                                                                                                                                                                                                                                                                                                                                                                                                                                                                             |
|        | C           | -0.79186112 | -0.65619105 | 0.70947480  |                                                                                                                                                                                                                                                                                                                                                                                                                                                                                                                                                                                                                                                                                                                                                             |
|        | H           | -0.47683026 | -0.32039721 | 1.70140810  |                                                                                                                                                                                                                                                                                                                                                                                                                                                                                                                                                                                                                                                                                                                                                             |
|        | H           | -0.42590681 | -1.68214655 | 0.59488950  |                                                                                                                                                                                                                                                                                                                                                                                                                                                                                                                                                                                                                                                                                                                                                             |
|        | C           | -2.31728124 | -0.65705071 | 0.63358482  |                                                                                                                                                                                                                                                                                                                                                                                                                                                                                                                                                                                                                                                                                                                                                             |
|        | H           | -2.70877231 | -1.28742351 | 1.43386209  |                                                                                                                                                                                                                                                                                                                                                                                                                                                                                                                                                                                                                                                                                                                                                             |
|        | H           | -2.67705085 | 0.35645147  | 0.82292698  |                                                                                                                                                                                                                                                                                                                                                                                                                                                                                                                                                                                                                                                                                                                                                             |
|        | C           | -2.85304729 | -1.14681388 | -0.70703152 |                                                                                                                                                                                                                                                                                                                                                                                                                                                                                                                                                                                                                                                                                                                                                             |
| H      | -2.44414317 | -2.12841804 | -0.95538637 |             |                                                                                                                                                                                                                                                                                                                                                                                                                                                                                                                                                                                                                                                                                                                                                             |
| H      | -2.59282831 | -0.46141567 | -1.51342645 |             |                                                                                                                                                                                                                                                                                                                                                                                                                                                                                                                                                                                                                                                                                                                                                             |
| H      | -3.93881291 | -1.23172055 | -0.68815679 |             |                                                                                                                                                                                                                                                                                                                                                                                                                                                                                                                                                                                                                                                                                                                                                             |
| O      | -1.21760845 | 2.60182076  | -0.03061673 |             |                                                                                                                                                                                                                                                                                                                                                                                                                                                                                                                                                                                                                                                                                                                                                             |
| H      | -0.35748046 | 2.93683541  | 0.26939540  |             |                                                                                                                                                                                                                                                                                                                                                                                                                                                                                                                                                                                                                                                                                                                                                             |
| SP4_21 | C           | 3.16133803  | -0.25190430 | -0.08945446 | 650.6831i, 38.5189, 55.6289, 75.0974, 90.4505, 105.7036, 136.2900, 148.9621, 228.2324, 244.3460, 256.3965, 287.6450, 296.8280, 401.4506, 526.4576, 654.4788, 727.4903, 743.2064, 783.2886, 849.4760, 883.7393, 903.4351,                                                                                                                                                                                                                                                                                                                                                                                                                                                                                                                                    |
|        | H           | 3.23751403  | 0.25058900  | 0.87586565  |                                                                                                                                                                                                                                                                                                                                                                                                                                                                                                                                                                                                                                                                                                                                                             |
|        | H           | 4.14748160  | -0.63144780 | -0.35479391 |                                                                                                                                                                                                                                                                                                                                                                                                                                                                                                                                                                                                                                                                                                                                                             |
|        | H           | 2.88553316  | 0.50441403  | -0.82330053 |                                                                                                                                                                                                                                                                                                                                                                                                                                                                                                                                                                                                                                                                                                                                                             |
|        | C           | 0.76848936  | -0.94093220 | 0.47290589  |                                                                                                                                                                                                                                                                                                                                                                                                                                                                                                                                                                                                                                                                                                                                                             |
|        | H           | 0.11376294  | -1.81501205 | 0.53102041  |                                                                                                                                                                                                                                                                                                                                                                                                                                                                                                                                                                                                                                                                                                                                                             |
|        | H           | 0.85978125  | -0.55101048 | 1.49158043  |                                                                                                                                                                                                                                                                                                                                                                                                                                                                                                                                                                                                                                                                                                                                                             |
|        | C           | 2.13998273  | -1.38247480 | -0.03215708 |                                                                                                                                                                                                                                                                                                                                                                                                                                                                                                                                                                                                                                                                                                                                                             |

|        |   |             |             |             |                                       |
|--------|---|-------------|-------------|-------------|---------------------------------------|
|        | H | 2.02641721  | -1.82584427 | -1.02515749 | 935.2168, 968.7731, 1044.5244,        |
|        | H | 2.51231539  | -2.17653454 | 0.61769659  | 1056.9813, 1071.4220, 1088.2244,      |
|        | C | 0.10505749  | 0.11504176  | -0.39268514 | 1115.8583, 1141.5123, 1183.5812,      |
|        | H | 0.14856984  | -0.15541629 | -1.45262636 | 1218.8103, 1254.8002, 1285.9688,      |
|        | H | 0.75072533  | 1.06153968  | -0.31818407 | 1296.7811, 1312.4667, 1327.2998,      |
|        | C | -1.30982606 | 0.49201519  | 0.01421745  | 1348.2610, 1371.6441, 1380.3460,      |
|        | H | -1.62251898 | 1.37848332  | -0.54619626 | 1391.5000, 1403.9887, 1412.4554,      |
|        | H | -1.31911264 | 0.76923671  | 1.07359402  | 1421.9239, 1476.3951, 1485.9963,      |
|        | C | -2.33976789 | -0.61078753 | -0.22403277 | 1491.2092, 1496.4387, 1502.3040,      |
|        | H | -2.29188719 | -0.92176918 | -1.27078385 | 1503.3068, 1511.3719, 1511.7435,      |
|        | H | -2.08642289 | -1.48848914 | 0.37254877  | 1716.9763, 3029.3053, 3036.2299,      |
|        | C | -3.75325442 | -0.15640614 | 0.11651643  | 3047.1877, 3052.0258, 3054.4327,      |
|        | H | -4.04359057 | 0.69999212  | -0.49356198 | 3058.1708, 3063.7237, 3066.1261,      |
|        | H | -3.82145016 | 0.14428291  | 1.16293986  | 3079.2898, 3088.4685, 3097.8530,      |
|        | H | -4.48032231 | -0.94986243 | -0.05173410 | 3125.8242, 3131.1995, 3133.9593,      |
|        | O | 1.24760853  | 2.41650654  | 0.09262006  | 3138.7038, 3782.5844                  |
|        | H | 0.37022033  | 2.78748428  | 0.27827038  |                                       |
|        | C | 2.88352236  | -0.78966332 | -0.71278430 | 681.8959i, 44.9725, 57.1094, 87.8950, |
|        | H | 3.03344748  | -0.16161807 | -1.59289714 | 105.1438, 125.7670, 153.6447,         |
|        | H | 3.79876228  | -1.35560339 | -0.54401478 | 182.6112, 224.6620, 271.5146,         |
|        | H | 2.09291154  | -1.50361036 | -0.94813070 | 281.1650, 318.9772, 350.1650,         |
|        | C | 1.33638773  | 0.99245053  | 0.25894145  | 428.9636, 510.1565, 652.0033,         |
|        | H | 1.09309554  | 1.52022902  | 1.18380591  | 722.5674, 753.4250, 792.5839,         |
|        | H | 1.62705547  | 1.75591358  | -0.46626609 | 851.2447, 868.2152, 902.2928,         |
|        | C | 2.52458014  | 0.05746616  | 0.50226745  | 927.8488, 960.7797, 1018.9762,        |
|        | H | 2.31685668  | -0.59325432 | 1.35397569  | 1048.2398, 1073.2391, 1095.6833,      |
|        | H | 3.38388135  | 0.66557324  | 0.78987225  | 1112.7397, 1144.8005, 1170.1151,      |
|        | C | 0.08225253  | 0.29886783  | -0.24925803 | 1218.5122, 1247.2797, 1289.0261,      |
|        | H | 0.21701780  | -0.09638982 | -1.26026426 | 1290.6374, 1306.6641, 1335.0425,      |
|        | H | -0.68084862 | 1.14891233  | -0.38190175 | 1357.7690, 1372.0594, 1381.7172,      |
|        | C | -0.49215795 | -0.75633641 | 0.67740180  | 1386.8054, 1405.1924, 1412.9615,      |
|        | H | -0.80295303 | -0.27884996 | 1.61267405  | 1416.3411, 1479.3014, 1487.0491,      |
|        | H | 0.30363136  | -1.45824428 | 0.94333894  | 1495.3336, 1497.9613, 1504.5422,      |
|        | C | -1.65476563 | -1.54941223 | 0.08490932  | 1506.9457, 1511.6385, 1521.4479,      |
|        | H | -1.30804121 | -2.06726255 | -0.81323404 | 1655.5476, 3033.0532, 3043.2185,      |
|        | H | -1.94958764 | -2.32533531 | 0.79337610  | 3050.9783, 3053.8292, 3055.7788,      |
|        | C | -2.87080904 | -0.69871463 | -0.26316942 | 3061.1543, 3063.3075, 3076.3958,      |
|        | H | -2.64839898 | 0.00700456  | -1.06406970 | 3088.8064, 3090.5497, 3100.9885,      |
|        | H | -3.20983077 | -0.13690180 | 0.61162508  | 3116.9156, 3122.1019, 3132.6808,      |
|        | H | -3.70339261 | -1.31767027 | -0.59497290 | 3134.3335, 3784.2264                  |
|        | O | -1.51361040 | 2.37222583  | -0.18807579 |                                       |
|        | H | -2.30878432 | 1.89135312  | 0.09184015  |                                       |
| SP4_22 |   |             |             |             |                                       |

**Table S2.** Computed energies of all the conformers of the stationary points involved in reactions R1-R4 at the M06-2X/aug-cc-pVTZ and CCSD(T)/aug-cc-pVTZ//M06-2X/aug-cc-pVTZ



levels of theory with their associated T1 diagnostic values provided for the conformers whose energy is below 1 kcal mol<sup>-1</sup> of the corresponding global minimum

| Conformer species | M06-2X/aug-cc-pVTZ (a.u.) | CCSD(T)/aug-cc-pVTZ (a.u.) | T1 diagnostic |
|-------------------|---------------------------|----------------------------|---------------|
| OH                | -75.7338102               | -75.64558432               | 0.01003122    |
| n-heptane_1       | -276.3434533              | -275.8931079               | 0.00856549    |
| n-heptane_2       | -276.3426196              | -275.8922611               | 0.00859211    |
| n-heptane_3       | -276.3426146              | -275.8922912               | 0.00859697    |
| n-heptane_4       | -276.3425076              | -275.8919244               | 0.00863591    |
| n-heptane_5       | -276.3424915              | -275.8919623               | 0.00863738    |
| n-heptane_6       | -276.3423942              | -275.8915877               | 0.00867225    |
| n-heptane_7       | -276.3422352              | -275.8911467               | 0.00870521    |
| n-heptane_8       | -276.3418984              | -275.8912161               | 0.00866703    |
| n-heptane_9       | -276.3418970              | -275.8914695               | 0.00862092    |
| n-heptane_10      | -276.3418223              |                            |               |
| n-heptane_11      | -276.3417331              |                            |               |
| n-heptane_12      | -276.3415217              |                            |               |
| n-heptane_13      | -276.3414424              |                            |               |
| n-heptane_14      | -276.3398265              |                            |               |
| n-heptane_15      | -276.3395971              |                            |               |
| n-heptane_16      | -276.3395555              |                            |               |
| n-heptane_17      | -276.3395412              |                            |               |
| n-heptane_18      | -276.3389862              |                            |               |
| n-heptane_19      | -276.3389114              |                            |               |
| n-heptane_20      | -276.3388698              |                            |               |
| n-heptane_21      | -276.3387555              |                            |               |
| n-heptane_22      | -276.3342010              |                            |               |
| SP1_1             | -352.0732280              | -351.5339891               | 0.014884      |
| SP1_2             | -352.0730307              | -351.5339220               | 0.014844      |
| SP1_3             | -352.0729165              | -351.5330115               | 0.015212      |
| SP1_4             | -352.0725040              | -351.5329163               | 0.015022      |
| SP1_5             | -352.0724867              | -351.5330585               | 0.015134      |
| SP1_6             | -352.0723895              | -351.5331335               | 0.014900      |
| SP1_7             | -352.0723875              | -351.5331449               | 0.014897      |
| SP1_8             | -352.0723787              | -351.5331313               | 0.014906      |
| SP1_9             | -352.0723707              | -351.5331795               | 0.014902      |
| SP1_10            | -352.0723677              | -351.5332564               | 0.014907      |
| SP1_11            | -352.0723203              | -351.5333274               | 0.014880      |
| SP1_12            | -352.0722969              | -351.5333003               | 0.014892      |
| SP1_13            | -352.0722379              | -351.5331209               | 0.014874      |
| SP1_14            | -352.0722268              | -351.5331979               | 0.014866      |
| SP1_15            | -352.0722130              | -351.5331373               | 0.014864      |
| SP1_16            | -352.0721930              | -351.5330630               | 0.014861      |
| SP1_17            | -352.0720907              | -351.5327737               | 0.014883      |
| SP1_18            | -352.0720872              | -351.5327909               | 0.014895      |
| SP1_19            | -352.0719916              | -351.5320522               | 0.015205      |
| SP1_20            | -352.0719908              | -351.5320490               | 0.015179      |
| SP1_21            | -352.0718994              | -351.5322067               | 0.015086      |
| SP1_22            | -352.0718005              | -351.5315036               | 0.015215      |
| SP1_23            | -352.0717658              | -351.5320972               | 0.015073      |
| SP1_24            | -352.0716881              | -351.5317988               | 0.015053      |
| SP1_25            | -352.0716624              | -351.5320407               | 0.015024      |
| SP1_26            | -352.0715386              |                            |               |
| SP1_27            | -352.0715371              |                            |               |
| SP1_28            | -352.0715241              |                            |               |

|        |              |              |          |
|--------|--------------|--------------|----------|
| SP1_29 | -352.0715153 |              |          |
| SP1_30 | -352.0714966 |              |          |
| SP1_31 | -352.0714911 |              |          |
| SP1_32 | -352.0714763 |              |          |
| SP1_33 | -352.0713661 |              |          |
| SP1_34 | -352.0713633 |              |          |
| SP1_35 | -352.0713595 |              |          |
| SP1_36 | -352.0713571 |              |          |
| SP1_37 | -352.0712773 |              |          |
| SP1_38 | -352.0708026 |              |          |
| SP1_39 | -352.0706655 |              |          |
| SP1_40 | -352.0703639 |              |          |
| SP1_41 | -352.0703242 |              |          |
| SP1_42 | -352.0703059 |              |          |
| SP2_1  | -352.0756664 | -351.5370173 | 0.014911 |
| SP2_2  | -352.0756601 | -351.5361257 | 0.015322 |
| SP2_3  | -352.0756597 | -351.5361150 | 0.015321 |
| SP2_4  | -352.0756062 | -351.5370213 | 0.014855 |
| SP2_5  | -352.0755877 | -351.5367620 | 0.014954 |
| SP2_6  | -352.0749655 | -351.5353118 | 0.015253 |
| SP2_7  | -352.0748378 | -351.5355807 | 0.015166 |
| SP2_8  | -352.0748307 | -351.5361661 | 0.014940 |
| SP2_9  | -352.0748161 | -351.5362111 | 0.014935 |
| SP2_10 | -352.0748141 | -351.5361648 | 0.014927 |
| SP2_11 | -352.0748141 | -351.5361294 | 0.014992 |
| SP2_12 | -352.0747996 | -351.5362316 | 0.014934 |
| SP2_13 | -352.0747736 | -351.5359636 | 0.014971 |
| SP2_14 | -352.0747736 | -351.5359632 | 0.014971 |
| SP2_15 | -352.0747670 | -351.5359854 | 0.014966 |
| SP2_16 | -352.0747633 | -351.5359370 | 0.014967 |
| SP2_17 | -352.0747178 | -351.5359503 | 0.014981 |
| SP2_18 | -352.0747019 | -351.5358416 | 0.014959 |
| SP2_19 | -352.0746473 | -351.5355940 | 0.014990 |
| SP2_20 | -352.0746362 | -351.5360589 | 0.014898 |
| SP2_21 | -352.0743720 | -351.5355867 | 0.014970 |
| SP2_22 | -352.0742784 | -351.5358223 | 0.014885 |
| SP2_23 | -352.0741451 | -351.5347812 | 0.015166 |
| SP2_24 | -352.0740814 | -351.5349327 | 0.014983 |
| SP2_25 | -352.0737586 |              |          |
| SP2_26 | -352.0737030 |              |          |
| SP2_27 | -352.0736788 |              |          |
| SP2_28 | -352.0736444 |              |          |
| SP2_29 | -352.0735953 |              |          |
| SP2_30 | -352.0735760 |              |          |
| SP3_1  | -352.0763550 | -351.5378167 | 0.014995 |
| SP3_2  | -352.0758637 | -351.5364675 | 0.015420 |
| SP3_3  | -352.0757075 | -351.5367384 | 0.015211 |
| SP3_4  | -352.0756914 | -351.5370370 | 0.015127 |
| SP3_5  | -352.0756004 | -351.5366493 | 0.015134 |
| SP3_6  | -352.0755516 | -351.5369720 | 0.015020 |
| SP3_7  | -352.0755082 | -351.5357771 | 0.015514 |
| SP3_8  | -352.0754908 | -351.5369593 | 0.015011 |
| SP3_9  | -352.0754114 | -351.5368837 | 0.014995 |
| SP3_10 | -352.0753963 | -351.5357998 | 0.015410 |
| SP3_11 | -352.0753873 | -351.5368862 | 0.014995 |
| SP3_12 | -352.0753661 | -351.5361827 | 0.015262 |

|        |              |              |            |
|--------|--------------|--------------|------------|
| SP3_13 | -352.0753289 | -351.5362656 | 0.015160   |
| SP3_14 | -352.0751149 | -351.5365935 | 0.015089   |
| SP3_15 | -352.0750939 | -351.5364041 | 0.015080   |
| SP3_16 | -352.0750271 | -351.5365339 | 0.015027   |
| SP3_17 | -352.0749427 | -351.5359718 | 0.015117   |
| SP3_18 | -352.0749011 | -351.5350043 | 0.015427   |
| SP3_19 | -352.0748824 | -351.5360720 | 0.015055   |
| SP3_20 | -352.0748372 | -351.5355104 | 0.015230   |
| SP3_21 | -352.0747307 |              |            |
| SP3_22 | -352.0746027 |              |            |
| SP3_23 | -352.0745289 |              |            |
| SP3_24 | -352.0744558 |              |            |
| SP3_25 | -352.0743532 |              |            |
| SP3_26 | -352.0742770 |              |            |
| SP3_27 | -352.0742379 |              |            |
| SP3_28 | -352.0741487 |              |            |
| SP3_29 | -352.0741193 |              |            |
| SP3_30 | -352.0740857 |              |            |
| SP3_31 | -352.0740635 |              |            |
| SP4_1  | -352.0763276 | -351.5378410 | 0.01499552 |
| SP4_2  | -352.0760624 | -351.5371616 | 0.01507263 |
| SP4_3  | -352.0759582 | -351.5366945 | 0.01530522 |
| SP4_4  | -352.0756856 | -351.5366599 | 0.0152121  |
| SP4_5  | -352.0753854 | -351.5369317 | 0.01499584 |
| SP4_6  | -352.0753185 | -351.5363511 | 0.01516265 |
| SP4_7  | -352.0753101 | -351.5360418 | 0.01526247 |
| SP4_8  | -352.0750852 | -351.5366402 | 0.01507784 |
| SP4_9  | -352.0750801 | -351.5364536 | 0.01508074 |
| SP4_10 | -352.0750323 | -351.5361423 | 0.01512009 |
| SP4_11 | -352.0749985 | -351.5360145 | 0.01515575 |
| SP4_12 | -352.0748772 | -351.5360859 | 0.01505795 |
| SP4_13 | -352.0748678 | -351.5355057 | 0.01526785 |
| SP4_14 | -352.0748575 | -351.5357304 | 0.0151051  |
| SP4_15 | -352.0748284 | -351.5357934 | 0.01518201 |
| SP4_16 | -352.0747824 | -351.5350702 | 0.01539813 |
| SP4_17 | -352.0747763 | -351.5355048 | 0.01516426 |
| SP4_18 | -352.0747655 | -351.5362379 | 0.01505391 |
| SP4_19 | -352.0745459 |              |            |
| SP4_20 | -352.0744227 |              |            |
| SP4_21 | -352.0742420 |              |            |
| SP4_22 | -352.0740296 |              |            |

**Table S3.** Site-specific rate constants obtained with the SS-HO-LL approach

| T (K) | k (cm <sup>3</sup> molecule <sup>-1</sup> s <sup>-1</sup> ) |          |          |          |
|-------|-------------------------------------------------------------|----------|----------|----------|
|       | R1                                                          | R2       | R3       | R4       |
| 200   | 1.30E-14                                                    | 2.62E-13 | 5.87E-13 | 4.28E-13 |
| 298   | 5.63E-14                                                    | 4.71E-13 | 1.04E-12 | 6.70E-13 |
| 400   | 1.58E-13                                                    | 7.65E-13 | 1.70E-12 | 9.96E-13 |
| 500   | 3.29E-13                                                    | 1.15E-12 | 2.53E-12 | 1.41E-12 |
| 600   | 5.83E-13                                                    | 1.63E-12 | 3.58E-12 | 1.93E-12 |
| 700   | 9.32E-13                                                    | 2.25E-12 | 4.86E-12 | 2.57E-12 |
| 800   | 1.39E-12                                                    | 3.00E-12 | 6.40E-12 | 3.35E-12 |
| 900   | 1.97E-12                                                    | 3.91E-12 | 8.20E-12 | 4.28E-12 |
| 1000  | 2.38E-12                                                    | 4.99E-12 | 1.03E-11 | 5.38E-12 |
| 1100  | 3.16E-12                                                    | 6.25E-12 | 1.27E-11 | 6.67E-12 |
| 1200  | 4.09E-12                                                    | 7.72E-12 | 1.54E-11 | 8.14E-12 |
| 1300  | 5.18E-12                                                    | 9.39E-12 | 1.85E-11 | 9.82E-12 |
| 1400  | 6.45E-12                                                    | 1.13E-11 | 2.19E-11 | 1.17E-11 |
| 1500  | 7.91E-12                                                    | 1.34E-11 | 2.56E-11 | 1.38E-11 |
| 1600  | 9.56E-12                                                    | 1.58E-11 | 2.98E-11 | 1.62E-11 |
| 1800  | 1.35E-11                                                    | 2.13E-11 | 3.93E-11 | 2.16E-11 |
| 2000  | 1.83E-11                                                    | 2.80E-11 | 5.04E-11 | 2.81E-11 |
| 2200  | 2.41E-11                                                    | 3.58E-11 | 6.33E-11 | 3.57E-11 |
| 2500  | 3.47E-11                                                    | 4.99E-11 | 8.62E-11 | 4.94E-11 |
| 2800  | 4.79E-11                                                    | 6.70E-11 | 1.13E-10 | 6.59E-11 |
| 3000  | 5.82E-11                                                    | 8.01E-11 | 1.34E-10 | 7.85E-11 |

**Table S4.** Site-specific rate constants obtained with the SS-HO-HL approach

| T (K) | k (cm <sup>3</sup> molecule <sup>-1</sup> s <sup>-1</sup> ) |          |          |          |
|-------|-------------------------------------------------------------|----------|----------|----------|
|       | R1                                                          | R2       | R3       | R4       |
| 200   | 5.84E-15                                                    | 2.36E-13 | 5.83E-13 | 4.30E-13 |
| 298   | 3.30E-14                                                    | 4.35E-13 | 1.04E-12 | 6.72E-13 |
| 400   | 1.04E-13                                                    | 7.19E-13 | 1.69E-12 | 9.99E-13 |
| 500   | 2.33E-13                                                    | 1.09E-12 | 2.52E-12 | 1.41E-12 |
| 600   | 4.35E-13                                                    | 1.56E-12 | 3.57E-12 | 1.93E-12 |
| 700   | 7.23E-13                                                    | 2.16E-12 | 4.85E-12 | 2.57E-12 |
| 800   | 1.11E-12                                                    | 2.90E-12 | 6.38E-12 | 3.35E-12 |
| 900   | 1.42E-12                                                    | 3.79E-12 | 8.18E-12 | 4.29E-12 |
| 1000  | 1.99E-12                                                    | 4.85E-12 | 1.03E-11 | 5.39E-12 |
| 1100  | 2.68E-12                                                    | 6.10E-12 | 1.27E-11 | 6.67E-12 |
| 1200  | 3.52E-12                                                    | 7.54E-12 | 1.54E-11 | 8.15E-12 |
| 1300  | 4.52E-12                                                    | 9.19E-12 | 1.84E-11 | 9.83E-12 |
| 1400  | 5.68E-12                                                    | 1.11E-11 | 2.18E-11 | 1.17E-11 |
| 1500  | 7.01E-12                                                    | 1.32E-11 | 2.56E-11 | 1.38E-11 |
| 1600  | 8.54E-12                                                    | 1.55E-11 | 2.97E-11 | 1.62E-11 |
| 1800  | 1.22E-11                                                    | 2.10E-11 | 3.92E-11 | 2.16E-11 |
| 2000  | 1.67E-11                                                    | 2.76E-11 | 5.04E-11 | 2.81E-11 |
| 2200  | 2.22E-11                                                    | 3.53E-11 | 6.33E-11 | 3.57E-11 |
| 2500  | 3.23E-11                                                    | 4.93E-11 | 8.61E-11 | 4.94E-11 |
| 2800  | 4.49E-11                                                    | 6.63E-11 | 1.13E-10 | 6.59E-11 |
| 3000  | 5.48E-11                                                    | 7.94E-11 | 1.34E-10 | 7.86E-11 |

**Table S5.** Site-specific rate constants obtained with the MS-T-HL approach

| T (K) | k (cm <sup>3</sup> molecule <sup>-1</sup> s <sup>-1</sup> ) |          |          |          |
|-------|-------------------------------------------------------------|----------|----------|----------|
|       | R1                                                          | R2       | R3       | R4       |
| 200   | 1.97E-14                                                    | 1.61E-12 | 1.46E-12 | 3.51E-13 |
| 298   | 8.44E-14                                                    | 2.15E-12 | 2.02E-12 | 3.82E-13 |
| 400   | 2.06E-13                                                    | 2.85E-12 | 2.75E-12 | 4.50E-13 |
| 500   | 3.70E-13                                                    | 3.66E-12 | 3.60E-12 | 5.43E-13 |
| 600   | 5.67E-13                                                    | 4.58E-12 | 4.55E-12 | 6.60E-13 |
| 700   | 7.93E-13                                                    | 5.63E-12 | 5.61E-12 | 8.03E-13 |
| 800   | 1.04E-12                                                    | 6.80E-12 | 6.78E-12 | 9.72E-13 |
| 900   | 1.17E-12                                                    | 8.10E-12 | 8.05E-12 | 1.17E-12 |
| 1000  | 1.45E-12                                                    | 9.52E-12 | 9.43E-12 | 1.40E-12 |
| 1100  | 1.76E-12                                                    | 1.11E-11 | 1.09E-11 | 1.65E-12 |
| 1200  | 2.09E-12                                                    | 1.27E-11 | 1.25E-11 | 1.94E-12 |
| 1300  | 2.46E-12                                                    | 1.45E-11 | 1.41E-11 | 2.26E-12 |
| 1400  | 2.85E-12                                                    | 1.65E-11 | 1.59E-11 | 2.61E-12 |
| 1500  | 3.28E-12                                                    | 1.85E-11 | 1.77E-11 | 2.99E-12 |
| 1600  | 3.74E-12                                                    | 2.07E-11 | 1.96E-11 | 3.40E-12 |
| 1800  | 4.75E-12                                                    | 2.53E-11 | 2.37E-11 | 4.32E-12 |
| 2000  | 5.90E-12                                                    | 3.04E-11 | 2.81E-11 | 5.37E-12 |
| 2200  | 7.20E-12                                                    | 3.59E-11 | 3.28E-11 | 6.54E-12 |
| 2500  | 9.42E-12                                                    | 4.49E-11 | 4.02E-11 | 8.52E-12 |
| 2800  | 1.20E-11                                                    | 5.47E-11 | 4.82E-11 | 1.08E-11 |
| 3000  | 1.39E-11                                                    | 6.17E-11 | 5.37E-11 | 1.24E-11 |

**Table S6.** Site-specific rate constants obtained with the MS-T-HL\_0.5 approach

| T (K) | k (cm <sup>3</sup> molecule <sup>-1</sup> s <sup>-1</sup> ) |          |          |          |
|-------|-------------------------------------------------------------|----------|----------|----------|
|       | R1                                                          | R2       | R3       | R4       |
| 200   | 1.92E-14                                                    | 1.53E-12 | 1.42E-12 | 3.25E-13 |
| 298   | 8.30E-14                                                    | 2.09E-12 | 1.97E-12 | 3.63E-13 |
| 400   | 2.04E-13                                                    | 2.80E-12 | 2.71E-12 | 4.34E-13 |
| 500   | 3.67E-13                                                    | 3.61E-12 | 3.55E-12 | 5.28E-13 |
| 600   | 5.64E-13                                                    | 4.54E-12 | 4.51E-12 | 6.45E-13 |
| 700   | 7.89E-13                                                    | 5.59E-12 | 5.57E-12 | 7.87E-13 |
| 800   | 1.04E-12                                                    | 6.76E-12 | 6.73E-12 | 9.56E-13 |
| 900   | 1.17E-12                                                    | 8.06E-12 | 8.00E-12 | 1.15E-12 |
| 1000  | 1.45E-12                                                    | 9.48E-12 | 9.37E-12 | 1.38E-12 |
| 1100  | 1.75E-12                                                    | 1.10E-11 | 1.08E-11 | 1.63E-12 |
| 1200  | 2.09E-12                                                    | 1.27E-11 | 1.24E-11 | 1.92E-12 |
| 1300  | 2.45E-12                                                    | 1.45E-11 | 1.41E-11 | 2.24E-12 |
| 1400  | 2.85E-12                                                    | 1.64E-11 | 1.58E-11 | 2.59E-12 |
| 1500  | 3.27E-12                                                    | 1.85E-11 | 1.77E-11 | 2.96E-12 |
| 1600  | 3.73E-12                                                    | 2.06E-11 | 1.96E-11 | 3.38E-12 |
| 1800  | 4.74E-12                                                    | 2.53E-11 | 2.36E-11 | 4.29E-12 |
| 2000  | 5.90E-12                                                    | 3.03E-11 | 2.80E-11 | 5.34E-12 |
| 2200  | 7.19E-12                                                    | 3.58E-11 | 3.26E-11 | 6.50E-12 |
| 2500  | 9.41E-12                                                    | 4.48E-11 | 4.01E-11 | 8.48E-12 |
| 2800  | 1.20E-11                                                    | 5.46E-11 | 4.80E-11 | 1.07E-11 |
| 3000  | 1.39E-11                                                    | 6.15E-11 | 5.36E-11 | 1.24E-11 |

**Table S7.** Site-specific rate constants obtained with the MS-T-HL\_1.0 approach

| T (K) | k (cm <sup>3</sup> molecule <sup>-1</sup> s <sup>-1</sup> ) |          |          |          |
|-------|-------------------------------------------------------------|----------|----------|----------|
|       | R1                                                          | R2       | R3       | R4       |
| 200   | 2.11E-14                                                    | 1.58E-12 | 1.46E-12 | 3.22E-13 |
| 298   | 8.87E-14                                                    | 2.14E-12 | 2.02E-12 | 3.53E-13 |
| 400   | 2.14E-13                                                    | 2.86E-12 | 2.76E-12 | 4.22E-13 |
| 500   | 3.79E-13                                                    | 3.67E-12 | 3.61E-12 | 5.13E-13 |
| 600   | 5.78E-13                                                    | 4.60E-12 | 4.56E-12 | 6.29E-13 |
| 700   | 8.05E-13                                                    | 5.65E-12 | 5.62E-12 | 7.69E-13 |
| 800   | 1.06E-12                                                    | 6.82E-12 | 6.79E-12 | 9.36E-13 |
| 900   | 1.18E-12                                                    | 8.12E-12 | 8.07E-12 | 1.13E-12 |
| 1000  | 1.46E-12                                                    | 9.54E-12 | 9.44E-12 | 1.35E-12 |
| 1100  | 1.77E-12                                                    | 1.11E-11 | 1.09E-11 | 1.61E-12 |
| 1200  | 2.11E-12                                                    | 1.28E-11 | 1.25E-11 | 1.89E-12 |
| 1300  | 2.47E-12                                                    | 1.46E-11 | 1.42E-11 | 2.20E-12 |
| 1400  | 2.87E-12                                                    | 1.65E-11 | 1.59E-11 | 2.55E-12 |
| 1500  | 3.29E-12                                                    | 1.85E-11 | 1.77E-11 | 2.92E-12 |
| 1600  | 3.75E-12                                                    | 2.07E-11 | 1.97E-11 | 3.33E-12 |
| 1800  | 4.77E-12                                                    | 2.53E-11 | 2.37E-11 | 4.24E-12 |
| 2000  | 5.92E-12                                                    | 3.04E-11 | 2.81E-11 | 5.27E-12 |
| 2200  | 7.21E-12                                                    | 3.59E-11 | 3.28E-11 | 6.43E-12 |
| 2500  | 9.44E-12                                                    | 4.48E-11 | 4.02E-11 | 8.39E-12 |
| 2800  | 1.20E-11                                                    | 5.46E-11 | 4.82E-11 | 1.06E-11 |
| 3000  | 1.39E-11                                                    | 6.16E-11 | 5.37E-11 | 1.23E-11 |
